# Supplementary material for: Integrative analysis of common genes and driver mutations implicated in hormone stimulation for four cancers in women
Source: PeerJ. 2019 Jun 6;7:e6872. doi: 10.7717/peerj.6872 (PMC6556371; doi:10.7717/peerj.6872)
Supplement: Supplemental Information 3 [file peerj-07-6872-s003.xlsx]

## Sheet: Sheet1
Endometrial cancer	Ovarian cancer	Breast cancer	Cervical cancer
PTEN	BRCA1	AAMP	AIM2
MSH6	ERBB2	AARS	BAT2L2
HNF1B	BRCA2	ABAT	CACYBP
TP53	KRAS	ABCA2	CDA
ESR1	CCNE1	ABCA3	CELA2A
PGR	TP53	ABCC6	CR1
MLH1	PTEN	ABCC8	CRABP2
CYP19A1	PIK3CA	ABCD3	CRCT1
MSH2	WWOX	ABCG1	CRNN
PIK3CA	MYC	ABCG2	CSF-1
CYP17A1	AKT2	ABHD2	CTSS
KRAS	CDKN2A	ABL2	CYR61
ERBB2	BRAF	ABLIM3	DAP3
CYP1A1	RB1	ACAA2	DDOST
CYP1B1	MLH1	ACADM	DTL
VEGFA	AKT1	ACADS	E2F2
CTNNB1	CTNNB1	ACADSB	EDN2
AKT1	CDH1	ACAT2	EFNA1
AR	DIRAS3	ACN9	EXO1
ESR2	BRIP1	ACOT7	HIST2H2BE
MDM2	VEGFA	ACOT9	IER5
COMT	TERT	ACOX2	IFI16
MMP2	AURKA	ACOX3	IFI6
MMP9	SPARC	ACP5	IL10
HIF1A	BCL2L1	ACPP	ILF2
CDH1	CCND1	ACTB	IVL
EGFR	RBP1	ACTG2	JAK1
BRAF	RAD51C	ACTR1A	KCNC4
BRCA1	RAB25	ACVR2B	KIAA1324
UGT1A1	KLK10	ACY1	LMX1A
HSD17B1	ATR	ADA	MUL1
CCND1	PLAT	ADAM15	MYCL1
XRCC1	OPCML	ADAM23	NRAS
CYP11A1	NOTCH3	ADAM8	PTGS2
MUTYH	NF1	ADAMDEC1	RGS1
IGF1	ATM	ADAMTS1	RUNX3
BRCA2	MAP3K1	ADARB1	S100A10
LEP	EPCAM	ADCY9	S100A7
GSTP1	LTBP1	ADCYAP1	S100A8
IL6	IGF2	ADD1	S100A9
PPARG	APC	ADD2	SFN
SULT1E1	MECOM	ADD3	SPRR1A
MMP7	ERBB3	ADFP	SPRR1B
FAS	EGFR	ADH1B	SPRR2A
NCOA3	CHEK2	ADK	SPRR2B
SULT1A1	KLK11	ADM	SPRR3
OGG1	CDKN2B	ADORA2A	TGFB2
CHEK2	CDKN1A	ADORA2B	TP73
SHBG	CDK2	ADSL	A2M
PMS2	DLEC1	AFF3	CAMKK2
TGFB1	CDC25B	AFP	CCND2
LEPR	CD44	AGAP2	CD63
ERCC1	ABCG2	AGFG1	CDK2
FTO	MUC16	AGR2	CDKN1B
MTHFR	ACVR2A	AGR3	CHFR
IRS1	SELENBP1	AGTPBP1	CLEC2B
CRP	CFLAR	AGTR1	DDIT3
ACE	TNFRSF10A	AHR	EMP1
GSTT1	TNFSF10	AIF1	ENDOU
TERT	SKAP1	AIG1	EPS8
TLR4	AXIN2	AIM1	GAPDH
STAR	NCOA3	AIM2	GLI1
MUC1	VTCN1	AIP	GLTP
MMP3	CALCA	AK2	GYS2
POT1	PAX8	AKAP12	HOXC10
RB1	XRCC2	AKAP13	HSPB8
IGFBP3	XRCC1	AKAP9	IFNG
TIMP2	XPA	AKR1B1	IGF1
MMP1	TYMS	AKR1C2	IGFBP6
SRD5A2	TNF	AKR7A2	KITLG
GSTM1	HNF1B	AKR7A3	KRAS
ADRB3	STAT3	AKT1	KRT1
MGMT	SOD2	AKT2	KRT18
CCL2	BMP4	AKT3	KRT3
IGFBP1	SHMT1	ALCAM	KRT4
HHEX	MAP2K4	ALDH1A2	KRT6B
TYMS	BCL2	ALDH1A3	KRT7
CASP8	RBBP8	ALDH3A2	KRT8
SFPQ	RAD51	ALDH4A1	LGR5
IRS2	BARD1	ALDH6A1	MDM2
NME1	PTPN1	ALDH9A1	NTF3
UGT2B7	PTGS1	ALG6	NTN4
ABCB1	C11orf30	ALK	OAS3
ATM	EIF5A2	ALOX12	P2RX4
TIMP1	MAPK1	ALPK3	PA2G4
ATR	PRKCI	AMD1	PEBP1
CASP7	BNC2	AMFR	POP5
IGF2	PPARG	AMPD1	RAPGEF3
CDKN2A	PLAUR	AMPD3	RARG
PTGS2	PLAU	AMPH	TBX3
BCL2	PLAGL1	AMY2A	VWF
WFDC2	ABCB1	AMY2B	APLP2
FGFR2	PEG3	ANAPC10	BANF1
ADIPOQ	PARK2	ANG	CADM1
WT1	SERPINE1	ANGPTL4	CALCA
CDKN1B	PCSK6	ANK3	CCND1
GPER1	NBN	ANKRD17	CD44
IGF1R	MUC4	ANKRD30A	CRYAB
CYP1A2	MUC2	ANKRD30B	CTSC
LCN2	MUC1	ANLN	CTSF
HSPA5	MTHFR	ANXA11	FANCF
MTOR	MSH3	ANXA3	GSTP1
CFLAR	MSH2	ANXA9	HRAS
MUC16	MPO	AOC3	HSPB2
PTGFR	MMP14	AP1M2	IFITM1
NOTCH1	MMP9	AP2B1	IGF2
PROM1	MMP7	APBB2	IL18
SERPINB5	MMP3	APC	LDHA
CDKN1A	MMP2	APEH	MAP3K11
FOXO1	MMP1	APEX1	MMP1
CXCL12	MKI67	APH1A	MMP10
MKI67	MDM4	APLP2	MMP12
BMI1	MDM2	APOA1	MMP13
PAEP	MCAM	APOD	MMP3
CYR61	SMAD4	APOE	MRPL11
STS	KIT	APPBP2	MYOD1
RAD51	ITGB3	APPL2	ORAOV1
IL11	AR	AQP1	PGR
HOXA10	INSR	AQP3	POU2F3
VEGFC	IL18	AQP7	PPP2R1B
PTK2	IL6	AQP9	RARRES3
POLE	FASLG	AQR	RTN3
DICER1	IGFBP3	AR	SAA1
FOXA1	IGF1R	ARAP2	SIPA1
TMEM140	IGF1	ARCN1	SLC3A2
NFKB1	ICAM1	ARFGAP3	SPA17
CXCL8	BIRC5	ARG2	ST14
ETV5	HRAS	ARHGAP21	STARD10
SPP1	HOXD1	ARHGAP4	TMEM132A
POLD1	HOXB2	ARHGAP8	TRIM29
S100A4	HLA-DRB1	ARHGDIB	VEGFB
RASSF1	HLA-DQA1	ARHGEF16	WT1
STAT3	HIF1A	ARHGEF6	YIF1A
FGF2	MSH6	ARID4B	ALDH7A1
GGT1	GSTP1	ARL3	APC
KDR	GSTM1	ARL4D	BASP1
PRKCA	CXCL1	ARMC1	BRD9
PARK7	DNAJC15	ARNT2	BXDC2
TGFBR3	GNRH1	ARPC1B	C5orf22
NR5A1	GJB2	ARPC3	C5orf28
CLDN4	AMH	ARPC5	CCNB1
NKX2-1	TIPARP	ARSA	CSF1R
GJB2	GALT	ART3	DHFR
TNFSF10	SPDEF	ARVCF	DUSP1
MIR204	FSHR	ASAH1	FASTKD3
RUNX1	FOLR1	ASB9	FGF1
IGF2BP3	FN1	ASNS	GPX3
TP63	FANCD2	ASPM	HIN-1
CEACAM5	ESR1	ASPN	ITGA1
EP300	ERCC5	ASS1	NDUFS6
CD82	ERCC3	ATAD2	NNT
PTTG1	ERCC2	ATF3	OSMR
APC	ERCC1	ATF4	PAIP1
STMN1	EPHX1	ATG7	PAPD7
CRHR1	EGF	ATM	PTTG1
MSI1	E2F5	ATP11B	RNASEN
HAS1	E2F3	ATP1B3	RPL37
TFF3	E2F2	ATP2A2	SCAMP1
PPIA	E2F1	ATP2C1	SDHA
EZH2	DPYD	ATP5C1	SEPP1
CTNNBIP1	DPH1	ATP5G3	SKP2
BAX	DNMT3B	ATP6AP1	SPARC
HTRA3	DNMT1	ATP6V0A2	SPINK5
PIK3R1	GADD45A	ATP6V1C1	TARS
INHA	DAB2	ATP7B	TERT
MIR145	CYP3A4	ATPAF2	TMCO6
DKK3	CYP1B1	ATR	TRIP13
SDC1	CTSD	AURKA	ACADVL
ZEB1	GSTO2	AURKB	ALOX12
SOX4	ARL11	AVL9	ALOX12B
INHBC	FILIP1L	AZGP1	BIRC5
HPSE	RASSF1	BACE2	BRCA1
PTENP1	CDKN2D	BAD	C1QBP
TCF7L2	CDKN2C	BAG1	COL1A1
SPAG9	CDKN1C	BAG3	CUEDC1
MIR205	CDKN1B	BAG4	ERBB2
NTRK2	CDK4	BAI2	GRB2
HTRA1	MVP	BAIAP3	HIC1
SLC2A1	CDC25A	BARD1	HOXB6
PELP1	CDC20	BAT2	KRT10
PPP2R1A	GAB2	BAX	KRT13
TWIST1	ARMCX2	BAZ2B	KRT15
MET	SEMA3E	BBC3	KRT17
EBAG9	CD63	BBOX1	KRT19
VIM	CD47	BBS2	KRTHA3B
EIF4EBP1	CD40	BCAM	LSMD1
XRCC3	THEMIS2	BCAR1	MRPS23
HGF	CD34	BCAR3	NME1
HOTAIR	CD86	BCAS1	NME2
CYP3A	CD80	BCAS2	NPTX1
PRKCD	CGB5	BCAS3	PDK2
BUB1	PGAP3	BCAS4	PECAM1
CD44	CD9	BCL10	PHB
YTHDC1	CHMP4C	BCL11A	PRR11
WNT10B	AURKB	BCL2	RARA
ESRRG	ZNF300	BCL2A1	STAT3
SKP2	OSMR	BCL7B	TIMP2
CCNG1	LPAR2	BECN1	TMC6
DKK1	TMSB10	BGN	TOB1
CXCR4	EBAG9	BHLHE40	TOP2A
PDGFD	PYGO2	BIN1	TP53
EPCAM	CLDN1	BIN2	ADRM1
PLAUR	CCND3	BIRC2	AHCY
PTPRG	CCND2	BIRC3	ASXL1
RINT1	CCNB1	BIRC5	ATP9A
MIR203A	SOCS2	BLCAP	B4GALT5
MIR661	CBR3	BLID	BCL2L1
ADAM19	HYAL2	BLM	C20orf20
TSC2	BECN1	BLMH	C20orf30
KDM4A	SOCS1	BLVRA	CDH4
SLC22A16	ABCB11	BMI1	CEBPB
RET	RNASET2	BMP4	CSE1L
S100A8	TP63	BMP6	DDX27
CDX2	PPAP2A	BMP7	E2F1
CCNE1	PLA2G4C	BMPR1B	EDN3
HAS2	CAV1	BMPR2	GSS
LOC643623	IFITM1	BNC1	LAMA5
TP73	MIEN1	BNIP2	MMP9
TYMP	CASP8	BNIP3	PAX1
TRA2B	CASP5	BOP1	PCNA
MIR27A	CASP3	BPI	PIGT
RNR1	NRIP1	BRAF	POFUT1
CDC25B	CAMK4	BRCA1	PTK6
RCAN3	GPR68	BRCA2	RALY
SMARCE1	COL18A1	BRD8	RBL1
DLD	TUSC3	BRF2	RNF114
CEACAM1	RHBDF2	BRMS1	SEMG2
DNMT1	SEMA3B	BRMS1L	STAU1
CDK6	CXCR4	BTF3	STX16
RDH16	IL1R2	BTG2	SYCP2
LRP1	DDR1	BTG3	TCEA2
AURKB	PRDM2	BUB1	TGM3
MC4R	XRCC4	BYSL	THBD
HSPE1	XRCC3	BZW1	TPX2
SPOP	XPC	C10orf116	ZNF217
STOML2	WT1	C11orf17	CD83
EPHA2	WNT2B	C11orf41	CDC40
NOD2	WNT5A	C11orf73	CDKN1A
OGT	EZR	C11orf75	CITED2
HDAC1	VEGFC	C12orf5	CRISP3
ERCC5	VDR	C14orf115	CTGF
SERPINE1	UTRN	C14orf132	DEK
LTA	TWIST1	C16orf80	E2F3
HDAC2	C3	C18orf1	EDN1
ND3	TOP2A	C18orf10	ESR1
DROSHA	TNFRSF1B	C1orf38	GJA1
ACKR3	SERPING1	C1QA	GRM4
ADIPOR2	TIMP2	C1QB	GTF2H4
MST1	TIMP1	C1S	HIST1H1C
UGT2B17	THY1	C2	HLA-C
MYC	TGFBR1	C20orf103	HLA-DQB1
LLGL1	TGFB1	C20orf24	HLA-DRA
SREBF1	TERC	C20orf46	HLA-DRB3
APOE	BUB1	C21orf59	HLA-DRB5
TNFRSF12A	TCF7L2	C3	MCM3
RNASET2	TBX3	C4B	ME1
GALR1	SULT1A1	C5orf13	MLLT4
TERF2	STK11	C8orf4	NOL7
MMP12	STAT5A	C9orf46	NRM
ADH1A	STAT1	C9orf7	PLAGL1
COL17A1	ST8	CA1	PSMB9
EPOR	SST	CA11	THBS2
FASN	SPP1	CA12	TNF
TLR2	FOXL2	CA2	TREM2
SOX7	SOX9	CA3	TUBB2
VCAN	SOD1	CA9	VEGFA
INHBE	SNCG	CACNA1D	ANXA4
LAPTM4B	SNAI1	CACNA2D2	ATIC
NCOR1	BMPR2	CACNG1	CD28
YY1	SLC2A1	CAD	CXCR2
ESRRA	SKP2	CALB2	EPCAM
MAP2K4	BMP2	CALD1	ERBB4
HCRTR2	LOC648570	CALML4	HDLBP
MAPK8	SHBG	CALML5	HSPD1
DUSP6	CXCL12	CALR	ICOS
MIR194-1	SDC1	CALU	IGFBP2
NDRG1	CCL11	CAMK1	IGFBP5
CSNK2B	CLEC11A	CAMK1G	IL1A
DDR1	SAT1	CAMLG	IL1RN
BID	CLIP1	CANX	ITGA4
IGFBP7	RPS6KB1	CAP2	ITGA6
CCNA2	ROCK1	CAPG	ITGAV
TLR3	BACH2	CAPN3	ITM2C
EIF2AK2	RNASE2	CAPN6	MAL
MTA1	TRIM27	CARS	MSH2
CDH13	ZNF350	CASP3	MYCN
MMP14	RBL2	CASP4	NCL
MIR9-1	RAF1	CASP8	OSR1
TLR9	SCAF1	CAV1	PDCD1
ENOSF1	PVT1	CAV2	PIGF
CASC2	BAX	CBFB	RPRM
LIMS1	KIAA1324	CBLB	RRM2
KRT7	PTK2	CBR1	SDC1
CXCL10	PTHLH	CBR3	SP100
PTGDR	PTGS2	CBX1	STAT1
HDAC4	BAGE	CBX3	TGFA
JAK1	PTGDS	CCDC109B	CDH1
MIR148A	BAD	CCL13	CDH11
MUC5B	BACH1	CCL18	CDH13
ATF6	ACKR3	CCL19	CDH15
MIR34B	TCEAL7	CCL2	CDH3
IPO13	B2M	CCL3	CES1
CGRRF1	MMP26	CCL4	CNOT1
XPC	HTRA1	CCL5	CYBA
SCUBE2	KLK6	CCNB2	E2F4
RCAN1	KLK7	CCNC	FANCA
PAK4	MAP2K3	CCND2	FUS
HOPX	MAP2K1	CCNE1	GFOD2
CRHR2	MAPK8	CCNE2	HBA2
GLI3	MAPK3	CCNF	HS3ST2
CCND3	FAM222B	CCNG2	IL32
ERCC2	PRKACA	CCNH	MMP2
BDKRB1	KLK15	CCNI	MSLN
CLDN3	FBXW7	CCR1	MT1G
TRNL1	TMEM140	CCR5	NAE1
MIR99A	PPP2R5D	CCR7	NDRG4
SPRY2	PPP2R4	CCT2	NQO1
MIR129-2	PPARD	CCT4	PPL
EMX2	UGT1A1	CCT6A	PYCARD
CCR2	PON1	CD14	RBL2
FOS	POLB	CD163	RRAD
FOXC1	ATP7B	CD164	SLC7A6OS
KIAA1524	PMS2	CD180	SOCS1
KISS1R	ATP7A	CD19	VPS35
KEAP1	FXYD1	CD1C	APOC1
TIMP3	PLK1	CD2	BST2
NOD1	SERPINB5	CD200	C3
WWOX	PHB	CD247	CCNE1
C19orf33	PGR	CD36	CEACAM1
NFE2L2	RSF1	CD37	CEACAM5
CASP3	SERPINF1	CD3D	CEACAM6
GLI2	CDK12	CD3G	CEACAM7
EPAS1	NLK	CD40	DNMT1
ND1	PDGFRB	CD44	GDF15
MTDH	PDGFRA	CD46	IRF3
PTP4A3	PDGFB	CD48	JUNB
RNF43	SCARA3	CD52	KLK10
ADAMTS1	TNFRSF12A	CD53	KLK11
IL1A	HSD17B12	CD55	KLK12
CACNA2D3	FOXP3	CD63	KLK13
MT1E	OVGP1	CD68	KLK2
BIRC2	OGG1	CD69	KLK7
RPS6KA2	DDR2	CD74	KLK8
OVGP1	NTRK2	CD82	LGALS7
TNFSF12	NT5E	CD83	RPS19
VHL	NOS3	CD86	RRAS
WNT7A	NOS2	CD8A	STK11
SLC29A2	NEO1	CDC123	SULT2B1
MIR21	MUC5AC	CDC2	TGFB1
NANOG	MIR370	CDC20	TYK2
MDK	ABCC1	CDC25B	UPK1A
TET2	ACHE	CDC25C	XRCC1
CD24	CXCL9	CDC34	APOD
SUFU	MGP	CDC42BPB	BLU
KLK4	KITLG	CDC42EP1	CAMKV
PRKCDBP	MFAP4	CDC45L	CCR2
STK11	MEST	CDCA8	CLDN1
PPARGC1A	MEN1	CDH1	CTNNB1
APBA2	MAP3K3	CDH11	ECT2
NR1I2	MCM2	CDH19	FHIT
BDKRB2	MBL2	CDH3	FOXL2
LAMC2	MAPT	CDH6	HLTF
RPS6KA2-AS1	MAGEA1	CDK2	HYAL1
LGALS3	MAD2L1	CDK2AP1	LHFPL4
KSR1	NBR1	CDK4	LSM3
MIR130B	MIR9-1	CDK6	MCM2
MIR200A	MIR27A	CDK7	MLH1
SMAD7	MIR222	CDKL2	PCNP
MUC8	MIR221	CDKN1B	PLOD2
ERCC4	MIR21	CDKN1C	PLSCR1
GH1	MIR206	CDKN2A	RAF1
SERPINB2	MIR205	CDKN2B	RARB
TSNAX	MIR200C	CDKN2C	RASSF1
MIR199B	MIR200A	CDKN3	RBP1
NUP88	MIR191	CDO1	RPL39L
KCNN4	MIR185	CDS1	RPSA
XPA	MIR146A	CDT1	TFRC
RPS6KA6	MIR145	CEBPB	VHL
SCGB2A2	MIR140	CEBPG	ZBED2
SLC2A3	MIR139	CEBPZ	C4orf41
SPA17	MIR125B1	CELSR1	CPE
SCRIB	MIR125A	CELSR2	CWH43
SPINT1	MIR10B	CENPA	EDNRA
PIK3C2A	MIRLET7B	CENPE	EREG
CBR1	MIRLET7A3	CENPF	FGF2
FOLH1	LY75	CENPN	HOPX
TNKS2	LRP1	CEP57	HPGD
MIR503	LHCGR	CES1	IL8
MIR193A	LGALS1	CFB	KIT
PLD1	LCN2	CFLAR	KLF3
MTA3	LASP1	CGB	LARP7
UCP2	L1CAM	CHAD	MSX1
P2RX7	KPNA2	CHAF1A	NEK1
SCGB2A1	KISS1	CHAF1B	NKX6-1
ARTN	KDR	CHD6	PCDH10
TNFAIP8	AREG	CHEK1	PDGFRA
SLC22A17	CD82	CHEK2	PRDM5
GHRL	JUN	CHGA	S100P
FBXW7	ITGB1	CHGB	SFRP2
FHIT	ILK	CHI3L1	SPP1
MIR106B	IL13RA2	CHI3L2	TBC1D1
TDGF1	IL10	CHIC2	TLR2
GLI1	CXCR2	CHKA	TMPRSS11D
KRT5	CXCL8	CHL1	TMPRSS11E
HINT2	IL1RN	CHN1	VEGFC
TES	IL1A	CHN2	AEBP1
ZMYM4	FAS	CHORDC1	ANLN
GLO1	KLK3	CHPT1	BRAF
LHCGR	CYR61	CHRD	BZW2
MIR200B	IGFBP5	CHST2	CDK6
HNF1A	IGFBP2	CIB1	EGFR
CXCL11	IGFBP1	CIRBP	EZH2
MIR152	APOE	CISH	GARS
PEPD	APOA1	CIT	HOXA1
RCAN2	HSPE1	CITED1	IGFBP3
RPL22	HSPB2	CKAP2	IL6
MAPK1	HSPB1	CKS1B	ITGB8
MIR22	XIAP	CKS2	MET
NAPSA	HSD17B1	CLCN4	PRSS2
SNCG	BIRC2	CLDN1	SFRP4
KIAA1324	APEX1	CLDN10	STK31
MAP3K8	HOXB8	CLEC3B	TFPI2
GDF15	HOXB5	CLGN	TRA2A
PAWR	HOXA9	CLIC1	TWIST1
MIR3201	HMGA1	CLIC4	ANXA1
LINGO2	HLA-DQB1	CLN3	AQP3
CCR1	HLA-DMB	CLNS1A	BAG1
HAS3	HLA-C	CLTC	BICD2
SPARC	HLA-A	CLU	CDKN2A
COX1	CTAG2	CMPK1	CDKN2B
KLF9	HGF	CNGB1	CKS2
TARP	ANXA4	CNN1	CLIC3
GCNT1	HDAC1	CNN3	CTSL1
TNF	H1F0	CNNM4	DAPK1
HMMR	GSTT1	CNO	ENG
MIR155	GSK3B	COASY	EPB41L4B
CDK8	PYCARD	COG1	INPP5E
IL11RA	BABAM1	COL14A1	MRPS2
CCL20	GRN	COL17A1	PRSS3
GATA4	GRB7	COL1A1	RCL1
MIR30C1	GPLD1	COL1A2	SYK
RUNX3	GPC1	COL23A1	TGFBR1
ADAM12	SFN	COL3A1	TLR4
LOC101928765	GNRH2	COL4A1	ANXA8
NR5A2	AGO2	COL4A5	ARHGAP12
MAPK3	ANKRD1	COL5A1	BNIP3
MIR199A1	GJB1	COL5A2	CPEB3
PAK3	GJA1	COL6A3	DNAJC9
ATAD2	AMHR2	COL9A3	FGFR2
DHRS2	STEAP1	COPB2	GATA3
SPINT2	EHF	COPG	ITGB1
CTSV	GATA6	CORO1A	MGMT
FAM19A5	GAS6	CORO1C	NEBL
SHH	KLK13	COX4I1	OAT
EPO	CHD5	COX4NB	PDCD4
HOXB13	BRMS1	COX6A1	PPP1R3C
UBE2C	KLK5	COX6C	PTEN
TERF1	GAGE1	COX7A2L	SCD
L1CAM	RICTOR	CP	SFRP5
MLH3	MTOR	CPA4	ADAM9
	FRA9E	CPB1	DLC1
	LPAR3	CPE	DUSP26
	FOS	CPM	E2F5
	DICER1	CRABP1	LY6D
	PSD3	CRAT	LYPLA1
	SYNE1	CREB1	MCM4
	FLT1	CREB3L2	MYC
	FOXM1	CREB3L4	NDRG1
	DKK1	CREBL2	PLAT
	FGFR2	CRELD1	SFRP1
	FGF2	CRIP1	SLURP1
	FGF1	CRIP2	SULF1
	FASN	CRLF3	TNFRSF10C
	FANCF	CROT	ANXA2
	ETV4	CRP	C15orf48
	ETS1	CRYAA	CPEB1
	ESRRA	CRYAB	CTSH
	ESR2	CRYM	DUT
	ERBB4	CS	FGF7
	EPOR	CSDA	IMP3
	EPO	CSE1L	MEF2A
	EPHB4	CSF1R	ONECUT1
	EPHA5	CSK	PDIA3
	EPHA1	CSNK1D	RHCG
	EPHA2	CSNK2A1	THBS1
	EFNA1	CSPG4	TSPAN3
	EEF1A2	CSRP2	C13ORF18
	EDNRA	CST4	CCNA1
	EDN1	CST6	FLT1
	TYMP	CSTA	GTF2F2
	E2F4	CSTB	HMGB1
	AGTR1	CSTF3	IPO5
	TSC22D3	CTAG2	MBNL2
	JAG1	CTBP2	PTPN6
	DPP4	CTCF	SCEL
	NQO1	CTDSP1	SOX1
	DDB2	CTDSPL	BCL2
	DCC	CTNNA1	CDH2
	DAPK1	CTNNAL1	DSG1
	CYP19A1	CTNNB1	DSG2
	CYP17A1	CTPS	EPB41L3
	PEBP4	CTR9	NOL4
	CYP2E1	CTSB	SERPINB5
	CYP1A2	CTSC	SMAD2
	CYP1A1	CTSD	SMAD4
	CXADR	CTSE	TYMS
	CTSL	CTSF	APOL2
	CTSB	CTSK	ARHGAP8
	CTNNA1	CTSL1	CELSR1
	IL23R	CTSL2	DMC1
	CTGF	CTSS	KCNJ4
	CTAG1B	CTSZ	MCM5
	CSF3	CTTN	MMP11
	CSF1	CUL2	MYH9
	PARP1	CUL4A	TIMP3
	CRYAB	CUX1	UFD1L
	CREBBP	CWC15	AKT1
	CLDN3	CX3CL1	ANG
	CLDN4	CX3CR1	BCL2L2
	ADM	CXADR	ESR2
	KLF6	CXCL10	HSP90AA1
	COMT	CXCL11	MMP14
	ACVR1C	CXCL9	SERPINA3
	ANKLE1	CXCR4	SIX1
	ABCC2	CXCR6	FLNA
	KLK8	CXCR7	HUWE1
	LZTS1	CXXC5	MSN
	PTP4A3	CYB5A	PLP2
	BTN3A1	CYB5R1	TIMP1
	CHEK1	CYB5R2	TKTL1
	TOPBP1	CYBA	TLR8
	STAG3	CYBB	VSIG4
	CXCR6	CYP19A1	DNMT3L
	SPINT2	CYP1B1	ITGB2
	PDPN	CYP27A1	PWP2H
	MTHFS	CYP2B6	RUNX1
	AGPAT2	CYP2E1	TFF3
	CDX2	CYP39A1
	DLC1	CYP4A11
	TUBB3	CYP4B1
	PAK4	CYP51A1
	MSLN	CYR61
	CDK6	CYTH1
	CDH16	CYTH4
	CDH13	DAB2
	RAD50	DACH1
	CD24	DAG1
	AKT3	DAPK1
	CDC42	DBNDD2
	RBX1	DCI
	THRAP3	DCK
	CDC25C	DCLK1
	WDR1	DCLK3
	MAGEC1	DCN
	KIF14	DCPS
	ZBTB40	DCTD
	NUAK1	DCTN1
	ELMO1	DCUN1D4
	PLEKHM1	DDIT3
	ZEB2	DDR1
	KEAP1	DDR2
	IST1	DDX11
	MAML1	DDX21
	RASSF2	DDX39
	KMT2B	DEAF1
	HDAC9	2001-12-01
	DOCK4	DEF8
	UTP14C	DEFB1
	DHX34	DEK
	CD70	DEPDC1B
	GREB1	DGCR8
	LIMS3	DGKD
	CD59	DHCR24
	IKBKE	DHCR7
	ISG15	DHPS
	KLK4	DHRS2
	MTRF1	DHRS4
	NCOR1	DHRS7
	PRDX6	DIAPH2
	APOBEC3B	DIO1
	SPAG6	DIP2C
	BCAR1	DIRAS3
	CHD1L	DIS3
	CXCL14	DKC1
	TP53I3	DKK1
	PTGES	DKK3
	BAG3	DLC1
	ENTPD1	DLG1
	GDF15	DLG3
	NAPSA	DLGAP5
	FOXQ1	DLL1
	FADS2	DMBT1
	HTRA3	DMD
	HS6ST1	DNAJA2
	CD27	DNAJA4
	ADIPOQ	DNAJB11
	UBE4A	DNAJB2
	SLIT2	DNAJC2
	RPL23	DNALI1
	TCEAL1	DNM1L
	B4GALT5	DNMT1
	CD163	DNMT3A
	MS4A1	DNMT3B
	ACVR2B	DOCK2
	GPR55	DOK1
	BCL7C	DOPEY2
	GCNT3	DPAGT1
	PTTG1	DPM1
	DLG5	DPP4
	MTDH	DPYD
	XPR1	DPYSL2
	CD247	DRAP1
	CABLES1	DRG1
	SCAF11	DSC2
	SLFN11	DSC3
	EXO1	DSG2
	RSAD2	DSG3
	SLC28A1	DST
	DYRK1B	DTL
	ZNF502	DTX2
	CCNE2	DUSP1
	CCNB2	DUSP13
	SLC16A5	DUSP2
	LATS1	DUSP4
	MTA1	DUSP9
	NMI	DYSF
	DPP9	E2F1
	ACVR1B	E2F3
	USP2	E2F5
	USP14	EBAG9
	LOC90768	EBF4
	CLDN10	EBI3
	ANGPTL1	ECE1
	UBE2M	ECHDC1
	MAP3K14	ECHDC2
	HS6ST2	ECM1
	CCNG2	ECT2
	CCNG1	EDN1
	ACVR1	EDNRB
	CCNF	EED
	SERPINB11	EEF1A2
	P4HA2	EEF1D
	WASF1	EEF2
	BCL10	EFNB1
	TRIM4	EFR3A
	CCNA1	EFS
	CCNA2	EGF
	PRPF4B	EGFL6
	MTMR3	EGFR
	SPHK1	EGLN2
	VNN2	EGR1
	ST3GAL5	EGR2
	KAT2B	EI24
	TSC22D1	EIF1AY
	PROM1	EIF2B3
	HDAC3	EIF2C2
	WISP1	EIF3E
	IQGAP1	EIF5A
	CES2	ELAVL1
	INPP4B	ELF3
	FGF18	ELOVL2
	IL18R1	ELOVL5
	TNFRSF10B	ELP2
	CD164	EML2
	CBS	EML4
	TNFSF9	EMP2
	TNFSF12	ENAH
	ADAM19	ENC1
	URI1	ENPP1
	SERPINB7	ENPP2
	PEA15	ENSA
	IRS2	EPB42
	CBFB	EPHA1
	NCOA1	EPHA10
	CHRD	EPHA2
	AKR1C3	EPHB3
	RUNX3	EPHB4
	PPAP2C	EPHX2
	RUNX1	EPRS
	RUVBL1	EPYC
	TNFSF11	ERBB2
	RUNX2	ERBB2IP
	STK16	ERBB3
	PRKRA	ERBB4
	PDLIM4	ERCC1
	LGR5	ERCC2
	CCDC65	ERGIC1
	FCN3	ERGIC3
	TSPYL5	ERLIN2
	BARX2	ERO1L
	SHANK3	ESM1
	DDO	ESPL1
	RERG	ESR1
	RBM17	ESR2
	TNS4	ETFB
	PPM1D	ETS1
	AIFM2	ETV7
	HAVCR2	EVI2A
	RTN4IP1	EVI2B
	HIRIP3	EVL
	OGT	EVPL
	MYO18B	EXO1
	KISS1R	EXOSC9
	CUL1	EXT1
	CUL3	EXTL2
	ACRBP	EYA2
	CUL4B	EZH2
	MAML2	EZR
	TMEM101	F13A1
	MRPL45	F2
	CASP10	FAAH
	TBC1D3F	FABP1
	ZMYND12	FABP3
	ASCC2	FABP4
	HORMAD1	FABP5
	SPARCL1	FABP7
	REG4	FADD
	NME5	FADS2
	MAD1L1	FAH
	GRWD1	FAM134B
	JAM3	FAM13B
	CASP4	FAM179B
	CRISPLD1	FAM20A
	HIST1H4H	FAM84B
	SOX7	FANCA
	HIST1H3E	FANCL
	HIST1H2BO	FAP
	APH1B	FARP1
	HIST1H2BI	FARP2
	HIST1H2BE	FAS
	HIST1H2BN	FASN
	CASP1	FBL
	HIST1H2AM	FBLN1
	HIST1H2AB	FBN1
	FZD1	FBP1
	BAP1	FBXL2
	ARID1A	FBXL5
	CAPN2	FBXO3
	CAPN1	FBXO31
	PNPLA4	FBXO5
	CAPG	FBXW7
	CLTCL1	FCGR1A
	CAMP	FCGR2A
	MED25	FCGR2B
	ZNF611	FCGR3A
	RNF146	FCGR3B
	CAMK2G	FDPS
	CAMK2D	FDX1
	DIAPH3	FDXR
	PVRL4	FEN1
	SLC38A1	FEZ1
	BCPR	FGD3
	SLC7A5	FGF18
	OR4F17	FGF8
	ACTN4	FGFBP1
	HMGA2	FGFR1
	APOL6	FGFR2
	MFAP5	FGFR3
	SLC44A4	FGFR4
	CD276	FGL2
	ULBP2	FHIT
	PDGFD	FHL1
	MLLT10	FHL2
	ITPKC	FIGN
	DBF4B	FILIP1L
	PTGES2	FKBP5
	CCDC170	FLII
	FBXL18	FLNA
	C14orf159	FLNB
	NANOG	FLOT2
	ACTR5	FLT1
	CYBRD1	FLVCR2
	PRR5L	FMNL1
	GGNBP2	FMO5
	ZNF671	FMOD
	NEK11	FMR1
	VASH2	FOLR1
	TFPI2	FOSB
	SHFM1	FOXA1
	LRRC31	FOXC1
	MTERF1	FOXG1
	GEMIN7	FOXJ1
	ZFAND1	FOXM1
	PALB2	FOXO1
	LIN28A	FRK
	HSPBAP1	FRZB
	AIMP2	FUCA1
	MCPH1	FUT3
	EFTUD1	FUT4
	SH3TC2	FUT8
	BIRC7	FXR2
	CALB1	FXYD1
	TTPAL	FXYD3
	ALDH5A1	FXYD5
	DEK	FZD9
	CHAC1	G3BP1
	WDR77	GABRE
	ATG9A	GABRP
	ALG8	GAD1
	ZNF655	GADD45A
	PTP4A1	GADD45G
	DNALI1	GALC
	ZNF217	GALE
	ZNF184	GALK1
	CA9	GALNT10
	ZNF76	GALNT2
	MZF1	GALNT3
	ZIC1	GAP43
	ZFP36	GAPDH
	CEMP1	GARS
	XRCC5	GART
	XPO1	GAS8
	XDH	GAST
	WNT11	GATA3
	WNT10B	GATA6
	WNT7A	GBP1
	WNT2	GBP2
	WNT1	GCAT
	WHSC1	GCH1
	WEE1	GCLM
	WARS	GCSH
	VTN	GDF15
	VGF	GDF5
	VEGFB	GDI1
	VCP	GDI2
	VCAM1	GEM
	VAV1	GFAP
	UQCRH	GFOD1
	UQCRC1	GFRA1
	COL14A1	GGCX
	UCHL1	GGH
	UBB	GIT2
	TYROBP	GJA1
	TBC1D3	GJB1
	TYK2	GJB2
	TXN	GLA
	LINC00977	GLDC
	TTR	GLI3
	TSHR	GLIPR1
	TSG101	GLMN
	TRPC3	GLO1
	TRO	GLRB
	TPT1	GLRX
	TPM4	GLRX2
	TPM3	GLS
	TPM2	GLUD1
	TPM1	GLUL
	TPD52	GM2A
	TP73	GMDS
	C1S	GMFG
	TP53BP1	GMNN
	TOP1	GNA11
	TNFAIP6	GNA12
	TNFAIP3	GNA15
	TNFAIP2	GNAI3
	CLDN5	GNAS
	TMSB4X	GNB4
	TLR4	GNPTAB
	TLE3	GNS
	TK1	GOLGA1
	NKX2-1	GOLGA3
	C1QBP	GOLGA4
	TIMP3	GOLM1
	TIAM1	GOSR1
	KLF10	GOT2
	THRB	GPA33
	THPO	GPC4
	THBS4	GPD1
	THBS3	GPER
	THBS1	GPI
	THBD	GPR126
	TGM2	GPR160
	TGFBR3	GPR183
	TGFBI	GPRC5A
	TGFB3	GPRC5B
	TGFB2	GPSM2
	TGFA	GPX2
	TFF1	GPX3
	TFDP2	GPX4
	TFDP1	GRAMD2
	NR2F2	GRB10
	TFAP2A	GRB14
	TFAM	GRB2
	BUB1B	GRB7
	TECTA	GREB1
	TCP11	GRHL1
	ZNF354A	GRK6
	TCF15	GRP
	ZEB1	GRPR
	MIR642A	GSN
	MIR591	GSS
	MIR569	GSTA3
	MIR449B	GSTM1
	FAM86DP	GSTM3
	TBXAS1	GSTM5
	TBXA2R	GSTT1
	TBX2	GSTZ1
	TBP	GTF2B
	TARS	GTF2E2
	TAL2	GTF2I
	KLF5	GTPBP4
	TAF4B	GUCY2F
	TADA2A	GULP1
	ADAM17	GYPC
	BST2	GZMA
	BST1	GZMB
	SUPT5H	GZMK
	BSG	HAAO
	STK4	HADHA
	STC1	HAGH
	STAT5B	HARS
	STAT4	HBA2
	ST14	HCCS
	TRIM21	HCK
	SREBF1	HCLS1
	SRD5A2	HDAC1
	SRD5A1	HDAC11
	SRC	HDAC3
	SPINK1	HDAC7
	SP1	HDGF
	SOX4	HDGFRP3
	SOX2	HEATR6
	SORD	HEBP1
	SOD3	HEBP2
	FSCN1	HECA
	CENPBD1P1	HEXB
	KCTD14	HEXIM1
	ZBTB10	HEY1
	SNAI2	HFE
	SLPI	HHEX
	SLC15A2	HIC1
	FAM138C	HIPK1
	PAX8-AS1	HISPPD2A
	SLC6A3	HIST1H1A
	SLC5A5	HIST1H1B
	SLC2A4	HIST1H1E
	SLC2A3	HIST1H2AC
	SLC1A4	HIST1H2AD
	GPBP1	HIST1H2AK
	SKIL	HIST1H2BD
	BMP1	HIST2H2BE
	YTHDC2	HK1
	BMI1	HK2
	DEPTOR	HK3
	ZNF574	HLF
	SHMT2	HMBS
	FABP12	HMGA1
	FAM138A	HMGB3
	CSMD1	HMGCL
	SCG5	HMGCS2
	TTC31	HMGN3
	AKTIP	HN1
	CASC16	HNRNPH1
	HIF3A	HOXA5
	TRA2B	HOXB2
	SOX17	HOXC6
	SRSF3	HP
	SFRP5	HPN
	SFRP4	HPSE
	SFRP2	HRASLS
	SFRP1	HRK
	DNAJC1	HSD11B2
	SET	HSD17B1
	FAM138F	HSD17B12
	NOD2	HSD17B4
	SNX16	HSP90AA1
	GOLPH3	HSP90AA2
	SLC28A3	HSP90B1
	C19orf33	HSPA4
	SEMA3F	HSPB1
	CHP2	HSPB8
	ELMO2	HSPC159
	CXCL6	HSPG2
	CCL25	HSPH1
	CCL21	HTATIP2
	CCL18	HTRA1
	CCL13	HTT
	CCL7	HYAL1
	CCL5	HYOU1
	CCL2	IARS
	SERPINB3	ICA1
	SC5D	ICAM1
	SATB1	ICAM2
	SAI1	ICAM5
	SALL2	ID4
	SAA1	IDH2
	S100P	IDI1
	S100A7	IDS
	S100A6	IDUA
	S100A4	IER3
	SORT1	IFI16
	S100A1	IFI27
	RRM2	IFI30
	RRAD	IFI44
	RPS24	IFI6
	RPS6KA2	IFITM1
	MIR484	IFNAR2
	RPS4X	IFNGR2
	MRPL23	IFRD1
	BCR	IGBP1
	FKBP10	IGDCC3
	DHX35	IGF1R
	BRCA3	IGF2
	APOBEC3G	IGF2BP1
	TGIF2	IGFBP2
	RNASEL	IGFBP3
	RNASE1	IGFBP5
	RHEB	IGFBP6
	RGS10	IGFBP7
	RGS2	IGJ
	RFC3	IGLL1
	RET	IKBKB
	RELA	IL10RA
	RECQL	IL13RA1
	RBP4	IL15RA
	RBM3	IL1B
	GNB4	IL1R1
	ALOXE3	IL1RL1
	RBL1	IL20
	RARRES2	IL27RA
	RARB	IL2RB
	RAN	IL2RG
	BCHE	IL32
	RAD52	IL6ST
	RAD51D	IL7R
	RAD51B	ILF2
	RAD9A	ILF3
	RAC1	IMPA2
	RAB5A	IMPDH2
	PXN	ING1
	CXCL16	ING2
	PTPN12	INHBA
	BAK1	INHBC
	MARK4	INPP1
	KIAA1524	INPP4B
	PHF12	INPP5J
	ARHGAP23	IP6K2
	USP36	IRAK1
	USP35	IREB2
	PTK6	IRF1
	RPTOR	IRF5
	MIR506	IRF9
	MIR519A2	IRS1
	MIR519A1	IRX5
	BIRC6	ISG20
	MIR497	ITGA2
	MIR490	ITGA3
	MIR485	ITGA7
	MIR451A	ITGAL
	OVCAS1	ITGAX
	PTGIS	ITGB1BP1
	PTGER4	ITGB2
	PTGER3	ITGB4
	PTGER2	ITGB5
	PTGER1	ITGB8
	BAG1	ITGBL1
	PTGDR	ITIH4
	PTCH1	ITM2A
	PTAFR	ITPK1
	PSME1	ITPR1
	ZMIZ1	ITPR3
	SALL4	ITSN2
	PAK7	IVNS1ABP
	APMAP	JRKL
	PLSCR4	JUN
	PSMC4	KAL1
	CIAPIN1	KARS
	PSMB5	KATNA1
	C8orf4	KBTBD11
	MUC13	KBTBD2
	NPDC1	KCNAB2
	BCCIP	KCNJ15
	DIABLO	KCNJ3
	PSAP	KCNK1
	PRSS8	KCNK5
	PRSS2	KCNK9
	PRSS1	KCNN4
	LGMN	KCNQ2
	CTNNBL1	KCNS1
	TMX4	KCTD3
	PRLR	KCTD9
	PRL	KDELR3
	GSDMC	KDM4B
	PCDHB2	KDM5B
	PRKRIR	KHDRBS3
	EIF2AK2	KIAA0020
	MAP2K7	KIAA0090
	MAP2K2	KIAA0100
	MAPK10	KIAA0101
	MAPK7	KIAA0141
	ZMAT5	KIAA0195
	PRKG1	KIAA0232
	PRKDC	KIAA0649
	PRKCZ	KIAA0746
	UNC45A	KIAA0922
	ECHDC1	KIAA1217
	ACOT13	KIAA1324
	PKN1	KIAA1467
	UTP6	KIAA1967
	AXL	KIF11
	MBNL3	KIF16B
	PRKCA	KIF1B
	SAYSD1	KIF20A
	CHFR	KIF21A
	PRKAG1	KIF23
	MAP7D1	KIF2C
	PKIA	KIF3B
	PRKAB2	KIF3C
	PRKAB1	KIF5B
	PRKAA2	KIFC1
	PRKAA1	KIT
	PRIM2	KLF10
	PLXNA3	KLF4
	MAML3	KLF5
	CAMK2N1	KLF6
	RPL36AP40	KLF7
	ZNF331	KLF9
	MIR449A	KLHDC2
	MIR429	KLHL2
	MEG3	KLK10
	LAPTM4B	KLK12
	LOC553137	KLK13
	CCDC91	KLK3
	QRSL1	KLK5
	PSPC1	KLK6
	CASC1	KLK7
	THNSL2	KLK8
	PPP2R1A	KLRD1
	WRAP53	KRAS
	ATP5SL	KRT13
	SAMD4B	KRT14
	BANK1	KRT16
	PPP1CB	KRT17
	ACPP	KRT18
	PINX1	KRT19
	GEMIN8	KRT20
	OCIAD1	KRT23
	COMMD4	KRT5
	SOHLH2	KRT8
	RNF43	KRT81
	CWC25	KRT86
	DPP8	KYNU
	CNTLN	LAD1
	GIPC2	LAMA3
	XAF1	LAMA5
	PDP1	LAMB2
	MED1	LAMC2
	PPARA	LAMP2
	POU5F1B	LAMP3
	POU5F1	LANCL1
	UGT1A6	LAPTM5
	MIER2	LASP1
	DDX4	LASS2
	MIOS	LBR
	SLC38A2	LCK
	POLR2K	LCN2
	TERF2IP	LCP1
	WNT4	LDB2
	UNC93A	LDHB
	POLE	LDLR
	KCNK10	LDOC1
	PODXL	LEP
	TLR9	LEPR
	RAB4B	LFNG
	FGFRL1	LGALS1
	IL20RA	LGALS3BP
	FXYD5	LGALS4
	FXYD7	LGALS9
	PMS1	LILRA4
	PMP2	LILRB2
	PNOC	LILRB4
	PMAIP1	LILRB5
	PLXNB1	LIMA1
	PLXNA1	LIMCH1
	PLSCR1	LIMK1
	PLOD2	LIMK2
	PLOD1	LIN7A
	FXYD3	LIPA
	PLD2	LIPE
	LRP1B	LIPG
	PKM	LMO4
	PITX2	LOC220594
	PIK3R1	LOX
	PIK3CG	LPCAT1
	PHKG2	LPHN2
	ABCB4	LPIN1
	PGC	LPL
	CECR1	LPXN
	PENK	LRBA
	ERAP1	LRIG1
	HIGD1B	LRP1
	ARID4B	LRP10
	GHRL	LRP2
	UIMC1	LRPAP1
	ENPP2	LRRC17
	ZFR	LRRC32
	CUTA	LRWD1
	ARMCX3	LSM1
	PDGFA	LSM3
	HSD17B7	LSP1
	IP6K2	LTBR
	FAM8A1	LTF
	PRKAG2	LUM
	CRLF3	LY6D
	UCHL5	LY6E
	UBR5	LY75
	ZMYND10	LYAR
	WT1-AS	LYN
	ARMCX1	LYPLA1
	KCNK9	LYZ
	PHF20	LZTR1
	PIGP	M6PR
	LUZP4	MAD2L1
	CDKN2A-AS1	MADD
	LEF1	MAGOH
	ING4	MAGOHB
	PCNA	MAL2
	ADIPOR1	MAN1A2
	PCK2	MAN2C1
	DESI2	MAOA
	PBX1	MAP1B
	ASAP1	MAP2K2
	PAX2	MAP2K3
	PAM	MAP2K4
	CUZD1	MAP3K1
	ATP5B	MAP3K12
	PAK1	MAP3K14
	SERPINB2	MAP3K5
	PRDX1	MAP3K6
	PAEP	MAP3K8
	FURIN	MAPK10
	PEBP1	MAPK13
	P2RX7	MAPK6
	OR3A1	MAPK8
	MIR425	MAPRE2
	MIR423	MAPT
	MIR381	MARCO
	MIR378A	MAST2
	MIR375	MATK
	OAS3	MBD1
	OAS1	MBOAT7
	ROR1	MBTPS1
	NTRK1	MCCC1
	NSF	MCF2
	YBX1	MCM2
	ACR	MCM4
	NRF1	MCM5
	NPM1	MCM6
	NOTCH4	MCM7
	NOTCH1	MDM2
	NME1	MDM4
	ATP1B2	MED1
	NGF	MED13L
	NFKBIB	MED15
	NFKBIA	MED24
	NFKB2	MEF2A
	NFKB1	MEF2C
	NFE2L2	MEFV
	ATP1A3	MEIS2
	NEK3	MEIS3
	NEK2	MELK
	NEDD9	MEST
	NDUFS3	MET
	NDUFC2	MFAP2
	ACLY	MFAP4
	NDN	MFAP5
	NCAM1	MFGE8
	CEACAM6	MFNG
	NASP	MGAT4A
	NAP1L1	MGC42105
	ATF3	MGLL
	NAB1	MGST1
	ATF1	MICA
	MYO6	MID1
	GADD45B	MIF
	MYD88	MINK1
	MYCN	MIPEP
	MYCL	MKI67
	MX1	MKNK2
	MUC3A	MLANA
	TRNY	MLLT10
	TRNW	MLLT11
	TRNS1	MLLT3
	TRNR	MLLT4
	TRNK	MLLT6
	TRNG	MME
	TRND	MMP1
	TRNA	MMP12
	MTR	MMP13
	ND2	MMP14
	MTHFD1	MMP15
	COX3	MMP19
	COX2	MMP2
	COX1	MMP7
	TRNC	MMP9
	ATP8	MN1
	ATP6	MNAT1
	MTAP	MORF4L2
	MT1E	MPDU1
	MSX1	MPDZ
	MSR1	MPHOSPH6
	MSN	MPI
	MSMB	MPO
	ASS1	MPP2
	MSH4	MPZL1
	MIR369	MRAS
	MIR376C	MRC1
	MIR335	MRE11A
	MIR302B	MRPL11
	GPR179	MRPL37
	ASNS	MRPS26
	MS	MRPS27
	ASNA1	MRPS30
	KLK14	MS4A1
	MRE11A	MSH2
	MPI	MSH6
	MPG	MSLN
	CD200	MSN
	MMP15	MSX2
	MMP13	MT1G
	MMP12	MT2A
	MMP8	MTA1
	MLLT4	MTCH2
	MAP3K11	MTF2
	MIF	MTHFD1
	ASAH1	MTHFD2
	CD99	MTHFR
	CIITA	MTIF2
	SCGB2A2	MTL5
	SCGB2A1	MTMR15
	MET	MTMR2
	MEOX1	MTR
	MAP3K5	MTRF1L
	MAP3K4	MTSS1
	MDK	MTX1
	CD46	MUC1
	MCM7	MUT
	MCM6	MVP
	MCM5	MX1
	MCM3	MX2
	MCL1	MXI1
	MCC	MYBL1
	ARSE	MYBL2
	MATN2	MYC
	MAL	MYCBP
	MAGEA4	MYCN
	SMAD6	MYD88
	SMAD3	MYH9
	MIR99A	MYL3
	MIR98	MYL6
	MIR96	MYLIP
	MIR9-3	MYO3A
	MIR93	MYO5B
	MIR92A1	MYO6
	MIR9-2	MYO9A
	MIR7-3	MYOD1
	MIR7-2	MYOF
	MIR7-1	MYRIP
	MIR34C	MYT1
	MIR320A	NAGA
	MIR31	NAMPT
	MIR30E	NAP1L1
	MIR30A	NARF
	MIR29B2	NARG2
	MIR29B1	NASP
	MIR29A	NAT1
	MIR26B	NAT2
	MIR26A1	NAV1
	MIR25	NBEA
	MIR23B	NBL1
	MIR223	NBN
	MIR22	NBPF14
	TACSTD2	NCAPD2
	MIR217	NCAPD3
	MIR216A	NCDN
	MIR214	NCF2
	MIR212	NCK1
	MIR210	NCKAP1L
	MIR200B	NCL
	MIR20A	NCOA3
	MIR19A	NCOA6
	MIR199B	NDC80
	MIR199A2	NDRG1
	MIR199A1	NDRG2
	MIR198	NDUFA4
	MIR197	NDUFA7
	MIR195	NDUFA9
	MIR193A	NDUFB1
	MIR188	NDUFS1
	MIR183	NEBL
	MIR182	NEDD4L
	MIR181B1	NEK2
	MIR17	NEK4
	MIR15A	NEK9
	MIR155	NELL2
	MIR154	NF2
	MIR152	NFATC1
	MIR150	NFATC3
	MIR149	NFATC4
	MIR148A	NFE2L3
	MIR144	NFIB
	MIR143	NFIC
	MIR141	NFIL3
	MIR135A1	NFIX
	MIR133A1	NFKBIE
	MIR132	NGF
	MIR130B	NLRP2
	MIR130A	NMB
	MIR128-2	NME3
	MIR128-1	NMI
	MIR125B2	NMT2
	MIR106B	NMU
	MIR106A	NOB1
	MIR101-2	NOC4L
	MIR101-1	NOLC1
	MIR100	NOS3
	MIRLET7I	NOVA1
	MIRLET7F2	NPDC1
	MIRLET7F1	NPR1
	MIRLET7A2	NPR3
	MIRLET7A1	NPTN
	LTF	NPTX1
	LTC4S	NPY1R
	LSP1	NQO1
	LRMP	NR3C1
	L1RE1	NR4A1
	LOXL1	NRAS
	LOX	NRG1
	VWA5A	NRIP1
	HAGLR	NRP2
	LMX1B	NSF
	LINC00938	NT5C
	LINC01002	NTN4
	LIMK1	NTRK2
	LIG4	NTRK3
	LIG3	NUAK2
	LIG1	NUDCD1
	LIF	NUDT1
	ARHGDIB	NUDT2
	LGALS7	NUFIP2
	LGALS3BP	NUMA1
	LGALS3	NUMBL
	LEP	NUP155
	STMN1	NUP160
	LAMP1	NUP205
	LAMC1	NUSAP1
	LAMA2	NUTF2
	LIN28B	OAS2
	VGLL3	OGG1
	RHOC	OGN
	KRT19	OGT
	SKIDA1	OLFM1
	C10orf113	OMD
	KRT17	ORC6L
	RHOA	ORM1
	KRT13	OSBP
	KRT10	OSBPL3
	KRT4	OSBPL7
	KRASP1	OSGIN1
	KPNA3	OTUB1
	KIFC1	OVOL2
	KIF11	OXCT1
	KLK1	P2RX4
	KIR2DL2	P2RY6
	KCNMA1	P4HB
	KCNK2	P4HTM
	KCNH1	PACSIN3
	GUSBP4	PADI2
	KCNG1	PAK1IP1
	MAST4	PALLD
	DNAJB13	PALM
	JUND	PALM2
	JAK3	PANK3
	JAK2	PAQR3
	JAG2	PARD3
	EIF6	PARK7
	ITGB4	PARP14
	ITGAV	PARVB
	ITGAE	PATZ1
	IRS1	PAX5
	IRF7	PBK
	AQP9	PBOV1
	ITGA6	PBX1
	IRAK1	PCBP1
	INS	PCBP2
	INHBC	PCDH1
	INHBB	PCDH8
	INHBA	PCMTD2
	INHA	PCNA
	AQP5	PCOLCE2
	IMPA1	PCSK6
	ILF3	PCTK1
	IL16	PDCD10
	IL15	PDCD1LG2
	IL13	PDCD4
	IL7	PDE4B
	IL6ST	PDE6B
	IL6R	PDE8B
	IL4	PDGFB
	IL2	PDGFRB
	IL1R1	PDGFRL
	IL1B	PDHA1
	IKBKB	PDIA4
	IGFBP6	PDIA5
	IGFBP4	PDK3
	IGF2R	PDK4
	SLC10A5	PDLIM3
	MACC1	PDPK1
	IFNG	PDS5B
	ACTBL2	PDSS1
	IFIT1	PDXDC1
	IFI35	PDZK1
	IFI27	PEA15
	IFI16	PECAM1
	CFI	PECI
	TMEM173	PER2
	ID4	PES1
	ID2	PEX12
	ID1	PEX13
	LUZP2	PEX19
	HYAL1	PFDN2
	TNC	PFDN6
	APOA4	PFKL
	HUS1	PGAM2
	DNAJC4	PGF
	HSPD1	PGK1
	HSP90AB1	PGM1
	HSPA5	PGM3
	HSPA2	PGR
	HSPA1L	PHF15
	HSPA1A	PHGDH
	BIRC3	PHKG2
	HSD17B4	PHYH
	HSD11B2	PIGH
	HSD3B2	PIGT
	HSD3B1	PIK3CG
	HES1	PIK3R1
	HPN	PIM2
	HP	PIN1
	HOXD10	PIP
	HOXD3	PIP5K1B
	HOXB3	PIR
	HOXB1	PISD
	HOXA10	PITPNM1
	SLC29A2	PKM2
	HNF4A	PKMYT1
	NR4A1	PKNOX1
	HMOX1	PKP1
	HMGB1	PKP2
	HLCS	PLA2G10
	HLA-G	PLA2G16
	HLA-DRA	PLA2G4A
	HLA-DOB	PLA2G7
	HLA-DOA	PLAGL1
	ANXA11	PLAT
	HLA-DMA	PLAU
	HLA-B	PLAUR
	ACACA	PLCB2
	ANXA6	PLCG1
	NRG1	PLCG2
	SOCS7	PLD1
	HELLS	PLEK
	HDAC2	PLEKHG1
	ANXA3	PLG
	HBB	PLK1
	HAS2	PLK2
	HIST1H1B	PLK3
	GZMB	PLOD1
	NXPH1	PLP1
	GZMA	PLP2
	UBQLN1	PLSCR1
	GYPC	PLTP
	DNMT3L	PML
	PSMC3IP	PMVK
	STRN4	PNMA1
	ICOS	PNMT
	UQCR10	PNRC2
	CARD10	POLA2
	BLNK	POLB
	GTF2F2	POLD2
	GTF2A1	POLD4
	GSTZ1	POLE
	GSTM3	POLR2F
	GSTM2	POLR2L
	GSTA1	POM121
	GSK3A	POSTN
	GRPR	POU2AF1
	PDIA3	PPA1
	CXCL3	PPARG
	CXCL2	PPFIA1
	SLC25A5	PPIF
	ANKRD11	PPIL4
	BRD7	PPM1D
	DROSHA	PPP1R14C
	NR3C1	PPP1R15A
	ATAD2	PPP1R3E
	ANPEP	PPP2R1B
	HIPK2	PPP2R2B
	NOB1	PPP2R5A
	RGCC	PPP4C
	GRIA2	PPT1
	RAPGEF1	PRAME
	GPX4	PRC1
	GPX3	PRDX3
	TRIM59	PRDX4
	LCN12	PREX1
	LINC00636	PRIM2
	GPER1	PRKAA2
	TUSC7	PRKAB2
	DLL1	PRKACA
	ANGPT2	PRKAR1A
	RPL23AP82	PRKAR2B
	KLK9	PRKCB
	KCTD1	PRKCD
	C17orf78	PRKCG
	KCTD21	PRKCI
	H19	PRKG1
	XCR1	PRKX
	GPR4	PRLR
	SLCO1B3	PRNP
	GNRHR	PROCR
	GNA12	PROM1
	GMPR	PROS1
	AMT	PRPF18
	HTRA2	PRPF4B
	GLI1	PRR12
	TMEM97	PRRG1
	TOX3	PRRX2
	AMPH	PRSS23
	GCLC	PSAT1
	PDCD4	PSEN1
	CHMP2A	PSMA3
	SULT1C4	PSMA4
	GPC3	PSMB10
	DKK2	PSMB2
	DKK3	PSMB4
	TRAPPC3	PSMB5
	PELP1	PSMB6
	MLH3	PSMB8
	PABPC1	PSMB9
	GHSR	PSMC4
	GHR	PSMD10
	GGT1	PSMD12
	NUFIP1	PSMD2
	NAP1L5	PSMD7
	GDI1	PSME2
	MSTN	PSME4
	BSCL2	PSMG1
	GDF2	PSPH
	RGS17	PTBP2
	LATS2	PTDSS1
	AGO1	PTEN
	NUPR1	PTGDS
	GBGT1	PTGER4
	ERAL1	PTGIS
	FBXO5	PTGS1
	GATA4	PTGS2
	GATA3	PTN
	GMEB2	PTP4A2
	GAS1	PTPLA
	STEAP2	PTPN13
	PCDHB5	PTPRC
	GIMAP2	PTPRE
	IRF2BP1	PTPRF
	TES	PTPRG
	APPL1	PTPRJ
	FDCSP	PTPRM
	CLIP3	PTPRT
	AAR2	PTPRU
	GAPDH	PTS
	RWDD3	PTTG1
	CLIC4	PTX3
	ASPM	PUS1
	RCHY1	PVALB
	GALNT1	PWP1
	PART1	PWP2
	TEX40	PYCARD
	TNFAIP8	PYGM
	GAD1	QDPR
	GABRA6	QPCT
	XRCC6	QPRT
	IFI6	QSOX1
	SLC25A30	RAB11A
	FUT3	RAB11FIP1
	FUT1	RAB22A
	FUCA1	RAB26
	NR5A1	RAB27B
	ABL1	RAB2A
	FSHB	RAB31
	ALOX15B	RAB32
	IL27	RAB6B
	GAS2L2	RAB7A
	ALOX15	RAB7L1
	ALOX12B	RAB9A
	FJX1	RABIF
	PANX1	RAC2
	EML2	RAC3
	FRA6E	RAD21
	ALOX5	RAD23A
	ALK	RAD51
	GABARAPL1	RAD51C
	SLC7A11	RAD54L
	ZMYND8	RALB
	PHLDA3	RAMP1
	VSIG2	RAP1B
	PSD4	RARA
	PRAME	RARB
	HAAO	RARRES1
	CBX7	RARRES3
	PES1	RASA1
	ANGPTL2	RASGRP2
	SIK3	RASSF1
	SMG5	RB1
	SASH1	RBBP6
	TRIM2	RBBP7
	MGRN1	RBBP8
	FLT4	RBL2
	SIK2	RBMS1
	FLT3LG	RBP4
	SULF1	RBPMS
	ZC3H4	RCAN1
	FLOT2	RCAN2
	EPB41L3	RCC1
	PLXND1	RCN1
	FOXO3	RDX
	FOXO1	REPS2
	VWA8	RERG
	CLUAP1	REST
	ZHX3	REXO2
	FOXJ1	RFC3
	SPEN	RFC4
	FOXL1	RFTN1
	ALDOC	RGL1
	TPX2	RGL2
	ZNF365	RGS10
	DLGAP4	RGS16
	RNF44	RGS2
	ATF5	RGS5
	RRAS2	RHBDL2
	NID2	RHCG
	CASC3	RHEB
	FHL2	RHOBTB2
	FH	RHOBTB3
	FGR	RHOC
	FGFR4	RHOH
	FGFR3	RICS
	FGFR1	RIMS3
	MAPK15	RIOK3
	FGF9	RIPK2
	FGF8	RIT1
	FGF4	RLF
	SLC29A4	RNASE1
	FCN2	RNASE6
	FCGRT	RNASEH1
	ALDH3B1	RND3
	EFEMP1	RNF103
	ALDH1A3	RNF114
	FBLN2	RNF138
	FAU	RNPEP
	FBLN1	ROCK1
	FAP	ROPN1
	FANCG	ROR1
	PTK2B	RP6-213H19.1
	FAH	RPA3
	FANCE	RPL21
	FANCC	RPL23A
	FANCA	RPL31
	FABP5	RPL39L
	FABP4	RPL5
	F13A1	RPLP0
	ALDH1A1	RPLP1
	F5	RPN1
	F3	RPP38
	F2	RPS12
	EZH2	RPS14
	ALCAM	RPS16
	EYA2	RPS18
	ETV5	RPS4X
	ERCC6	RPS6KA4
	ERCC4	RPS6KB1
	EYA4	RPS6KC1
	EPS8	RRAGD
	EPHB2	RRAS2
	EPHB1	RRBP1
	EPAS1	RRM2
	EP300	RRM2B
	PRSS55	RSU1
	SLC29A1	RTCD1
	GAPT	RTN1
	ENG	RTN4
	AIM1	RUNX3
	CTTN	S100A1
	EMP2	S100A10
	TCTEX1D1	S100A11
	ELAVL1	S100A13
	SERPINB1	S100A14
	AIF1	S100A2
	EIF5A	S100A4
	EIF4EBP2	S100A6
	EIF4EBP1	S100A7
	EIF4E	S100A8
	LDHD	S100A9
	ARID2	S100B
	EGR2	S1PR1
	EGR1	SACS
	EFNB2	SAMD4A
	PLAC4	SAMHD1
	EEF1A1	SAR1A
	EDNRB	SART3
	E2F6	SASH1
	DUSP6	SATB1
	DUSP5	SC5DL
	DUSP3	SCAMP1
	DUSP1	SCAMP2
	HBEGF	SCAP
	AGT	SCARA3
	DRD2	SCD
	DPEP1	SCGB2A1
	DOK1	SCGB2A2
	DOCK1	SCGB3A1
	DNMT3A	SCHIP1
	TRDMT1	SCRG1
	DNASE1	SCUBE2
	AGER	SDC1
	DMWD	SDC2
	DMPK	SDC4
	DLX5	SDF2
	DLX4	SDHA
	AFP	SDHB
	AFM	SEC13
	DHFR	SEC14L2
	DCP2	SEC16A
	MIER3	SEC61G
	AES	SEC62
	LONRF2	SELE
	DAW1	SELENBP1
	CABP7	SELL
	DCN	SEMA3C
	LGI4	SEMA4D
	DAXX	SEMA5A
	TMEM30B	SEMA6A
	DAP	SEPHS1
	DACH1	SEPP1
	CYP27B1	2001-09-01
	CYP4B1	SERBP1
	CYP3A5	SERINC1
	FAM84B	SERINC2
	ANKRD46	SERPINA3
	CYP2C9	SERPINA5
	CYP2C8	SERPINA6
	AGR3	SERPINB5
	CYP3A7	SERPINB6
	CYP2A6	SERPINE1
	PRSS3P2	SERPINF1
	CYC1	SERPING1
	FAM218A	SERPINI1
	CNTN4	SERPINI2
	CTSS	SF3A3
	CTSO	SF3B14
	LRRC34	SFN
	CTSK	SFRP1
	ZNF385B	SFRP4
	PLB1	SFRS2
	CTBP2	SFRS3
	CSTB	SFRS4
	CCBE1	SFRS5
	WIPF2	SFRS7
	DHRS13	SFT2D2
	SLC47A2	SFXN4
	CSRP1	SGCB
	ZNF597	SGK1
	VCAN	SGK2
	CSNK1E	SGK3
	GSC	SH2B1
	RDH12	SH2B2
	CSK	SH2D2A
	CPNE8	SH3BGRL
	LYRM5	SH3BP1
	CSF3R	SH3BP4
	CSF2	SH3KBP1
	CSF1R	SHC1
	CSE1L	SHC2
	MAPK14	SHROOM3
	CTCFL	SIAH2
	S100A16	SIGMAR1
	CRP	SILV
	CRKL	SIRPB2
	CRK	SKP2
	CRIP1	SLA
	CRHR1	SLAMF7
	CRH	SLC11A1
	CREB1	SLC11A2
	CRAT	SLC15A3
	CRABP1	SLC16A1
	TMEM71	SLC16A2
	VPS37A	SLC16A3
	CLDN7	SLC16A5
	CPB2	SLC16A6
	ADORA2A	SLC17A1
	CMBL	SLC1A1
	SETD9	SLC22A18
	SPATA18	SLC26A2
	MAP3K8	SLC27A2
	OCIAD2	SLC2A1
	SLC31A2	SLC2A3
	SLC31A1	SLC2A5
	COL12A1	SLC2A6
	COL11A1	SLC34A2
	AADAC	SLC35B1
	COL1A1	SLC39A14
	LYPLAL1	SLC39A6
	ADH4	SLC3A2
	HSPB6	SLC40A1
	OVCA2	SLC43A1
	LTB4R	SLC45A1
	CCR7	SLC4A1
	SLAIN1	SLC4A7
	FAT3	SLC5A6
	SERPINA3	SLC6A14
	CLK2	SLC7A1
	CPXM2	SLC7A5
	CLIC1	SLC7A7
	CLU	SLC9A1
	TWIST2	SLC9A2
	LRG1	SLC9A3R1
	MRGPRF	SLPI
	CMTM5	SMA5
	CYYR1	SMAD2
	FAM210B	SMAD3
	RAB3C	SMAD4
	WDFY2	SMAD5
	ATG4A	SMAD7
	FBXO32	SMARCA2
	GNRHR2	SMARCC2
	CSMD3	SMC4
	CYGB	SMG7
	MAL2	SMN2
	NACC1	SMNDC1
	KLF8	SMOX
	SYNRG	SMPD1
	SAT2	SMS
	PRKCDBP	SMYD2
	GALNT6	SNAI1
	AKAP13	SNCA
	WIF1	SNCG
	CHI3L2	SNN
	CHI3L1	SNPH
	RABL2B	SNRK
	HHLA2	SNRPA1
	PLA2G16	SNRPB
	DMC1	SNRPD1
	POLR3A	SNRPD2
	DUSP14	SNRPE
	DDX52	SNRPG
	OGFR	SNTB2
	ADRM1	SNX1
	RIPK3	SOAT1
	RAB31	SOCS3
	COPS5	SOD1
	STIP1	SOD3
	MLLT11	SON
	BTG3	SORD
	PRDX3	SOX10
	GADD45G	SOX11
	BLCAP	SOX12
	PPARGC1A	SOX13
	PGRMC1	SOX4
	HPSE	SOX8
	PPP1R13L	SOX9
	CCR9	SPAG5
	2009-09-01	SPARC
	CYSLTR1	SPARCL1
	CFTR	SPDEF
	VAMP5	SPG7
	IQGAP2	SPIB
	PLK2	SPO11
	AHCYL1	SPOCK2
	NES	SPON1
	GIPC1	SPOP
	CHL1	SPP1
	MASP2	SRC
	MAP3K2	SRD5A1
	CFL1	SRD5A2
	SCGB1D2	SREBF1
	IGF2BP2	SREBF2
	IGF2BP3	SRP14
	IGF2BP1	SRPK1
	RAD51AP1	SRPR
	POSTN	SRPRB
	ARID3B	SRPX
	SPAG5	SSBP2
	SLCO1B1	SSH3
	IFITM2	SSR1
	CENPA	SSRP1
	SLC34A2	SSTR2
	CXCL13	ST14
	HTATIP2	ST6GAL1
	AGR2	ST7
	ARL6IP5	STAC
[truncated: 307 more rows]
