# Supplementary material for: Integrative analysis of common genes and driver mutations implicated in hormone stimulation for four cancers in women
Source: PeerJ. 2019 Jun 6;7:e6872. doi: 10.7717/peerj.6872 (PMC6556371; doi:10.7717/peerj.6872)
Supplement: Supplemental Information 6 — Gene sets that are involved in top mutually exclusive patterns identified for the TCGA data. [file peerj-07-6872-s006.xlsx]

## Sheet: Sheet1
Gene A	Gene B	Neither	A Not B	B Not A	Both	Log Odds Ratio	p-Value	Tendency
CCNE1	CDH1	5046	340	619	14	-1.092	<0.001	Mutual exclusivity
AKT1	CTNNB1	5546	280	189	4	-0.869	0.045	Mutual exclusivity
CDH1	EGFR	5180	618	206	15	-0.494	0.036	Mutual exclusivity
CDKN1B	ERBB2	4997	185	818	19	-0.466	0.029	Mutual exclusivity
CTNNB1	ERBB2	5005	177	821	16	-0.596	0.011	Mutual exclusivity
CDH1	GDF15	5243	625	143	8	-0.757	0.017	Mutual exclusivity
ERBB2	KRAS	4864	800	318	37	-0.346	0.027	Mutual exclusivity
AKT1	MYC	4475	238	1260	46	-0.376	0.011	Mutual exclusivity
CDH1	MYC	4161	552	1225	81	-0.696	<0.001	Mutual exclusivity
CTNNB1	MYC	4540	173	1286	20	-0.896	<0.001	Mutual exclusivity
AKT1	NDRG1	4656	244	1079	40	-0.346	0.025	Mutual exclusivity
CDH1	NDRG1	4348	552	1038	81	-0.487	<0.001	Mutual exclusivity
CTNNB1	NDRG1	4730	170	1096	23	-0.538	0.008	Mutual exclusivity
PTEN	NDRG1	4237	663	1017	102	-0.445	<0.001	Mutual exclusivity
AKT1	PTEN	4994	260	741	24	-0.475	0.014	Mutual exclusivity
ERBB2	PTEN	4459	795	723	42	-1.121	<0.001	Mutual exclusivity
MYC	PTEN	4057	1197	656	109	-0.574	<0.001	Mutual exclusivity
CCNE1	PTGS2	4958	323	707	31	-0.396	0.02	Mutual exclusivity
CDH1	SKP2	5192	622	194	11	-0.748	0.006	Mutual exclusivity
CDH1	TERT	5112	616	274	17	-0.664	0.003	Mutual exclusivity
CDH1	TGFB1	5304	631	82	2	-1.585	0.005	Mutual exclusivity
CDH1	TNF	5300	631	86	2	-1.633	0.003	Mutual exclusivity
CTNNB1	WT1	5656	192	170	1	-1.753	0.024	Mutual exclusivity
