# Supplementary material for: Integrative analysis of common genes and driver mutations implicated in hormone stimulation for four cancers in women
Source: PeerJ. 2019 Jun 6;7:e6872. doi: 10.7717/peerj.6872 (PMC6556371; doi:10.7717/peerj.6872)
Supplement: Supplemental Information 8 — The functional analysis were conducted using the Toppfun online tool. The results provide the gene ontology term and the role of the genes. [file peerj-07-6872-s008.xlsx]

## Sheet: Sheet1
Category	ID	Name	p-value	q-value Bonferroni	q-value FDR B&H	q-value FDR B&Y	Hit Count in Query List	Hit in Query List
GO: Biological Process	GO:0042127	regulation of cell proliferation	5.35e-32	2.08e-28	2.08e-28	1.84e-27	40	TGFB1,MYC,CDKN1B,CDKN2A,KRAS,ERBB2,PTTG1,SERPINB5,SPARC,IGF2,NDRG1,IGFBP3,BRCA1,BRAF,CYR61,EGFR,TIMP1,ESR1,ESR2,CD44,WT1,APC,AKT1,BCL2,TNF,FGFR2,CTNNB1,MMP9,RUNX3,PTEN,MDM2,MMP12,EZH2,SKP2,TERT,CDH1,PTGS2,PGR,DNMT1,CDK6
GO: Biological Process	GO:0043067	regulation of programmed cell death	2.44e-30	9.48e-27	4.74e-27	4.19e-26	38	TGFB1,MYC,CDKN1B,CDKN2A,KRAS,MET,ERBB2,NDRG1,IGFBP3,BRCA1,BRAF,CYR61,EGFR,TIMP1,TIMP3,SPP1,GDF15,ESR1,ESR2,CD44,WT1,APC,AKT1,BCL2,TNF,MSH2,FGFR2,MMP2,CTNNB1,MMP9,RUNX3,PTEN,MDM2,SKP2,TERT,CDH1,PTGS2,PGR
GO: Biological Process	GO:0010941	regulation of cell death	3.49e-29	1.36e-25	4.53e-26	4e-25	38	TGFB1,MYC,CDKN1B,CDKN2A,KRAS,MET,ERBB2,NDRG1,IGFBP3,BRCA1,BRAF,CYR61,EGFR,TIMP1,TIMP3,SPP1,GDF15,ESR1,ESR2,CD44,WT1,APC,AKT1,BCL2,TNF,MSH2,FGFR2,MMP2,CTNNB1,MMP9,RUNX3,PTEN,MDM2,SKP2,TERT,CDH1,PTGS2,PGR
GO: Biological Process	GO:0009719	response to endogenous stimulus	2.5e-28	9.72e-25	1.94e-25	1.72e-24	38	TGFB1,MYC,CCNE1,CDKN1B,CDKN2A,KRAS,SPARC,IGF2,BRCA1,BRAF,CYR61,EGFR,TIMP1,TIMP3,SPP1,GDF15,ESR1,ESR2,CD44,WT1,APC,AKT1,BCL2,TNF,FGFR2,MMP2,CTNNB1,RUNX3,PTEN,MDM2,EZH2,MMP14,SKP2,CDH1,SDC1,PTGS2,PGR,DNMT1
GO: Biological Process	GO:0012501	programmed cell death	1.74e-26	6.76e-23	9.65e-24	8.53e-23	38	TGFB1,MYC,CDKN1B,CDKN2A,KRAS,MET,ERBB2,NDRG1,IGFBP3,BRCA1,BRAF,CYR61,EGFR,TIMP1,TIMP3,SPP1,GDF15,ESR1,ESR2,CD44,WT1,APC,AKT1,BCL2,TNF,MSH2,FGFR2,MMP2,CTNNB1,MMP9,RUNX3,PTEN,MDM2,SKP2,TERT,CDH1,PTGS2,PGR
GO: Biological Process	GO:0042981	regulation of apoptotic process	4.72e-29	1.84e-25	4.59e-26	4.06e-25	37	TGFB1,MYC,CDKN1B,CDKN2A,KRAS,ERBB2,NDRG1,IGFBP3,BRCA1,BRAF,CYR61,EGFR,TIMP1,TIMP3,SPP1,GDF15,ESR1,ESR2,CD44,WT1,APC,AKT1,BCL2,TNF,MSH2,FGFR2,MMP2,CTNNB1,MMP9,RUNX3,PTEN,MDM2,SKP2,TERT,CDH1,PTGS2,PGR
GO: Biological Process	GO:0006915	apoptotic process	2.26e-25	8.77e-22	1.1e-22	9.69e-22	37	TGFB1,MYC,CDKN1B,CDKN2A,KRAS,ERBB2,NDRG1,IGFBP3,BRCA1,BRAF,CYR61,EGFR,TIMP1,TIMP3,SPP1,GDF15,ESR1,ESR2,CD44,WT1,APC,AKT1,BCL2,TNF,MSH2,FGFR2,MMP2,CTNNB1,MMP9,RUNX3,PTEN,MDM2,SKP2,TERT,CDH1,PTGS2,PGR
GO: Biological Process	GO:0006928	movement of cell or subcellular component	2.2e-24	8.55e-21	6.11e-22	5.4e-21	36	TGFB1,MYC,CDKN1B,KRAS,MET,ERBB2,SERPINB5,SPARC,IGFBP3,BRAF,CYR61,EGFR,TIMP1,SPP1,ESR2,CD44,WT1,APC,AKT1,BCL2,TNF,MMP1,MMP2,CTNNB1,MMP9,RUNX3,PTEN,MDM2,MMP12,MMP14,TERT,CDH1,SDC1,PTGS2,PGR,CDK6
GO: Biological Process	GO:0040011	locomotion	5.36e-23	2.08e-19	1.16e-20	1.02e-19	34	TGFB1,MYC,KRAS,MET,ERBB2,SPARC,IGFBP3,BRAF,CYR61,EGFR,TIMP1,SPP1,ESR2,CD44,WT1,APC,AKT1,BCL2,TNF,MMP1,MMP2,CTNNB1,MMP9,RUNX3,PTEN,MDM2,MMP12,MMP14,TERT,CDH1,SDC1,PTGS2,PGR,CDK6
GO: Biological Process	GO:0051674	localization of cell	2.01e-24	7.82e-21	6.02e-22	5.32e-21	33	TGFB1,MYC,KRAS,MET,ERBB2,SPARC,IGFBP3,BRAF,CYR61,EGFR,TIMP1,SPP1,ESR2,CD44,WT1,APC,AKT1,BCL2,TNF,MMP1,MMP2,CTNNB1,MMP9,PTEN,MDM2,MMP12,MMP14,TERT,CDH1,SDC1,PTGS2,PGR,CDK6
GO: Biological Process	GO:0048870	cell motility	2.01e-24	7.82e-21	6.02e-22	5.32e-21	33	TGFB1,MYC,KRAS,MET,ERBB2,SPARC,IGFBP3,BRAF,CYR61,EGFR,TIMP1,SPP1,ESR2,CD44,WT1,APC,AKT1,BCL2,TNF,MMP1,MMP2,CTNNB1,MMP9,PTEN,MDM2,MMP12,MMP14,TERT,CDH1,SDC1,PTGS2,PGR,CDK6
GO: Biological Process	GO:0014070	response to organic cyclic compound	2.53e-27	9.81e-24	1.64e-24	1.45e-23	32	TGFB1,CCNE1,CDKN1B,CDKN2A,KRAS,SPARC,IGF2,BRCA1,BRAF,EGFR,TIMP3,SPP1,ESR1,ESR2,WT1,AKT1,BCL2,TNF,MMP2,CTNNB1,PTEN,MDM2,MMP12,EZH2,MMP14,SKP2,TERT,CDH1,SDC1,PTGS2,PGR,DNMT1
GO: Biological Process	GO:0031399	regulation of protein modification process	9.42e-20	3.66e-16	1.02e-17	8.99e-17	32	TGFB1,MYC,CCNE1,CDKN1B,CDKN2A,KRAS,MET,ERBB2,IGF2,IGFBP3,BRCA1,BRAF,CYR61,EGFR,TIMP3,GDF15,RASSF1,ESR1,ESR2,CD44,APC,AKT1,BCL2,TNF,FGFR2,CTNNB1,MMP9,PTEN,EZH2,SKP2,TERT,DNMT1
GO: Biological Process	GO:0051247	positive regulation of protein metabolic process	2.71e-20	1.05e-16	3.63e-18	3.21e-17	31	TGFB1,MYC,CDKN1B,CDKN2A,KRAS,MET,ERBB2,IGF2,IGFBP3,BRCA1,BRAF,CYR61,EGFR,GDF15,RASSF1,ESR1,ESR2,CD44,APC,AKT1,BCL2,TNF,FGFR2,CTNNB1,MMP9,PTEN,MDM2,EZH2,MMP14,SKP2,DNMT1
GO: Biological Process	GO:0016477	cell migration	9.11e-22	3.54e-18	1.48e-19	1.3e-18	30	TGFB1,MYC,KRAS,MET,SPARC,IGFBP3,BRAF,CYR61,EGFR,TIMP1,SPP1,ESR2,CD44,APC,AKT1,BCL2,TNF,MMP1,MMP2,CTNNB1,MMP9,PTEN,MDM2,MMP12,MMP14,TERT,CDH1,SDC1,PTGS2,PGR
GO: Biological Process	GO:0022414	reproductive process	5.77e-20	2.24e-16	6.8e-18	6.01e-17	30	TGFB1,CCNE1,CDKN1B,MET,ERBB2,PTTG1,SERPINB5,IGF2,CYR61,EGFR,TIMP1,SPP1,ESR1,ESR2,CD44,WT1,APC,AKT1,BCL2,MSH2,FGFR2,MMP2,CTNNB1,MMP9,PTEN,MMP14,CDH1,SDC1,PTGS2,PGR
GO: Biological Process	GO:0000003	reproduction	5.99e-20	2.33e-16	6.85e-18	6.06e-17	30	TGFB1,CCNE1,CDKN1B,MET,ERBB2,PTTG1,SERPINB5,IGF2,CYR61,EGFR,TIMP1,SPP1,ESR1,ESR2,CD44,WT1,APC,AKT1,BCL2,MSH2,FGFR2,MMP2,CTNNB1,MMP9,PTEN,MMP14,CDH1,SDC1,PTGS2,PGR
GO: Biological Process	GO:0032270	positive regulation of cellular protein metabolic process	6.84e-20	2.66e-16	7.59e-18	6.71e-17	30	TGFB1,MYC,CDKN1B,CDKN2A,KRAS,MET,ERBB2,IGF2,IGFBP3,BRCA1,BRAF,CYR61,EGFR,GDF15,RASSF1,ESR1,ESR2,CD44,AKT1,BCL2,TNF,FGFR2,CTNNB1,MMP9,PTEN,MDM2,EZH2,MMP14,SKP2,DNMT1
GO: Biological Process	GO:1901700	response to oxygen-containing compound	4.35e-19	1.69e-15	4.12e-17	3.65e-16	30	TGFB1,CCNE1,CDKN1B,CDKN2A,MET,SPARC,IGF2,BRCA1,BRAF,EGFR,TIMP1,TIMP3,SPP1,ESR1,ESR2,WT1,APC,AKT1,BCL2,TNF,MMP2,CTNNB1,PTEN,MDM2,EZH2,CDH1,SDC1,PTGS2,PGR,DNMT1
GO: Biological Process	GO:2000026	regulation of multicellular organismal development	3.81e-17	1.48e-13	2.47e-15	2.18e-14	30	TGFB1,MYC,CDKN1B,CDKN2A,MET,ERBB2,SPARC,BRCA1,BRAF,CYR61,TIMP1,SPP1,ESR1,CD44,WT1,APC,AKT1,BCL2,TNF,FGFR2,CTNNB1,MMP9,PTEN,MDM2,EZH2,MMP14,TERT,CDH1,PTGS2,CDK6
GO: Molecular Function	GO:0019899	enzyme binding	7.03e-16	2.68e-13	2.68e-13	1.75e-12	29	TGFB1,MYC,CCNE1,CDKN1B,CDKN2A,MET,ERBB2,NDRG1,BRCA1,BRAF,EGFR,TIMP1,TIMP3,ESR1,ESR2,CD44,APC,AKT1,BCL2,TNF,MSH2,CTNNB1,RUNX3,PTEN,MDM2,CDH1,PTGS2,PGR,DNMT1
GO: Biological Process	GO:0009725	response to hormone	2.67e-23	1.04e-19	6.11e-21	5.4e-20	29	TGFB1,CCNE1,CDKN1B,KRAS,SPARC,IGF2,BRCA1,BRAF,EGFR,TIMP1,TIMP3,SPP1,ESR1,ESR2,WT1,AKT1,BCL2,TNF,MMP2,CTNNB1,PTEN,MDM2,EZH2,MMP14,SKP2,SDC1,PTGS2,PGR,DNMT1
GO: Biological Process	GO:0010647	positive regulation of cell communication	1.93e-17	7.51e-14	1.34e-15	1.19e-14	29	TGFB1,MYC,CDKN2A,KRAS,MET,ERBB2,IGF2,IGFBP3,BRAF,CYR61,EGFR,TIMP3,GDF15,ESR1,ESR2,KIAA1324,CD44,AKT1,BCL2,TNF,FGFR2,CTNNB1,MMP9,RUNX3,PTEN,EZH2,SKP2,TERT,PTGS2
GO: Biological Process	GO:0006468	protein phosphorylation	1.02e-15	3.95e-12	4.73e-14	4.18e-13	29	TGFB1,MYC,CCNE1,CDKN1B,CDKN2A,KRAS,MET,ERBB2,IGF2,IGFBP3,BRAF,CYR61,EGFR,TIMP3,GDF15,ESR1,ESR2,CD44,APC,AKT1,BCL2,TNF,FGFR2,CTNNB1,MMP9,RUNX3,PTEN,EZH2,CDK6
GO: Biological Process	GO:1901698	response to nitrogen compound	1.4e-22	5.44e-19	2.86e-20	2.53e-19	28	TGFB1,MYC,CCNE1,CDKN1B,CDKN2A,SPARC,IGF2,BRCA1,BRAF,EGFR,TIMP1,TIMP3,ESR1,WT1,AKT1,BCL2,TNF,MMP2,CTNNB1,PTEN,MDM2,EZH2,TERT,CDH1,SDC1,PTGS2,PGR,DNMT1
GO: Biological Process	GO:0051726	regulation of cell cycle	2.92e-22	1.14e-18	5.4e-20	4.78e-19	28	TGFB1,MYC,CCNE1,CDKN1B,CDKN2A,MET,PTTG1,IGF2,NDRG1,BRCA1,EGFR,RASSF1,ESR1,APC,AKT1,BCL2,TNF,MSH2,FGFR2,CTNNB1,RUNX3,PTEN,MDM2,EZH2,SKP2,TERT,PTGS2,CDK6
GO: Biological Process	GO:0060429	epithelium development	2.47e-19	9.6e-16	2.4e-17	2.12e-16	28	TGFB1,MYC,CDKN2A,KRAS,MET,SERPINB5,CYR61,EGFR,ESR1,ESR2,CD44,WT1,APC,AKT1,BCL2,TNF,FGFR2,MMP2,CTNNB1,RUNX3,MMP12,EZH2,MMP14,CDH1,SDC1,PTGS2,PGR,CDK6
GO: Biological Process	GO:0009967	positive regulation of signal transduction	9.5e-18	3.69e-14	7.1e-16	6.28e-15	28	TGFB1,MYC,CDKN2A,KRAS,MET,ERBB2,IGF2,IGFBP3,BRAF,CYR61,EGFR,TIMP3,GDF15,ESR1,ESR2,CD44,AKT1,BCL2,TNF,FGFR2,CTNNB1,MMP9,RUNX3,PTEN,EZH2,SKP2,TERT,PTGS2
GO: Biological Process	GO:0023056	positive regulation of signaling	1.71e-16	6.63e-13	1.02e-14	9.02e-14	28	TGFB1,MYC,CDKN2A,KRAS,MET,ERBB2,IGF2,IGFBP3,BRAF,CYR61,EGFR,TIMP3,GDF15,ESR1,ESR2,CD44,AKT1,BCL2,TNF,FGFR2,CTNNB1,MMP9,RUNX3,PTEN,EZH2,SKP2,TERT,PTGS2
GO: Biological Process	GO:0045595	regulation of cell differentiation	3.02e-16	1.17e-12	1.57e-14	1.38e-13	28	TGFB1,MYC,CCNE1,CDKN2A,KRAS,MET,ERBB2,IGFBP3,BRAF,CYR61,SPP1,GDF15,CD44,APC,AKT1,BCL2,TNF,FGFR2,CTNNB1,RUNX3,PTEN,MDM2,EZH2,MMP14,TERT,CDH1,PTGS2,CDK6
GO: Biological Process	GO:0007049	cell cycle	8.22e-16	3.19e-12	3.99e-14	3.53e-13	28	TGFB1,MYC,CCNE1,CDKN1B,CDKN2A,MET,PTTG1,IGF2,NDRG1,BRCA1,EGFR,RASSF1,ESR1,APC,AKT1,BCL2,TNF,MSH2,FGFR2,CTNNB1,RUNX3,PTEN,MDM2,EZH2,SKP2,TERT,PTGS2,CDK6
GO: Biological Process	GO:1902531	regulation of intracellular signal transduction	1.02e-15	3.97e-12	4.73e-14	4.18e-13	28	TGFB1,MYC,CDKN2A,KRAS,MET,ERBB2,IGF2,IGFBP3,BRCA1,BRAF,CYR61,EGFR,TIMP3,GDF15,ESR1,ESR2,CD44,APC,AKT1,BCL2,TNF,FGFR2,CTNNB1,MMP9,PTEN,MDM2,EZH2,PTGS2
GO: Biological Process	GO:0010628	positive regulation of gene expression	4.7e-15	1.83e-11	1.96e-13	1.74e-12	28	TGFB1,MYC,CCNE1,CDKN2A,KRAS,MET,ERBB2,IGF2,BRCA1,BRAF,CYR61,EGFR,ESR1,ESR2,CD44,WT1,AKT1,TNF,FGFR2,CTNNB1,RUNX3,PTEN,MDM2,TERT,CDH1,PGR,DNMT1,CDK6
GO: Biological Process	GO:0060548	negative regulation of cell death	4.91e-21	1.91e-17	7.34e-19	6.49e-18	27	MYC,CDKN1B,KRAS,MET,ERBB2,BRCA1,BRAF,CYR61,EGFR,TIMP1,SPP1,ESR1,ESR2,CD44,WT1,APC,AKT1,BCL2,TNF,MSH2,FGFR2,CTNNB1,MMP9,PTEN,MDM2,TERT,PGR
GO: Biological Process	GO:0031401	positive regulation of protein modification process	9.99e-19	3.88e-15	8.82e-17	7.8e-16	27	TGFB1,CDKN1B,CDKN2A,KRAS,MET,ERBB2,IGF2,IGFBP3,BRCA1,BRAF,CYR61,EGFR,GDF15,RASSF1,ESR1,ESR2,CD44,AKT1,BCL2,TNF,FGFR2,CTNNB1,MMP9,PTEN,EZH2,SKP2,DNMT1
GO: Biological Process	GO:0001932	regulation of protein phosphorylation	2.9e-17	1.13e-13	1.94e-15	1.72e-14	27	TGFB1,MYC,CCNE1,CDKN1B,CDKN2A,KRAS,MET,ERBB2,IGF2,IGFBP3,BRAF,CYR61,EGFR,TIMP3,GDF15,ESR1,ESR2,CD44,APC,AKT1,BCL2,TNF,FGFR2,CTNNB1,MMP9,PTEN,EZH2
GO: Biological Process	GO:0042325	regulation of phosphorylation	1.81e-16	7.05e-13	1.06e-14	9.41e-14	27	TGFB1,MYC,CCNE1,CDKN1B,CDKN2A,KRAS,MET,ERBB2,IGF2,IGFBP3,BRAF,CYR61,EGFR,TIMP3,GDF15,ESR1,ESR2,CD44,APC,AKT1,BCL2,TNF,FGFR2,CTNNB1,MMP9,PTEN,EZH2
GO: Biological Process	GO:0019220	regulation of phosphate metabolic process	7.8e-15	3.03e-11	3.09e-13	2.73e-12	27	TGFB1,MYC,CCNE1,CDKN1B,CDKN2A,KRAS,MET,ERBB2,IGF2,IGFBP3,BRAF,CYR61,EGFR,TIMP3,GDF15,ESR1,ESR2,CD44,APC,AKT1,BCL2,TNF,FGFR2,CTNNB1,MMP9,PTEN,EZH2
GO: Biological Process	GO:0051174	regulation of phosphorus metabolic process	9.36e-15	3.64e-11	3.67e-13	3.25e-12	27	TGFB1,MYC,CCNE1,CDKN1B,CDKN2A,KRAS,MET,ERBB2,IGF2,IGFBP3,BRAF,CYR61,EGFR,TIMP3,GDF15,ESR1,ESR2,CD44,APC,AKT1,BCL2,TNF,FGFR2,CTNNB1,MMP9,PTEN,EZH2
GO: Biological Process	GO:0051270	regulation of cellular component movement	2.06e-21	8.02e-18	3.21e-19	2.84e-18	26	TGFB1,MYC,CDKN1B,MET,ERBB2,SPARC,IGFBP3,BRAF,CYR61,EGFR,TIMP1,APC,AKT1,BCL2,TNF,MMP1,MMP2,MMP9,PTEN,MDM2,MMP14,TERT,CDH1,PTGS2,PGR,CDK6
GO: Biological Process	GO:0033993	response to lipid	1.59e-19	6.17e-16	1.62e-17	1.44e-16	26	TGFB1,CCNE1,CDKN1B,KRAS,SPARC,IGF2,BRCA1,EGFR,TIMP3,SPP1,ESR1,ESR2,AKT1,BCL2,TNF,MMP2,CTNNB1,PTEN,MDM2,EZH2,MMP14,SKP2,SDC1,PTGS2,PGR,DNMT1
GO: Biological Process	GO:0009887	animal organ morphogenesis	1.53e-18	5.96e-15	1.32e-16	1.17e-15	26	TGFB1,MYC,CDKN2A,KRAS,MET,SERPINB5,IGF2,BRAF,CYR61,EGFR,ESR1,ESR2,CD44,WT1,APC,BCL2,TNF,FGFR2,MMP2,CTNNB1,PTEN,MDM2,MMP14,CDH1,SDC1,PGR
GO: Biological Process	GO:0022402	cell cycle process	2.71e-16	1.05e-12	1.48e-14	1.31e-13	26	TGFB1,MYC,CCNE1,CDKN1B,CDKN2A,MET,PTTG1,IGF2,NDRG1,BRCA1,EGFR,RASSF1,ESR1,APC,AKT1,BCL2,TNF,MSH2,FGFR2,CTNNB1,PTEN,MDM2,EZH2,SKP2,TERT,CDK6
GO: Biological Process	GO:0022008	neurogenesis	1.32e-14	5.13e-11	5.13e-13	4.54e-12	26	TGFB1,MYC,KRAS,MET,ERBB2,NDRG1,BRAF,EGFR,SPP1,ESR2,CD44,APC,AKT1,BCL2,FGFR2,MMP2,CTNNB1,RUNX3,PTEN,MDM2,EZH2,MMP14,TERT,CDH1,DNMT1,CDK6
GO: Biological Process	GO:0048545	response to steroid hormone	2.49e-24	9.66e-21	6.44e-22	5.69e-21	25	TGFB1,CCNE1,CDKN1B,KRAS,SPARC,IGF2,BRCA1,EGFR,TIMP3,SPP1,ESR1,ESR2,BCL2,TNF,MMP2,CTNNB1,PTEN,MDM2,EZH2,MMP14,SKP2,SDC1,PTGS2,PGR,DNMT1
GO: Biological Process	GO:0008285	negative regulation of cell proliferation	4.65e-22	1.81e-18	8.21e-20	7.26e-19	25	TGFB1,MYC,CDKN1B,CDKN2A,ERBB2,PTTG1,SPARC,NDRG1,IGFBP3,ESR1,ESR2,CD44,WT1,APC,BCL2,TNF,FGFR2,CTNNB1,MMP9,RUNX3,PTEN,TERT,CDH1,PTGS2,CDK6
GO: Biological Process	GO:0003006	developmental process involved in reproduction	7.46e-22	2.9e-18	1.26e-19	1.12e-18	25	TGFB1,CCNE1,CDKN1B,MET,SERPINB5,CYR61,EGFR,SPP1,ESR1,ESR2,CD44,WT1,APC,AKT1,BCL2,MSH2,FGFR2,MMP2,CTNNB1,PTEN,MMP14,CDH1,SDC1,PTGS2,PGR
GO: Biological Process	GO:2000145	regulation of cell motility	5.96e-21	2.32e-17	8.58e-19	7.59e-18	25	TGFB1,MYC,MET,ERBB2,SPARC,IGFBP3,BRAF,CYR61,EGFR,TIMP1,APC,AKT1,BCL2,TNF,MMP1,MMP2,MMP9,PTEN,MDM2,MMP14,TERT,CDH1,PTGS2,PGR,CDK6
GO: Biological Process	GO:0040012	regulation of locomotion	5.01e-20	1.95e-16	6.08e-18	5.38e-17	25	TGFB1,MYC,MET,ERBB2,SPARC,IGFBP3,BRAF,CYR61,EGFR,TIMP1,APC,AKT1,BCL2,TNF,MMP1,MMP2,MMP9,PTEN,MDM2,MMP14,TERT,CDH1,PTGS2,PGR,CDK6
GO: Biological Process	GO:0010243	response to organonitrogen compound	5.01e-20	1.95e-16	6.08e-18	5.38e-17	25	MYC,CCNE1,CDKN1B,CDKN2A,SPARC,IGF2,BRCA1,BRAF,EGFR,TIMP1,TIMP3,WT1,AKT1,BCL2,TNF,MMP2,CTNNB1,PTEN,MDM2,EZH2,CDH1,SDC1,PTGS2,PGR,DNMT1
GO: Biological Process	GO:0043069	negative regulation of programmed cell death	2.09e-19	8.12e-16	2.08e-17	1.84e-16	25	MYC,CDKN1B,KRAS,MET,ERBB2,BRCA1,BRAF,CYR61,EGFR,TIMP1,SPP1,CD44,WT1,APC,AKT1,BCL2,TNF,MSH2,FGFR2,CTNNB1,MMP9,PTEN,MDM2,TERT,PGR
GO: Biological Process	GO:0048585	negative regulation of response to stimulus	2.75e-14	1.07e-10	1.01e-12	8.91e-12	25	TGFB1,MYC,MET,IGF2,IGFBP3,BRCA1,EGFR,TIMP3,SPP1,ESR1,ESR2,CD44,APC,AKT1,BCL2,TNF,CTNNB1,MMP9,PTEN,MDM2,EZH2,MMP14,TERT,CDH1,CDK6
GO: Biological Process	GO:0044093	positive regulation of molecular function	4.03e-12	1.57e-08	1.09e-10	9.62e-10	25	TGFB1,MYC,CDKN1B,CDKN2A,KRAS,MET,ERBB2,IGF2,IGFBP3,BRAF,CYR61,EGFR,ESR1,ESR2,AKT1,BCL2,TNF,MSH2,FGFR2,CTNNB1,MMP9,PTEN,EZH2,MMP14,TERT
GO: Biological Process	GO:0051173	positive regulation of nitrogen compound metabolic process	7.27e-12	2.83e-08	1.87e-10	1.65e-09	25	TGFB1,MYC,CCNE1,CDKN2A,KRAS,MET,ERBB2,IGF2,IGFBP3,BRCA1,CYR61,EGFR,ESR1,ESR2,WT1,AKT1,TNF,FGFR2,CTNNB1,RUNX3,PTEN,TERT,CDH1,PTGS2,PGR
GO: Biological Process	GO:0048608	reproductive structure development	1.06e-24	4.12e-21	4.12e-22	3.65e-21	24	CCNE1,CDKN1B,MET,SERPINB5,CYR61,EGFR,SPP1,ESR1,ESR2,CD44,WT1,APC,AKT1,BCL2,MSH2,FGFR2,MMP2,CTNNB1,PTEN,MMP14,CDH1,SDC1,PTGS2,PGR
GO: Biological Process	GO:0061458	reproductive system development	1.29e-24	5.02e-21	4.56e-22	4.04e-21	24	CCNE1,CDKN1B,MET,SERPINB5,CYR61,EGFR,SPP1,ESR1,ESR2,CD44,WT1,APC,AKT1,BCL2,MSH2,FGFR2,MMP2,CTNNB1,PTEN,MMP14,CDH1,SDC1,PTGS2,PGR
GO: Biological Process	GO:0048732	gland development	2.93e-24	1.14e-20	7.11e-22	6.29e-21	24	TGFB1,CCNE1,CDKN1B,CDKN2A,MET,SERPINB5,IGF2,BRAF,EGFR,ESR1,ESR2,CD44,WT1,APC,AKT1,BCL2,TNF,FGFR2,MMP2,CTNNB1,PTEN,EZH2,CDH1,PGR
GO: Biological Process	GO:0043066	negative regulation of apoptotic process	2.6e-18	1.01e-14	2.15e-16	1.9e-15	24	MYC,CDKN1B,KRAS,ERBB2,BRCA1,BRAF,CYR61,EGFR,TIMP1,SPP1,CD44,WT1,APC,AKT1,BCL2,TNF,MSH2,FGFR2,CTNNB1,MMP9,PTEN,MDM2,TERT,PGR
GO: Biological Process	GO:0040007	growth	1.84e-16	7.13e-13	1.06e-14	9.41e-14	24	TGFB1,CCNE1,CDKN1B,CDKN2A,ERBB2,PTTG1,IGF2,IGFBP3,CYR61,EGFR,TIMP3,SPP1,ESR1,ESR2,CD44,WT1,AKT1,BCL2,TNF,FGFR2,CTNNB1,PTEN,EZH2,MMP14
GO: Biological Process	GO:0032269	negative regulation of cellular protein metabolic process	2.82e-16	1.1e-12	1.48e-14	1.31e-13	24	TGFB1,MYC,CDKN1B,CDKN2A,MET,PTTG1,SERPINB5,IGFBP3,BRCA1,EGFR,TIMP1,TIMP3,ESR1,CD44,WT1,APC,AKT1,TNF,CTNNB1,MMP9,PTEN,MDM2,CDH1,DNMT1
GO: Biological Process	GO:0051248	negative regulation of protein metabolic process	1.14e-15	4.41e-12	5.13e-14	4.54e-13	24	TGFB1,MYC,CDKN1B,CDKN2A,MET,PTTG1,SERPINB5,IGFBP3,BRCA1,EGFR,TIMP1,TIMP3,ESR1,CD44,WT1,APC,AKT1,TNF,CTNNB1,MMP9,PTEN,MDM2,CDH1,DNMT1
GO: Biological Process	GO:0009628	response to abiotic stimulus	2.1e-15	8.17e-12	9.39e-14	8.3e-13	24	TGFB1,MYC,CDKN1B,KRAS,SPARC,IGF2,NDRG1,BRCA1,BRAF,EGFR,TIMP3,ESR2,AKT1,BCL2,TNF,MSH2,MMP2,CTNNB1,PTEN,MDM2,MMP14,TERT,PTGS2,DNMT1
GO: Biological Process	GO:0071495	cellular response to endogenous stimulus	6.37e-15	2.48e-11	2.55e-13	2.26e-12	24	TGFB1,CCNE1,IGF2,BRCA1,CYR61,EGFR,GDF15,ESR1,ESR2,CD44,WT1,APC,AKT1,TNF,FGFR2,MMP2,CTNNB1,MDM2,EZH2,SKP2,CDH1,PTGS2,PGR,DNMT1
GO: Biological Process	GO:0051094	positive regulation of developmental process	1.38e-14	5.34e-11	5.29e-13	4.68e-12	24	TGFB1,MYC,CCNE1,CDKN2A,KRAS,MET,IGF2,IGFBP3,BRCA1,BRAF,CYR61,GDF15,WT1,APC,AKT1,BCL2,TNF,FGFR2,CTNNB1,MMP9,EZH2,MMP14,TERT,PTGS2
GO: Biological Process	GO:0048699	generation of neurons	3.26e-13	1.27e-09	1.05e-11	9.27e-11	24	TGFB1,MYC,KRAS,MET,ERBB2,BRAF,EGFR,SPP1,ESR2,CD44,APC,AKT1,BCL2,FGFR2,MMP2,CTNNB1,RUNX3,PTEN,MDM2,EZH2,TERT,CDH1,DNMT1,CDK6
GO: Biological Process	GO:0045935	positive regulation of nucleobase-containing compound metabolic process	1.62e-11	6.31e-08	3.99e-10	3.53e-09	24	TGFB1,MYC,CCNE1,CDKN2A,KRAS,MET,ERBB2,IGF2,IGFBP3,BRCA1,CYR61,EGFR,ESR1,ESR2,WT1,AKT1,TNF,FGFR2,CTNNB1,RUNX3,PTEN,TERT,CDH1,PGR
GO: Biological Process	GO:0031328	positive regulation of cellular biosynthetic process	4.43e-11	1.72e-07	1.06e-09	9.34e-09	24	TGFB1,MYC,CCNE1,CDKN2A,KRAS,MET,ERBB2,IGF2,BRCA1,CYR61,EGFR,ESR1,ESR2,WT1,AKT1,TNF,FGFR2,CTNNB1,RUNX3,PTEN,TERT,CDH1,PTGS2,PGR
GO: Biological Process	GO:0009891	positive regulation of biosynthetic process	6.69e-11	2.6e-07	1.56e-09	1.38e-08	24	TGFB1,MYC,CCNE1,CDKN2A,KRAS,MET,ERBB2,IGF2,BRCA1,CYR61,EGFR,ESR1,ESR2,WT1,AKT1,TNF,FGFR2,CTNNB1,RUNX3,PTEN,TERT,CDH1,PTGS2,PGR
GO: Biological Process	GO:0050673	epithelial cell proliferation	2.72e-25	1.06e-21	1.18e-22	1.04e-21	23	TGFB1,MYC,CDKN1B,CDKN2A,ERBB2,SERPINB5,SPARC,IGFBP3,EGFR,ESR1,ESR2,APC,AKT1,TNF,FGFR2,CTNNB1,RUNX3,PTEN,MMP12,MMP14,CDH1,PGR,CDK6
GO: Biological Process	GO:0030334	regulation of cell migration	5.45e-19	2.12e-15	5.05e-17	4.46e-16	23	TGFB1,MYC,MET,SPARC,IGFBP3,BRAF,CYR61,EGFR,TIMP1,APC,AKT1,BCL2,TNF,MMP1,MMP2,MMP9,PTEN,MDM2,MMP14,TERT,CDH1,PTGS2,PGR
GO: Biological Process	GO:0008284	positive regulation of cell proliferation	6.83e-17	2.65e-13	4.35e-15	3.85e-14	23	TGFB1,MYC,CDKN1B,KRAS,ERBB2,IGF2,CYR61,EGFR,TIMP1,ESR1,AKT1,BCL2,TNF,FGFR2,CTNNB1,PTEN,MDM2,MMP12,SKP2,TERT,PTGS2,PGR,CDK6
GO: Biological Process	GO:0042327	positive regulation of phosphorylation	4.07e-16	1.58e-12	2.05e-14	1.82e-13	23	TGFB1,MYC,CDKN1B,KRAS,MET,ERBB2,IGF2,IGFBP3,BRAF,CYR61,EGFR,GDF15,ESR1,ESR2,CD44,AKT1,BCL2,TNF,FGFR2,CTNNB1,MMP9,PTEN,EZH2
GO: Biological Process	GO:0000278	mitotic cell cycle	5.38e-16	2.09e-12	2.65e-14	2.34e-13	23	TGFB1,MYC,CCNE1,CDKN1B,CDKN2A,MET,PTTG1,IGF2,EGFR,ESR1,APC,AKT1,BCL2,TNF,MSH2,FGFR2,CTNNB1,PTEN,MDM2,EZH2,SKP2,TERT,CDK6
GO: Biological Process	GO:0010562	positive regulation of phosphorus metabolic process	4.93e-15	1.92e-11	2.02e-13	1.78e-12	23	TGFB1,MYC,CDKN1B,KRAS,MET,ERBB2,IGF2,IGFBP3,BRAF,CYR61,EGFR,GDF15,ESR1,ESR2,CD44,AKT1,BCL2,TNF,FGFR2,CTNNB1,MMP9,PTEN,EZH2
GO: Biological Process	GO:0045937	positive regulation of phosphate metabolic process	4.93e-15	1.92e-11	2.02e-13	1.78e-12	23	TGFB1,MYC,CDKN1B,KRAS,MET,ERBB2,IGF2,IGFBP3,BRAF,CYR61,EGFR,GDF15,ESR1,ESR2,CD44,AKT1,BCL2,TNF,FGFR2,CTNNB1,MMP9,PTEN,EZH2
GO: Biological Process	GO:0022603	regulation of anatomical structure morphogenesis	5.13e-15	1.99e-11	2.07e-13	1.83e-12	23	TGFB1,MYC,CDKN2A,MET,ERBB2,SPARC,BRCA1,BRAF,SPP1,GDF15,ESR1,WT1,APC,BCL2,TNF,FGFR2,CTNNB1,MMP9,PTEN,EZH2,TERT,CDH1,PTGS2
GO: Biological Process	GO:0023057	negative regulation of signaling	1.26e-13	4.88e-10	4.32e-12	3.82e-11	23	TGFB1,MYC,IGFBP3,BRCA1,BRAF,EGFR,TIMP3,ESR1,ESR2,CD44,APC,AKT1,BCL2,TNF,CTNNB1,MMP9,PTEN,MDM2,EZH2,MMP14,TERT,CDH1,PTGS2
GO: Biological Process	GO:0010648	negative regulation of cell communication	1.65e-13	6.41e-10	5.57e-12	4.92e-11	23	TGFB1,MYC,IGFBP3,BRCA1,BRAF,EGFR,TIMP3,ESR1,ESR2,CD44,APC,AKT1,BCL2,TNF,CTNNB1,MMP9,PTEN,MDM2,EZH2,MMP14,TERT,CDH1,PTGS2
GO: Biological Process	GO:1903508	positive regulation of nucleic acid-templated transcription	3.09e-12	1.2e-08	8.57e-11	7.58e-10	23	TGFB1,MYC,CCNE1,CDKN2A,KRAS,MET,ERBB2,IGF2,BRCA1,CYR61,EGFR,ESR1,ESR2,WT1,AKT1,TNF,FGFR2,CTNNB1,RUNX3,PTEN,TERT,CDH1,PGR
GO: Biological Process	GO:0045893	positive regulation of transcription, DNA-templated	3.09e-12	1.2e-08	8.57e-11	7.58e-10	23	TGFB1,MYC,CCNE1,CDKN2A,KRAS,MET,ERBB2,IGF2,BRCA1,CYR61,EGFR,ESR1,ESR2,WT1,AKT1,TNF,FGFR2,CTNNB1,RUNX3,PTEN,TERT,CDH1,PGR
GO: Biological Process	GO:1902680	positive regulation of RNA biosynthetic process	3.94e-12	1.53e-08	1.07e-10	9.46e-10	23	TGFB1,MYC,CCNE1,CDKN2A,KRAS,MET,ERBB2,IGF2,BRCA1,CYR61,EGFR,ESR1,ESR2,WT1,AKT1,TNF,FGFR2,CTNNB1,RUNX3,PTEN,TERT,CDH1,PGR
GO: Biological Process	GO:0043085	positive regulation of catalytic activity	6.84e-12	2.66e-08	1.81e-10	1.6e-09	23	TGFB1,MYC,CDKN1B,CDKN2A,KRAS,MET,ERBB2,IGF2,IGFBP3,BRAF,CYR61,EGFR,ESR1,AKT1,BCL2,TNF,MSH2,FGFR2,CTNNB1,PTEN,EZH2,MMP14,TERT
GO: Biological Process	GO:0051254	positive regulation of RNA metabolic process	7.3e-12	2.84e-08	1.87e-10	1.65e-09	23	TGFB1,MYC,CCNE1,CDKN2A,KRAS,MET,ERBB2,IGF2,BRCA1,CYR61,EGFR,ESR1,ESR2,WT1,AKT1,TNF,FGFR2,CTNNB1,RUNX3,PTEN,TERT,CDH1,PGR
GO: Biological Process	GO:0051240	positive regulation of multicellular organismal process	9.08e-12	3.53e-08	2.28e-10	2.01e-09	23	TGFB1,MYC,CDKN2A,MET,SPARC,IGF2,BRCA1,BRAF,CYR61,EGFR,SPP1,ESR2,WT1,AKT1,BCL2,TNF,FGFR2,CTNNB1,MMP9,EZH2,MMP14,TERT,PTGS2
GO: Biological Process	GO:0010557	positive regulation of macromolecule biosynthetic process	6.8e-11	2.64e-07	1.57e-09	1.39e-08	23	TGFB1,MYC,CCNE1,CDKN2A,KRAS,MET,ERBB2,IGF2,BRCA1,CYR61,EGFR,ESR1,ESR2,WT1,AKT1,TNF,FGFR2,CTNNB1,RUNX3,PTEN,TERT,CDH1,PGR
GO: Molecular Function	GO:0044877	macromolecular complex binding	8.77e-11	3.34e-08	1.67e-08	1.09e-07	22	MYC,CCNE1,CDKN1B,KRAS,MET,PTTG1,SPARC,IGF2,NDRG1,BRCA1,CYR61,EGFR,ESR1,CD44,APC,MSH2,CTNNB1,MMP9,PTEN,EZH2,MMP14,DNMT1
GO: Biological Process	GO:0010564	regulation of cell cycle process	1.05e-19	4.09e-16	1.11e-17	9.78e-17	22	TGFB1,CDKN1B,CDKN2A,MET,PTTG1,IGF2,NDRG1,BRCA1,EGFR,RASSF1,ESR1,APC,AKT1,BCL2,TNF,MSH2,FGFR2,CTNNB1,PTEN,MDM2,EZH2,TERT
GO: Biological Process	GO:0043408	regulation of MAPK cascade	8.52e-18	3.31e-14	6.49e-16	5.74e-15	22	TGFB1,MYC,KRAS,MET,ERBB2,IGF2,IGFBP3,BRAF,CYR61,EGFR,TIMP3,GDF15,ESR1,ESR2,CD44,APC,AKT1,TNF,FGFR2,CTNNB1,PTEN,EZH2
GO: Biological Process	GO:0048729	tissue morphogenesis	1.83e-17	7.09e-14	1.29e-15	1.14e-14	22	TGFB1,MYC,KRAS,MET,SERPINB5,CYR61,EGFR,ESR1,ESR2,CD44,WT1,BCL2,TNF,FGFR2,MMP2,CTNNB1,RUNX3,MDM2,MMP12,MMP14,CDH1,PGR
GO: Biological Process	GO:0000165	MAPK cascade	1.13e-15	4.38e-12	5.13e-14	4.54e-13	22	TGFB1,MYC,KRAS,MET,ERBB2,IGF2,IGFBP3,BRAF,CYR61,EGFR,TIMP3,GDF15,ESR1,ESR2,CD44,APC,AKT1,TNF,FGFR2,CTNNB1,PTEN,EZH2
GO: Biological Process	GO:0001934	positive regulation of protein phosphorylation	2.23e-15	8.66e-12	9.84e-14	8.7e-13	22	TGFB1,CDKN1B,KRAS,MET,ERBB2,IGF2,IGFBP3,BRAF,CYR61,EGFR,GDF15,ESR1,ESR2,CD44,AKT1,BCL2,TNF,FGFR2,CTNNB1,MMP9,PTEN,EZH2
GO: Biological Process	GO:0023014	signal transduction by protein phosphorylation	2.38e-15	9.24e-12	1.03e-13	9.08e-13	22	TGFB1,MYC,KRAS,MET,ERBB2,IGF2,IGFBP3,BRAF,CYR61,EGFR,TIMP3,GDF15,ESR1,ESR2,CD44,APC,AKT1,TNF,FGFR2,CTNNB1,PTEN,EZH2
GO: Biological Process	GO:0009611	response to wounding	2.65e-15	1.03e-11	1.12e-13	9.89e-13	22	TGFB1,MYC,ERBB2,SPARC,IGF2,BRAF,CYR61,EGFR,TIMP1,TIMP3,SPP1,ESR1,CD44,AKT1,BCL2,TNF,MMP2,PTEN,MMP12,EZH2,SDC1,PTGS2
GO: Biological Process	GO:0051241	negative regulation of multicellular organismal process	6.14e-14	2.38e-10	2.15e-12	1.9e-11	22	TGFB1,MYC,CDKN1B,CDKN2A,MET,ERBB2,SPARC,TIMP1,SPP1,CD44,WT1,APC,BCL2,TNF,MMP2,CTNNB1,PTEN,MDM2,EZH2,TERT,PTGS2,CDK6
GO: Biological Process	GO:0033043	regulation of organelle organization	1.73e-13	6.72e-10	5.79e-12	5.12e-11	22	TGFB1,MYC,CDKN1B,CDKN2A,MET,PTTG1,IGF2,BRCA1,BRAF,ESR1,KIAA1324,APC,AKT1,BCL2,TNF,MSH2,FGFR2,CTNNB1,MMP9,TERT,SDC1,DNMT1
GO: Biological Process	GO:0006508	proteolysis	2.09e-10	8.1e-07	4.4e-09	3.89e-08	22	MYC,CDKN1B,CDKN2A,PTTG1,SERPINB5,CYR61,TIMP1,TIMP3,CD44,APC,AKT1,TNF,MMP1,MMP2,CTNNB1,MMP9,PTEN,MDM2,MMP12,MMP14,SKP2,CDH1
GO: Biological Process	GO:0002009	morphogenesis of an epithelium	3.39e-18	1.32e-14	2.74e-16	2.43e-15	21	TGFB1,MYC,KRAS,MET,SERPINB5,CYR61,EGFR,ESR1,ESR2,CD44,WT1,BCL2,TNF,FGFR2,MMP2,CTNNB1,RUNX3,MMP12,MMP14,CDH1,PGR
GO: Biological Process	GO:1903047	mitotic cell cycle process	1.67e-14	6.49e-11	6.37e-13	5.63e-12	21	TGFB1,CCNE1,CDKN1B,CDKN2A,MET,PTTG1,IGF2,EGFR,ESR1,APC,AKT1,BCL2,TNF,MSH2,FGFR2,PTEN,MDM2,EZH2,SKP2,TERT,CDK6
GO: Biological Process	GO:0009968	negative regulation of signal transduction	1.7e-12	6.62e-09	4.94e-11	4.37e-10	21	TGFB1,MYC,IGFBP3,BRCA1,EGFR,TIMP3,ESR1,ESR2,CD44,APC,AKT1,BCL2,TNF,CTNNB1,MMP9,PTEN,MDM2,EZH2,MMP14,TERT,CDH1
GO: Biological Process	GO:0051336	regulation of hydrolase activity	3.24e-11	1.26e-07	7.87e-10	6.96e-09	21	MYC,CDKN1B,CDKN2A,ERBB2,PTTG1,SERPINB5,CYR61,EGFR,TIMP1,TIMP3,ESR1,CD44,AKT1,TNF,MSH2,FGFR2,MMP9,MDM2,EZH2,MMP14,CDH1
GO: Biological Process	GO:0080134	regulation of response to stress	4.04e-10	1.57e-06	7.76e-09	6.86e-08	21	TGFB1,MYC,CDKN2A,KRAS,MET,IGF2,BRCA1,BRAF,EGFR,SPP1,ESR1,KIAA1324,CD44,AKT1,TNF,MMP2,PTEN,MDM2,TERT,PTGS2,CDK6
GO: Biological Process	GO:0010629	negative regulation of gene expression	7e-10	2.72e-06	1.25e-08	1.11e-07	21	TGFB1,MYC,CDKN1B,CDKN2A,MET,BRCA1,EGFR,ESR1,ESR2,WT1,AKT1,TNF,FGFR2,CTNNB1,RUNX3,MDM2,EZH2,TERT,CDH1,PGR,DNMT1
GO: Biological Process	GO:0006357	regulation of transcription by RNA polymerase II	1.34e-08	5.2e-05	1.75e-07	1.54e-06	21	TGFB1,MYC,CDKN2A,MET,IGF2,BRCA1,CYR61,EGFR,ESR1,ESR2,WT1,AKT1,TNF,FGFR2,CTNNB1,RUNX3,MDM2,EZH2,TERT,PGR,DNMT1
GO: Molecular Function	GO:0005102	receptor binding	3.59e-09	1.37e-06	2.84e-07	1.85e-06	20	TGFB1,CCNE1,ERBB2,IGF2,BRCA1,CYR61,EGFR,TIMP1,SPP1,GDF15,ESR1,ESR2,CD44,TNF,CTNNB1,PTEN,MDM2,MMP14,PGR,DNMT1
GO: Biological Process	GO:0050678	regulation of epithelial cell proliferation	2.57e-22	9.98e-19	4.99e-20	4.41e-19	20	TGFB1,MYC,CDKN1B,CDKN2A,ERBB2,SERPINB5,SPARC,EGFR,ESR1,ESR2,APC,AKT1,FGFR2,CTNNB1,RUNX3,PTEN,MMP12,CDH1,PGR,CDK6
GO: Biological Process	GO:0001503	ossification	2.23e-20	8.66e-17	3.09e-18	2.73e-17	20	TGFB1,SPARC,IGF2,IGFBP3,CYR61,EGFR,SPP1,ESR1,APC,AKT1,BCL2,TNF,FGFR2,MMP2,CTNNB1,MMP9,RUNX3,MMP14,PTGS2,CDK6
GO: Biological Process	GO:0045786	negative regulation of cell cycle	7.83e-19	3.04e-15	7.08e-17	6.26e-16	20	TGFB1,MYC,CDKN1B,CDKN2A,PTTG1,BRCA1,EGFR,RASSF1,ESR1,APC,BCL2,MSH2,FGFR2,CTNNB1,RUNX3,PTEN,MDM2,EZH2,PTGS2,CDK6
GO: Biological Process	GO:0007346	regulation of mitotic cell cycle	2.02e-18	7.84e-15	1.7e-16	1.51e-15	20	TGFB1,MYC,CDKN1B,CDKN2A,MET,PTTG1,IGF2,EGFR,ESR1,APC,AKT1,BCL2,TNF,MSH2,FGFR2,CTNNB1,PTEN,MDM2,EZH2,TERT
GO: Biological Process	GO:0043065	positive regulation of apoptotic process	2.32e-16	9.02e-13	1.33e-14	1.17e-13	20	TGFB1,MYC,CDKN1B,CDKN2A,IGFBP3,CYR61,TIMP3,ESR2,CD44,WT1,APC,AKT1,BCL2,TNF,MMP2,CTNNB1,MMP9,RUNX3,PTEN,PTGS2
GO: Biological Process	GO:0043068	positive regulation of programmed cell death	2.77e-16	1.08e-12	1.48e-14	1.31e-13	20	TGFB1,MYC,CDKN1B,CDKN2A,IGFBP3,CYR61,TIMP3,ESR2,CD44,WT1,APC,AKT1,BCL2,TNF,MMP2,CTNNB1,MMP9,RUNX3,PTEN,PTGS2
GO: Biological Process	GO:0010942	positive regulation of cell death	8.61e-16	3.35e-12	4.09e-14	3.61e-13	20	TGFB1,MYC,CDKN1B,CDKN2A,IGFBP3,CYR61,TIMP3,ESR2,CD44,WT1,APC,AKT1,BCL2,TNF,MMP2,CTNNB1,MMP9,RUNX3,PTEN,PTGS2
GO: Biological Process	GO:0051093	negative regulation of developmental process	1.52e-13	5.9e-10	5.17e-12	4.58e-11	20	TGFB1,MYC,CDKN1B,CDKN2A,KRAS,ERBB2,SPARC,TIMP1,SPP1,CD44,WT1,APC,BCL2,TNF,CTNNB1,PTEN,MDM2,EZH2,TERT,CDK6
GO: Biological Process	GO:0051130	positive regulation of cellular component organization	5.68e-11	2.21e-07	1.34e-09	1.18e-08	20	TGFB1,CDKN1B,MET,ERBB2,IGF2,IGFBP3,BRCA1,BRAF,GDF15,KIAA1324,APC,AKT1,BCL2,TNF,MMP1,CTNNB1,MMP9,EZH2,SDC1,DNMT1
GO: Biological Process	GO:0051049	regulation of transport	1.3e-07	0.000504	1.32e-06	1.17e-05	20	TGFB1,MYC,CDKN2A,MET,ERBB2,BRCA1,BRAF,EGFR,ESR1,AKT1,BCL2,TNF,CTNNB1,MMP9,PTEN,MDM2,TERT,CDH1,SDC1,PTGS2
GO: Molecular Function	GO:0098772	molecular function regulator	3.73e-09	1.42e-06	2.84e-07	1.85e-06	19	TGFB1,CCNE1,CDKN1B,CDKN2A,ERBB2,PTTG1,SERPINB5,IGF2,IGFBP3,EGFR,TIMP1,TIMP3,ESR1,ESR2,APC,AKT1,BCL2,FGFR2,MMP14
GO: Biological Process	GO:0042493	response to drug	1.65e-17	6.42e-14	1.19e-15	1.05e-14	19	TGFB1,MYC,CCNE1,CDKN1B,CDKN2A,IGF2,BRAF,ESR2,APC,BCL2,MMP2,CTNNB1,MMP9,PTEN,MDM2,MMP12,CDH1,PTGS2,DNMT1
GO: Biological Process	GO:0010035	response to inorganic substance	2.64e-16	1.03e-12	1.47e-14	1.3e-13	19	CDKN1B,CDKN2A,MET,SPARC,NDRG1,BRAF,EGFR,ESR2,BCL2,TNF,MMP2,CTNNB1,PTEN,MDM2,EZH2,CDH1,SDC1,PTGS2,DNMT1
GO: Biological Process	GO:0071407	cellular response to organic cyclic compound	2.82e-16	1.1e-12	1.48e-14	1.31e-13	19	TGFB1,CCNE1,CDKN1B,BRCA1,EGFR,ESR1,ESR2,WT1,AKT1,TNF,MMP2,CTNNB1,MDM2,EZH2,SKP2,TERT,CDH1,PTGS2,PGR
GO: Biological Process	GO:0040008	regulation of growth	2.63e-14	1.02e-10	9.81e-13	8.67e-12	19	TGFB1,CDKN1B,CDKN2A,ERBB2,PTTG1,IGF2,IGFBP3,CYR61,EGFR,SPP1,ESR2,CD44,WT1,AKT1,BCL2,TNF,FGFR2,PTEN,MMP14
GO: Biological Process	GO:0048609	multicellular organismal reproductive process	1.08e-12	4.19e-09	3.25e-11	2.87e-10	19	TGFB1,CCNE1,ERBB2,PTTG1,EGFR,SPP1,ESR1,ESR2,WT1,AKT1,BCL2,MSH2,MMP2,CTNNB1,PTEN,MMP14,CDH1,PTGS2,PGR
GO: Biological Process	GO:0032504	multicellular organism reproduction	1.4e-12	5.42e-09	4.11e-11	3.63e-10	19	TGFB1,CCNE1,ERBB2,PTTG1,EGFR,SPP1,ESR1,ESR2,WT1,AKT1,BCL2,MSH2,MMP2,CTNNB1,PTEN,MMP14,CDH1,PTGS2,PGR
GO: Biological Process	GO:1902533	positive regulation of intracellular signal transduction	4.17e-12	1.62e-08	1.12e-10	9.89e-10	19	TGFB1,CDKN2A,KRAS,MET,ERBB2,IGF2,IGFBP3,BRAF,EGFR,ESR1,ESR2,CD44,BCL2,TNF,FGFR2,CTNNB1,PTEN,EZH2,PTGS2
GO: Biological Process	GO:0030182	neuron differentiation	2.65e-09	1.03e-05	3.98e-08	3.52e-07	19	KRAS,MET,ERBB2,BRAF,EGFR,SPP1,CD44,APC,AKT1,BCL2,FGFR2,MMP2,CTNNB1,RUNX3,PTEN,MDM2,EZH2,CDH1,DNMT1
GO: Biological Process	GO:0007155	cell adhesion	1.17e-08	4.55e-05	1.55e-07	1.37e-06	19	TGFB1,CDKN2A,ERBB2,IGF2,BRAF,CYR61,EGFR,SPP1,CD44,APC,AKT1,BCL2,TNF,MMP2,CTNNB1,PTEN,MMP14,CDH1,CDK6
GO: Biological Process	GO:0022610	biological adhesion	1.33e-08	5.17e-05	1.74e-07	1.54e-06	19	TGFB1,CDKN2A,ERBB2,IGF2,BRAF,CYR61,EGFR,SPP1,CD44,APC,AKT1,BCL2,TNF,MMP2,CTNNB1,PTEN,MMP14,CDH1,CDK6
GO: Biological Process	GO:0051172	negative regulation of nitrogen compound metabolic process	3.62e-08	0.000141	4.27e-07	3.78e-06	19	TGFB1,MYC,CDKN1B,CDKN2A,MET,BRCA1,EGFR,ESR1,ESR2,WT1,TNF,MSH2,FGFR2,CTNNB1,RUNX3,MDM2,EZH2,TERT,DNMT1
GO: Biological Process	GO:0042592	homeostatic process	1.19e-07	0.000463	1.23e-06	1.08e-05	19	TGFB1,MYC,CDKN2A,KRAS,MET,EGFR,SPP1,ESR1,CD44,APC,AKT1,BCL2,TNF,CTNNB1,EZH2,TERT,CDH1,PTGS2,CDK6
GO: Molecular Function	GO:0032403	protein complex binding	2.63e-10	1e-07	3.34e-08	2.18e-07	18	MYC,CCNE1,CDKN1B,KRAS,MET,SPARC,IGF2,NDRG1,CYR61,EGFR,ESR1,CD44,APC,MSH2,CTNNB1,MMP9,PTEN,MMP14
GO: Biological Process	GO:0097305	response to alcohol	1.3e-17	5.04e-14	9.5e-16	8.4e-15	18	TGFB1,CCNE1,CDKN1B,SPARC,IGF2,BRCA1,EGFR,SPP1,ESR1,ESR2,APC,MMP2,CTNNB1,PTEN,EZH2,CDH1,PTGS2,DNMT1
GO: Biological Process	GO:0030335	positive regulation of cell migration	9.28e-17	3.6e-13	5.72e-15	5.06e-14	18	TGFB1,MYC,MET,SPARC,CYR61,EGFR,APC,AKT1,BCL2,TNF,MMP1,MMP2,MMP9,MDM2,MMP14,TERT,PTGS2,PGR
GO: Biological Process	GO:2000147	positive regulation of cell motility	1.54e-16	5.98e-13	9.34e-15	8.26e-14	18	TGFB1,MYC,MET,SPARC,CYR61,EGFR,APC,AKT1,BCL2,TNF,MMP1,MMP2,MMP9,MDM2,MMP14,TERT,PTGS2,PGR
GO: Biological Process	GO:0051272	positive regulation of cellular component movement	2.42e-16	9.4e-13	1.36e-14	1.2e-13	18	TGFB1,MYC,MET,SPARC,CYR61,EGFR,APC,AKT1,BCL2,TNF,MMP1,MMP2,MMP9,MDM2,MMP14,TERT,PTGS2,PGR
GO: Biological Process	GO:0040017	positive regulation of locomotion	3.13e-16	1.22e-12	1.6e-14	1.42e-13	18	TGFB1,MYC,MET,SPARC,CYR61,EGFR,APC,AKT1,BCL2,TNF,MMP1,MMP2,MMP9,MDM2,MMP14,TERT,PTGS2,PGR
GO: Biological Process	GO:0030155	regulation of cell adhesion	2.57e-13	9.97e-10	8.45e-12	7.47e-11	18	TGFB1,CDKN2A,ERBB2,IGF2,BRAF,CYR61,SPP1,CD44,APC,AKT1,BCL2,TNF,MMP2,CTNNB1,PTEN,MMP14,CDH1,CDK6
GO: Biological Process	GO:0045597	positive regulation of cell differentiation	5.06e-11	1.96e-07	1.2e-09	1.06e-08	18	TGFB1,MYC,CCNE1,CDKN2A,MET,IGFBP3,BRAF,CYR61,GDF15,APC,AKT1,BCL2,TNF,CTNNB1,EZH2,MMP14,TERT,PTGS2
GO: Biological Process	GO:1901701	cellular response to oxygen-containing compound	9.06e-11	3.52e-07	2.06e-09	1.82e-08	18	TGFB1,CDKN2A,MET,IGF2,BRCA1,EGFR,ESR1,ESR2,WT1,AKT1,TNF,MMP2,CTNNB1,MDM2,EZH2,CDH1,PTGS2,DNMT1
GO: Biological Process	GO:0045944	positive regulation of transcription by RNA polymerase II	3.84e-10	1.49e-06	7.49e-09	6.62e-08	18	TGFB1,MYC,CDKN2A,MET,IGF2,BRCA1,CYR61,EGFR,ESR1,ESR2,WT1,AKT1,TNF,FGFR2,CTNNB1,RUNX3,TERT,PGR
GO: Biological Process	GO:0048646	anatomical structure formation involved in morphogenesis	5.93e-09	2.3e-05	8.29e-08	7.33e-07	18	TGFB1,ERBB2,SPARC,BRCA1,CYR61,GDF15,CD44,WT1,TNF,FGFR2,MMP2,CTNNB1,MMP9,PTEN,MMP14,TERT,CDH1,PTGS2
GO: Biological Process	GO:0002682	regulation of immune system process	5.89e-08	0.000229	6.55e-07	5.79e-06	18	TGFB1,MYC,CDKN2A,KRAS,ERBB2,IGF2,ESR1,CD44,APC,AKT1,BCL2,TNF,MMP2,CTNNB1,MMP9,PTEN,MMP14,CDK6
GO: Biological Process	GO:0045934	negative regulation of nucleobase-containing compound metabolic process	6.01e-08	0.000233	6.66e-07	5.89e-06	18	TGFB1,MYC,CDKN1B,CDKN2A,MET,BRCA1,ESR1,ESR2,WT1,TNF,MSH2,FGFR2,CTNNB1,RUNX3,MDM2,EZH2,TERT,DNMT1
GO: Biological Process	GO:1901575	organic substance catabolic process	2.03e-06	0.0079	1.5e-05	0.000133	18	TGFB1,MYC,CDKN1B,CDKN2A,PTTG1,IGFBP3,EGFR,TIMP1,TIMP3,CD44,APC,AKT1,TNF,CTNNB1,PTEN,MDM2,SKP2,SDC1
GO: Molecular Function	GO:0042802	identical protein binding	7.82e-08	2.98e-05	3.31e-06	2.16e-05	17	TGFB1,ERBB2,BRAF,EGFR,RASSF1,ESR1,AKT1,BCL2,TNF,MSH2,FGFR2,MMP9,PTEN,MDM2,SKP2,TERT,PTGS2
GO: Biological Process	GO:0043627	response to estrogen	4.01e-20	1.56e-16	5.2e-18	4.59e-17	17	TGFB1,CCNE1,CDKN1B,IGF2,BRCA1,EGFR,TIMP3,ESR1,ESR2,MMP2,CTNNB1,PTEN,MDM2,EZH2,MMP14,PTGS2,DNMT1
GO: Biological Process	GO:0009991	response to extracellular stimulus	4.77e-13	1.85e-09	1.51e-11	1.33e-10	17	TGFB1,CCNE1,SPARC,IGF2,BRCA1,TIMP3,SPP1,ESR2,KIAA1324,AKT1,BCL2,MMP9,PTEN,MDM2,SKP2,PTGS2,DNMT1
GO: Biological Process	GO:0061061	muscle structure development	1.15e-12	4.46e-09	3.43e-11	3.04e-10	17	TGFB1,MYC,KRAS,MET,IGF2,IGFBP3,GDF15,WT1,AKT1,BCL2,TNF,FGFR2,CTNNB1,PTEN,EZH2,MMP14,SDC1
GO: Biological Process	GO:0030855	epithelial cell differentiation	1.3e-12	5.04e-09	3.85e-11	3.4e-10	17	TGFB1,MET,ESR1,ESR2,WT1,APC,AKT1,BCL2,TNF,FGFR2,CTNNB1,EZH2,CDH1,SDC1,PTGS2,PGR,CDK6
GO: Biological Process	GO:0035295	tube development	2.29e-12	8.9e-09	6.54e-11	5.78e-10	17	TGFB1,MYC,KRAS,MET,SPARC,EGFR,ESR1,CD44,WT1,BCL2,TNF,FGFR2,CTNNB1,MMP14,CDH1,SDC1,PGR
GO: Biological Process	GO:0030162	regulation of proteolysis	1.16e-11	4.52e-08	2.9e-10	2.56e-09	17	MYC,CDKN1B,CDKN2A,PTTG1,SERPINB5,CYR61,TIMP1,TIMP3,CD44,APC,AKT1,TNF,MMP9,PTEN,MDM2,MMP14,CDH1
GO: Biological Process	GO:0031175	neuron projection development	3.96e-10	1.54e-06	7.68e-09	6.79e-08	17	KRAS,MET,ERBB2,BRAF,EGFR,SPP1,CD44,APC,AKT1,BCL2,FGFR2,MMP2,RUNX3,PTEN,MDM2,EZH2,CDH1
GO: Biological Process	GO:0001775	cell activation	8.41e-10	3.27e-06	1.47e-08	1.3e-07	17	TGFB1,CDKN2A,ERBB2,IGF2,NDRG1,BRAF,EGFR,TIMP1,CD44,APC,AKT1,BCL2,TNF,MSH2,CTNNB1,MMP14,CDK6
GO: Biological Process	GO:0007417	central nervous system development	8.53e-10	3.32e-06	1.49e-08	1.32e-07	17	TGFB1,KRAS,MET,ERBB2,BRCA1,EGFR,TIMP3,ESR2,AKT1,BCL2,FGFR2,CTNNB1,PTEN,EZH2,CDH1,DNMT1,CDK6
GO: Biological Process	GO:0051338	regulation of transferase activity	9.07e-10	3.52e-06	1.57e-08	1.39e-07	17	TGFB1,CCNE1,CDKN1B,CDKN2A,KRAS,MET,ERBB2,IGF2,BRAF,CYR61,EGFR,APC,AKT1,TNF,CTNNB1,PTEN,EZH2
GO: Biological Process	GO:0007167	enzyme linked receptor protein signaling pathway	1.06e-09	4.1e-06	1.78e-08	1.58e-07	17	TGFB1,KRAS,MET,ERBB2,IGF2,IGFBP3,CYR61,EGFR,GDF15,ESR1,ESR2,AKT1,FGFR2,MMP2,CTNNB1,MMP9,PTEN
GO: Biological Process	GO:0044703	multi-organism reproductive process	1.51e-09	5.85e-06	2.45e-08	2.16e-07	17	TGFB1,PTTG1,IGF2,TIMP1,SPP1,ESR1,WT1,AKT1,BCL2,MSH2,MMP2,CTNNB1,MMP9,PTEN,CDH1,PTGS2,PGR
GO: Biological Process	GO:0072359	circulatory system development	1.95e-09	7.58e-06	3.05e-08	2.69e-07	17	TGFB1,MET,ERBB2,SPARC,BRCA1,CYR61,WT1,AKT1,FGFR2,MMP2,CTNNB1,MMP9,PTEN,MDM2,MMP14,TERT,PTGS2
GO: Biological Process	GO:0072358	cardiovascular system development	1.95e-09	7.58e-06	3.05e-08	2.69e-07	17	TGFB1,MET,ERBB2,SPARC,BRCA1,CYR61,WT1,AKT1,FGFR2,MMP2,CTNNB1,MMP9,PTEN,MDM2,MMP14,TERT,PTGS2
GO: Biological Process	GO:0048666	neuron development	4.25e-09	1.65e-05	6.13e-08	5.42e-07	17	KRAS,MET,ERBB2,BRAF,EGFR,SPP1,CD44,APC,AKT1,BCL2,FGFR2,MMP2,RUNX3,PTEN,MDM2,EZH2,CDH1
GO: Biological Process	GO:0009057	macromolecule catabolic process	1.71e-08	6.66e-05	2.18e-07	1.92e-06	17	TGFB1,CDKN1B,CDKN2A,PTTG1,IGFBP3,EGFR,TIMP1,TIMP3,CD44,APC,AKT1,TNF,CTNNB1,PTEN,MDM2,SKP2,SDC1
GO: Biological Process	GO:0018193	peptidyl-amino acid modification	2.13e-08	8.27e-05	2.63e-07	2.33e-06	17	TGFB1,CDKN2A,MET,ERBB2,IGF2,BRCA1,BRAF,EGFR,CD44,AKT1,BCL2,TNF,FGFR2,CTNNB1,MDM2,EZH2,DNMT1
GO: Biological Process	GO:0000902	cell morphogenesis	6.35e-08	0.000247	6.92e-07	6.12e-06	17	TGFB1,KRAS,MET,ERBB2,SPARC,BRAF,EGFR,SPP1,WT1,APC,BCL2,FGFR2,CTNNB1,RUNX3,PTEN,EZH2,CDH1
GO: Biological Process	GO:0051253	negative regulation of RNA metabolic process	8.68e-08	0.000337	9.21e-07	8.15e-06	17	TGFB1,MYC,CDKN1B,CDKN2A,MET,BRCA1,ESR1,ESR2,WT1,TNF,FGFR2,CTNNB1,RUNX3,MDM2,EZH2,TERT,DNMT1
GO: Biological Process	GO:0060341	regulation of cellular localization	1.46e-07	0.000567	1.47e-06	1.3e-05	17	TGFB1,CDKN2A,ERBB2,BRCA1,BRAF,EGFR,APC,AKT1,BCL2,TNF,CTNNB1,PTEN,MDM2,TERT,CDH1,SDC1,PTGS2
GO: Biological Process	GO:0030030	cell projection organization	1.57e-07	0.000609	1.56e-06	1.38e-05	17	KRAS,MET,ERBB2,BRAF,EGFR,SPP1,CD44,APC,AKT1,BCL2,FGFR2,MMP2,RUNX3,PTEN,MDM2,EZH2,CDH1
GO: Biological Process	GO:0032989	cellular component morphogenesis	1.68e-07	0.000653	1.66e-06	1.47e-05	17	TGFB1,KRAS,MET,ERBB2,SPARC,BRAF,EGFR,SPP1,WT1,APC,BCL2,FGFR2,CTNNB1,RUNX3,PTEN,EZH2,CDH1
GO: Biological Process	GO:2000113	negative regulation of cellular macromolecule biosynthetic process	2.09e-07	0.000814	2.02e-06	1.79e-05	17	TGFB1,MYC,CDKN1B,CDKN2A,MET,BRCA1,EGFR,ESR1,ESR2,WT1,TNF,FGFR2,CTNNB1,RUNX3,MDM2,EZH2,DNMT1
GO: Biological Process	GO:0010558	negative regulation of macromolecule biosynthetic process	4.84e-07	0.00188	4.27e-06	3.77e-05	17	TGFB1,MYC,CDKN1B,CDKN2A,MET,BRCA1,EGFR,ESR1,ESR2,WT1,TNF,FGFR2,CTNNB1,RUNX3,MDM2,EZH2,DNMT1
GO: Biological Process	GO:0031327	negative regulation of cellular biosynthetic process	8.67e-07	0.00337	7.09e-06	6.27e-05	17	TGFB1,MYC,CDKN1B,CDKN2A,MET,BRCA1,EGFR,ESR1,ESR2,WT1,TNF,FGFR2,CTNNB1,RUNX3,MDM2,EZH2,DNMT1
GO: Biological Process	GO:0009890	negative regulation of biosynthetic process	1.12e-06	0.00436	8.89e-06	7.86e-05	17	TGFB1,MYC,CDKN1B,CDKN2A,MET,BRCA1,EGFR,ESR1,ESR2,WT1,TNF,FGFR2,CTNNB1,RUNX3,MDM2,EZH2,DNMT1
GO: Biological Process	GO:0034613	cellular protein localization	1.46e-06	0.00567	1.13e-05	9.94e-05	17	TGFB1,CDKN2A,ERBB2,BRCA1,BRAF,EGFR,ESR1,APC,AKT1,BCL2,TNF,CTNNB1,MDM2,EZH2,TERT,CDH1,PTGS2
GO: Biological Process	GO:0070727	cellular macromolecule localization	1.59e-06	0.00616	1.22e-05	0.000107	17	TGFB1,CDKN2A,ERBB2,BRCA1,BRAF,EGFR,ESR1,APC,AKT1,BCL2,TNF,CTNNB1,MDM2,EZH2,TERT,CDH1,PTGS2
GO: Biological Process	GO:0044248	cellular catabolic process	5.21e-06	0.0203	3.36e-05	0.000297	17	TGFB1,MYC,CDKN2A,MET,PTTG1,IGFBP3,TIMP1,TIMP3,KIAA1324,APC,AKT1,BCL2,TNF,CTNNB1,PTEN,MDM2,SKP2
GO: Biological Process	GO:0043410	positive regulation of MAPK cascade	4.72e-13	1.84e-09	1.5e-11	1.33e-10	16	TGFB1,KRAS,MET,ERBB2,IGF2,IGFBP3,BRAF,EGFR,ESR1,ESR2,CD44,TNF,FGFR2,CTNNB1,PTEN,EZH2
GO: Biological Process	GO:0016049	cell growth	1.45e-12	5.64e-09	4.24e-11	3.75e-10	16	TGFB1,CDKN1B,CDKN2A,ERBB2,PTTG1,IGFBP3,CYR61,EGFR,SPP1,ESR1,ESR2,CD44,WT1,AKT1,BCL2,MMP14
GO: Biological Process	GO:1901699	cellular response to nitrogen compound	3.62e-12	1.41e-08	9.91e-11	8.77e-10	16	TGFB1,IGF2,BRCA1,EGFR,ESR1,WT1,AKT1,TNF,MMP2,CTNNB1,MDM2,EZH2,TERT,CDH1,PTGS2,DNMT1
GO: Biological Process	GO:0080135	regulation of cellular response to stress	1.14e-10	4.41e-07	2.55e-09	2.25e-08	16	MYC,CDKN2A,KRAS,MET,BRCA1,BRAF,EGFR,SPP1,KIAA1324,CD44,AKT1,TNF,PTEN,MDM2,TERT,CDK6
GO: Biological Process	GO:0045859	regulation of protein kinase activity	1.77e-10	6.87e-07	3.75e-09	3.32e-08	16	TGFB1,CCNE1,CDKN1B,CDKN2A,KRAS,MET,ERBB2,IGF2,BRAF,CYR61,EGFR,APC,AKT1,TNF,PTEN,EZH2
GO: Biological Process	GO:0060322	head development	2.92e-10	1.14e-06	5.94e-09	5.26e-08	16	TGFB1,KRAS,MET,BRCA1,BRAF,EGFR,ESR2,BCL2,FGFR2,MMP2,CTNNB1,PTEN,EZH2,CDH1,DNMT1,CDK6
GO: Biological Process	GO:0043549	regulation of kinase activity	5.95e-10	2.31e-06	1.09e-08	9.64e-08	16	TGFB1,CCNE1,CDKN1B,CDKN2A,KRAS,MET,ERBB2,IGF2,BRAF,CYR61,EGFR,APC,AKT1,TNF,PTEN,EZH2
GO: Biological Process	GO:0030097	hemopoiesis	6.94e-10	2.7e-06	1.25e-08	1.1e-07	16	TGFB1,MYC,CDKN2A,ERBB2,BRAF,CD44,APC,BCL2,TNF,MSH2,FGFR2,CTNNB1,MMP9,RUNX3,MMP14,CDK6
GO: Biological Process	GO:0048534	hematopoietic or lymphoid organ development	1.51e-09	5.87e-06	2.45e-08	2.16e-07	16	TGFB1,MYC,CDKN2A,ERBB2,BRAF,CD44,APC,BCL2,TNF,MSH2,FGFR2,CTNNB1,MMP9,RUNX3,MMP14,CDK6
GO: Biological Process	GO:0002520	immune system development	3.35e-09	1.3e-05	4.91e-08	4.34e-07	16	TGFB1,MYC,CDKN2A,ERBB2,BRAF,CD44,APC,BCL2,TNF,MSH2,FGFR2,CTNNB1,MMP9,RUNX3,MMP14,CDK6
GO: Biological Process	GO:0044092	negative regulation of molecular function	5.49e-08	0.000213	6.14e-07	5.43e-06	16	MYC,CDKN1B,CDKN2A,PTTG1,SERPINB5,TIMP1,TIMP3,ESR1,CD44,APC,AKT1,TNF,MMP9,PTEN,MDM2,EZH2
GO: Biological Process	GO:0045892	negative regulation of transcription, DNA-templated	1.8e-07	0.000698	1.76e-06	1.56e-05	16	TGFB1,MYC,CDKN1B,CDKN2A,MET,BRCA1,ESR1,ESR2,WT1,TNF,FGFR2,CTNNB1,RUNX3,MDM2,EZH2,DNMT1
GO: Biological Process	GO:1903507	negative regulation of nucleic acid-templated transcription	2.81e-07	0.00109	2.58e-06	2.28e-05	16	TGFB1,MYC,CDKN1B,CDKN2A,MET,BRCA1,ESR1,ESR2,WT1,TNF,FGFR2,CTNNB1,RUNX3,MDM2,EZH2,DNMT1
GO: Biological Process	GO:1902679	negative regulation of RNA biosynthetic process	3.28e-07	0.00127	2.98e-06	2.64e-05	16	TGFB1,MYC,CDKN1B,CDKN2A,MET,BRCA1,ESR1,ESR2,WT1,TNF,FGFR2,CTNNB1,RUNX3,MDM2,EZH2,DNMT1
GO: Molecular Function	GO:0030234	enzyme regulator activity	7.25e-08	2.76e-05	3.31e-06	2.16e-05	15	TGFB1,CCNE1,CDKN1B,CDKN2A,PTTG1,SERPINB5,IGF2,IGFBP3,EGFR,TIMP1,TIMP3,ESR1,APC,AKT1,MMP14
GO: Biological Process	GO:0045787	positive regulation of cell cycle	2.48e-14	9.64e-11	9.36e-13	8.28e-12	15	TGFB1,MYC,CDKN1B,CDKN2A,MET,IGF2,NDRG1,BRCA1,EGFR,RASSF1,AKT1,TNF,FGFR2,MDM2,TERT
GO: Biological Process	GO:0030198	extracellular matrix organization	2.7e-14	1.05e-10	9.98e-13	8.82e-12	15	TGFB1,SERPINB5,SPARC,CYR61,TIMP1,SPP1,CD44,WT1,TNF,MMP1,MMP2,MMP9,MMP12,MMP14,CDH1
GO: Biological Process	GO:0043062	extracellular structure organization	2.81e-14	1.09e-10	1.01e-12	8.94e-12	15	TGFB1,SERPINB5,SPARC,CYR61,TIMP1,SPP1,CD44,WT1,TNF,MMP1,MMP2,MMP9,MMP12,MMP14,CDH1
GO: Biological Process	GO:0001655	urogenital system development	2.81e-14	1.09e-10	1.01e-12	8.94e-12	15	TGFB1,MYC,CDKN1B,SERPINB5,ESR1,ESR2,CD44,WT1,APC,BCL2,FGFR2,MMP2,CTNNB1,PTEN,SDC1
GO: Biological Process	GO:0042692	muscle cell differentiation	2.46e-13	9.54e-10	8.15e-12	7.21e-11	15	TGFB1,KRAS,MET,IGF2,IGFBP3,GDF15,WT1,AKT1,BCL2,TNF,FGFR2,CTNNB1,EZH2,MMP14,SDC1
GO: Biological Process	GO:0035239	tube morphogenesis	2.73e-13	1.06e-09	8.9e-12	7.87e-11	15	TGFB1,MYC,KRAS,MET,EGFR,ESR1,CD44,WT1,BCL2,TNF,FGFR2,CTNNB1,MMP14,CDH1,PGR
GO: Biological Process	GO:0052547	regulation of peptidase activity	2.82e-13	1.1e-09	9.14e-12	8.08e-11	15	MYC,CDKN1B,CDKN2A,PTTG1,SERPINB5,CYR61,TIMP1,TIMP3,CD44,AKT1,TNF,MMP9,MDM2,MMP14,CDH1
GO: Biological Process	GO:0001558	regulation of cell growth	7.47e-13	2.9e-09	2.3e-11	2.04e-10	15	TGFB1,CDKN1B,CDKN2A,ERBB2,PTTG1,IGFBP3,CYR61,EGFR,SPP1,ESR2,CD44,WT1,AKT1,BCL2,MMP14
GO: Biological Process	GO:0031667	response to nutrient levels	4.33e-11	1.68e-07	1.04e-09	9.19e-09	15	TGFB1,CCNE1,SPARC,IGF2,BRCA1,TIMP3,SPP1,ESR2,KIAA1324,AKT1,BCL2,PTEN,MDM2,PTGS2,DNMT1
GO: Biological Process	GO:0097190	apoptotic signaling pathway	9.48e-11	3.68e-07	2.14e-09	1.89e-08	15	TGFB1,MYC,BRCA1,TIMP3,ESR2,CD44,AKT1,BCL2,TNF,MSH2,CTNNB1,MMP9,RUNX3,PTEN,TERT
GO: Biological Process	GO:0001568	blood vessel development	1.64e-10	6.36e-07	3.51e-09	3.11e-08	15	ERBB2,SPARC,BRCA1,CYR61,WT1,AKT1,FGFR2,MMP2,CTNNB1,MMP9,PTEN,MDM2,MMP14,TERT,PTGS2
GO: Biological Process	GO:0022411	cellular component disassembly	2.11e-10	8.19e-07	4.43e-09	3.92e-08	15	TGFB1,CDKN2A,IGFBP3,TIMP1,SPP1,CD44,APC,TNF,MMP1,MMP2,CTNNB1,MMP9,MMP12,MMP14,CDH1
GO: Biological Process	GO:0070848	response to growth factor	2.49e-10	9.68e-07	5.18e-09	4.58e-08	15	TGFB1,MYC,ERBB2,SPARC,CYR61,EGFR,GDF15,CD44,APC,AKT1,FGFR2,CTNNB1,RUNX3,MDM2,DNMT1
GO: Biological Process	GO:0001944	vasculature development	2.82e-10	1.1e-06	5.76e-09	5.1e-08	15	ERBB2,SPARC,BRCA1,CYR61,WT1,AKT1,FGFR2,MMP2,CTNNB1,MMP9,PTEN,MDM2,MMP14,TERT,PTGS2
GO: Biological Process	GO:0051129	negative regulation of cellular component organization	3e-10	1.16e-06	6.01e-09	5.31e-08	15	TGFB1,PTTG1,BRCA1,SPP1,ESR1,APC,AKT1,TNF,MSH2,FGFR2,CTNNB1,PTEN,MDM2,MMP14,DNMT1
GO: Biological Process	GO:0045596	negative regulation of cell differentiation	3.97e-10	1.54e-06	7.68e-09	6.79e-08	15	TGFB1,MYC,CDKN2A,KRAS,ERBB2,SPP1,CD44,BCL2,TNF,CTNNB1,PTEN,MDM2,EZH2,TERT,CDK6
GO: Biological Process	GO:0007169	transmembrane receptor protein tyrosine kinase signaling pathway	4.47e-10	1.74e-06	8.56e-09	7.57e-08	15	TGFB1,KRAS,MET,ERBB2,IGF2,IGFBP3,EGFR,ESR1,ESR2,AKT1,FGFR2,MMP2,CTNNB1,MMP9,PTEN
GO: Biological Process	GO:0009894	regulation of catabolic process	1.87e-09	7.28e-06	2.96e-08	2.62e-07	15	MYC,CDKN1B,CDKN2A,MET,IGFBP3,EGFR,TIMP1,TIMP3,KIAA1324,APC,AKT1,BCL2,TNF,PTEN,MDM2
GO: Biological Process	GO:0006974	cellular response to DNA damage stimulus	2.79e-09	1.08e-05	4.16e-08	3.68e-07	15	MYC,CDKN1B,CDKN2A,PTTG1,NDRG1,BRCA1,EGFR,RASSF1,CD44,APC,AKT1,BCL2,TNF,MSH2,MDM2
GO: Biological Process	GO:0000904	cell morphogenesis involved in differentiation	5.4e-09	2.1e-05	7.57e-08	6.69e-07	15	TGFB1,KRAS,MET,ERBB2,BRAF,SPP1,WT1,APC,BCL2,FGFR2,CTNNB1,RUNX3,PTEN,EZH2,CDH1
GO: Biological Process	GO:0098609	cell-cell adhesion	4.23e-08	0.000164	4.92e-07	4.35e-06	15	TGFB1,CDKN2A,ERBB2,IGF2,BRAF,CYR61,EGFR,CD44,APC,AKT1,BCL2,TNF,CTNNB1,CDH1,CDK6
GO: Biological Process	GO:0060284	regulation of cell development	4.52e-08	0.000176	5.18e-07	4.58e-06	15	TGFB1,MYC,CDKN2A,MET,BRAF,SPP1,AKT1,BCL2,TNF,CTNNB1,PTEN,MDM2,EZH2,TERT,CDH1
GO: Biological Process	GO:0006259	DNA metabolic process	4.97e-08	0.000193	5.63e-07	4.97e-06	15	TGFB1,MYC,CCNE1,CDKN2A,MET,PTTG1,IGFBP3,BRCA1,EGFR,AKT1,MSH2,CTNNB1,EZH2,TERT,DNMT1
GO: Biological Process	GO:0009790	embryo development	2.87e-07	0.00112	2.64e-06	2.33e-05	15	MYC,BRCA1,CYR61,EGFR,WT1,AKT1,TNF,MSH2,FGFR2,MMP2,CTNNB1,MMP9,MMP14,CDH1,DNMT1
GO: Biological Process	GO:0007267	cell-cell signaling	8.26e-07	0.00321	6.82e-06	6.03e-05	15	KRAS,MET,BRAF,CYR61,EGFR,GDF15,ESR2,AKT1,TNF,FGFR2,CTNNB1,MMP9,PTEN,PTGS2,PGR
GO: Cellular Component	GO:0005615	extracellular space	4.63e-06	0.00138	0.00023	0.00144	15	TGFB1,MET,SERPINB5,SPARC,IGF2,IGFBP3,EGFR,TIMP1,TIMP3,SPP1,GDF15,TNF,MMP1,MMP2,MMP9
GO: Biological Process	GO:0032355	response to estradiol	4.29e-18	1.67e-14	3.4e-16	3.01e-15	14	TGFB1,CCNE1,CDKN1B,IGF2,BRCA1,EGFR,ESR1,ESR2,MMP2,CTNNB1,PTEN,EZH2,PTGS2,DNMT1
GO: Biological Process	GO:0022612	gland morphogenesis	4.71e-18	1.83e-14	3.66e-16	3.24e-15	14	TGFB1,CDKN2A,MET,SERPINB5,EGFR,ESR1,ESR2,CD44,BCL2,TNF,FGFR2,MMP2,CDH1,PGR
GO: Biological Process	GO:0033002	muscle cell proliferation	8.21e-17	3.19e-13	5.15e-15	4.55e-14	14	MYC,CDKN1B,IGFBP3,EGFR,ESR1,ESR2,TNF,FGFR2,CTNNB1,PTEN,MDM2,SKP2,TERT,PTGS2
GO: Biological Process	GO:0061138	morphogenesis of a branching epithelium	8.63e-16	3.35e-12	4.09e-14	3.61e-13	14	TGFB1,MYC,KRAS,MET,ESR1,CD44,WT1,BCL2,TNF,FGFR2,CTNNB1,MMP14,CDH1,PGR
GO: Biological Process	GO:0001763	morphogenesis of a branching structure	2.29e-15	8.9e-12	1e-13	8.84e-13	14	TGFB1,MYC,KRAS,MET,ESR1,CD44,WT1,BCL2,TNF,FGFR2,CTNNB1,MMP14,CDH1,PGR
GO: Biological Process	GO:0052548	regulation of endopeptidase activity	2.36e-12	9.16e-09	6.69e-11	5.91e-10	14	MYC,CDKN1B,CDKN2A,PTTG1,SERPINB5,CYR61,TIMP1,TIMP3,CD44,AKT1,TNF,MMP9,MDM2,CDH1
GO: Biological Process	GO:0071900	regulation of protein serine/threonine kinase activity	8.23e-11	3.2e-07	1.88e-09	1.66e-08	14	TGFB1,CDKN1B,CDKN2A,KRAS,MET,ERBB2,IGF2,BRAF,EGFR,APC,AKT1,TNF,PTEN,EZH2
GO: Biological Process	GO:0044772	mitotic cell cycle phase transition	1.23e-10	4.79e-07	2.75e-09	2.43e-08	14	TGFB1,CCNE1,CDKN1B,CDKN2A,EGFR,APC,AKT1,BCL2,PTEN,MDM2,EZH2,SKP2,TERT,CDK6
GO: Biological Process	GO:0001501	skeletal system development	1.26e-10	4.91e-07	2.77e-09	2.45e-08	14	TGFB1,MYC,SPARC,IGF2,CYR61,TIMP1,ESR1,CD44,FGFR2,MMP2,CTNNB1,MMP9,RUNX3,MMP14
GO: Biological Process	GO:0002521	leukocyte differentiation	1.33e-10	5.16e-07	2.9e-09	2.56e-08	14	TGFB1,MYC,CDKN2A,ERBB2,BRAF,CD44,APC,BCL2,TNF,MSH2,CTNNB1,MMP9,MMP14,CDK6
GO: Biological Process	GO:0044770	cell cycle phase transition	2.31e-10	8.99e-07	4.83e-09	4.27e-08	14	TGFB1,CCNE1,CDKN1B,CDKN2A,EGFR,APC,AKT1,BCL2,PTEN,MDM2,EZH2,SKP2,TERT,CDK6
GO: Biological Process	GO:0042060	wound healing	3.28e-10	1.27e-06	6.53e-09	5.77e-08	14	TGFB1,MYC,ERBB2,SPARC,IGF2,CYR61,EGFR,TIMP1,TIMP3,CD44,AKT1,MMP12,EZH2,SDC1
GO: Biological Process	GO:1903827	regulation of cellular protein localization	6.12e-10	2.38e-06	1.12e-08	9.87e-08	14	TGFB1,CDKN2A,ERBB2,BRCA1,EGFR,APC,AKT1,BCL2,TNF,CTNNB1,MDM2,TERT,CDH1,PTGS2
GO: Biological Process	GO:0010638	positive regulation of organelle organization	8.99e-10	3.49e-06	1.56e-08	1.38e-07	14	TGFB1,CDKN1B,MET,IGF2,BRCA1,BRAF,KIAA1324,APC,BCL2,TNF,CTNNB1,MMP9,SDC1,DNMT1
GO: Biological Process	GO:0051347	positive regulation of transferase activity	2.41e-09	9.36e-06	3.67e-08	3.25e-07	14	TGFB1,CDKN1B,KRAS,MET,ERBB2,IGF2,BRAF,CYR61,EGFR,AKT1,TNF,CTNNB1,PTEN,EZH2
GO: Biological Process	GO:0031400	negative regulation of protein modification process	2.46e-09	9.55e-06	3.73e-08	3.3e-07	14	TGFB1,MYC,CDKN1B,CDKN2A,MET,IGFBP3,BRCA1,TIMP3,APC,AKT1,TNF,CTNNB1,PTEN,DNMT1
GO: Biological Process	GO:0032870	cellular response to hormone stimulus	3.03e-09	1.18e-05	4.5e-08	3.98e-07	14	TGFB1,CCNE1,IGF2,BRCA1,EGFR,ESR1,ESR2,WT1,AKT1,MMP2,CTNNB1,MDM2,SKP2,PGR
GO: Biological Process	GO:0045321	leukocyte activation	3.87e-08	0.00015	4.56e-07	4.03e-06	14	TGFB1,CDKN2A,ERBB2,IGF2,NDRG1,BRAF,CD44,APC,AKT1,BCL2,MSH2,CTNNB1,MMP14,CDK6
GO: Biological Process	GO:0051960	regulation of nervous system development	8.36e-08	0.000325	8.94e-07	7.9e-06	14	TGFB1,MYC,MET,BRAF,SPP1,AKT1,BCL2,TNF,CTNNB1,PTEN,MDM2,EZH2,TERT,CDH1
GO: Biological Process	GO:0033365	protein localization to organelle	1.41e-07	0.000547	1.42e-06	1.25e-05	14	TGFB1,CDKN2A,BRCA1,EGFR,ESR1,AKT1,BCL2,TNF,CTNNB1,MDM2,EZH2,TERT,CDH1,PTGS2
GO: Biological Process	GO:0032880	regulation of protein localization	7.68e-07	0.00299	6.38e-06	5.64e-05	14	TGFB1,CDKN2A,ERBB2,BRCA1,EGFR,APC,AKT1,BCL2,TNF,CTNNB1,MDM2,TERT,CDH1,PTGS2
GO: Biological Process	GO:0006952	defense response	0.000123	0.479	0.000555	0.00491	14	TGFB1,KRAS,IGF2,EGFR,SPP1,ESR1,ESR2,CD44,AKT1,BCL2,TNF,MMP2,SDC1,PTGS2
GO: Cellular Component	GO:0005739	mitochondrion	0.0002	0.0597	0.00193	0.0121	14	MYC,CDKN2A,KRAS,SPARC,BRCA1,BRAF,ESR1,ESR2,AKT1,BCL2,MMP2,PTEN,TERT,PGR
GO: Molecular Function	GO:0008270	zinc ion binding	1.81e-05	0.0069	0.000363	0.00237	13	BRCA1,RASSF1,ESR1,ESR2,WT1,MMP1,MMP2,MMP9,MDM2,MMP12,MMP14,PGR,DNMT1
GO: Molecular Function	GO:0046914	transition metal ion binding	0.000127	0.0483	0.00134	0.00875	13	BRCA1,RASSF1,ESR1,ESR2,WT1,MMP1,MMP2,MMP9,MDM2,MMP12,MMP14,PGR,DNMT1
GO: Biological Process	GO:0048660	regulation of smooth muscle cell proliferation	2.3e-17	8.94e-14	1.57e-15	1.39e-14	13	MYC,CDKN1B,IGFBP3,EGFR,ESR1,ESR2,TNF,FGFR2,CTNNB1,MDM2,SKP2,TERT,PTGS2
GO: Biological Process	GO:0048659	smooth muscle cell proliferation	3.46e-17	1.35e-13	2.28e-15	2.02e-14	13	MYC,CDKN1B,IGFBP3,EGFR,ESR1,ESR2,TNF,FGFR2,CTNNB1,MDM2,SKP2,TERT,PTGS2
GO: Biological Process	GO:0048754	branching morphogenesis of an epithelial tube	2.53e-15	9.83e-12	1.08e-13	9.55e-13	13	TGFB1,MYC,KRAS,MET,ESR1,CD44,WT1,BCL2,TNF,FGFR2,CTNNB1,MMP14,PGR
GO: Biological Process	GO:0045930	negative regulation of mitotic cell cycle	3.46e-14	1.34e-10	1.23e-12	1.09e-11	13	TGFB1,CDKN1B,PTTG1,EGFR,ESR1,APC,BCL2,MSH2,FGFR2,CTNNB1,PTEN,MDM2,EZH2
GO: Biological Process	GO:0042063	gliogenesis	5.46e-13	2.12e-09	1.71e-11	1.51e-10	13	TGFB1,MYC,KRAS,ERBB2,NDRG1,EGFR,AKT1,CTNNB1,PTEN,EZH2,MMP14,TERT,CDK6
GO: Biological Process	GO:0010038	response to metal ion	1.57e-11	6.09e-08	3.88e-10	3.43e-09	13	CDKN1B,SPARC,NDRG1,BRAF,EGFR,BCL2,CTNNB1,PTEN,MDM2,CDH1,SDC1,PTGS2,DNMT1
GO: Biological Process	GO:0060562	epithelial tube morphogenesis	2.13e-11	8.26e-08	5.2e-10	4.59e-09	13	TGFB1,MYC,KRAS,MET,ESR1,CD44,WT1,BCL2,TNF,FGFR2,CTNNB1,MMP14,PGR
GO: Biological Process	GO:0009314	response to radiation	4.79e-10	1.86e-06	8.99e-09	7.95e-08	13	TGFB1,MYC,KRAS,IGF2,BRCA1,BRAF,EGFR,AKT1,BCL2,MSH2,MDM2,PTGS2,DNMT1
GO: Biological Process	GO:0071417	cellular response to organonitrogen compound	1.18e-09	4.59e-06	1.98e-08	1.75e-07	13	IGF2,BRCA1,EGFR,WT1,AKT1,TNF,MMP2,CTNNB1,MDM2,EZH2,CDH1,PTGS2,DNMT1
GO: Biological Process	GO:0048514	blood vessel morphogenesis	2.55e-09	9.92e-06	3.84e-08	3.4e-07	13	ERBB2,SPARC,BRCA1,CYR61,WT1,FGFR2,MMP2,CTNNB1,MMP9,PTEN,MMP14,TERT,PTGS2
GO: Biological Process	GO:0071396	cellular response to lipid	4e-09	1.56e-05	5.85e-08	5.17e-07	13	TGFB1,CCNE1,BRCA1,EGFR,ESR1,ESR2,AKT1,TNF,MMP2,CTNNB1,MDM2,SKP2,PGR
GO: Biological Process	GO:0071363	cellular response to growth factor stimulus	1.61e-08	6.27e-05	2.08e-07	1.84e-06	13	TGFB1,ERBB2,SPARC,CYR61,EGFR,GDF15,CD44,APC,AKT1,FGFR2,CTNNB1,MDM2,DNMT1
GO: Biological Process	GO:0031329	regulation of cellular catabolic process	2.32e-08	9.01e-05	2.83e-07	2.5e-06	13	MYC,CDKN2A,MET,IGFBP3,TIMP1,TIMP3,KIAA1324,APC,AKT1,BCL2,TNF,PTEN,MDM2
GO: Biological Process	GO:0051301	cell division	2.53e-08	9.84e-05	3.05e-07	2.69e-06	13	TGFB1,MYC,CCNE1,CDKN2A,MET,PTTG1,IGF2,ESR1,APC,TNF,MSH2,FGFR2,CDK6
GO: Biological Process	GO:0046649	lymphocyte activation	5.1e-08	0.000198	5.76e-07	5.09e-06	13	TGFB1,CDKN2A,ERBB2,IGF2,BRAF,CD44,APC,AKT1,BCL2,MSH2,CTNNB1,MMP14,CDK6
GO: Biological Process	GO:0007420	brain development	1.06e-07	0.000412	1.11e-06	9.79e-06	13	KRAS,MET,BRCA1,EGFR,ESR2,BCL2,FGFR2,CTNNB1,PTEN,EZH2,CDH1,DNMT1,CDK6
GO: Biological Process	GO:0050767	regulation of neurogenesis	1.64e-07	0.000636	1.62e-06	1.44e-05	13	TGFB1,MYC,MET,BRAF,SPP1,AKT1,BCL2,CTNNB1,PTEN,MDM2,EZH2,TERT,CDH1
GO: Biological Process	GO:0000122	negative regulation of transcription by RNA polymerase II	2.25e-07	0.000875	2.17e-06	1.92e-05	13	TGFB1,MYC,MET,ESR1,ESR2,WT1,TNF,FGFR2,CTNNB1,RUNX3,MDM2,EZH2,DNMT1
GO: Biological Process	GO:0044087	regulation of cellular component biogenesis	3.11e-07	0.00121	2.84e-06	2.51e-05	13	TGFB1,CDKN1B,BRCA1,BRAF,CYR61,KIAA1324,APC,TNF,MMP1,CTNNB1,PTEN,MMP14,SDC1
GO: Biological Process	GO:0030163	protein catabolic process	3.81e-07	0.00148	3.42e-06	3.03e-05	13	CDKN1B,CDKN2A,PTTG1,EGFR,TIMP1,TIMP3,APC,AKT1,TNF,CTNNB1,PTEN,MDM2,SKP2
GO: Biological Process	GO:0043086	negative regulation of catalytic activity	5.9e-07	0.00229	5.06e-06	4.47e-05	13	CDKN1B,CDKN2A,PTTG1,SERPINB5,TIMP1,TIMP3,CD44,APC,AKT1,TNF,MMP9,PTEN,MDM2
GO: Biological Process	GO:0051345	positive regulation of hydrolase activity	1.13e-06	0.00438	8.91e-06	7.88e-05	13	MYC,CDKN1B,CDKN2A,ERBB2,CYR61,EGFR,ESR1,AKT1,TNF,MSH2,FGFR2,EZH2,MMP14
GO: Biological Process	GO:0051050	positive regulation of transport	4.91e-06	0.0191	3.2e-05	0.000283	13	TGFB1,MET,ERBB2,BRCA1,EGFR,AKT1,BCL2,TNF,MDM2,TERT,CDH1,SDC1,PTGS2
GO: Biological Process	GO:0006629	lipid metabolic process	7.77e-05	0.302	0.000376	0.00333	13	TGFB1,ERBB2,IGF2,BRCA1,CYR61,EGFR,ESR1,AKT1,TNF,FGFR2,PTEN,SDC1,PTGS2
GO: Biological Process	GO:0065003	macromolecular complex assembly	0.00121	1	0.00392	0.0347	13	TGFB1,MYC,CDKN1B,CDKN2A,BRAF,APC,TNF,MMP1,CTNNB1,MMP9,MDM2,TERT,CDH1
GO: Cellular Component	GO:0097458	neuron part	0.000196	0.0585	0.00193	0.0121	13	TGFB1,MYC,MET,BRAF,ESR1,ESR2,APC,CTNNB1,PTEN,CDH1,PTGS2,PGR,DNMT1
GO: Molecular Function	GO:0046983	protein dimerization activity	0.000213	0.0811	0.00189	0.0123	12	TGFB1,MYC,MET,ERBB2,BRAF,EGFR,BCL2,MSH2,FGFR2,CTNNB1,TERT,PTGS2
GO: Biological Process	GO:0007565	female pregnancy	6.33e-13	2.46e-09	1.97e-11	1.74e-10	12	TGFB1,IGF2,TIMP1,SPP1,ESR1,AKT1,BCL2,MMP2,MMP9,CDH1,PTGS2,PGR
GO: Biological Process	GO:0010948	negative regulation of cell cycle process	2.09e-12	8.1e-09	6e-11	5.31e-10	12	CDKN1B,PTTG1,BRCA1,RASSF1,ESR1,APC,BCL2,MSH2,FGFR2,PTEN,MDM2,EZH2
GO: Biological Process	GO:0000082	G1/S transition of mitotic cell cycle	2.93e-12	1.14e-08	8.24e-11	7.29e-10	12	CCNE1,CDKN1B,CDKN2A,EGFR,AKT1,BCL2,PTEN,MDM2,EZH2,SKP2,TERT,CDK6
GO: Biological Process	GO:0044706	multi-multicellular organism process	3.38e-12	1.31e-08	9.3e-11	8.22e-10	12	TGFB1,IGF2,TIMP1,SPP1,ESR1,AKT1,BCL2,MMP2,MMP9,CDH1,PTGS2,PGR
GO: Biological Process	GO:0044843	cell cycle G1/S phase transition	4.67e-12	1.81e-08	1.24e-10	1.1e-09	12	CCNE1,CDKN1B,CDKN2A,EGFR,AKT1,BCL2,PTEN,MDM2,EZH2,SKP2,TERT,CDK6
GO: Biological Process	GO:2000027	regulation of organ morphogenesis	7.64e-12	2.97e-08	1.94e-10	1.71e-09	12	TGFB1,MYC,CDKN2A,MET,ESR1,WT1,APC,BCL2,TNF,FGFR2,CTNNB1,CDH1
GO: Biological Process	GO:0007568	aging	3.87e-11	1.5e-07	9.33e-10	8.25e-09	12	TGFB1,CDKN2A,KRAS,TIMP1,TIMP3,AKT1,BCL2,MSH2,PTEN,TERT,DNMT1,CDK6
GO: Biological Process	GO:0001101	response to acid chemical	3.4e-10	1.32e-06	6.74e-09	5.96e-08	12	CDKN1B,SPARC,EGFR,TIMP3,ESR2,AKT1,BCL2,TNF,MMP2,CDH1,PTGS2,DNMT1
GO: Biological Process	GO:1903829	positive regulation of cellular protein localization	4.74e-10	1.84e-06	8.99e-09	7.95e-08	12	TGFB1,CDKN2A,ERBB2,BRCA1,EGFR,AKT1,BCL2,TNF,MDM2,TERT,CDH1,PTGS2
GO: Biological Process	GO:2001233	regulation of apoptotic signaling pathway	1e-09	3.89e-06	1.71e-08	1.52e-07	12	MYC,BRCA1,TIMP3,CD44,AKT1,BCL2,TNF,CTNNB1,MMP9,RUNX3,PTEN,TERT
GO: Biological Process	GO:0006979	response to oxidative stress	2.23e-09	8.66e-06	3.42e-08	3.03e-07	12	CDKN2A,MET,AKT1,BCL2,TNF,MMP2,MMP9,MDM2,EZH2,MMP14,SDC1,PTGS2
GO: Biological Process	GO:0001525	angiogenesis	4.15e-09	1.61e-05	6.04e-08	5.34e-07	12	ERBB2,SPARC,BRCA1,CYR61,FGFR2,MMP2,CTNNB1,MMP9,PTEN,MMP14,TERT,PTGS2
GO: Biological Process	GO:0045860	positive regulation of protein kinase activity	8.75e-09	3.4e-05	1.17e-07	1.04e-06	12	TGFB1,CDKN1B,KRAS,MET,ERBB2,IGF2,BRAF,CYR61,EGFR,AKT1,TNF,EZH2
GO: Biological Process	GO:0033674	positive regulation of kinase activity	1.83e-08	7.09e-05	2.28e-07	2.02e-06	12	TGFB1,CDKN1B,KRAS,MET,ERBB2,IGF2,BRAF,CYR61,EGFR,AKT1,TNF,EZH2
GO: Biological Process	GO:0007159	leukocyte cell-cell adhesion	2.64e-08	0.000103	3.16e-07	2.8e-06	12	TGFB1,CDKN2A,ERBB2,IGF2,BRAF,CD44,APC,AKT1,BCL2,TNF,CTNNB1,CDK6
GO: Biological Process	GO:0007507	heart development	6.27e-08	0.000244	6.86e-07	6.06e-06	12	TGFB1,MET,ERBB2,SPARC,CYR61,WT1,FGFR2,MMP2,CTNNB1,MMP9,PTEN,MDM2
GO: Biological Process	GO:0048589	developmental growth	2.47e-07	0.000958	2.34e-06	2.07e-05	12	TGFB1,CCNE1,IGF2,TIMP3,SPP1,ESR1,WT1,BCL2,FGFR2,CTNNB1,PTEN,EZH2
GO: Biological Process	GO:0016482	cytosolic transport	5.07e-07	0.00197	4.44e-06	3.93e-05	12	TGFB1,CDKN2A,BRCA1,BRAF,EGFR,BCL2,TNF,FGFR2,CTNNB1,MDM2,CDH1,PTGS2
GO: Biological Process	GO:0034097	response to cytokine	2.12e-06	0.00824	1.55e-05	0.000137	12	MYC,CCNE1,KRAS,SPARC,BRCA1,TIMP1,CD44,AKT1,BCL2,TNF,CTNNB1,PTGS2
GO: Biological Process	GO:0002684	positive regulation of immune system process	1.18e-05	0.046	7.09e-05	0.000627	12	TGFB1,KRAS,IGF2,ESR1,CD44,AKT1,BCL2,TNF,MMP2,MMP9,PTEN,MMP14
GO: Biological Process	GO:0044255	cellular lipid metabolic process	2.8e-05	0.109	0.000153	0.00135	12	TGFB1,ERBB2,BRCA1,CYR61,EGFR,ESR1,AKT1,TNF,FGFR2,PTEN,SDC1,PTGS2
GO: Biological Process	GO:0051276	chromosome organization	8.25e-05	0.32	0.000396	0.0035	12	TGFB1,MYC,CDKN2A,PTTG1,BRCA1,ESR1,APC,MSH2,CTNNB1,EZH2,TERT,DNMT1
GO: Biological Process	GO:0050877	nervous system process	0.000393	1	0.00151	0.0133	12	MYC,CDKN1B,KRAS,IGF2,BRAF,EGFR,TIMP3,ESR2,TNF,PTEN,CDH1,PTGS2
GO: Biological Process	GO:0006461	protein complex assembly	0.00102	1	0.00336	0.0297	12	TGFB1,MYC,CDKN1B,BRAF,APC,TNF,MMP1,CTNNB1,MMP9,MDM2,TERT,CDH1
GO: Biological Process	GO:0070271	protein complex biogenesis	0.00102	1	0.00336	0.0297	12	TGFB1,MYC,CDKN1B,BRAF,APC,TNF,MMP1,CTNNB1,MMP9,MDM2,TERT,CDH1
GO: Cellular Component	GO:0005694	chromosome	6.47e-06	0.00193	0.000241	0.00151	12	MYC,CDKN2A,IGFBP3,BRCA1,ESR1,APC,MSH2,CTNNB1,RUNX3,EZH2,TERT,DNMT1
GO: Cellular Component	GO:0043005	neuron projection	6.87e-05	0.0205	0.00089	0.00559	12	TGFB1,MYC,MET,BRAF,ESR1,ESR2,APC,CTNNB1,PTEN,CDH1,PTGS2,PGR
GO: Molecular Function	GO:0003690	double-stranded DNA binding	1.32e-05	0.00503	0.00036	0.00235	11	MYC,EGFR,ESR1,ESR2,WT1,MSH2,CTNNB1,RUNX3,EZH2,PGR,DNMT1
GO: Molecular Function	GO:0043565	sequence-specific DNA binding	0.000178	0.0678	0.00169	0.0111	11	MYC,ESR1,ESR2,WT1,BCL2,MSH2,RUNX3,EZH2,TERT,PGR,DNMT1
GO: Molecular Function	GO:0004871	signal transducer activity	0.00911	1	0.0261	0.17	11	CDKN1B,MET,ERBB2,BRAF,EGFR,ESR1,ESR2,CD44,FGFR2,CTNNB1,PGR
GO: Biological Process	GO:0050680	negative regulation of epithelial cell proliferation	5.91e-14	2.3e-10	2.09e-12	1.85e-11	11	TGFB1,CDKN1B,CDKN2A,SPARC,ESR2,APC,FGFR2,RUNX3,PTEN,CDH1,CDK6
GO: Biological Process	GO:0002064	epithelial cell development	6.4e-11	2.49e-07	1.5e-09	1.33e-08	11	MET,ESR1,ESR2,WT1,TNF,FGFR2,CTNNB1,CDH1,SDC1,PGR,CDK6
GO: Biological Process	GO:0072593	reactive oxygen species metabolic process	1.26e-10	4.88e-07	2.77e-09	2.45e-08	11	TGFB1,MET,BRCA1,CYR61,EGFR,ESR1,ESR2,AKT1,BCL2,TNF,PTGS2
GO: Biological Process	GO:0070372	regulation of ERK1 and ERK2 cascade	1.67e-10	6.47e-07	3.56e-09	3.14e-08	11	ERBB2,BRAF,CYR61,EGFR,TIMP3,ESR1,ESR2,CD44,TNF,FGFR2,PTEN
GO: Biological Process	GO:0070371	ERK1 and ERK2 cascade	2.97e-10	1.15e-06	6e-09	5.31e-08	11	ERBB2,BRAF,CYR61,EGFR,TIMP3,ESR1,ESR2,CD44,TNF,FGFR2,PTEN
GO: Biological Process	GO:0051146	striated muscle cell differentiation	3.57e-10	1.39e-06	7.04e-09	6.23e-08	11	TGFB1,KRAS,MET,IGF2,GDF15,WT1,AKT1,BCL2,EZH2,MMP14,SDC1
GO: Biological Process	GO:0071383	cellular response to steroid hormone stimulus	3.7e-10	1.44e-06	7.27e-09	6.43e-08	11	TGFB1,CCNE1,BRCA1,EGFR,ESR1,ESR2,MMP2,CTNNB1,MDM2,SKP2,PGR
GO: Biological Process	GO:0007548	sex differentiation	7.25e-10	2.82e-06	1.29e-08	1.14e-07	11	CCNE1,ESR1,ESR2,WT1,BCL2,MSH2,MMP2,CTNNB1,MMP14,SDC1,PGR
GO: Biological Process	GO:0001666	response to hypoxia	8.03e-10	3.12e-06	1.42e-08	1.25e-07	11	TGFB1,CDKN1B,NDRG1,AKT1,BCL2,MMP2,PTEN,MDM2,MMP14,TERT,PTGS2
GO: Biological Process	GO:1901990	regulation of mitotic cell cycle phase transition	9.81e-10	3.81e-06	1.69e-08	1.49e-07	11	TGFB1,CDKN1B,CDKN2A,EGFR,APC,AKT1,BCL2,PTEN,MDM2,EZH2,TERT
GO: Biological Process	GO:0036293	response to decreased oxygen levels	1.08e-09	4.21e-06	1.82e-08	1.61e-07	11	TGFB1,CDKN1B,NDRG1,AKT1,BCL2,MMP2,PTEN,MDM2,MMP14,TERT,PTGS2
GO: Biological Process	GO:1901987	regulation of cell cycle phase transition	1.86e-09	7.23e-06	2.95e-08	2.61e-07	11	TGFB1,CDKN1B,CDKN2A,EGFR,APC,AKT1,BCL2,PTEN,MDM2,EZH2,TERT
GO: Biological Process	GO:0070482	response to oxygen levels	1.86e-09	7.23e-06	2.95e-08	2.61e-07	11	TGFB1,CDKN1B,NDRG1,AKT1,BCL2,MMP2,PTEN,MDM2,MMP14,TERT,PTGS2
GO: Biological Process	GO:0008544	epidermis development	1.98e-09	7.69e-06	3.08e-08	2.72e-07	11	CDKN2A,EGFR,APC,AKT1,BCL2,TNF,FGFR2,CTNNB1,RUNX3,EZH2,PTGS2
GO: Biological Process	GO:0030098	lymphocyte differentiation	3.2e-09	1.24e-05	4.71e-08	4.17e-07	11	TGFB1,CDKN2A,ERBB2,BRAF,CD44,APC,BCL2,MSH2,CTNNB1,MMP14,CDK6
GO: Biological Process	GO:0048511	rhythmic process	4.27e-09	1.66e-05	6.13e-08	5.42e-07	11	CCNE1,ERBB2,EGFR,ESR1,ESR2,BCL2,MMP2,PTEN,EZH2,MMP14,PGR
GO: Biological Process	GO:0045861	negative regulation of proteolysis	4.27e-09	1.66e-05	6.13e-08	5.42e-07	11	CDKN2A,PTTG1,SERPINB5,TIMP1,TIMP3,CD44,APC,AKT1,MMP9,MDM2,CDH1
GO: Biological Process	GO:0051052	regulation of DNA metabolic process	4.52e-09	1.76e-05	6.43e-08	5.69e-07	11	TGFB1,MYC,CDKN2A,MET,IGFBP3,BRCA1,EGFR,AKT1,MSH2,CTNNB1,DNMT1
GO: Biological Process	GO:0034504	protein localization to nucleus	8.48e-09	3.29e-05	1.14e-07	1.01e-06	11	TGFB1,CDKN2A,BRCA1,EGFR,AKT1,TNF,CTNNB1,MDM2,TERT,CDH1,PTGS2
GO: Biological Process	GO:0045785	positive regulation of cell adhesion	2e-08	7.78e-05	2.49e-07	2.2e-06	11	TGFB1,ERBB2,IGF2,BRAF,CYR61,SPP1,CD44,APC,AKT1,TNF,CDK6
GO: Biological Process	GO:0042110	T cell activation	1.18e-07	0.000458	1.22e-06	1.08e-05	11	TGFB1,CDKN2A,ERBB2,IGF2,BRAF,CD44,APC,AKT1,BCL2,CTNNB1,CDK6
GO: Biological Process	GO:0070489	T cell aggregation	1.18e-07	0.000458	1.22e-06	1.08e-05	11	TGFB1,CDKN2A,ERBB2,IGF2,BRAF,CD44,APC,AKT1,BCL2,CTNNB1,CDK6
GO: Biological Process	GO:0071593	lymphocyte aggregation	1.2e-07	0.000467	1.23e-06	1.09e-05	11	TGFB1,CDKN2A,ERBB2,IGF2,BRAF,CD44,APC,AKT1,BCL2,CTNNB1,CDK6
GO: Biological Process	GO:0070486	leukocyte aggregation	1.38e-07	0.000537	1.39e-06	1.23e-05	11	TGFB1,CDKN2A,ERBB2,IGF2,BRAF,CD44,APC,AKT1,BCL2,CTNNB1,CDK6
GO: Biological Process	GO:0007423	sensory organ development	5.84e-07	0.00227	5.02e-06	4.43e-05	11	TGFB1,MYC,CDKN1B,SPARC,EGFR,WT1,APC,BCL2,FGFR2,CTNNB1,CDH1
GO: Biological Process	GO:0045936	negative regulation of phosphate metabolic process	6.34e-07	0.00246	5.36e-06	4.74e-05	11	TGFB1,MYC,CDKN1B,CDKN2A,MET,IGFBP3,TIMP3,APC,AKT1,TNF,PTEN
GO: Biological Process	GO:0010563	negative regulation of phosphorus metabolic process	6.34e-07	0.00246	5.36e-06	4.74e-05	11	TGFB1,MYC,CDKN1B,CDKN2A,MET,IGFBP3,TIMP3,APC,AKT1,TNF,PTEN
GO: Biological Process	GO:0048812	neuron projection morphogenesis	1.04e-06	0.00404	8.32e-06	7.35e-05	11	KRAS,MET,ERBB2,BRAF,EGFR,SPP1,APC,BCL2,FGFR2,RUNX3,PTEN
GO: Biological Process	GO:0032386	regulation of intracellular transport	1.92e-06	0.00747	1.43e-05	0.000126	11	TGFB1,CDKN2A,ERBB2,BRCA1,BRAF,EGFR,BCL2,TNF,MDM2,CDH1,PTGS2
GO: Biological Process	GO:0072594	establishment of protein localization to organelle	2.07e-06	0.00803	1.52e-05	0.000134	11	TGFB1,CDKN2A,BRCA1,EGFR,AKT1,BCL2,TNF,CTNNB1,TERT,CDH1,PTGS2
GO: Biological Process	GO:0070201	regulation of establishment of protein localization	2.87e-05	0.112	0.000156	0.00138	11	TGFB1,CDKN2A,ERBB2,BRCA1,EGFR,AKT1,BCL2,TNF,MDM2,CDH1,PTGS2
GO: Biological Process	GO:0048858	cell projection morphogenesis	3.22e-05	0.125	0.000171	0.00152	11	KRAS,MET,ERBB2,BRAF,EGFR,SPP1,APC,BCL2,FGFR2,RUNX3,PTEN
GO: Biological Process	GO:0032990	cell part morphogenesis	3.97e-05	0.154	0.000207	0.00183	11	KRAS,MET,ERBB2,BRAF,EGFR,SPP1,APC,BCL2,FGFR2,RUNX3,PTEN
GO: Biological Process	GO:0032101	regulation of response to external stimulus	9.1e-05	0.354	0.000431	0.00381	11	TGFB1,MET,BRAF,EGFR,SPP1,ESR1,KIAA1324,CD44,TNF,PTEN,PTGS2
GO: Biological Process	GO:0061024	membrane organization	0.000174	0.676	0.00074	0.00654	11	TGFB1,MYC,ERBB2,NDRG1,BRAF,EGFR,AKT1,BCL2,TNF,PTEN,CDH1
GO: Biological Process	GO:0006886	intracellular protein transport	0.000195	0.756	0.000817	0.00722	11	TGFB1,CDKN2A,ERBB2,BRCA1,EGFR,AKT1,TNF,CTNNB1,MDM2,CDH1,PTGS2
GO: Biological Process	GO:0016192	vesicle-mediated transport	0.00266	1	0.00775	0.0686	11	TGFB1,SPARC,IGF2,BRAF,TIMP1,TIMP3,TNF,FGFR2,CTNNB1,PTEN,SDC1
GO: Biological Process	GO:0015031	protein transport	0.017	1	0.0318	0.281	11	TGFB1,CDKN2A,ERBB2,BRCA1,EGFR,AKT1,TNF,CTNNB1,MDM2,CDH1,PTGS2
GO: Cellular Component	GO:0031012	extracellular matrix	2.48e-08	7.38e-06	7.38e-06	4.63e-05	11	TGFB1,SPARC,CYR61,TIMP1,TIMP3,FGFR2,MMP1,MMP2,MMP9,MMP12,MMP14
GO: Cellular Component	GO:0044427	chromosomal part	1.3e-05	0.00387	0.000352	0.00221	11	MYC,CDKN2A,IGFBP3,ESR1,APC,MSH2,CTNNB1,RUNX3,EZH2,TERT,DNMT1
GO: Cellular Component	GO:0045202	synapse	1.82e-05	0.00543	0.000408	0.00256	11	MET,ERBB2,EGFR,ESR1,APC,AKT1,FGFR2,CTNNB1,PTEN,MDM2,PGR
GO: Cellular Component	GO:0098589	membrane region	0.000516	0.154	0.00386	0.0242	11	KRAS,MET,ERBB2,EGFR,CD44,APC,TNF,CTNNB1,PTEN,CDH1,PTGS2
GO: Cellular Component	GO:0031410	cytoplasmic vesicle	0.000904	0.269	0.00568	0.0357	11	TGFB1,ERBB2,SPARC,IGF2,EGFR,TIMP1,TIMP3,TNF,FGFR2,MDM2,MMP14
GO: Cellular Component	GO:0097708	intracellular vesicle	0.000915	0.273	0.00568	0.0357	11	TGFB1,ERBB2,SPARC,IGF2,EGFR,TIMP1,TIMP3,TNF,FGFR2,MDM2,MMP14
GO: Molecular Function	GO:0019901	protein kinase binding	6.84e-06	0.00261	0.000217	0.00142	10	CCNE1,CDKN2A,BRAF,EGFR,CD44,APC,AKT1,MSH2,CTNNB1,PTEN
GO: Molecular Function	GO:0019900	kinase binding	1.76e-05	0.0067	0.000363	0.00237	10	CCNE1,CDKN2A,BRAF,EGFR,CD44,APC,AKT1,MSH2,CTNNB1,PTEN
GO: Molecular Function	GO:0044212	transcription regulatory region DNA binding	0.000111	0.0424	0.0013	0.0085	10	MYC,BRCA1,ESR1,ESR2,WT1,TNF,CTNNB1,RUNX3,EZH2,PGR
GO: Molecular Function	GO:0001067	regulatory region nucleic acid binding	0.000118	0.0449	0.0013	0.0085	10	MYC,BRCA1,ESR1,ESR2,WT1,TNF,CTNNB1,RUNX3,EZH2,PGR
GO: Biological Process	GO:0030850	prostate gland development	4.5e-16	1.75e-12	2.24e-14	1.98e-13	10	CDKN1B,SERPINB5,ESR1,ESR2,CD44,APC,FGFR2,MMP2,CTNNB1,PTEN
GO: Biological Process	GO:0022617	extracellular matrix disassembly	6.99e-14	2.71e-10	2.42e-12	2.14e-11	10	TGFB1,TIMP1,SPP1,CD44,MMP1,MMP2,MMP9,MMP12,MMP14,CDH1
GO: Biological Process	GO:0042633	hair cycle	1.06e-12	4.12e-09	3.22e-11	2.85e-10	10	EGFR,APC,AKT1,BCL2,TNF,FGFR2,CTNNB1,RUNX3,TERT,PTGS2
GO: Biological Process	GO:0042303	molting cycle	1.06e-12	4.12e-09	3.22e-11	2.85e-10	10	EGFR,APC,AKT1,BCL2,TNF,FGFR2,CTNNB1,RUNX3,TERT,PTGS2
GO: Biological Process	GO:0007584	response to nutrient	2.68e-10	1.04e-06	5.51e-09	4.87e-08	10	TGFB1,CCNE1,SPARC,BRCA1,TIMP3,SPP1,PTEN,MDM2,PTGS2,DNMT1
GO: Biological Process	GO:0043281	regulation of cysteine-type endopeptidase activity involved in apoptotic process	4.63e-10	1.8e-06	8.81e-09	7.79e-08	10	MYC,CDKN1B,CDKN2A,CYR61,CD44,AKT1,TNF,MMP9,MDM2,CDH1
GO: Biological Process	GO:0001649	osteoblast differentiation	5.05e-10	1.96e-06	9.43e-09	8.34e-08	10	IGFBP3,CYR61,SPP1,ESR1,APC,AKT1,TNF,FGFR2,CTNNB1,CDK6
GO: Biological Process	GO:2000116	regulation of cysteine-type endopeptidase activity	8.07e-10	3.13e-06	1.42e-08	1.25e-07	10	MYC,CDKN1B,CDKN2A,CYR61,CD44,AKT1,TNF,MMP9,MDM2,CDH1
GO: Biological Process	GO:0007050	cell cycle arrest	1.36e-09	5.29e-06	2.23e-08	1.98e-07	10	TGFB1,MYC,CDKN1B,CDKN2A,BRCA1,RASSF1,APC,MSH2,MDM2,CDK6
GO: Biological Process	GO:0008406	gonad development	1.59e-09	6.18e-06	2.57e-08	2.27e-07	10	CCNE1,ESR1,ESR2,WT1,BCL2,MSH2,MMP2,MMP14,SDC1,PGR
GO: Biological Process	GO:0045137	development of primary sexual characteristics	1.93e-09	7.48e-06	3.03e-08	2.68e-07	10	CCNE1,ESR1,ESR2,WT1,BCL2,MSH2,MMP2,MMP14,SDC1,PGR
GO: Biological Process	GO:0090068	positive regulation of cell cycle process	2.16e-09	8.37e-06	3.32e-08	2.94e-07	10	TGFB1,CDKN1B,CDKN2A,MET,IGF2,NDRG1,BRCA1,TNF,MDM2,TERT
GO: Biological Process	GO:0009636	response to toxic substance	3.1e-09	1.21e-05	4.58e-08	4.05e-07	10	CDKN1B,ESR2,BCL2,TNF,MDM2,EZH2,CDH1,SDC1,PTGS2,DNMT1
GO: Biological Process	GO:0071496	cellular response to external stimulus	6.38e-09	2.48e-05	8.85e-08	7.83e-07	10	CCNE1,IGF2,KIAA1324,AKT1,BCL2,CTNNB1,MMP9,MDM2,SKP2,PTGS2
GO: Biological Process	GO:0051302	regulation of cell division	6.59e-09	2.56e-05	9.08e-08	8.03e-07	10	TGFB1,MYC,MET,PTTG1,IGF2,ESR1,APC,TNF,MSH2,FGFR2
GO: Biological Process	GO:1901214	regulation of neuron death	1.1e-08	4.27e-05	1.47e-07	1.3e-06	10	KRAS,BRAF,ESR1,ESR2,AKT1,BCL2,TNF,MSH2,CTNNB1,TERT
GO: Biological Process	GO:0071902	positive regulation of protein serine/threonine kinase activity	1.68e-08	6.52e-05	2.14e-07	1.89e-06	10	TGFB1,CDKN1B,KRAS,MET,ERBB2,IGF2,EGFR,AKT1,TNF,EZH2
GO: Biological Process	GO:0031589	cell-substrate adhesion	1.73e-08	6.71e-05	2.18e-07	1.92e-06	10	CDKN2A,BRAF,CYR61,SPP1,CD44,BCL2,CTNNB1,PTEN,MMP14,CDK6
GO: Biological Process	GO:0070997	neuron death	3.41e-08	0.000132	4.05e-07	3.58e-06	10	KRAS,BRAF,ESR1,ESR2,AKT1,BCL2,TNF,MSH2,CTNNB1,TERT
GO: Biological Process	GO:0001667	ameboidal-type cell migration	3.5e-08	0.000136	4.15e-07	3.67e-06	10	TGFB1,MET,SPARC,BRAF,TIMP1,AKT1,MMP1,MMP9,PTEN,PTGS2
GO: Biological Process	GO:1903706	regulation of hemopoiesis	6.39e-08	0.000248	6.94e-07	6.13e-06	10	TGFB1,MYC,CDKN2A,ERBB2,CD44,APC,TNF,CTNNB1,MMP14,CDK6
GO: Biological Process	GO:0051090	regulation of DNA binding transcription factor activity	1.18e-07	0.000457	1.22e-06	1.08e-05	10	TGFB1,CDKN2A,KRAS,ESR1,ESR2,AKT1,TNF,CTNNB1,PTEN,EZH2
GO: Biological Process	GO:0042176	regulation of protein catabolic process	1.82e-07	0.000706	1.78e-06	1.57e-05	10	CDKN1B,CDKN2A,EGFR,TIMP1,TIMP3,APC,AKT1,TNF,PTEN,MDM2
GO: Biological Process	GO:0001933	negative regulation of protein phosphorylation	2.37e-07	0.00092	2.27e-06	2e-05	10	TGFB1,MYC,CDKN1B,CDKN2A,MET,IGFBP3,TIMP3,APC,AKT1,PTEN
GO: Biological Process	GO:0042326	negative regulation of phosphorylation	6.18e-07	0.0024	5.28e-06	4.67e-05	10	TGFB1,MYC,CDKN1B,CDKN2A,MET,IGFBP3,TIMP3,APC,AKT1,PTEN
GO: Biological Process	GO:1902532	negative regulation of intracellular signal transduction	8.52e-07	0.00331	6.98e-06	6.17e-05	10	MYC,TIMP3,ESR1,CD44,APC,AKT1,BCL2,MMP9,PTEN,MDM2
GO: Biological Process	GO:0032844	regulation of homeostatic process	9e-07	0.0035	7.35e-06	6.5e-05	10	TGFB1,MYC,EGFR,SPP1,CD44,BCL2,TNF,CTNNB1,PTGS2,CDK6
GO: Biological Process	GO:0016055	Wnt signaling pathway	9.17e-07	0.00356	7.41e-06	6.55e-05	10	MYC,CCNE1,CD44,APC,FGFR2,CTNNB1,PTEN,TERT,CDH1,SDC1
GO: Biological Process	GO:0006913	nucleocytoplasmic transport	9.17e-07	0.00356	7.41e-06	6.55e-05	10	TGFB1,CDKN2A,BRCA1,EGFR,AKT1,TNF,CTNNB1,MDM2,CDH1,PTGS2
GO: Biological Process	GO:0051169	nuclear transport	1.06e-06	0.00412	8.44e-06	7.47e-05	10	TGFB1,CDKN2A,BRCA1,EGFR,AKT1,TNF,CTNNB1,MDM2,CDH1,PTGS2
GO: Biological Process	GO:0061564	axon development	1.31e-06	0.0051	1.03e-05	9.07e-05	10	KRAS,ERBB2,BRAF,SPP1,APC,BCL2,FGFR2,MMP2,RUNX3,PTEN
GO: Biological Process	GO:1903649	regulation of cytoplasmic transport	1.43e-06	0.00556	1.11e-05	9.78e-05	10	TGFB1,CDKN2A,BRCA1,BRAF,EGFR,BCL2,TNF,MDM2,CDH1,PTGS2
GO: Biological Process	GO:0051051	negative regulation of transport	1.59e-06	0.00617	1.22e-05	0.000107	10	TGFB1,MYC,BRAF,ESR1,AKT1,BCL2,TNF,MMP9,PTEN,PTGS2
GO: Biological Process	GO:1904951	positive regulation of establishment of protein localization	3.06e-06	0.0119	2.14e-05	0.000189	10	TGFB1,ERBB2,BRCA1,EGFR,AKT1,BCL2,TNF,MDM2,CDH1,PTGS2
GO: Biological Process	GO:0048667	cell morphogenesis involved in neuron differentiation	4.5e-06	0.0175	2.96e-05	0.000262	10	KRAS,MET,ERBB2,BRAF,SPP1,APC,BCL2,FGFR2,RUNX3,PTEN
GO: Biological Process	GO:0007610	behavior	1.39e-05	0.0539	8.23e-05	0.000728	10	KRAS,MET,IGF2,BRAF,EGFR,ESR2,BCL2,PTEN,PTGS2,PGR
GO: Biological Process	GO:0098916	anterograde trans-synaptic signaling	1.52e-05	0.059	8.91e-05	0.000788	10	KRAS,MET,BRAF,EGFR,AKT1,TNF,CTNNB1,MMP9,PTEN,PTGS2
GO: Biological Process	GO:0007268	chemical synaptic transmission	1.52e-05	0.059	8.91e-05	0.000788	10	KRAS,MET,BRAF,EGFR,AKT1,TNF,CTNNB1,MMP9,PTEN,PTGS2
GO: Biological Process	GO:0099537	trans-synaptic signaling	1.52e-05	0.059	8.91e-05	0.000788	10	KRAS,MET,BRAF,EGFR,AKT1,TNF,CTNNB1,MMP9,PTEN,PTGS2
GO: Biological Process	GO:0099536	synaptic signaling	1.7e-05	0.0661	9.86e-05	0.000872	10	KRAS,MET,BRAF,EGFR,AKT1,TNF,CTNNB1,MMP9,PTEN,PTGS2
GO: Biological Process	GO:0006605	protein targeting	2.64e-05	0.103	0.000145	0.00128	10	TGFB1,CDKN2A,ERBB2,BRCA1,EGFR,AKT1,TNF,CTNNB1,CDH1,PTGS2
GO: Biological Process	GO:0019953	sexual reproduction	0.00011	0.428	0.000509	0.0045	10	TGFB1,PTTG1,WT1,AKT1,BCL2,MSH2,CTNNB1,PTEN,PTGS2,PGR
GO: Biological Process	GO:0032446	protein modification by small protein conjugation	0.000169	0.656	0.000724	0.0064	10	CDKN2A,PTTG1,BRCA1,RASSF1,AKT1,BCL2,CTNNB1,PTEN,MDM2,SKP2
GO: Biological Process	GO:0070647	protein modification by small protein conjugation or removal	0.00047	1	0.00174	0.0154	10	CDKN2A,PTTG1,BRCA1,RASSF1,AKT1,BCL2,CTNNB1,PTEN,MDM2,SKP2
GO: Biological Process	GO:0007010	cytoskeleton organization	0.00125	1	0.00402	0.0356	10	TGFB1,CDKN1B,KRAS,BRCA1,BRAF,APC,AKT1,BCL2,TNF,CTNNB1
GO: Biological Process	GO:0046903	secretion	0.00186	1	0.00568	0.0502	10	TGFB1,MYC,SPARC,IGF2,BRAF,EGFR,TIMP1,TIMP3,TNF,SDC1
GO: Biological Process	GO:1901566	organonitrogen compound biosynthetic process	0.00598	1	0.0145	0.128	10	TGFB1,MYC,ERBB2,CYR61,EGFR,ESR1,WT1,AKT1,TNF,SDC1
GO: Biological Process	GO:0006955	immune response	0.0107	1	0.0232	0.205	10	TGFB1,KRAS,IGF2,ESR1,CD44,BCL2,TNF,MSH2,MMP2,PTEN
GO: Cellular Component	GO:0048471	perinuclear region of cytoplasm	2.19e-05	0.00652	0.000408	0.00256	10	MYC,ERBB2,NDRG1,EGFR,SPP1,ESR1,ESR2,BCL2,CTNNB1,CDH1
GO: Cellular Component	GO:0030054	cell junction	0.00132	0.392	0.00785	0.0493	10	KRAS,NDRG1,EGFR,CD44,APC,AKT1,CTNNB1,MMP14,CDH1,SDC1
GO: Cellular Component	GO:0044430	cytoskeletal part	0.00726	1	0.0238	0.149	10	MYC,CCNE1,NDRG1,BRCA1,RASSF1,APC,AKT1,CTNNB1,CDH1,CDK6
GO: Molecular Function	GO:0016772	transferase activity, transferring phosphorus-containing groups	0.00168	0.64	0.00821	0.0536	9	CCNE1,MET,ERBB2,BRAF,EGFR,AKT1,FGFR2,TERT,CDK6
GO: Molecular Function	GO:0003700	DNA binding transcription factor activity	0.00763	1	0.0244	0.159	9	MYC,CDKN2A,PTTG1,ESR1,ESR2,WT1,CTNNB1,RUNX3,PGR
GO: Molecular Function	GO:0005524	ATP binding	0.0196	1	0.0455	0.297	9	MET,ERBB2,BRAF,EGFR,AKT1,MSH2,FGFR2,RUNX3,CDK6
GO: Biological Process	GO:0001942	hair follicle development	7.12e-12	2.77e-08	1.85e-10	1.63e-09	9	EGFR,APC,AKT1,BCL2,TNF,FGFR2,CTNNB1,RUNX3,PTGS2
GO: Biological Process	GO:0022404	molting cycle process	7.12e-12	2.77e-08	1.85e-10	1.63e-09	9	EGFR,APC,AKT1,BCL2,TNF,FGFR2,CTNNB1,RUNX3,PTGS2
GO: Biological Process	GO:0022405	hair cycle process	7.12e-12	2.77e-08	1.85e-10	1.63e-09	9	EGFR,APC,AKT1,BCL2,TNF,FGFR2,CTNNB1,RUNX3,PTGS2
GO: Biological Process	GO:0098773	skin epidermis development	8.56e-12	3.33e-08	2.16e-10	1.91e-09	9	EGFR,APC,AKT1,BCL2,TNF,FGFR2,CTNNB1,RUNX3,PTGS2
GO: Biological Process	GO:0042698	ovulation cycle	1.45e-10	5.65e-07	3.14e-09	2.78e-08	9	CCNE1,ERBB2,EGFR,ESR1,ESR2,BCL2,MMP2,MMP14,PGR
GO: Biological Process	GO:1900182	positive regulation of protein localization to nucleus	1.45e-10	5.65e-07	3.14e-09	2.78e-08	9	TGFB1,CDKN2A,BRCA1,EGFR,AKT1,TNF,TERT,CDH1,PTGS2
GO: Biological Process	GO:0001890	placenta development	7.17e-10	2.79e-06	1.28e-08	1.13e-07	9	MET,CYR61,EGFR,SPP1,ESR1,AKT1,FGFR2,CDH1,PTGS2
GO: Biological Process	GO:0051147	regulation of muscle cell differentiation	1.04e-09	4.03e-06	1.76e-08	1.56e-07	9	TGFB1,IGFBP3,GDF15,BCL2,TNF,FGFR2,CTNNB1,EZH2,MMP14
GO: Biological Process	GO:0050679	positive regulation of epithelial cell proliferation	1.21e-09	4.7e-06	2.02e-08	1.78e-07	9	TGFB1,MYC,ERBB2,EGFR,ESR1,AKT1,FGFR2,CTNNB1,MMP12
GO: Biological Process	GO:0051384	response to glucocorticoid	1.34e-09	5.19e-06	2.2e-08	1.95e-07	9	TGFB1,CCNE1,KRAS,SPARC,ESR2,BCL2,TNF,SDC1,PTGS2
GO: Biological Process	GO:2000377	regulation of reactive oxygen species metabolic process	1.34e-09	5.19e-06	2.2e-08	1.95e-07	9	TGFB1,BRCA1,EGFR,ESR1,ESR2,AKT1,BCL2,TNF,PTGS2
GO: Biological Process	GO:0051783	regulation of nuclear division	1.34e-09	5.19e-06	2.2e-08	1.95e-07	9	TGFB1,MET,PTTG1,IGF2,ESR1,APC,TNF,MSH2,FGFR2
GO: Biological Process	GO:0048771	tissue remodeling	1.63e-09	6.33e-06	2.61e-08	2.31e-07	9	TGFB1,CDKN2A,EGFR,SPP1,MMP2,CTNNB1,MMP9,MDM2,MMP14
GO: Biological Process	GO:0031960	response to corticosteroid	2.5e-09	9.7e-06	3.77e-08	3.34e-07	9	TGFB1,CCNE1,KRAS,SPARC,ESR2,BCL2,TNF,SDC1,PTGS2
GO: Biological Process	GO:0031099	regeneration	4.27e-09	1.66e-05	6.13e-08	5.42e-07	9	TGFB1,CCNE1,BRAF,TIMP3,SPP1,BCL2,MMP2,PTEN,EZH2
GO: Biological Process	GO:1901215	negative regulation of neuron death	4.66e-09	1.81e-05	6.61e-08	5.84e-07	9	KRAS,BRAF,ESR1,ESR2,AKT1,BCL2,MSH2,CTNNB1,TERT
GO: Biological Process	GO:0010001	glial cell differentiation	6e-09	2.33e-05	8.36e-08	7.39e-07	9	TGFB1,KRAS,ERBB2,NDRG1,EGFR,AKT1,CTNNB1,PTEN,CDK6
GO: Biological Process	GO:1900180	regulation of protein localization to nucleus	1.6e-08	6.21e-05	2.06e-07	1.82e-06	9	TGFB1,CDKN2A,BRCA1,EGFR,AKT1,TNF,TERT,CDH1,PTGS2
GO: Biological Process	GO:0043523	regulation of neuron apoptotic process	1.66e-08	6.44e-05	2.12e-07	1.87e-06	9	KRAS,BRAF,ESR1,ESR2,BCL2,TNF,MSH2,CTNNB1,TERT
GO: Biological Process	GO:0009612	response to mechanical stimulus	1.66e-08	6.44e-05	2.12e-07	1.87e-06	9	MYC,IGF2,TIMP3,AKT1,TNF,MMP2,CTNNB1,MMP14,PTGS2
GO: Biological Process	GO:0009895	negative regulation of catabolic process	1.72e-08	6.68e-05	2.18e-07	1.92e-06	9	CDKN2A,MET,EGFR,TIMP1,TIMP3,APC,AKT1,BCL2,TNF
GO: Biological Process	GO:0030217	T cell differentiation	2.29e-08	8.9e-05	2.81e-07	2.48e-06	9	TGFB1,CDKN2A,ERBB2,BRAF,CD44,APC,BCL2,CTNNB1,CDK6
GO: Biological Process	GO:0097191	extrinsic apoptotic signaling pathway	2.46e-08	9.55e-05	2.98e-07	2.63e-06	9	TGFB1,BRCA1,TIMP3,AKT1,BCL2,TNF,RUNX3,PTEN,TERT
GO: Biological Process	GO:0051091	positive regulation of DNA binding transcription factor activity	2.46e-08	9.55e-05	2.98e-07	2.63e-06	9	TGFB1,CDKN2A,KRAS,ESR1,ESR2,AKT1,TNF,CTNNB1,PTEN
GO: Biological Process	GO:0051402	neuron apoptotic process	3.95e-08	0.000154	4.64e-07	4.1e-06	9	KRAS,BRAF,ESR1,ESR2,BCL2,TNF,MSH2,CTNNB1,TERT
GO: Biological Process	GO:0040029	regulation of gene expression, epigenetic	4.5e-08	0.000175	5.18e-07	4.58e-06	9	TGFB1,IGF2,BRCA1,EGFR,ESR1,CTNNB1,EZH2,TERT,DNMT1
GO: Biological Process	GO:0045926	negative regulation of growth	5.12e-08	0.000199	5.77e-07	5.1e-06	9	TGFB1,CDKN1B,CDKN2A,SPP1,ESR2,WT1,BCL2,TNF,PTEN
GO: Biological Process	GO:1902105	regulation of leukocyte differentiation	6.19e-08	0.00024	6.79e-07	6e-06	9	TGFB1,MYC,CDKN2A,ERBB2,CD44,APC,TNF,CTNNB1,MMP14
GO: Biological Process	GO:0021700	developmental maturation	6.19e-08	0.00024	6.79e-07	6e-06	9	ESR2,AKT1,BCL2,MMP2,CTNNB1,RUNX3,PTEN,PTGS2,PGR
GO: Biological Process	GO:0043588	skin development	6.79e-08	0.000264	7.32e-07	6.48e-06	9	EGFR,APC,AKT1,BCL2,TNF,FGFR2,CTNNB1,RUNX3,PTGS2
GO: Biological Process	GO:0001822	kidney development	1e-07	0.000389	1.05e-06	9.28e-06	9	TGFB1,MYC,CD44,WT1,APC,BCL2,FGFR2,CTNNB1,SDC1
GO: Biological Process	GO:0072001	renal system development	1.67e-07	0.000648	1.65e-06	1.46e-05	9	TGFB1,MYC,CD44,WT1,APC,BCL2,FGFR2,CTNNB1,SDC1
GO: Biological Process	GO:0009416	response to light stimulus	3.47e-07	0.00135	3.15e-06	2.78e-05	9	MYC,KRAS,BRAF,EGFR,AKT1,BCL2,MSH2,MDM2,PTGS2
GO: Biological Process	GO:0045862	positive regulation of proteolysis	9.67e-07	0.00376	7.76e-06	6.86e-05	9	MYC,CDKN1B,CDKN2A,CYR61,AKT1,TNF,PTEN,MDM2,MMP14
GO: Biological Process	GO:0032388	positive regulation of intracellular transport	1.33e-06	0.00517	1.04e-05	9.16e-05	9	TGFB1,ERBB2,BRCA1,EGFR,BCL2,TNF,MDM2,CDH1,PTGS2
GO: Biological Process	GO:0033157	regulation of intracellular protein transport	1.54e-06	0.00597	1.18e-05	0.000105	9	TGFB1,CDKN2A,ERBB2,BRCA1,EGFR,TNF,MDM2,CDH1,PTGS2
GO: Biological Process	GO:0030900	forebrain development	1.67e-06	0.00648	1.26e-05	0.000112	9	KRAS,EGFR,ESR2,FGFR2,CTNNB1,PTEN,EZH2,CDH1,CDK6
GO: Biological Process	GO:0009896	positive regulation of catabolic process	1.92e-06	0.00746	1.43e-05	0.000126	9	MYC,CDKN1B,IGFBP3,KIAA1324,APC,AKT1,TNF,PTEN,MDM2
GO: Biological Process	GO:0051346	negative regulation of hydrolase activity	2.04e-06	0.00791	1.5e-05	0.000133	9	PTTG1,SERPINB5,TIMP1,TIMP3,CD44,AKT1,TNF,MMP9,MDM2
GO: Biological Process	GO:0002683	negative regulation of immune system process	2.16e-06	0.00839	1.57e-05	0.000139	9	TGFB1,MYC,CDKN2A,ERBB2,IGF2,CD44,TNF,CTNNB1,CDK6
GO: Biological Process	GO:0022407	regulation of cell-cell adhesion	2.62e-06	0.0102	1.88e-05	0.000166	9	TGFB1,CDKN2A,ERBB2,IGF2,CD44,AKT1,TNF,CTNNB1,CDH1
GO: Biological Process	GO:0051249	regulation of lymphocyte activation	3.46e-06	0.0135	2.36e-05	0.000209	9	TGFB1,CDKN2A,ERBB2,IGF2,CD44,AKT1,BCL2,CTNNB1,MMP14
GO: Biological Process	GO:0044089	positive regulation of cellular component biogenesis	4.01e-06	0.0156	2.67e-05	0.000236	9	TGFB1,CDKN1B,BRAF,KIAA1324,APC,TNF,MMP1,CTNNB1,SDC1
GO: Biological Process	GO:1903034	regulation of response to wounding	5.59e-06	0.0217	3.58e-05	0.000316	9	MYC,BRAF,EGFR,SPP1,ESR1,CD44,TNF,PTEN,PTGS2
GO: Biological Process	GO:0007409	axonogenesis	5.88e-06	0.0229	3.75e-05	0.000331	9	KRAS,ERBB2,BRAF,SPP1,APC,BCL2,FGFR2,RUNX3,PTEN
GO: Biological Process	GO:0002694	regulation of leukocyte activation	1.04e-05	0.0405	6.31e-05	0.000558	9	TGFB1,CDKN2A,ERBB2,IGF2,CD44,AKT1,BCL2,CTNNB1,MMP14
GO: Biological Process	GO:0050865	regulation of cell activation	1.9e-05	0.0738	0.000109	0.000963	9	TGFB1,CDKN2A,ERBB2,IGF2,CD44,AKT1,BCL2,CTNNB1,MMP14
GO: Biological Process	GO:0000280	nuclear division	3.71e-05	0.144	0.000194	0.00171	9	TGFB1,MET,PTTG1,IGF2,ESR1,APC,TNF,MSH2,FGFR2
GO: Biological Process	GO:0048285	organelle fission	5.91e-05	0.229	0.000296	0.00261	9	TGFB1,MET,PTTG1,IGF2,ESR1,APC,TNF,MSH2,FGFR2
GO: Biological Process	GO:0043009	chordate embryonic development	0.000111	0.433	0.000513	0.00453	9	BRCA1,CYR61,EGFR,AKT1,MSH2,FGFR2,CTNNB1,MMP14,CDH1
GO: Biological Process	GO:0007276	gamete generation	0.000113	0.438	0.000518	0.00458	9	TGFB1,PTTG1,WT1,AKT1,BCL2,MSH2,CTNNB1,PTGS2,PGR
GO: Biological Process	GO:0009792	embryo development ending in birth or egg hatching	0.000123	0.477	0.000554	0.0049	9	BRCA1,CYR61,EGFR,AKT1,MSH2,FGFR2,CTNNB1,MMP14,CDH1
GO: Biological Process	GO:0006954	inflammatory response	0.000138	0.537	0.00061	0.00539	9	TGFB1,EGFR,SPP1,ESR1,CD44,AKT1,TNF,SDC1,PTGS2
GO: Biological Process	GO:0006325	chromatin organization	0.000251	0.975	0.00102	0.00902	9	TGFB1,MYC,CDKN2A,BRCA1,ESR1,CTNNB1,EZH2,TERT,DNMT1
GO: Biological Process	GO:0016567	protein ubiquitination	0.000279	1	0.00111	0.00982	9	CDKN2A,PTTG1,BRCA1,RASSF1,AKT1,BCL2,PTEN,MDM2,SKP2
GO: Biological Process	GO:0051223	regulation of protein transport	0.000381	1	0.00147	0.013	9	TGFB1,CDKN2A,ERBB2,BRCA1,EGFR,TNF,MDM2,CDH1,PTGS2
GO: Biological Process	GO:0031347	regulation of defense response	0.000399	1	0.00152	0.0135	9	TGFB1,KRAS,IGF2,EGFR,ESR1,CD44,TNF,MMP2,PTGS2
GO: Biological Process	GO:0050776	regulation of immune response	0.000775	1	0.00268	0.0237	9	TGFB1,KRAS,IGF2,ESR1,CD44,BCL2,TNF,MMP2,PTEN
GO: Biological Process	GO:0044265	cellular macromolecule catabolic process	0.00139	1	0.0044	0.0389	9	CDKN2A,PTTG1,IGFBP3,APC,AKT1,CTNNB1,PTEN,MDM2,SKP2
GO: Biological Process	GO:0043603	cellular amide metabolic process	0.00191	1	0.00581	0.0514	9	TGFB1,ERBB2,CYR61,EGFR,ESR1,WT1,AKT1,TNF,PTGS2
GO: Biological Process	GO:0032940	secretion by cell	0.00294	1	0.00823	0.0728	9	TGFB1,SPARC,IGF2,BRAF,EGFR,TIMP1,TIMP3,TNF,SDC1
GO: Biological Process	GO:0048878	chemical homeostasis	0.00387	1	0.0103	0.0915	9	TGFB1,MYC,CDKN2A,MET,EGFR,ESR1,AKT1,BCL2,CDH1
GO: Biological Process	GO:1901135	carbohydrate derivative metabolic process	0.00954	1	0.021	0.186	9	TGFB1,MYC,CD44,AKT1,BCL2,MSH2,CTNNB1,SDC1,DNMT1
GO: Cellular Component	GO:0005578	proteinaceous extracellular matrix	7.64e-07	0.000228	7.59e-05	0.000476	9	TGFB1,SPARC,CYR61,TIMP1,TIMP3,MMP1,MMP2,MMP9,MMP12
GO: Cellular Component	GO:0005912	adherens junction	5.68e-06	0.00169	0.000241	0.00151	9	KRAS,NDRG1,EGFR,CD44,APC,CTNNB1,MMP14,CDH1,SDC1
GO: Cellular Component	GO:0070161	anchoring junction	7.75e-06	0.00231	0.000257	0.00161	9	KRAS,NDRG1,EGFR,CD44,APC,CTNNB1,MMP14,CDH1,SDC1
GO: Cellular Component	GO:0000228	nuclear chromosome	2.07e-05	0.00616	0.000408	0.00256	9	MYC,IGFBP3,BRCA1,ESR1,MSH2,CTNNB1,RUNX3,EZH2,TERT
GO: Cellular Component	GO:0036477	somatodendritic compartment	0.000505	0.151	0.00386	0.0242	9	TGFB1,MET,ESR1,ESR2,APC,CTNNB1,PTEN,PGR,DNMT1
GO: Cellular Component	GO:0009986	cell surface	0.000531	0.158	0.00386	0.0242	9	TGFB1,MET,SPARC,EGFR,CD44,TNF,FGFR2,CDH1,SDC1
GO: Cellular Component	GO:0098590	plasma membrane region	0.00184	0.548	0.00981	0.0616	9	MET,ERBB2,EGFR,CD44,APC,CTNNB1,PTEN,CDH1,PTGS2
GO: Cellular Component	GO:0015630	microtubule cytoskeleton	0.00311	0.927	0.0138	0.0869	9	MYC,CCNE1,NDRG1,BRCA1,RASSF1,APC,AKT1,CTNNB1,CDK6
GO: Cellular Component	GO:0005773	vacuole	0.00539	1	0.0194	0.122	9	CDKN1B,ERBB2,NDRG1,EGFR,KIAA1324,TNF,MMP14,CDH1,SDC1
GO: Molecular Function	GO:0019903	protein phosphatase binding	5.23e-09	1.99e-06	3.32e-07	2.17e-06	8	CDKN1B,MET,ERBB2,EGFR,AKT1,BCL2,CTNNB1,CDH1
GO: Molecular Function	GO:0019902	phosphatase binding	4.52e-08	1.72e-05	2.46e-06	1.6e-05	8	CDKN1B,MET,ERBB2,EGFR,AKT1,BCL2,CTNNB1,CDH1
GO: Molecular Function	GO:0046982	protein heterodimerization activity	0.000168	0.064	0.00169	0.011	8	TGFB1,MYC,MET,ERBB2,BRAF,EGFR,BCL2,CTNNB1
GO: Molecular Function	GO:0016301	kinase activity	0.00233	0.887	0.0108	0.0705	8	CCNE1,MET,ERBB2,BRAF,EGFR,AKT1,FGFR2,CDK6
GO: Biological Process	GO:0048661	positive regulation of smooth muscle cell proliferation	7.08e-11	2.75e-07	1.63e-09	1.44e-08	8	MYC,EGFR,TNF,FGFR2,MDM2,SKP2,TERT,PTGS2
GO: Biological Process	GO:0014812	muscle cell migration	1.25e-10	4.86e-07	2.77e-09	2.45e-08	8	MYC,MET,IGFBP3,BCL2,MMP1,MDM2,TERT,PGR
GO: Biological Process	GO:0001657	ureteric bud development	4.78e-10	1.86e-06	8.99e-09	7.95e-08	8	TGFB1,MYC,CD44,WT1,BCL2,FGFR2,CTNNB1,SDC1
GO: Biological Process	GO:0072163	mesonephric epithelium development	5.15e-10	2e-06	9.53e-09	8.43e-08	8	TGFB1,MYC,CD44,WT1,BCL2,FGFR2,CTNNB1,SDC1
GO: Biological Process	GO:0072164	mesonephric tubule development	5.15e-10	2e-06	9.53e-09	8.43e-08	8	TGFB1,MYC,CD44,WT1,BCL2,FGFR2,CTNNB1,SDC1
GO: Biological Process	GO:0033273	response to vitamin	6.45e-10	2.51e-06	1.17e-08	1.04e-07	8	TGFB1,CCNE1,SPARC,TIMP3,SPP1,MDM2,PTGS2,DNMT1
GO: Biological Process	GO:0001823	mesonephros development	6.94e-10	2.7e-06	1.25e-08	1.1e-07	8	TGFB1,MYC,CD44,WT1,BCL2,FGFR2,CTNNB1,SDC1
GO: Biological Process	GO:0008585	female gonad development	2.06e-09	7.99e-06	3.19e-08	2.82e-07	8	CCNE1,ESR1,ESR2,WT1,BCL2,MMP2,MMP14,PGR
GO: Biological Process	GO:0046545	development of primary female sexual characteristics	2.8e-09	1.09e-05	4.17e-08	3.69e-07	8	CCNE1,ESR1,ESR2,WT1,BCL2,MMP2,MMP14,PGR
GO: Biological Process	GO:0097306	cellular response to alcohol	5.02e-09	1.95e-05	7.08e-08	6.26e-07	8	TGFB1,BRCA1,EGFR,ESR1,ESR2,MMP2,CTNNB1,CDH1
GO: Biological Process	GO:2000045	regulation of G1/S transition of mitotic cell cycle	6.62e-09	2.57e-05	9.08e-08	8.03e-07	8	CDKN1B,EGFR,AKT1,BCL2,PTEN,MDM2,EZH2,TERT
GO: Biological Process	GO:0046660	female sex differentiation	6.62e-09	2.57e-05	9.08e-08	8.03e-07	8	CCNE1,ESR1,ESR2,WT1,BCL2,MMP2,MMP14,PGR
GO: Biological Process	GO:0072073	kidney epithelium development	7.37e-09	2.86e-05	1e-07	8.88e-07	8	TGFB1,MYC,CD44,WT1,BCL2,FGFR2,CTNNB1,SDC1
GO: Biological Process	GO:2000241	regulation of reproductive process	7.37e-09	2.86e-05	1e-07	8.88e-07	8	CDKN1B,TIMP1,ESR1,WT1,APC,MSH2,FGFR2,CTNNB1
GO: Biological Process	GO:0007088	regulation of mitotic nuclear division	7.77e-09	3.02e-05	1.06e-07	9.33e-07	8	TGFB1,MET,PTTG1,IGF2,ESR1,APC,TNF,FGFR2
GO: Biological Process	GO:0038127	ERBB signaling pathway	8.63e-09	3.35e-05	1.16e-07	1.03e-06	8	TGFB1,KRAS,ERBB2,EGFR,ESR1,ESR2,AKT1,MMP9
GO: Biological Process	GO:1902806	regulation of cell cycle G1/S phase transition	1.12e-08	4.33e-05	1.48e-07	1.31e-06	8	CDKN1B,EGFR,AKT1,BCL2,PTEN,MDM2,EZH2,TERT
GO: Biological Process	GO:0055123	digestive system development	1.73e-08	6.72e-05	2.18e-07	1.92e-06	8	TGFB1,IGF2,EGFR,BCL2,TNF,FGFR2,CTNNB1,CDH1
GO: Biological Process	GO:0046661	male sex differentiation	2.09e-08	8.11e-05	2.59e-07	2.29e-06	8	ESR1,ESR2,WT1,BCL2,MSH2,CTNNB1,MMP14,SDC1
GO: Biological Process	GO:0014074	response to purine-containing compound	2.29e-08	8.89e-05	2.81e-07	2.48e-06	8	CCNE1,SPARC,BRAF,WT1,PTEN,SDC1,PTGS2,DNMT1
GO: Biological Process	GO:2001236	regulation of extrinsic apoptotic signaling pathway	2.51e-08	9.73e-05	3.02e-07	2.67e-06	8	BRCA1,TIMP3,AKT1,BCL2,TNF,RUNX3,PTEN,TERT
GO: Biological Process	GO:0010810	regulation of cell-substrate adhesion	4.05e-08	0.000157	4.72e-07	4.18e-06	8	CDKN2A,BRAF,CYR61,SPP1,BCL2,PTEN,MMP14,CDK6
GO: Biological Process	GO:0070374	positive regulation of ERK1 and ERK2 cascade	5.19e-08	0.000202	5.83e-07	5.16e-06	8	BRAF,EGFR,ESR1,ESR2,CD44,TNF,FGFR2,PTEN
GO: Biological Process	GO:0051054	positive regulation of DNA metabolic process	8.66e-08	0.000337	9.21e-07	8.15e-06	8	TGFB1,MYC,MET,IGFBP3,BRCA1,EGFR,AKT1,CTNNB1
GO: Biological Process	GO:0030278	regulation of ossification	9.7e-08	0.000377	1.02e-06	9.03e-06	8	TGFB1,CYR61,APC,BCL2,TNF,FGFR2,CTNNB1,CDK6
GO: Biological Process	GO:2001234	negative regulation of apoptotic signaling pathway	2.11e-07	0.000821	2.04e-06	1.8e-05	8	BRCA1,CD44,AKT1,BCL2,TNF,CTNNB1,MMP9,TERT
GO: Biological Process	GO:0045216	cell-cell junction organization	2.26e-07	0.000878	2.17e-06	1.92e-05	8	TGFB1,APC,BCL2,TNF,CTNNB1,PTEN,MMP14,CDH1
GO: Biological Process	GO:0000075	cell cycle checkpoint	2.58e-07	0.001	2.42e-06	2.14e-05	8	TGFB1,CDKN1B,NDRG1,BRCA1,APC,AKT1,MSH2,MDM2
GO: Biological Process	GO:0046822	regulation of nucleocytoplasmic transport	2.75e-07	0.00107	2.54e-06	2.24e-05	8	TGFB1,CDKN2A,BRCA1,EGFR,TNF,MDM2,CDH1,PTGS2
GO: Biological Process	GO:0010951	negative regulation of endopeptidase activity	3.66e-07	0.00142	3.3e-06	2.91e-05	8	PTTG1,SERPINB5,TIMP1,TIMP3,CD44,AKT1,MMP9,MDM2
GO: Biological Process	GO:0007162	negative regulation of cell adhesion	4.26e-07	0.00166	3.79e-06	3.35e-05	8	TGFB1,CDKN2A,ERBB2,CD44,MMP2,PTEN,MMP14,CDH1
GO: Biological Process	GO:0000302	response to reactive oxygen species	4.53e-07	0.00176	4.01e-06	3.54e-05	8	CDKN2A,MET,BCL2,TNF,MMP2,MDM2,EZH2,SDC1
GO: Biological Process	GO:0060541	respiratory system development	4.81e-07	0.00187	4.24e-06	3.75e-05	8	KRAS,SPARC,WT1,TNF,FGFR2,CTNNB1,MMP14,PGR
GO: Biological Process	GO:0010466	negative regulation of peptidase activity	5.25e-07	0.00204	4.59e-06	4.06e-05	8	PTTG1,SERPINB5,TIMP1,TIMP3,CD44,AKT1,MMP9,MDM2
GO: Biological Process	GO:0034330	cell junction organization	5.41e-07	0.0021	4.7e-06	4.16e-05	8	TGFB1,APC,BCL2,TNF,CTNNB1,PTEN,MMP14,CDH1
GO: Biological Process	GO:0072331	signal transduction by p53 class mediator	6.26e-07	0.00243	5.32e-06	4.7e-05	8	CDKN1B,CDKN2A,NDRG1,BRCA1,CD44,AKT1,MSH2,MDM2
GO: Biological Process	GO:1901342	regulation of vasculature development	6.44e-07	0.0025	5.42e-06	4.8e-05	8	ERBB2,SPARC,BRCA1,WT1,CTNNB1,MMP9,TERT,PTGS2
GO: Biological Process	GO:0060485	mesenchyme development	6.44e-07	0.0025	5.42e-06	4.8e-05	8	TGFB1,MYC,WT1,BCL2,FGFR2,CTNNB1,MDM2,EZH2
GO: Biological Process	GO:0090316	positive regulation of intracellular protein transport	7.63e-07	0.00296	6.34e-06	5.61e-05	8	TGFB1,ERBB2,BRCA1,EGFR,TNF,MDM2,CDH1,PTGS2
GO: Biological Process	GO:0045927	positive regulation of growth	8.52e-07	0.00331	6.98e-06	6.17e-05	8	ERBB2,IGF2,EGFR,WT1,AKT1,BCL2,FGFR2,MMP14
GO: Biological Process	GO:0030522	intracellular receptor signaling pathway	1.64e-06	0.00637	1.24e-05	0.00011	8	CCNE1,BRCA1,ESR1,ESR2,CTNNB1,EZH2,SKP2,PGR
GO: Biological Process	GO:0033044	regulation of chromosome organization	1.72e-06	0.00669	1.29e-05	0.000114	8	TGFB1,MYC,PTTG1,BRCA1,APC,CTNNB1,TERT,DNMT1
GO: Biological Process	GO:0097193	intrinsic apoptotic signaling pathway	1.72e-06	0.00669	1.29e-05	0.000114	8	MYC,BRCA1,CD44,AKT1,BCL2,TNF,MSH2,MMP9
GO: Biological Process	GO:0006606	protein import into nucleus	1.77e-06	0.00686	1.32e-05	0.000117	8	TGFB1,BRCA1,EGFR,AKT1,TNF,CTNNB1,CDH1,PTGS2
GO: Biological Process	GO:1903533	regulation of protein targeting	2.59e-06	0.0101	1.86e-05	0.000165	8	TGFB1,CDKN2A,ERBB2,BRCA1,EGFR,TNF,CDH1,PTGS2
GO: Biological Process	GO:0051170	nuclear import	2.78e-06	0.0108	1.97e-05	0.000174	8	TGFB1,BRCA1,EGFR,AKT1,TNF,CTNNB1,CDH1,PTGS2
GO: Biological Process	GO:0019216	regulation of lipid metabolic process	3.19e-06	0.0124	2.22e-05	0.000196	8	TGFB1,IGF2,BRCA1,CYR61,ESR1,AKT1,TNF,PTGS2
GO: Biological Process	GO:0010639	negative regulation of organelle organization	3.98e-06	0.0155	2.67e-05	0.000236	8	PTTG1,BRCA1,ESR1,APC,AKT1,MSH2,FGFR2,DNMT1
GO: Biological Process	GO:1903037	regulation of leukocyte cell-cell adhesion	4.34e-06	0.0169	2.86e-05	0.000253	8	TGFB1,CDKN2A,ERBB2,IGF2,CD44,AKT1,TNF,CTNNB1
GO: Biological Process	GO:0017038	protein import	5.37e-06	0.0209	3.45e-05	0.000305	8	TGFB1,BRCA1,EGFR,AKT1,TNF,CTNNB1,CDH1,PTGS2
GO: Biological Process	GO:0043405	regulation of MAP kinase activity	5.96e-06	0.0231	3.79e-05	0.000335	8	TGFB1,KRAS,MET,ERBB2,BRAF,EGFR,TNF,EZH2
GO: Biological Process	GO:0050804	modulation of chemical synaptic transmission	6.08e-06	0.0236	3.85e-05	0.000341	8	KRAS,MET,BRAF,EGFR,TNF,MMP9,PTEN,PTGS2
GO: Biological Process	GO:0048871	multicellular organismal homeostasis	9.23e-06	0.0359	5.64e-05	0.000498	8	KRAS,EGFR,SPP1,BCL2,TNF,CTNNB1,CDH1,PTGS2
GO: Biological Process	GO:0034248	regulation of cellular amide metabolic process	9.59e-06	0.0373	5.85e-05	0.000517	8	TGFB1,ERBB2,CYR61,EGFR,ESR1,WT1,AKT1,TNF
GO: Biological Process	GO:0014706	striated muscle tissue development	1.32e-05	0.0512	7.87e-05	0.000696	8	TGFB1,MYC,MET,WT1,BCL2,FGFR2,CTNNB1,PTEN
GO: Biological Process	GO:0060249	anatomical structure homeostasis	1.44e-05	0.056	8.5e-05	0.000751	8	MYC,KRAS,EGFR,SPP1,APC,BCL2,CTNNB1,TERT
GO: Biological Process	GO:0007517	muscle organ development	1.52e-05	0.0591	8.91e-05	0.000788	8	TGFB1,MYC,MET,WT1,BCL2,FGFR2,CTNNB1,PTEN
GO: Biological Process	GO:0060537	muscle tissue development	1.81e-05	0.0704	0.000104	0.000922	8	TGFB1,MYC,MET,WT1,BCL2,FGFR2,CTNNB1,PTEN
GO: Biological Process	GO:0043434	response to peptide hormone	2.85e-05	0.111	0.000155	0.00137	8	CDKN1B,SPARC,IGF2,BRAF,TIMP1,AKT1,CTNNB1,MDM2
GO: Biological Process	GO:0010608	posttranscriptional regulation of gene expression	4.74e-05	0.184	0.000243	0.00215	8	TGFB1,ERBB2,EGFR,ESR1,WT1,AKT1,TNF,TERT
GO: Biological Process	GO:1901652	response to peptide	4.89e-05	0.19	0.000249	0.0022	8	CDKN1B,SPARC,IGF2,BRAF,TIMP1,AKT1,CTNNB1,MDM2
GO: Biological Process	GO:0048568	embryonic organ development	5.03e-05	0.196	0.000256	0.00226	8	MYC,CYR61,EGFR,AKT1,TNF,FGFR2,CTNNB1,MMP14
GO: Biological Process	GO:0051222	positive regulation of protein transport	7.49e-05	0.291	0.000367	0.00324	8	TGFB1,ERBB2,BRCA1,EGFR,TNF,MDM2,CDH1,PTGS2
GO: Biological Process	GO:0072657	protein localization to membrane	8.36e-05	0.325	0.000401	0.00354	8	TGFB1,ERBB2,BRAF,EGFR,AKT1,BCL2,TNF,CDH1
GO: Biological Process	GO:0008015	blood circulation	0.000144	0.558	0.000633	0.0056	8	TGFB1,MET,EGFR,ESR2,AKT1,MMP2,MDM2,PTGS2
GO: Biological Process	GO:0003013	circulatory system process	0.000149	0.579	0.000655	0.00579	8	TGFB1,MET,EGFR,ESR2,AKT1,MMP2,MDM2,PTGS2
GO: Biological Process	GO:0010720	positive regulation of cell development	0.000172	0.67	0.000737	0.00652	8	TGFB1,MYC,CDKN2A,MET,BRAF,BCL2,CTNNB1,EZH2
GO: Biological Process	GO:0044057	regulation of system process	0.000203	0.79	0.00085	0.00752	8	EGFR,ESR2,AKT1,TNF,MMP2,PTEN,MDM2,PTGS2
GO: Biological Process	GO:0006511	ubiquitin-dependent protein catabolic process	0.000213	0.827	0.000882	0.0078	8	CDKN2A,PTTG1,APC,AKT1,CTNNB1,PTEN,MDM2,SKP2
GO: Biological Process	GO:0019941	modification-dependent protein catabolic process	0.000233	0.906	0.000961	0.0085	8	CDKN2A,PTTG1,APC,AKT1,CTNNB1,PTEN,MDM2,SKP2
GO: Biological Process	GO:0043632	modification-dependent macromolecule catabolic process	0.000255	0.992	0.00104	0.00916	8	CDKN2A,PTTG1,APC,AKT1,CTNNB1,PTEN,MDM2,SKP2
GO: Biological Process	GO:0022604	regulation of cell morphogenesis	0.000264	1	0.00107	0.00944	8	TGFB1,MET,SPARC,BRAF,SPP1,CTNNB1,PTEN,EZH2
GO: Biological Process	GO:0045664	regulation of neuron differentiation	0.00043	1	0.00162	0.0143	8	MET,BRAF,SPP1,AKT1,BCL2,PTEN,MDM2,EZH2
GO: Biological Process	GO:0031344	regulation of cell projection organization	0.000439	1	0.00165	0.0146	8	MET,BRAF,SPP1,APC,AKT1,PTEN,MDM2,EZH2
GO: Biological Process	GO:0051603	proteolysis involved in cellular protein catabolic process	0.000461	1	0.00171	0.0151	8	CDKN2A,PTTG1,APC,AKT1,CTNNB1,PTEN,MDM2,SKP2
GO: Biological Process	GO:0008610	lipid biosynthetic process	0.000485	1	0.00179	0.0159	8	IGF2,BRCA1,CYR61,AKT1,TNF,FGFR2,PTEN,PTGS2
GO: Biological Process	GO:0050778	positive regulation of immune response	0.000505	1	0.00185	0.0163	8	TGFB1,KRAS,ESR1,CD44,BCL2,TNF,MMP2,PTEN
GO: Biological Process	GO:0044257	cellular protein catabolic process	0.00063	1	0.00226	0.02	8	CDKN2A,PTTG1,APC,AKT1,CTNNB1,PTEN,MDM2,SKP2
GO: Biological Process	GO:0043604	amide biosynthetic process	0.00134	1	0.00427	0.0377	8	TGFB1,ERBB2,CYR61,EGFR,ESR1,WT1,AKT1,TNF
GO: Biological Process	GO:0051707	response to other organism	0.00568	1	0.0139	0.123	8	TGFB1,SPARC,AKT1,BCL2,TNF,PTGS2,DNMT1,CDK6
GO: Biological Process	GO:0043207	response to external biotic stimulus	0.00568	1	0.0139	0.123	8	TGFB1,SPARC,AKT1,BCL2,TNF,PTGS2,DNMT1,CDK6
GO: Biological Process	GO:0009607	response to biotic stimulus	0.00722	1	0.017	0.151	8	TGFB1,SPARC,AKT1,BCL2,TNF,PTGS2,DNMT1,CDK6
GO: Cellular Component	GO:0000785	chromatin	4.81e-05	0.0143	0.000703	0.00441	8	MYC,CDKN2A,IGFBP3,ESR1,CTNNB1,RUNX3,EZH2,DNMT1
GO: Cellular Component	GO:0044454	nuclear chromosome part	8.8e-05	0.0262	0.00108	0.00676	8	MYC,IGFBP3,ESR1,MSH2,CTNNB1,RUNX3,EZH2,TERT
GO: Cellular Component	GO:0005815	microtubule organizing center	0.000336	0.1	0.00294	0.0185	8	CCNE1,NDRG1,BRCA1,RASSF1,APC,AKT1,CTNNB1,CDK6
GO: Cellular Component	GO:0044297	cell body	0.000526	0.157	0.00386	0.0242	8	TGFB1,MET,BRAF,ESR1,ESR2,APC,PGR,DNMT1
GO: Cellular Component	GO:0005768	endosome	0.00167	0.497	0.00937	0.0588	8	CDKN1B,ERBB2,NDRG1,EGFR,KIAA1324,TNF,MMP14,CDH1
GO: Molecular Function	GO:0050839	cell adhesion molecule binding	1.69e-06	0.000644	6.44e-05	0.00042	7	NDRG1,CYR61,EGFR,APC,CTNNB1,MMP14,CDH1
GO: Molecular Function	GO:0004672	protein kinase activity	0.00205	0.78	0.00974	0.0635	7	MET,ERBB2,BRAF,EGFR,AKT1,FGFR2,CDK6
GO: Molecular Function	GO:0019904	protein domain specific binding	0.00391	1	0.0154	0.1	7	KRAS,PTTG1,WT1,BCL2,PTEN,CDH1,DNMT1
GO: Molecular Function	GO:1990837	sequence-specific double-stranded DNA binding	0.00409	1	0.0159	0.104	7	MYC,ESR1,ESR2,MSH2,RUNX3,EZH2,PGR
GO: Molecular Function	GO:0016773	phosphotransferase activity, alcohol group as acceptor	0.00568	1	0.0188	0.123	7	MET,ERBB2,BRAF,EGFR,AKT1,FGFR2,CDK6
GO: Biological Process	GO:0060688	regulation of morphogenesis of a branching structure	2.66e-10	1.03e-06	5.49e-09	4.85e-08	7	TGFB1,MET,ESR1,TNF,FGFR2,CTNNB1,CDH1
GO: Biological Process	GO:0035272	exocrine system development	3e-10	1.17e-06	6.01e-09	5.31e-08	7	TGFB1,MET,IGF2,EGFR,TNF,FGFR2,CDH1
GO: Biological Process	GO:0014910	regulation of smooth muscle cell migration	1.01e-09	3.92e-06	1.72e-08	1.52e-07	7	MYC,IGFBP3,BCL2,MMP1,MDM2,TERT,PGR
GO: Biological Process	GO:0014909	smooth muscle cell migration	1.8e-09	7e-06	2.88e-08	2.55e-07	7	MYC,IGFBP3,BCL2,MMP1,MDM2,TERT,PGR
GO: Biological Process	GO:0021782	glial cell development	5.03e-09	1.96e-05	7.08e-08	6.26e-07	7	TGFB1,KRAS,NDRG1,EGFR,AKT1,PTEN,CDK6
GO: Biological Process	GO:0033138	positive regulation of peptidyl-serine phosphorylation	7.97e-09	3.1e-05	1.08e-07	9.54e-07	7	TGFB1,MET,BRAF,CD44,AKT1,BCL2,TNF
GO: Biological Process	GO:0048145	regulation of fibroblast proliferation	1.23e-08	4.76e-05	1.61e-07	1.43e-06	7	TGFB1,MYC,EGFR,ESR1,CTNNB1,MMP9,CDK6
GO: Biological Process	GO:0048144	fibroblast proliferation	1.5e-08	5.84e-05	1.95e-07	1.73e-06	7	TGFB1,MYC,EGFR,ESR1,CTNNB1,MMP9,CDK6
GO: Biological Process	GO:0022602	ovulation cycle process	2.22e-08	8.64e-05	2.74e-07	2.42e-06	7	CCNE1,ESR1,ESR2,BCL2,MMP2,MMP14,PGR
GO: Biological Process	GO:0042552	myelination	4.31e-08	0.000167	4.98e-07	4.41e-06	7	TGFB1,ERBB2,NDRG1,AKT1,TNF,CTNNB1,PTEN
GO: Biological Process	GO:0008366	axon ensheathment	4.83e-08	0.000188	5.5e-07	4.86e-06	7	TGFB1,ERBB2,NDRG1,AKT1,TNF,CTNNB1,PTEN
GO: Biological Process	GO:0007272	ensheathment of neurons	4.83e-08	0.000188	5.5e-07	4.86e-06	7	TGFB1,ERBB2,NDRG1,AKT1,TNF,CTNNB1,PTEN
GO: Biological Process	GO:0033135	regulation of peptidyl-serine phosphorylation	6.02e-08	0.000234	6.66e-07	5.89e-06	7	TGFB1,MET,BRAF,CD44,AKT1,BCL2,TNF
GO: Biological Process	GO:0046824	positive regulation of nucleocytoplasmic transport	6.36e-08	0.000247	6.92e-07	6.12e-06	7	TGFB1,BRCA1,EGFR,TNF,MDM2,CDH1,PTGS2
GO: Biological Process	GO:0043200	response to amino acid	6.71e-08	0.000261	7.26e-07	6.42e-06	7	CDKN1B,EGFR,TIMP3,TNF,MMP2,CDH1,DNMT1
GO: Biological Process	GO:0007173	epidermal growth factor receptor signaling pathway	7.86e-08	0.000305	8.43e-07	7.46e-06	7	TGFB1,KRAS,EGFR,ESR1,ESR2,AKT1,MMP9
GO: Biological Process	GO:0030518	intracellular steroid hormone receptor signaling pathway	9.65e-08	0.000375	1.02e-06	9.01e-06	7	CCNE1,BRCA1,ESR1,ESR2,CTNNB1,SKP2,PGR
GO: Biological Process	GO:0009411	response to UV	1.18e-07	0.000457	1.22e-06	1.08e-05	7	MYC,EGFR,AKT1,BCL2,MSH2,MDM2,PTGS2
GO: Biological Process	GO:0071456	cellular response to hypoxia	1.36e-07	0.000529	1.38e-06	1.22e-05	7	NDRG1,AKT1,BCL2,PTEN,MDM2,TERT,PTGS2
GO: Biological Process	GO:0008584	male gonad development	1.36e-07	0.000529	1.38e-06	1.22e-05	7	ESR1,ESR2,WT1,BCL2,MSH2,MMP14,SDC1
GO: Biological Process	GO:0046546	development of primary male sexual characteristics	1.36e-07	0.000529	1.38e-06	1.22e-05	7	ESR1,ESR2,WT1,BCL2,MSH2,MMP14,SDC1
GO: Biological Process	GO:0042542	response to hydrogen peroxide	1.57e-07	0.00061	1.56e-06	1.38e-05	7	CDKN2A,MET,BCL2,MMP2,MDM2,EZH2,SDC1
GO: Biological Process	GO:0036294	cellular response to decreased oxygen levels	1.89e-07	0.000733	1.84e-06	1.63e-05	7	NDRG1,AKT1,BCL2,PTEN,MDM2,TERT,PTGS2
GO: Biological Process	GO:0048565	digestive tract development	1.89e-07	0.000733	1.84e-06	1.63e-05	7	TGFB1,EGFR,BCL2,TNF,FGFR2,CTNNB1,CDH1
GO: Biological Process	GO:0043279	response to alkaloid	2.58e-07	0.001	2.42e-06	2.14e-05	7	MYC,IGF2,BCL2,TNF,MDM2,PGR,DNMT1
GO: Biological Process	GO:0071453	cellular response to oxygen levels	2.69e-07	0.00105	2.49e-06	2.2e-05	7	NDRG1,AKT1,BCL2,PTEN,MDM2,TERT,PTGS2
GO: Biological Process	GO:0008645	hexose transmembrane transport	4.08e-07	0.00159	3.64e-06	3.22e-05	7	MYC,MET,BRAF,ESR1,AKT1,TNF,TERT
GO: Biological Process	GO:0015749	monosaccharide transmembrane transport	4.42e-07	0.00172	3.92e-06	3.47e-05	7	MYC,MET,BRAF,ESR1,AKT1,TNF,TERT
GO: Biological Process	GO:0031330	negative regulation of cellular catabolic process	8.4e-07	0.00326	6.92e-06	6.12e-05	7	CDKN2A,MET,TIMP1,TIMP3,APC,AKT1,BCL2
GO: Biological Process	GO:0043401	steroid hormone mediated signaling pathway	9.02e-07	0.00351	7.35e-06	6.5e-05	7	CCNE1,BRCA1,ESR1,ESR2,CTNNB1,SKP2,PGR
GO: Biological Process	GO:0030308	negative regulation of cell growth	9.35e-07	0.00363	7.54e-06	6.66e-05	7	TGFB1,CDKN1B,CDKN2A,SPP1,ESR2,WT1,BCL2
GO: Biological Process	GO:0034329	cell junction assembly	1.32e-06	0.00512	1.03e-05	9.09e-05	7	APC,BCL2,TNF,CTNNB1,PTEN,MMP14,CDH1
GO: Biological Process	GO:0007160	cell-matrix adhesion	1.61e-06	0.00624	1.22e-05	0.000108	7	CDKN2A,CD44,BCL2,CTNNB1,PTEN,MMP14,CDK6
GO: Biological Process	GO:0008643	carbohydrate transport	1.77e-06	0.00687	1.32e-05	0.000117	7	MYC,MET,BRAF,ESR1,AKT1,TNF,TERT
GO: Biological Process	GO:0030324	lung development	2.56e-06	0.00995	1.84e-05	0.000163	7	KRAS,SPARC,TNF,FGFR2,CTNNB1,MMP14,PGR
GO: Biological Process	GO:0050670	regulation of lymphocyte proliferation	2.56e-06	0.00995	1.84e-05	0.000163	7	TGFB1,CDKN2A,ERBB2,IGF2,CD44,BCL2,CTNNB1
GO: Biological Process	GO:0032944	regulation of mononuclear cell proliferation	2.72e-06	0.0106	1.93e-05	0.000171	7	TGFB1,CDKN2A,ERBB2,IGF2,CD44,BCL2,CTNNB1
GO: Biological Process	GO:0030323	respiratory tube development	2.89e-06	0.0112	2.04e-05	0.00018	7	KRAS,SPARC,TNF,FGFR2,CTNNB1,MMP14,PGR
GO: Biological Process	GO:0009755	hormone-mediated signaling pathway	3.24e-06	0.0126	2.25e-05	0.000199	7	CCNE1,BRCA1,ESR1,ESR2,CTNNB1,SKP2,PGR
GO: Biological Process	GO:0043406	positive regulation of MAP kinase activity	3.53e-06	0.0137	2.4e-05	0.000213	7	TGFB1,KRAS,MET,ERBB2,EGFR,TNF,EZH2
GO: Biological Process	GO:0070663	regulation of leukocyte proliferation	3.63e-06	0.0141	2.47e-05	0.000218	7	TGFB1,CDKN2A,ERBB2,IGF2,CD44,BCL2,CTNNB1
GO: Biological Process	GO:0010631	epithelial cell migration	3.85e-06	0.0149	2.6e-05	0.00023	7	TGFB1,MET,SPARC,AKT1,MMP9,PTEN,PTGS2
GO: Biological Process	GO:0031647	regulation of protein stability	4.07e-06	0.0158	2.71e-05	0.00024	7	CDKN2A,KRAS,RASSF1,BCL2,PTEN,MDM2,TERT
GO: Biological Process	GO:0090132	epithelium migration	4.18e-06	0.0162	2.78e-05	0.000246	7	TGFB1,MET,SPARC,AKT1,MMP9,PTEN,PTGS2
GO: Biological Process	GO:0045765	regulation of angiogenesis	4.3e-06	0.0167	2.84e-05	0.000252	7	ERBB2,SPARC,BRCA1,CTNNB1,MMP9,TERT,PTGS2
GO: Biological Process	GO:0043583	ear development	4.3e-06	0.0167	2.84e-05	0.000252	7	TGFB1,MYC,CDKN1B,SPARC,BCL2,FGFR2,CDH1
GO: Biological Process	GO:0032846	positive regulation of homeostatic process	4.54e-06	0.0176	2.98e-05	0.000264	7	TGFB1,EGFR,SPP1,CD44,TNF,CTNNB1,PTGS2
GO: Biological Process	GO:0090130	tissue migration	4.92e-06	0.0191	3.2e-05	0.000283	7	TGFB1,MET,SPARC,AKT1,MMP9,PTEN,PTGS2
GO: Biological Process	GO:0034599	cellular response to oxidative stress	5.34e-06	0.0207	3.44e-05	0.000304	7	CDKN2A,MET,AKT1,BCL2,TNF,MDM2,EZH2
GO: Biological Process	GO:0018105	peptidyl-serine phosphorylation	8.25e-06	0.032	5.13e-05	0.000454	7	TGFB1,MET,BRAF,CD44,AKT1,BCL2,TNF
GO: Biological Process	GO:0061448	connective tissue development	8.66e-06	0.0337	5.37e-05	0.000475	7	TGFB1,CYR61,TIMP1,CD44,WT1,CTNNB1,RUNX3
GO: Biological Process	GO:0051271	negative regulation of cellular component movement	9.1e-06	0.0353	5.58e-05	0.000494	7	TGFB1,CDKN1B,IGFBP3,BRAF,TIMP1,BCL2,PTEN
GO: Biological Process	GO:0007611	learning or memory	9.78e-06	0.038	5.95e-05	0.000527	7	KRAS,IGF2,BRAF,EGFR,ESR2,PTEN,PTGS2
GO: Biological Process	GO:0048872	homeostasis of number of cells	1.13e-05	0.0438	6.81e-05	0.000602	7	TGFB1,KRAS,CD44,AKT1,BCL2,EZH2,CDK6
GO: Biological Process	GO:0018209	peptidyl-serine modification	1.15e-05	0.0448	6.93e-05	0.000613	7	TGFB1,MET,BRAF,CD44,AKT1,BCL2,TNF
GO: Biological Process	GO:1903651	positive regulation of cytoplasmic transport	1.81e-05	0.0702	0.000104	0.000921	7	TGFB1,BRCA1,EGFR,TNF,MDM2,CDH1,PTGS2
GO: Biological Process	GO:0046651	lymphocyte proliferation	1.93e-05	0.0749	0.00011	0.000974	7	TGFB1,CDKN2A,ERBB2,IGF2,CD44,BCL2,CTNNB1
GO: Biological Process	GO:0050890	cognition	2.01e-05	0.0782	0.000115	0.00101	7	KRAS,IGF2,BRAF,EGFR,ESR2,PTEN,PTGS2
GO: Biological Process	GO:0032943	mononuclear cell proliferation	2.06e-05	0.0798	0.000117	0.00103	7	TGFB1,CDKN2A,ERBB2,IGF2,CD44,BCL2,CTNNB1
GO: Biological Process	GO:0071214	cellular response to abiotic stimulus	2.24e-05	0.0868	0.000126	0.00111	7	MYC,IGF2,ESR2,AKT1,CTNNB1,MDM2,PTGS2
GO: Biological Process	GO:0060070	canonical Wnt signaling pathway	2.24e-05	0.0868	0.000126	0.00111	7	MYC,APC,FGFR2,CTNNB1,PTEN,CDH1,SDC1
GO: Biological Process	GO:0051961	negative regulation of nervous system development	2.28e-05	0.0887	0.000127	0.00112	7	TGFB1,SPP1,TNF,CTNNB1,PTEN,MDM2,TERT
GO: Biological Process	GO:0070661	leukocyte proliferation	2.85e-05	0.111	0.000155	0.00137	7	TGFB1,CDKN2A,ERBB2,IGF2,CD44,BCL2,CTNNB1
GO: Biological Process	GO:0050863	regulation of T cell activation	3.28e-05	0.127	0.000174	0.00154	7	TGFB1,CDKN2A,ERBB2,IGF2,CD44,AKT1,CTNNB1
GO: Biological Process	GO:0032103	positive regulation of response to external stimulus	3.34e-05	0.13	0.000177	0.00157	7	TGFB1,MET,BRAF,EGFR,KIAA1324,TNF,PTGS2
GO: Biological Process	GO:0051098	regulation of binding	3.61e-05	0.14	0.00019	0.00168	7	TGFB1,MYC,CDKN2A,BCL2,CTNNB1,MMP9,TERT
GO: Biological Process	GO:0016485	protein processing	4.04e-05	0.157	0.00021	0.00186	7	MYC,CDKN1B,CDKN2A,TNF,MDM2,MMP14,CDH1
GO: Biological Process	GO:0006417	regulation of translation	4.78e-05	0.186	0.000244	0.00216	7	TGFB1,ERBB2,EGFR,ESR1,WT1,AKT1,TNF
GO: Biological Process	GO:0034110	regulation of homotypic cell-cell adhesion	4.86e-05	0.189	0.000248	0.00219	7	TGFB1,CDKN2A,ERBB2,IGF2,CD44,AKT1,CTNNB1
GO: Biological Process	GO:0031331	positive regulation of cellular catabolic process	5.23e-05	0.203	0.000265	0.00234	7	MYC,IGFBP3,KIAA1324,AKT1,TNF,PTEN,MDM2
GO: Biological Process	GO:0010721	negative regulation of cell development	5.42e-05	0.211	0.000274	0.00242	7	TGFB1,SPP1,BCL2,CTNNB1,PTEN,MDM2,TERT
GO: Biological Process	GO:0051604	protein maturation	6.68e-05	0.26	0.000329	0.00291	7	MYC,CDKN1B,CDKN2A,TNF,MDM2,MMP14,CDH1
GO: Biological Process	GO:0010769	regulation of cell morphogenesis involved in differentiation	7.65e-05	0.297	0.000372	0.00329	7	TGFB1,MET,BRAF,SPP1,CTNNB1,PTEN,EZH2
GO: Biological Process	GO:0090150	establishment of protein localization to membrane	8.05e-05	0.313	0.000387	0.00342	7	ERBB2,BRAF,EGFR,AKT1,BCL2,TNF,CDH1
GO: Biological Process	GO:0018108	peptidyl-tyrosine phosphorylation	9.17e-05	0.356	0.000434	0.00384	7	TGFB1,MET,ERBB2,IGF2,EGFR,CD44,FGFR2
GO: Biological Process	GO:0018212	peptidyl-tyrosine modification	9.48e-05	0.368	0.000447	0.00396	7	TGFB1,MET,ERBB2,IGF2,EGFR,CD44,FGFR2
GO: Biological Process	GO:0030099	myeloid cell differentiation	9.63e-05	0.374	0.000454	0.00401	7	TGFB1,MYC,APC,TNF,CTNNB1,MMP9,CDK6
GO: Biological Process	GO:0001654	eye development	0.000101	0.393	0.000473	0.00418	7	TGFB1,EGFR,WT1,APC,BCL2,FGFR2,CTNNB1
GO: Biological Process	GO:0034109	homotypic cell-cell adhesion	0.00012	0.466	0.000543	0.0048	7	TGFB1,CDKN2A,ERBB2,IGF2,CD44,AKT1,CTNNB1
GO: Biological Process	GO:0001701	in utero embryonic development	0.000151	0.585	0.00066	0.00584	7	CYR61,EGFR,AKT1,MSH2,FGFR2,CTNNB1,CDH1
GO: Biological Process	GO:0018205	peptidyl-lysine modification	0.000172	0.667	0.000735	0.00649	7	TGFB1,CDKN2A,BRCA1,CTNNB1,MDM2,EZH2,DNMT1
GO: Biological Process	GO:0031349	positive regulation of defense response	0.000174	0.677	0.00074	0.00655	7	TGFB1,KRAS,EGFR,ESR1,TNF,MMP2,PTGS2
GO: Biological Process	GO:0006887	exocytosis	0.000204	0.791	0.00085	0.00752	7	TGFB1,SPARC,IGF2,BRAF,TIMP1,TIMP3,SDC1
GO: Biological Process	GO:0010975	regulation of neuron projection development	0.000412	1	0.00156	0.0138	7	MET,BRAF,SPP1,AKT1,PTEN,MDM2,EZH2
GO: Biological Process	GO:0090066	regulation of anatomical structure size	0.000748	1	0.0026	0.023	7	EGFR,SPP1,ESR2,AKT1,MMP2,PTEN,PTGS2
GO: Biological Process	GO:0006935	chemotaxis	0.00103	1	0.00341	0.0302	7	TGFB1,KRAS,MET,ERBB2,CYR61,SPP1,RUNX3
GO: Biological Process	GO:0042330	taxis	0.00106	1	0.00348	0.0307	7	TGFB1,KRAS,MET,ERBB2,CYR61,SPP1,RUNX3
GO: Biological Process	GO:0048598	embryonic morphogenesis	0.00205	1	0.00616	0.0545	7	MYC,CYR61,FGFR2,MMP2,CTNNB1,MMP9,MMP14
GO: Biological Process	GO:0006412	translation	0.00241	1	0.00711	0.0629	7	TGFB1,ERBB2,EGFR,ESR1,WT1,AKT1,TNF
GO: Biological Process	GO:0043269	regulation of ion transport	0.00246	1	0.00721	0.0638	7	TGFB1,AKT1,BCL2,TNF,CTNNB1,MMP9,PTGS2
GO: Biological Process	GO:0043043	peptide biosynthetic process	0.00306	1	0.0085	0.0752	7	TGFB1,ERBB2,EGFR,ESR1,WT1,AKT1,TNF
GO: Biological Process	GO:0001816	cytokine production	0.00316	1	0.00871	0.077	7	TGFB1,MET,BRCA1,TNF,CTNNB1,RUNX3,PTGS2
GO: Biological Process	GO:0016032	viral process	0.00492	1	0.0128	0.113	7	TGFB1,MYC,BCL2,TNF,MMP1,MMP9,MDM2
GO: Biological Process	GO:0044764	multi-organism cellular process	0.00543	1	0.0137	0.121	7	TGFB1,MYC,BCL2,TNF,MMP1,MMP9,MDM2
GO: Biological Process	GO:0044419	interspecies interaction between organisms	0.00689	1	0.0164	0.145	7	TGFB1,MYC,BCL2,TNF,MMP1,MMP9,MDM2
GO: Biological Process	GO:0044403	symbiont process	0.00689	1	0.0164	0.145	7	TGFB1,MYC,BCL2,TNF,MMP1,MMP9,MDM2
GO: Biological Process	GO:0005975	carbohydrate metabolic process	0.00759	1	0.0178	0.157	7	TGFB1,MYC,IGF2,IGFBP3,AKT1,TNF,PTEN
GO: Biological Process	GO:0045087	innate immune response	0.00877	1	0.0195	0.172	7	TGFB1,KRAS,IGF2,ESR1,CD44,TNF,MMP2
GO: Biological Process	GO:0006518	peptide metabolic process	0.00882	1	0.0196	0.173	7	TGFB1,ERBB2,EGFR,ESR1,WT1,AKT1,TNF
GO: Cellular Component	GO:0045121	membrane raft	3.83e-05	0.0114	0.000601	0.00377	7	KRAS,ERBB2,EGFR,TNF,CTNNB1,CDH1,PTGS2
GO: Cellular Component	GO:0098857	membrane microdomain	3.83e-05	0.0114	0.000601	0.00377	7	KRAS,ERBB2,EGFR,TNF,CTNNB1,CDH1,PTGS2
GO: Cellular Component	GO:0005925	focal adhesion	9.03e-05	0.0269	0.00108	0.00676	7	KRAS,EGFR,CD44,CTNNB1,MMP14,CDH1,SDC1
GO: Cellular Component	GO:0005924	cell-substrate adherens junction	9.77e-05	0.0291	0.00112	0.00703	7	KRAS,EGFR,CD44,CTNNB1,MMP14,CDH1,SDC1
GO: Cellular Component	GO:0030055	cell-substrate junction	0.000106	0.0315	0.00117	0.00732	7	KRAS,EGFR,CD44,CTNNB1,MMP14,CDH1,SDC1
GO: Cellular Component	GO:0045177	apical part of cell	0.000153	0.0457	0.00158	0.00988	7	ERBB2,EGFR,SPP1,CD44,CTNNB1,PTEN,CDH1
GO: Cellular Component	GO:0043025	neuronal cell body	0.00135	0.401	0.00787	0.0494	7	TGFB1,MET,ESR1,ESR2,APC,PGR,DNMT1
GO: Cellular Component	GO:0044433	cytoplasmic vesicle part	0.00139	0.413	0.00794	0.0498	7	TGFB1,SPARC,IGF2,EGFR,TIMP1,TIMP3,MDM2
GO: Cellular Component	GO:1990234	transferase complex	0.0033	0.983	0.0141	0.0882	7	CCNE1,CDKN1B,BRCA1,EZH2,SKP2,TERT,CDK6
GO: Cellular Component	GO:0044451	nucleoplasm part	0.00356	1	0.0147	0.0925	7	MYC,CDKN2A,WT1,PTEN,MDM2,EZH2,TERT
GO: Molecular Function	GO:0019887	protein kinase regulator activity	1.65e-05	0.00627	0.000363	0.00237	6	TGFB1,CCNE1,CDKN1B,CDKN2A,IGF2,APC
GO: Molecular Function	GO:0019207	kinase regulator activity	2.93e-05	0.0112	0.000558	0.00364	6	TGFB1,CCNE1,CDKN1B,CDKN2A,IGF2,APC
GO: Molecular Function	GO:0061134	peptidase regulator activity	3.42e-05	0.013	0.00062	0.00404	6	CDKN1B,PTTG1,SERPINB5,TIMP1,TIMP3,MMP14
GO: Molecular Function	GO:0031625	ubiquitin protein ligase binding	0.000107	0.0409	0.0013	0.0085	6	MYC,ERBB2,BRCA1,EGFR,BCL2,MDM2
GO: Molecular Function	GO:0044389	ubiquitin-like protein ligase binding	0.000116	0.0443	0.0013	0.0085	6	MYC,ERBB2,BRCA1,EGFR,BCL2,MDM2
GO: Molecular Function	GO:0004857	enzyme inhibitor activity	0.000754	0.287	0.00465	0.0303	6	CDKN1B,CDKN2A,PTTG1,SERPINB5,TIMP1,TIMP3
GO: Molecular Function	GO:0003682	chromatin binding	0.00292	1	0.0127	0.0825	6	BRCA1,EGFR,ESR1,CTNNB1,EZH2,DNMT1
GO: Molecular Function	GO:0008134	transcription factor binding	0.0055	1	0.0186	0.121	6	MYC,CDKN2A,ESR1,BCL2,CTNNB1,TERT
GO: Molecular Function	GO:0000977	RNA polymerase II regulatory region sequence-specific DNA binding	0.00788	1	0.0246	0.161	6	MYC,ESR1,ESR2,RUNX3,EZH2,PGR
GO: Molecular Function	GO:0001012	RNA polymerase II regulatory region DNA binding	0.00823	1	0.0246	0.161	6	MYC,ESR1,ESR2,RUNX3,EZH2,PGR
GO: Molecular Function	GO:0000981	RNA polymerase II transcription factor activity, sequence-specific DNA binding	0.0109	1	0.0298	0.194	6	MYC,ESR1,ESR2,WT1,RUNX3,PGR
GO: Molecular Function	GO:0008289	lipid binding	0.0129	1	0.0341	0.223	6	ESR1,ESR2,AKT1,PTEN,PTGS2,PGR
GO: Molecular Function	GO:0000976	transcription regulatory region sequence-specific DNA binding	0.0132	1	0.0345	0.225	6	MYC,ESR1,ESR2,RUNX3,EZH2,PGR
GO: Molecular Function	GO:0005509	calcium ion binding	0.0135	1	0.0345	0.225	6	SPARC,BRAF,MMP1,MMP12,MMP14,CDH1
GO: Biological Process	GO:0060512	prostate gland morphogenesis	5.37e-10	2.09e-06	9.88e-09	8.74e-08	6	SERPINB5,ESR1,ESR2,CD44,FGFR2,MMP2
GO: Biological Process	GO:0007435	salivary gland morphogenesis	1.47e-09	5.7e-06	2.4e-08	2.12e-07	6	TGFB1,MET,EGFR,TNF,FGFR2,CDH1
GO: Biological Process	GO:0007431	salivary gland development	2.29e-09	8.9e-06	3.5e-08	3.1e-07	6	TGFB1,MET,EGFR,TNF,FGFR2,CDH1
GO: Biological Process	GO:0014911	positive regulation of smooth muscle cell migration	4.49e-09	1.74e-05	6.41e-08	5.67e-07	6	MYC,BCL2,MMP1,MDM2,TERT,PGR
GO: Biological Process	GO:0007566	embryo implantation	1.28e-08	4.95e-05	1.67e-07	1.48e-06	6	TIMP1,SPP1,MMP2,MMP9,CDH1,PTGS2
GO: Biological Process	GO:0032768	regulation of monooxygenase activity	1.74e-08	6.75e-05	2.18e-07	1.93e-06	6	KRAS,EGFR,ESR1,AKT1,TNF,TERT
GO: Biological Process	GO:0001658	branching involved in ureteric bud morphogenesis	2.33e-08	9.06e-05	2.84e-07	2.51e-06	6	TGFB1,MYC,CD44,WT1,BCL2,CTNNB1
GO: Biological Process	GO:0060135	maternal process involved in female pregnancy	3.38e-08	0.000131	4.02e-07	3.56e-06	6	SPP1,ESR1,AKT1,CDH1,PTGS2,PGR
GO: Biological Process	GO:0060675	ureteric bud morphogenesis	4.03e-08	0.000156	4.71e-07	4.17e-06	6	TGFB1,MYC,CD44,WT1,BCL2,CTNNB1
GO: Biological Process	GO:0072171	mesonephric tubule morphogenesis	4.39e-08	0.000171	5.06e-07	4.47e-06	6	TGFB1,MYC,CD44,WT1,BCL2,CTNNB1
GO: Biological Process	GO:0001541	ovarian follicle development	5.64e-08	0.000219	6.3e-07	5.57e-06	6	CCNE1,ESR1,ESR2,BCL2,MMP2,MMP14
GO: Biological Process	GO:0051782	negative regulation of cell division	6.12e-08	0.000238	6.75e-07	5.97e-06	6	MYC,PTTG1,ESR1,APC,MSH2,FGFR2
GO: Biological Process	GO:0048678	response to axon injury	7.75e-08	0.000301	8.34e-07	7.38e-06	6	ERBB2,BRAF,SPP1,BCL2,MMP2,PTEN
GO: Biological Process	GO:0072078	nephron tubule morphogenesis	8.37e-08	0.000325	8.94e-07	7.9e-06	6	TGFB1,MYC,CD44,WT1,BCL2,CTNNB1
GO: Biological Process	GO:0061180	mammary gland epithelium development	9.03e-08	0.000351	9.56e-07	8.46e-06	6	TGFB1,CDKN2A,ESR1,AKT1,FGFR2,PGR
GO: Biological Process	GO:0072088	nephron epithelium morphogenesis	9.74e-08	0.000378	1.02e-06	9.04e-06	6	TGFB1,MYC,CD44,WT1,BCL2,CTNNB1
GO: Biological Process	GO:0072028	nephron morphogenesis	1.13e-07	0.000438	1.17e-06	1.04e-05	6	TGFB1,MYC,CD44,WT1,BCL2,CTNNB1
GO: Biological Process	GO:0061333	renal tubule morphogenesis	1.21e-07	0.000471	1.24e-06	1.1e-05	6	TGFB1,MYC,CD44,WT1,BCL2,CTNNB1
GO: Biological Process	GO:0033077	T cell differentiation in thymus	1.5e-07	0.000581	1.49e-06	1.32e-05	6	CDKN2A,ERBB2,APC,BCL2,CTNNB1,CDK6
GO: Biological Process	GO:0071594	thymocyte aggregation	1.5e-07	0.000581	1.49e-06	1.32e-05	6	CDKN2A,ERBB2,APC,BCL2,CTNNB1,CDK6
GO: Biological Process	GO:0000079	regulation of cyclin-dependent protein serine/threonine kinase activity	2.38e-07	0.000923	2.27e-06	2.01e-05	6	CDKN1B,CDKN2A,EGFR,APC,AKT1,PTEN
GO: Biological Process	GO:0051149	positive regulation of muscle cell differentiation	2.53e-07	0.000983	2.39e-06	2.12e-05	6	TGFB1,IGFBP3,GDF15,BCL2,CTNNB1,MMP14
GO: Biological Process	GO:0007569	cell aging	2.69e-07	0.00105	2.49e-06	2.2e-05	6	CDKN2A,KRAS,BCL2,PTEN,TERT,CDK6
GO: Biological Process	GO:0051341	regulation of oxidoreductase activity	2.69e-07	0.00105	2.49e-06	2.2e-05	6	KRAS,EGFR,ESR1,AKT1,TNF,TERT
GO: Biological Process	GO:0072080	nephron tubule development	3.05e-07	0.00118	2.79e-06	2.47e-05	6	TGFB1,MYC,CD44,WT1,BCL2,CTNNB1
GO: Biological Process	GO:1904029	regulation of cyclin-dependent protein kinase activity	3.24e-07	0.00126	2.95e-06	2.61e-05	6	CDKN1B,CDKN2A,EGFR,APC,AKT1,PTEN
GO: Biological Process	GO:0060993	kidney morphogenesis	3.64e-07	0.00142	3.29e-06	2.91e-05	6	TGFB1,MYC,CD44,WT1,BCL2,CTNNB1
GO: Biological Process	GO:2000379	positive regulation of reactive oxygen species metabolic process	3.64e-07	0.00142	3.29e-06	2.91e-05	6	TGFB1,EGFR,ESR1,AKT1,TNF,PTGS2
GO: Biological Process	GO:0061326	renal tubule development	3.86e-07	0.0015	3.46e-06	3.06e-05	6	TGFB1,MYC,CD44,WT1,BCL2,CTNNB1
GO: Biological Process	GO:0042307	positive regulation of protein import into nucleus	4.85e-07	0.00189	4.27e-06	3.77e-05	6	TGFB1,BRCA1,EGFR,TNF,CDH1,PTGS2
GO: Biological Process	GO:0071156	regulation of cell cycle arrest	5.42e-07	0.00211	4.7e-06	4.16e-05	6	TGFB1,CDKN1B,CDKN2A,BRCA1,RASSF1,MDM2
GO: Biological Process	GO:0030330	DNA damage response, signal transduction by p53 class mediator	5.42e-07	0.00211	4.7e-06	4.16e-05	6	CDKN1B,CDKN2A,NDRG1,BRCA1,CD44,MDM2
GO: Biological Process	GO:1904591	positive regulation of protein import	5.72e-07	0.00222	4.93e-06	4.36e-05	6	TGFB1,BRCA1,EGFR,TNF,CDH1,PTGS2
GO: Biological Process	GO:0010634	positive regulation of epithelial cell migration	6.04e-07	0.00235	5.17e-06	4.57e-05	6	TGFB1,MET,SPARC,AKT1,MMP9,PTGS2
GO: Biological Process	GO:0008630	intrinsic apoptotic signaling pathway in response to DNA damage	6.72e-07	0.00261	5.65e-06	5e-05	6	MYC,BRCA1,CD44,BCL2,TNF,MSH2
GO: Biological Process	GO:0072009	nephron epithelium development	7.46e-07	0.0029	6.22e-06	5.5e-05	6	TGFB1,MYC,CD44,WT1,BCL2,CTNNB1
GO: Biological Process	GO:0010827	regulation of glucose transmembrane transport	9.14e-07	0.00355	7.41e-06	6.55e-05	6	MYC,MET,ESR1,AKT1,TNF,TERT
GO: Biological Process	GO:0042770	signal transduction in response to DNA damage	1.11e-06	0.00432	8.81e-06	7.79e-05	6	CDKN1B,CDKN2A,NDRG1,BRCA1,CD44,MDM2
GO: Biological Process	GO:0032963	collagen metabolic process	1.11e-06	0.00432	8.81e-06	7.79e-05	6	TGFB1,MMP1,MMP2,MMP9,MMP12,MMP14
GO: Biological Process	GO:0045667	regulation of osteoblast differentiation	1.17e-06	0.00453	9.19e-06	8.13e-05	6	CYR61,APC,TNF,FGFR2,CTNNB1,CDK6
GO: Biological Process	GO:0044259	multicellular organismal macromolecule metabolic process	1.41e-06	0.00546	1.09e-05	9.63e-05	6	TGFB1,MMP1,MMP2,MMP9,MMP12,MMP14
GO: Biological Process	GO:0045931	positive regulation of mitotic cell cycle	1.76e-06	0.00685	1.32e-05	0.000117	6	TGFB1,MET,IGF2,TNF,MDM2,TERT
GO: Biological Process	GO:0051781	positive regulation of cell division	2.48e-06	0.00965	1.79e-05	0.000159	6	TGFB1,MET,IGF2,APC,TNF,FGFR2
GO: Biological Process	GO:1903707	negative regulation of hemopoiesis	2.7e-06	0.0105	1.92e-05	0.000169	6	MYC,CDKN2A,ERBB2,CD44,CTNNB1,CDK6
GO: Biological Process	GO:0044236	multicellular organism metabolic process	2.93e-06	0.0114	2.06e-05	0.000182	6	TGFB1,MMP1,MMP2,MMP9,MMP12,MMP14
GO: Biological Process	GO:0072006	nephron development	2.93e-06	0.0114	2.06e-05	0.000182	6	TGFB1,MYC,CD44,WT1,BCL2,CTNNB1
GO: Biological Process	GO:0043271	negative regulation of ion transport	3.04e-06	0.0118	2.13e-05	0.000188	6	TGFB1,AKT1,BCL2,TNF,MMP9,PTGS2
GO: Biological Process	GO:0046683	response to organophosphorus	3.17e-06	0.0123	2.21e-05	0.000195	6	SPARC,BRAF,WT1,PTEN,SDC1,PTGS2
GO: Biological Process	GO:0045471	response to ethanol	3.43e-06	0.0133	2.34e-05	0.000207	6	CCNE1,SPARC,IGF2,ESR2,PTEN,DNMT1
GO: Biological Process	GO:0045834	positive regulation of lipid metabolic process	4e-06	0.0155	2.67e-05	0.000236	6	TGFB1,IGF2,CYR61,AKT1,TNF,PTGS2
GO: Biological Process	GO:0030879	mammary gland development	4e-06	0.0155	2.67e-05	0.000236	6	TGFB1,CDKN2A,ESR1,AKT1,FGFR2,PGR
GO: Biological Process	GO:2001020	regulation of response to DNA damage stimulus	4.65e-06	0.0181	3.03e-05	0.000268	6	MYC,CDKN2A,BRCA1,EGFR,CD44,MDM2
GO: Biological Process	GO:0046890	regulation of lipid biosynthetic process	4.65e-06	0.0181	3.03e-05	0.000268	6	IGF2,BRCA1,CYR61,AKT1,TNF,PTGS2
GO: Biological Process	GO:1901991	negative regulation of mitotic cell cycle phase transition	5.19e-06	0.0202	3.35e-05	0.000296	6	CDKN1B,APC,BCL2,PTEN,MDM2,EZH2
GO: Biological Process	GO:0043491	protein kinase B signaling	5.57e-06	0.0217	3.57e-05	0.000316	6	TGFB1,IGF2,EGFR,AKT1,TNF,PTEN
GO: Biological Process	GO:0043542	endothelial cell migration	6.2e-06	0.0241	3.92e-05	0.000346	6	TGFB1,MET,SPARC,AKT1,PTEN,PTGS2
GO: Biological Process	GO:0010952	positive regulation of peptidase activity	6.2e-06	0.0241	3.92e-05	0.000346	6	MYC,CDKN1B,CDKN2A,CYR61,TNF,MMP14
GO: Biological Process	GO:0035265	organ growth	6.88e-06	0.0267	4.32e-05	0.000382	6	ESR1,WT1,BCL2,FGFR2,CTNNB1,PTEN
GO: Biological Process	GO:1901988	negative regulation of cell cycle phase transition	7.62e-06	0.0296	4.77e-05	0.000421	6	CDKN1B,APC,BCL2,PTEN,MDM2,EZH2
GO: Biological Process	GO:0042129	regulation of T cell proliferation	8.42e-06	0.0327	5.23e-05	0.000463	6	TGFB1,CDKN2A,ERBB2,IGF2,CD44,CTNNB1
GO: Biological Process	GO:0010632	regulation of epithelial cell migration	8.99e-06	0.0349	5.55e-05	0.000491	6	TGFB1,MET,SPARC,AKT1,MMP9,PTGS2
GO: Biological Process	GO:0042306	regulation of protein import into nucleus	1.35e-05	0.0526	8.07e-05	0.000714	6	TGFB1,BRCA1,EGFR,TNF,CDH1,PTGS2
GO: Biological Process	GO:1904589	regulation of protein import	1.52e-05	0.0592	8.92e-05	0.000789	6	TGFB1,BRCA1,EGFR,TNF,CDH1,PTGS2
GO: Biological Process	GO:2001235	positive regulation of apoptotic signaling pathway	1.57e-05	0.061	9.16e-05	0.00081	6	MYC,TIMP3,BCL2,MMP9,RUNX3,PTEN
GO: Biological Process	GO:0051216	cartilage development	1.76e-05	0.0685	0.000102	0.000903	6	TGFB1,CYR61,TIMP1,CD44,CTNNB1,RUNX3
GO: Biological Process	GO:0060538	skeletal muscle organ development	1.82e-05	0.0705	0.000104	0.000922	6	TGFB1,MYC,MET,WT1,BCL2,CTNNB1
GO: Biological Process	GO:0003018	vascular process in circulatory system	2.03e-05	0.0789	0.000116	0.00102	6	TGFB1,EGFR,ESR2,AKT1,MMP2,PTGS2
GO: Biological Process	GO:0071229	cellular response to acid chemical	2.27e-05	0.0882	0.000127	0.00112	6	EGFR,AKT1,TNF,MMP2,CDH1,DNMT1
GO: Biological Process	GO:0031668	cellular response to extracellular stimulus	2.67e-05	0.104	0.000146	0.00129	6	CCNE1,KIAA1324,BCL2,MMP9,MDM2,SKP2
GO: Biological Process	GO:0048738	cardiac muscle tissue development	2.89e-05	0.112	0.000156	0.00138	6	TGFB1,MET,WT1,FGFR2,CTNNB1,PTEN
GO: Biological Process	GO:0042098	T cell proliferation	2.89e-05	0.112	0.000156	0.00138	6	TGFB1,CDKN2A,ERBB2,IGF2,CD44,CTNNB1
GO: Biological Process	GO:0002573	myeloid leukocyte differentiation	2.89e-05	0.112	0.000156	0.00138	6	TGFB1,MYC,APC,TNF,CTNNB1,MMP9
GO: Biological Process	GO:0030336	negative regulation of cell migration	3.63e-05	0.141	0.00019	0.00168	6	TGFB1,IGFBP3,BRAF,TIMP1,BCL2,PTEN
GO: Biological Process	GO:0031334	positive regulation of protein complex assembly	4.01e-05	0.156	0.000208	0.00184	6	TGFB1,CDKN1B,APC,TNF,MMP1,CTNNB1
GO: Biological Process	GO:0048705	skeletal system morphogenesis	4.31e-05	0.168	0.000223	0.00197	6	TGFB1,MYC,FGFR2,MMP2,CTNNB1,MMP14
GO: Biological Process	GO:2000146	negative regulation of cell motility	4.75e-05	0.184	0.000243	0.00215	6	TGFB1,IGFBP3,BRAF,TIMP1,BCL2,PTEN
GO: Biological Process	GO:0009743	response to carbohydrate	5.59e-05	0.217	0.000282	0.0025	6	TGFB1,CDKN1B,SPARC,PTEN,MDM2,PTGS2
GO: Biological Process	GO:0045732	positive regulation of protein catabolic process	9.82e-05	0.381	0.000461	0.00408	6	CDKN1B,APC,AKT1,TNF,PTEN,MDM2
GO: Biological Process	GO:0045165	cell fate commitment	0.000111	0.431	0.000511	0.00452	6	TGFB1,WT1,APC,BCL2,FGFR2,CTNNB1
GO: Biological Process	GO:0050768	negative regulation of neurogenesis	0.000137	0.534	0.000607	0.00536	6	TGFB1,SPP1,CTNNB1,PTEN,MDM2,TERT
GO: Biological Process	GO:1903320	regulation of protein modification by small protein conjugation or removal	0.000151	0.587	0.000662	0.00585	6	CDKN2A,BRCA1,RASSF1,CTNNB1,PTEN,SKP2
GO: Biological Process	GO:0007009	plasma membrane organization	0.000154	0.598	0.000673	0.00595	6	TGFB1,NDRG1,AKT1,TNF,PTEN,CDH1
GO: Biological Process	GO:0040013	negative regulation of locomotion	0.000163	0.632	0.0007	0.00619	6	TGFB1,IGFBP3,BRAF,TIMP1,BCL2,PTEN
GO: Biological Process	GO:0048863	stem cell differentiation	0.000192	0.744	0.000807	0.00714	6	TGFB1,BCL2,FGFR2,CTNNB1,EZH2,CDK6
GO: Biological Process	GO:0045055	regulated exocytosis	0.000236	0.918	0.00097	0.00858	6	TGFB1,SPARC,IGF2,BRAF,TIMP1,TIMP3
GO: Biological Process	GO:0022412	cellular process involved in reproduction in multicellular organism	0.00027	1	0.00108	0.00959	6	TGFB1,WT1,AKT1,BCL2,MSH2,CTNNB1
GO: Biological Process	GO:1903522	regulation of blood circulation	0.000323	1	0.00128	0.0113	6	EGFR,ESR2,AKT1,MMP2,MDM2,PTGS2
GO: Biological Process	GO:0043010	camera-type eye development	0.00035	1	0.00136	0.012	6	TGFB1,EGFR,WT1,APC,FGFR2,CTNNB1
GO: Biological Process	GO:0032496	response to lipopolysaccharide	0.000367	1	0.00142	0.0125	6	TGFB1,SPARC,AKT1,TNF,PTGS2,DNMT1
GO: Biological Process	GO:0048638	regulation of developmental growth	0.000373	1	0.00144	0.0127	6	IGF2,SPP1,WT1,BCL2,FGFR2,PTEN
GO: Biological Process	GO:0006260	DNA replication	0.00039	1	0.0015	0.0132	6	TGFB1,CCNE1,MET,BRCA1,EGFR,CTNNB1
GO: Biological Process	GO:0002237	response to molecule of bacterial origin	0.000467	1	0.00173	0.0153	6	TGFB1,SPARC,AKT1,TNF,PTGS2,DNMT1
GO: Biological Process	GO:0050900	leukocyte migration	0.000694	1	0.00243	0.0215	6	KRAS,SPP1,CD44,TNF,MMP1,MMP9
GO: Biological Process	GO:0042391	regulation of membrane potential	0.000742	1	0.00259	0.0229	6	MYC,CDKN2A,MET,BCL2,TNF,PTEN
GO: Biological Process	GO:0043161	proteasome-mediated ubiquitin-dependent protein catabolic process	0.000762	1	0.00264	0.0234	6	PTTG1,APC,AKT1,CTNNB1,MDM2,SKP2
GO: Biological Process	GO:0043254	regulation of protein complex assembly	0.000836	1	0.00286	0.0253	6	TGFB1,CDKN1B,APC,TNF,MMP1,CTNNB1
GO: Biological Process	GO:0010498	proteasomal protein catabolic process	0.0011	1	0.00362	0.032	6	PTTG1,APC,AKT1,CTNNB1,MDM2,SKP2
GO: Biological Process	GO:0016570	histone modification	0.00148	1	0.00464	0.0411	6	TGFB1,BRCA1,CTNNB1,EZH2,TERT,DNMT1
GO: Biological Process	GO:0051493	regulation of cytoskeleton organization	0.00157	1	0.00488	0.0431	6	TGFB1,CDKN1B,BRCA1,BRAF,APC,CTNNB1
GO: Biological Process	GO:0016569	covalent chromatin modification	0.00175	1	0.00538	0.0475	6	TGFB1,BRCA1,CTNNB1,EZH2,TERT,DNMT1
GO: Biological Process	GO:0050769	positive regulation of neurogenesis	0.00181	1	0.00554	0.049	6	MYC,MET,BRAF,BCL2,CTNNB1,EZH2
GO: Biological Process	GO:0051962	positive regulation of nervous system development	0.0035	1	0.00954	0.0844	6	MYC,MET,BRAF,BCL2,CTNNB1,EZH2
GO: Biological Process	GO:0010256	endomembrane system organization	0.00528	1	0.0136	0.12	6	TGFB1,NDRG1,AKT1,TNF,PTEN,CDH1
GO: Biological Process	GO:0009617	response to bacterium	0.00583	1	0.0142	0.126	6	TGFB1,SPARC,AKT1,TNF,PTGS2,DNMT1
GO: Biological Process	GO:0001817	regulation of cytokine production	0.00801	1	0.0186	0.164	6	TGFB1,MET,BRCA1,TNF,CTNNB1,PTGS2
GO: Biological Process	GO:0071345	cellular response to cytokine stimulus	0.0141	1	0.0277	0.245	6	MYC,KRAS,BRCA1,CD44,AKT1,TNF
GO: Biological Process	GO:0007005	mitochondrion organization	0.0195	1	0.0353	0.312	6	MYC,CDKN2A,AKT1,BCL2,MMP9,TERT
GO: Cellular Component	GO:0031983	vesicle lumen	4.74e-07	0.000141	7.06e-05	0.000443	6	TGFB1,SPARC,IGF2,EGFR,TIMP1,TIMP3
GO: Cellular Component	GO:0016323	basolateral plasma membrane	5.15e-05	0.0153	0.000703	0.00441	6	MET,ERBB2,EGFR,CD44,CTNNB1,CDH1
GO: Cellular Component	GO:0000790	nuclear chromatin	0.000243	0.0723	0.00219	0.0138	6	MYC,IGFBP3,ESR1,CTNNB1,RUNX3,EZH2
GO: Cellular Component	GO:0016604	nuclear body	0.000452	0.135	0.00364	0.0228	6	MYC,CDKN2A,WT1,PTEN,MDM2,TERT
GO: Cellular Component	GO:0030141	secretory granule	0.000741	0.221	0.00496	0.0311	6	TGFB1,SPARC,IGF2,TIMP1,TIMP3,TNF
GO: Cellular Component	GO:0005813	centrosome	0.00234	0.697	0.0116	0.0729	6	CCNE1,NDRG1,BRCA1,APC,CTNNB1,CDK6
GO: Cellular Component	GO:0098552	side of membrane	0.00256	0.762	0.0125	0.0784	6	KRAS,CD44,TNF,PTEN,CDH1,SDC1
GO: Cellular Component	GO:0099503	secretory vesicle	0.00324	0.965	0.0141	0.0882	6	TGFB1,SPARC,IGF2,TIMP1,TIMP3,TNF
GO: Cellular Component	GO:0030424	axon	0.0043	1	0.0176	0.11	6	TGFB1,MYC,ESR1,APC,CDH1,PGR
GO: Cellular Component	GO:0044456	synapse part	0.0123	1	0.0351	0.22	6	MET,ERBB2,ESR1,AKT1,PTEN,PGR
GO: Molecular Function	GO:0004222	metalloendopeptidase activity	1.54e-05	0.00588	0.000363	0.00237	5	MMP1,MMP2,MMP9,MMP12,MMP14
GO: Molecular Function	GO:0002020	protease binding	1.68e-05	0.0064	0.000363	0.00237	5	TIMP1,TIMP3,APC,BCL2,TNF
GO: Molecular Function	GO:0019838	growth factor binding	4.63e-05	0.0177	0.000736	0.0048	5	ERBB2,IGFBP3,CYR61,EGFR,FGFR2
GO: Molecular Function	GO:0008237	metallopeptidase activity	0.000174	0.0664	0.00169	0.0111	5	MMP1,MMP2,MMP9,MMP12,MMP14
GO: Molecular Function	GO:0004252	serine-type endopeptidase activity	0.000324	0.124	0.00275	0.0179	5	MMP1,MMP2,MMP9,MMP12,MMP14
GO: Molecular Function	GO:0005125	cytokine activity	0.000376	0.143	0.00292	0.0191	5	TGFB1,TIMP1,SPP1,GDF15,TNF
GO: Molecular Function	GO:0008236	serine-type peptidase activity	0.000557	0.212	0.0039	0.0255	5	MMP1,MMP2,MMP9,MMP12,MMP14
GO: Molecular Function	GO:0017171	serine hydrolase activity	0.000589	0.224	0.0039	0.0255	5	MMP1,MMP2,MMP9,MMP12,MMP14
GO: Molecular Function	GO:0001077	transcriptional activator activity, RNA polymerase II proximal promoter sequence-specific DNA binding	0.000756	0.288	0.00465	0.0303	5	MYC,ESR1,ESR2,WT1,PGR
GO: Molecular Function	GO:0001228	transcriptional activator activity, RNA polymerase II transcription regulatory region sequence-specific DNA binding	0.0031	1	0.0129	0.0842	5	MYC,ESR1,ESR2,WT1,PGR
GO: Molecular Function	GO:0000982	transcription factor activity, RNA polymerase II proximal promoter sequence-specific DNA binding	0.00341	1	0.0137	0.0891	5	MYC,ESR1,ESR2,WT1,PGR
GO: Molecular Function	GO:0004175	endopeptidase activity	0.0087	1	0.0253	0.165	5	MMP1,MMP2,MMP9,MMP12,MMP14
GO: Molecular Function	GO:0008047	enzyme activator activity	0.0141	1	0.0348	0.227	5	TGFB1,CDKN1B,IGF2,IGFBP3,MMP14
GO: Biological Process	GO:0032770	positive regulation of monooxygenase activity	1.57e-08	6.11e-05	2.04e-07	1.8e-06	5	KRAS,ESR1,AKT1,TNF,TERT
GO: Biological Process	GO:0060740	prostate gland epithelium morphogenesis	3.12e-08	0.000121	3.73e-07	3.3e-06	5	ESR1,ESR2,CD44,FGFR2,MMP2
GO: Biological Process	GO:0001893	maternal placenta development	4.25e-08	0.000165	4.92e-07	4.35e-06	5	SPP1,ESR1,AKT1,CDH1,PTGS2
GO: Biological Process	GO:0090342	regulation of cell aging	4.92e-08	0.000191	5.59e-07	4.94e-06	5	CDKN2A,KRAS,PTEN,TERT,CDK6
GO: Biological Process	GO:0071391	cellular response to estrogen stimulus	1.75e-07	0.000681	1.72e-06	1.52e-05	5	EGFR,ESR1,ESR2,MMP2,MDM2
GO: Biological Process	GO:0031103	axon regeneration	2.42e-07	0.000941	2.31e-06	2.04e-05	5	BRAF,SPP1,BCL2,MMP2,PTEN
GO: Biological Process	GO:0045429	positive regulation of nitric oxide biosynthetic process	2.69e-07	0.00104	2.49e-06	2.2e-05	5	EGFR,ESR1,AKT1,TNF,PTGS2
GO: Biological Process	GO:0051353	positive regulation of oxidoreductase activity	2.69e-07	0.00104	2.49e-06	2.2e-05	5	KRAS,ESR1,AKT1,TNF,TERT
GO: Biological Process	GO:1904407	positive regulation of nitric oxide metabolic process	2.69e-07	0.00104	2.49e-06	2.2e-05	5	EGFR,ESR1,AKT1,TNF,PTGS2
GO: Biological Process	GO:0050999	regulation of nitric-oxide synthase activity	2.69e-07	0.00104	2.49e-06	2.2e-05	5	KRAS,EGFR,ESR1,AKT1,TERT
GO: Biological Process	GO:0060968	regulation of gene silencing	5.23e-07	0.00203	4.58e-06	4.05e-05	5	TGFB1,EGFR,ESR1,TERT,DNMT1
GO: Biological Process	GO:2000242	negative regulation of reproductive process	5.71e-07	0.00222	4.93e-06	4.36e-05	5	CDKN1B,TIMP1,WT1,APC,MSH2
GO: Biological Process	GO:1903428	positive regulation of reactive oxygen species biosynthetic process	6.23e-07	0.00242	5.3e-06	4.69e-05	5	EGFR,ESR1,AKT1,TNF,PTGS2
GO: Biological Process	GO:0060443	mammary gland morphogenesis	6.78e-07	0.00263	5.67e-06	5.02e-05	5	TGFB1,CDKN2A,ESR1,FGFR2,PGR
GO: Biological Process	GO:0031102	neuron projection regeneration	6.78e-07	0.00263	5.67e-06	5.02e-05	5	BRAF,SPP1,BCL2,MMP2,PTEN
GO: Biological Process	GO:0051784	negative regulation of nuclear division	7.37e-07	0.00286	6.15e-06	5.44e-05	5	PTTG1,ESR1,APC,MSH2,FGFR2
GO: Biological Process	GO:0045428	regulation of nitric oxide biosynthetic process	9.38e-07	0.00364	7.55e-06	6.67e-05	5	EGFR,ESR1,AKT1,TNF,PTGS2
GO: Biological Process	GO:0071230	cellular response to amino acid stimulus	1.01e-06	0.00394	8.12e-06	7.18e-05	5	EGFR,TNF,MMP2,CDH1,DNMT1
GO: Biological Process	GO:0030574	collagen catabolic process	1.18e-06	0.00459	9.27e-06	8.19e-05	5	MMP1,MMP2,MMP9,MMP12,MMP14
GO: Biological Process	GO:0048146	positive regulation of fibroblast proliferation	1.18e-06	0.00459	9.27e-06	8.19e-05	5	TGFB1,MYC,EGFR,ESR1,CDK6
GO: Biological Process	GO:0010595	positive regulation of endothelial cell migration	1.58e-06	0.00613	1.21e-05	0.000107	5	TGFB1,MET,SPARC,AKT1,PTGS2
GO: Biological Process	GO:0044243	multicellular organismal catabolic process	1.94e-06	0.00754	1.44e-05	0.000127	5	MMP1,MMP2,MMP9,MMP12,MMP14
GO: Biological Process	GO:0046324	regulation of glucose import	2.08e-06	0.00806	1.52e-05	0.000135	5	MYC,ESR1,AKT1,TNF,TERT
GO: Biological Process	GO:0006809	nitric oxide biosynthetic process	2.08e-06	0.00806	1.52e-05	0.000135	5	EGFR,ESR1,AKT1,TNF,PTGS2
GO: Biological Process	GO:0046209	nitric oxide metabolic process	2.69e-06	0.0104	1.91e-05	0.000169	5	EGFR,ESR1,AKT1,TNF,PTGS2
GO: Biological Process	GO:2001057	reactive nitrogen species metabolic process	3.43e-06	0.0133	2.34e-05	0.000207	5	EGFR,ESR1,AKT1,TNF,PTGS2
GO: Biological Process	GO:1903426	regulation of reactive oxygen species biosynthetic process	3.43e-06	0.0133	2.34e-05	0.000207	5	EGFR,ESR1,AKT1,TNF,PTGS2
GO: Biological Process	GO:0071158	positive regulation of cell cycle arrest	3.86e-06	0.015	2.6e-05	0.00023	5	TGFB1,CDKN1B,CDKN2A,BRCA1,MDM2
GO: Biological Process	GO:0046889	positive regulation of lipid biosynthetic process	3.86e-06	0.015	2.6e-05	0.00023	5	IGF2,CYR61,AKT1,TNF,PTGS2
GO: Biological Process	GO:0042058	regulation of epidermal growth factor receptor signaling pathway	3.86e-06	0.015	2.6e-05	0.00023	5	EGFR,ESR1,ESR2,AKT1,MMP9
GO: Biological Process	GO:0045445	myoblast differentiation	4.33e-06	0.0168	2.86e-05	0.000253	5	TGFB1,IGFBP3,TNF,CTNNB1,SDC1
GO: Biological Process	GO:1901184	regulation of ERBB signaling pathway	4.58e-06	0.0178	3e-05	0.000266	5	EGFR,ESR1,ESR2,AKT1,MMP9
GO: Biological Process	GO:0046323	glucose import	4.58e-06	0.0178	3e-05	0.000266	5	MYC,ESR1,AKT1,TNF,TERT
GO: Biological Process	GO:0007492	endoderm development	5.12e-06	0.0199	3.32e-05	0.000293	5	TGFB1,MMP2,CTNNB1,MMP9,MMP14
GO: Biological Process	GO:1902106	negative regulation of leukocyte differentiation	5.41e-06	0.021	3.47e-05	0.000307	5	MYC,CDKN2A,ERBB2,CD44,CTNNB1
GO: Biological Process	GO:0031016	pancreas development	5.7e-06	0.0222	3.65e-05	0.000322	5	IGF2,APC,AKT1,CTNNB1,CDK6
GO: Biological Process	GO:0008625	extrinsic apoptotic signaling pathway via death domain receptors	6.02e-06	0.0234	3.82e-05	0.000338	5	BRCA1,TIMP3,BCL2,TNF,PTEN
GO: Biological Process	GO:0001952	regulation of cell-matrix adhesion	6.68e-06	0.026	4.21e-05	0.000372	5	CDKN2A,BCL2,PTEN,MMP14,CDK6
GO: Biological Process	GO:2000134	negative regulation of G1/S transition of mitotic cell cycle	7.78e-06	0.0302	4.85e-05	0.000429	5	CDKN1B,BCL2,PTEN,MDM2,EZH2
GO: Biological Process	GO:0051153	regulation of striated muscle cell differentiation	8.59e-06	0.0334	5.33e-05	0.000471	5	TGFB1,GDF15,BCL2,EZH2,MMP14
GO: Biological Process	GO:1902807	negative regulation of cell cycle G1/S phase transition	9.02e-06	0.035	5.56e-05	0.000492	5	CDKN1B,BCL2,PTEN,MDM2,EZH2
GO: Biological Process	GO:1903409	reactive oxygen species biosynthetic process	1.04e-05	0.0404	6.31e-05	0.000558	5	EGFR,ESR1,AKT1,TNF,PTGS2
GO: Biological Process	GO:0002576	platelet degranulation	1.2e-05	0.0464	7.15e-05	0.000633	5	TGFB1,SPARC,IGF2,TIMP1,TIMP3
GO: Biological Process	GO:0021761	limbic system development	1.37e-05	0.0531	8.12e-05	0.000718	5	ESR2,FGFR2,PTEN,EZH2,CDK6
GO: Biological Process	GO:0072091	regulation of stem cell proliferation	1.43e-05	0.0555	8.44e-05	0.000747	5	TGFB1,MYC,FGFR2,CTNNB1,TERT
GO: Biological Process	GO:2001237	negative regulation of extrinsic apoptotic signaling pathway	1.56e-05	0.0605	9.1e-05	0.000805	5	BRCA1,AKT1,BCL2,TNF,TERT
GO: Biological Process	GO:0010594	regulation of endothelial cell migration	2e-05	0.0778	0.000114	0.00101	5	TGFB1,MET,SPARC,AKT1,PTGS2
GO: Biological Process	GO:0071887	leukocyte apoptotic process	2.08e-05	0.081	0.000118	0.00105	5	MYC,CDKN2A,CD44,AKT1,PTEN
GO: Biological Process	GO:0034332	adherens junction organization	2.17e-05	0.0843	0.000123	0.00109	5	BCL2,CTNNB1,PTEN,MMP14,CDH1
GO: Biological Process	GO:0001704	formation of primary germ layer	2.35e-05	0.0912	0.00013	0.00115	5	FGFR2,MMP2,CTNNB1,MMP9,MMP14
GO: Biological Process	GO:0034250	positive regulation of cellular amide metabolic process	2.54e-05	0.0986	0.00014	0.00124	5	TGFB1,ERBB2,CYR61,ESR1,TNF
GO: Biological Process	GO:0016202	regulation of striated muscle tissue development	2.54e-05	0.0986	0.00014	0.00124	5	TGFB1,BCL2,FGFR2,CTNNB1,PTEN
GO: Biological Process	GO:0048634	regulation of muscle organ development	2.74e-05	0.106	0.00015	0.00132	5	TGFB1,BCL2,FGFR2,CTNNB1,PTEN
GO: Biological Process	GO:0043280	positive regulation of cysteine-type endopeptidase activity involved in apoptotic process	2.85e-05	0.111	0.000155	0.00137	5	MYC,CDKN1B,CDKN2A,CYR61,TNF
GO: Biological Process	GO:1901861	regulation of muscle tissue development	2.85e-05	0.111	0.000155	0.00137	5	TGFB1,BCL2,FGFR2,CTNNB1,PTEN
GO: Biological Process	GO:0031638	zymogen activation	2.95e-05	0.115	0.000159	0.00141	5	MYC,CDKN1B,CDKN2A,TNF,MMP14
GO: Biological Process	GO:0042476	odontogenesis	2.95e-05	0.115	0.000159	0.00141	5	TGFB1,APC,FGFR2,CTNNB1,SDC1
GO: Biological Process	GO:0042177	negative regulation of protein catabolic process	3.18e-05	0.124	0.00017	0.0015	5	CDKN2A,EGFR,TIMP1,TIMP3,APC
GO: Biological Process	GO:0051896	regulation of protein kinase B signaling	3.67e-05	0.143	0.000192	0.0017	5	TGFB1,IGF2,EGFR,TNF,PTEN
GO: Biological Process	GO:2001056	positive regulation of cysteine-type endopeptidase activity	4.08e-05	0.159	0.000211	0.00187	5	MYC,CDKN1B,CDKN2A,CYR61,TNF
GO: Biological Process	GO:0030856	regulation of epithelial cell differentiation	4.37e-05	0.17	0.000226	0.002	5	APC,BCL2,TNF,CTNNB1,EZH2
GO: Biological Process	GO:0035270	endocrine system development	4.84e-05	0.188	0.000247	0.00218	5	BRAF,WT1,AKT1,CDH1,CDK6
GO: Biological Process	GO:0031056	regulation of histone modification	5.17e-05	0.201	0.000262	0.00232	5	TGFB1,BRCA1,CTNNB1,TERT,DNMT1
GO: Biological Process	GO:0034614	cellular response to reactive oxygen species	5.89e-05	0.229	0.000295	0.00261	5	CDKN2A,MET,TNF,MDM2,EZH2
GO: Biological Process	GO:0014066	regulation of phosphatidylinositol 3-kinase signaling	6.08e-05	0.236	0.000304	0.00269	5	ERBB2,EGFR,AKT1,FGFR2,PTEN
GO: Biological Process	GO:0071248	cellular response to metal ion	6.27e-05	0.244	0.000313	0.00277	5	CDKN1B,BRAF,CTNNB1,CDH1,DNMT1
GO: Biological Process	GO:0010950	positive regulation of endopeptidase activity	6.47e-05	0.251	0.00032	0.00283	5	MYC,CDKN1B,CDKN2A,CYR61,TNF
GO: Biological Process	GO:0050806	positive regulation of synaptic transmission	6.67e-05	0.259	0.000329	0.00291	5	BRAF,EGFR,TNF,PTEN,PTGS2
GO: Biological Process	GO:0022408	negative regulation of cell-cell adhesion	7.54e-05	0.293	0.000368	0.00325	5	TGFB1,CDKN2A,ERBB2,CD44,CDH1
GO: Biological Process	GO:0010212	response to ionizing radiation	7.54e-05	0.293	0.000368	0.00325	5	MYC,BRCA1,BCL2,MSH2,DNMT1
GO: Biological Process	GO:1990267	response to transition metal nanoparticle	7.54e-05	0.293	0.000368	0.00325	5	CCNE1,BCL2,PTEN,MDM2,PTGS2
GO: Biological Process	GO:0043524	negative regulation of neuron apoptotic process	8.01e-05	0.311	0.000387	0.00342	5	KRAS,BRAF,BCL2,MSH2,TERT
GO: Biological Process	GO:0045619	regulation of lymphocyte differentiation	8.75e-05	0.34	0.000416	0.00367	5	TGFB1,CDKN2A,ERBB2,CD44,MMP14
GO: Biological Process	GO:0007093	mitotic cell cycle checkpoint	8.75e-05	0.34	0.000416	0.00367	5	TGFB1,CDKN1B,APC,MSH2,MDM2
GO: Biological Process	GO:0043409	negative regulation of MAPK cascade	9.81e-05	0.381	0.000461	0.00408	5	MYC,TIMP3,APC,AKT1,PTEN
GO: Biological Process	GO:1901796	regulation of signal transduction by p53 class mediator	0.000101	0.392	0.000473	0.00418	5	CDKN2A,BRCA1,CD44,AKT1,MDM2
GO: Biological Process	GO:0014065	phosphatidylinositol 3-kinase signaling	0.000101	0.392	0.000473	0.00418	5	ERBB2,EGFR,AKT1,FGFR2,PTEN
GO: Biological Process	GO:1902275	regulation of chromatin organization	0.000104	0.403	0.000484	0.00428	5	TGFB1,BRCA1,CTNNB1,TERT,DNMT1
GO: Biological Process	GO:0072089	stem cell proliferation	0.000104	0.403	0.000484	0.00428	5	TGFB1,MYC,FGFR2,CTNNB1,TERT
GO: Biological Process	GO:0048167	regulation of synaptic plasticity	0.000107	0.415	0.000495	0.00438	5	KRAS,BRAF,MMP9,PTEN,PTGS2
GO: Biological Process	GO:0030307	positive regulation of cell growth	0.00011	0.427	0.000508	0.0045	5	ERBB2,EGFR,AKT1,BCL2,MMP14
GO: Biological Process	GO:0032886	regulation of microtubule-based process	0.000113	0.438	0.000518	0.00458	5	CDKN1B,ERBB2,BRCA1,APC,CTNNB1
GO: Biological Process	GO:0050880	regulation of blood vessel size	0.000126	0.489	0.000564	0.00499	5	EGFR,ESR2,AKT1,MMP2,PTGS2
GO: Biological Process	GO:0021543	pallium development	0.000126	0.489	0.000564	0.00499	5	EGFR,CTNNB1,PTEN,EZH2,CDK6
GO: Biological Process	GO:0048469	cell maturation	0.000129	0.502	0.000576	0.00509	5	ESR2,BCL2,CTNNB1,RUNX3,PGR
GO: Biological Process	GO:0071241	cellular response to inorganic substance	0.000129	0.502	0.000576	0.00509	5	CDKN1B,BRAF,CTNNB1,CDH1,DNMT1
GO: Biological Process	GO:0035150	regulation of tube size	0.000129	0.502	0.000576	0.00509	5	EGFR,ESR2,AKT1,MMP2,PTGS2
GO: Biological Process	GO:0007219	Notch signaling pathway	0.000133	0.516	0.000589	0.00521	5	TGFB1,MYC,CDKN1B,MMP14,CDK6
GO: Biological Process	GO:0098727	maintenance of cell number	0.000133	0.516	0.000589	0.00521	5	CDKN2A,BRAF,APC,CTNNB1,EZH2
GO: Biological Process	GO:0010770	positive regulation of cell morphogenesis involved in differentiation	0.000155	0.603	0.000677	0.00599	5	TGFB1,MET,BRAF,CTNNB1,EZH2
GO: Biological Process	GO:0014031	mesenchymal cell development	0.000167	0.65	0.000717	0.00634	5	TGFB1,BCL2,FGFR2,CTNNB1,EZH2
GO: Biological Process	GO:1903036	positive regulation of response to wounding	0.000176	0.683	0.000743	0.00657	5	MYC,BRAF,EGFR,TNF,PTGS2
GO: Biological Process	GO:0007519	skeletal muscle tissue development	0.000176	0.683	0.000743	0.00657	5	TGFB1,MYC,MET,BCL2,CTNNB1
GO: Biological Process	GO:0048864	stem cell development	0.000194	0.754	0.000816	0.00721	5	TGFB1,BCL2,FGFR2,CTNNB1,EZH2
GO: Biological Process	GO:0007369	gastrulation	0.000194	0.754	0.000816	0.00721	5	FGFR2,MMP2,CTNNB1,MMP9,MMP14
GO: Biological Process	GO:0060348	bone development	0.000199	0.772	0.000834	0.00737	5	TGFB1,SPARC,ESR1,FGFR2,MMP14
GO: Biological Process	GO:0043393	regulation of protein binding	0.000204	0.791	0.00085	0.00752	5	MYC,CDKN2A,BCL2,MMP9,TERT
GO: Biological Process	GO:0006109	regulation of carbohydrate metabolic process	0.000219	0.849	0.000901	0.00797	5	TGFB1,MYC,IGF2,IGFBP3,AKT1
GO: Biological Process	GO:0048762	mesenchymal cell differentiation	0.000234	0.911	0.000964	0.00852	5	TGFB1,BCL2,FGFR2,CTNNB1,EZH2
GO: Biological Process	GO:1901654	response to ketone	0.00024	0.932	0.000984	0.0087	5	TGFB1,CCNE1,ESR2,AKT1,DNMT1
GO: Biological Process	GO:0045637	regulation of myeloid cell differentiation	0.000263	1	0.00107	0.00941	5	MYC,APC,TNF,CTNNB1,CDK6
GO: Biological Process	GO:1903322	positive regulation of protein modification by small protein conjugation or removal	0.000269	1	0.00108	0.00957	5	CDKN2A,BRCA1,RASSF1,PTEN,SKP2
GO: Biological Process	GO:0048015	phosphatidylinositol-mediated signaling	0.000287	1	0.00114	0.0101	5	ERBB2,EGFR,AKT1,FGFR2,PTEN
GO: Biological Process	GO:0048839	inner ear development	0.000294	1	0.00117	0.0103	5	TGFB1,CDKN1B,SPARC,FGFR2,CDH1
GO: Biological Process	GO:0048017	inositol lipid-mediated signaling	0.000307	1	0.00122	0.0107	5	ERBB2,EGFR,AKT1,FGFR2,PTEN
GO: Biological Process	GO:0034284	response to monosaccharide	0.000342	1	0.00133	0.0118	5	TGFB1,CDKN1B,SPARC,PTEN,PTGS2
GO: Biological Process	GO:0006006	glucose metabolic process	0.000437	1	0.00164	0.0145	5	MYC,IGF2,IGFBP3,AKT1,TNF
GO: Biological Process	GO:0006352	DNA-templated transcription, initiation	0.000473	1	0.00175	0.0155	5	MYC,ESR1,ESR2,CTNNB1,PGR
GO: Biological Process	GO:0001894	tissue homeostasis	0.000521	1	0.0019	0.0168	5	KRAS,EGFR,SPP1,BCL2,CTNNB1
GO: Biological Process	GO:1903039	positive regulation of leukocyte cell-cell adhesion	0.000541	1	0.00196	0.0174	5	TGFB1,IGF2,CD44,AKT1,TNF
GO: Biological Process	GO:0046777	protein autophosphorylation	0.000594	1	0.00214	0.0189	5	MET,ERBB2,EGFR,AKT1,FGFR2
GO: Biological Process	GO:0006469	negative regulation of protein kinase activity	0.000639	1	0.00229	0.0202	5	CDKN1B,CDKN2A,APC,AKT1,PTEN
GO: Biological Process	GO:0003007	heart morphogenesis	0.000675	1	0.00238	0.0211	5	TGFB1,CYR61,FGFR2,CTNNB1,MDM2
GO: Biological Process	GO:0030258	lipid modification	0.000712	1	0.00249	0.022	5	ERBB2,EGFR,AKT1,FGFR2,PTEN
GO: Biological Process	GO:0016458	gene silencing	0.000724	1	0.00253	0.0223	5	TGFB1,EGFR,ESR1,TERT,DNMT1
GO: Biological Process	GO:0042113	B cell activation	0.000737	1	0.00257	0.0227	5	TGFB1,CDKN2A,BCL2,MSH2,MMP14
GO: Biological Process	GO:0050808	synapse organization	0.00075	1	0.00261	0.023	5	ERBB2,FGFR2,CTNNB1,PTEN,CDH1
GO: Biological Process	GO:0021537	telencephalon development	0.000777	1	0.00269	0.0238	5	EGFR,CTNNB1,PTEN,EZH2,CDK6
GO: Biological Process	GO:0007281	germ cell development	0.000846	1	0.00289	0.0256	5	WT1,AKT1,BCL2,MSH2,CTNNB1
GO: Biological Process	GO:0019318	hexose metabolic process	0.000875	1	0.00296	0.0262	5	MYC,IGF2,IGFBP3,AKT1,TNF
GO: Biological Process	GO:1903050	regulation of proteolysis involved in cellular protein catabolic process	0.000875	1	0.00296	0.0262	5	CDKN2A,APC,AKT1,PTEN,MDM2
GO: Biological Process	GO:0031396	regulation of protein ubiquitination	0.000875	1	0.00296	0.0262	5	CDKN2A,BRCA1,RASSF1,PTEN,SKP2
GO: Biological Process	GO:0050803	regulation of synapse structure or activity	0.000951	1	0.00318	0.0281	5	KRAS,BRAF,MMP9,PTEN,PTGS2
GO: Biological Process	GO:0033673	negative regulation of kinase activity	0.000998	1	0.00333	0.0294	5	CDKN1B,CDKN2A,APC,AKT1,PTEN
GO: Biological Process	GO:0022409	positive regulation of cell-cell adhesion	0.00101	1	0.00336	0.0297	5	TGFB1,IGF2,CD44,AKT1,TNF
GO: Biological Process	GO:1903362	regulation of cellular protein catabolic process	0.00121	1	0.0039	0.0345	5	CDKN2A,APC,AKT1,PTEN,MDM2
GO: Biological Process	GO:0051251	positive regulation of lymphocyte activation	0.00172	1	0.00529	0.0468	5	TGFB1,IGF2,AKT1,BCL2,MMP14
GO: Biological Process	GO:0005996	monosaccharide metabolic process	0.00177	1	0.00543	0.048	5	MYC,IGF2,IGFBP3,AKT1,TNF
GO: Biological Process	GO:0044262	cellular carbohydrate metabolic process	0.00195	1	0.00591	0.0523	5	MYC,IGF2,IGFBP3,AKT1,PTEN
GO: Biological Process	GO:0007265	Ras protein signal transduction	0.00232	1	0.00686	0.0607	5	CDKN2A,KRAS,ERBB2,RASSF1,DNMT1
GO: Biological Process	GO:0002696	positive regulation of leukocyte activation	0.00257	1	0.00749	0.0663	5	TGFB1,IGF2,AKT1,BCL2,MMP14
GO: Biological Process	GO:0050727	regulation of inflammatory response	0.00257	1	0.00749	0.0663	5	EGFR,ESR1,CD44,TNF,PTGS2
GO: Biological Process	GO:0050867	positive regulation of cell activation	0.00302	1	0.00838	0.0741	5	TGFB1,IGF2,AKT1,BCL2,MMP14
GO: Biological Process	GO:0010959	regulation of metal ion transport	0.00381	1	0.0102	0.0903	5	TGFB1,AKT1,BCL2,CTNNB1,PTGS2
GO: Biological Process	GO:0045088	regulation of innate immune response	0.00386	1	0.0103	0.0911	5	KRAS,IGF2,ESR1,TNF,MMP2
GO: Biological Process	GO:0051348	negative regulation of transferase activity	0.00399	1	0.0106	0.0941	5	CDKN1B,CDKN2A,APC,AKT1,PTEN
GO: Biological Process	GO:0046486	glycerolipid metabolic process	0.00544	1	0.0137	0.121	5	ERBB2,EGFR,ESR1,FGFR2,PTEN
GO: Biological Process	GO:0001819	positive regulation of cytokine production	0.00608	1	0.0148	0.13	5	TGFB1,BRCA1,TNF,CTNNB1,PTGS2
GO: Biological Process	GO:0006644	phospholipid metabolic process	0.00652	1	0.0156	0.138	5	TGFB1,ERBB2,EGFR,FGFR2,PTEN
GO: Biological Process	GO:0002757	immune response-activating signal transduction	0.00958	1	0.0211	0.187	5	KRAS,ESR1,BCL2,TNF,PTEN
GO: Biological Process	GO:0034762	regulation of transmembrane transport	0.0101	1	0.022	0.195	5	TGFB1,AKT1,BCL2,CTNNB1,MMP9
GO: Biological Process	GO:0002764	immune response-regulating signaling pathway	0.0128	1	0.0264	0.234	5	KRAS,ESR1,BCL2,TNF,PTEN
GO: Biological Process	GO:0060627	regulation of vesicle-mediated transport	0.0134	1	0.0274	0.242	5	TGFB1,BRAF,TNF,PTEN,SDC1
GO: Biological Process	GO:0002253	activation of immune response	0.0153	1	0.0298	0.264	5	KRAS,ESR1,BCL2,TNF,PTEN
GO: Biological Process	GO:0051259	protein oligomerization	0.0169	1	0.0316	0.28	5	BRAF,MMP1,CTNNB1,MMP9,CDH1
GO: Biological Process	GO:0007264	small GTPase mediated signal transduction	0.0237	1	0.0415	0.367	5	CDKN2A,KRAS,ERBB2,RASSF1,DNMT1
GO: Biological Process	GO:0006914	autophagy	0.024	1	0.042	0.371	5	CDKN2A,MET,KIAA1324,AKT1,BCL2
GO: Biological Process	GO:0030036	actin cytoskeleton organization	0.0242	1	0.0422	0.373	5	TGFB1,KRAS,BRAF,BCL2,TNF
GO: Biological Process	GO:0055065	metal ion homeostasis	0.0245	1	0.0426	0.377	5	TGFB1,MYC,EGFR,ESR1,BCL2
GO: Cellular Component	GO:0034774	secretory granule lumen	3.45e-06	0.00103	0.000206	0.00129	5	TGFB1,SPARC,IGF2,TIMP1,TIMP3
GO: Cellular Component	GO:0060205	cytoplasmic vesicle lumen	9.31e-06	0.00277	0.000277	0.00174	5	TGFB1,SPARC,IGF2,TIMP1,TIMP3
GO: Cellular Component	GO:0043209	myelin sheath	0.000221	0.0657	0.00206	0.0129	5	ERBB2,NDRG1,BCL2,PTEN,CDH1
GO: Cellular Component	GO:0005911	cell-cell junction	0.00552	1	0.0194	0.122	5	NDRG1,APC,AKT1,CTNNB1,CDH1
GO: Cellular Component	GO:0098794	postsynapse	0.00743	1	0.0241	0.151	5	MET,ERBB2,AKT1,PTEN,PGR
GO: Molecular Function	GO:0004714	transmembrane receptor protein tyrosine kinase activity	3.61e-05	0.0138	0.000625	0.00408	4	MET,ERBB2,EGFR,FGFR2
GO: Molecular Function	GO:0042562	hormone binding	8.37e-05	0.0319	0.00123	0.008	4	EGFR,ESR1,ESR2,PGR
GO: Molecular Function	GO:0008013	beta-catenin binding	0.00011	0.0419	0.0013	0.0085	4	MET,ESR1,APC,CDH1
GO: Molecular Function	GO:0035258	steroid hormone receptor binding	0.00011	0.0419	0.0013	0.0085	4	CCNE1,BRCA1,CTNNB1,DNMT1
GO: Molecular Function	GO:0019199	transmembrane receptor protein kinase activity	0.00012	0.0456	0.0013	0.0085	4	MET,ERBB2,EGFR,FGFR2
GO: Molecular Function	GO:0001046	core promoter sequence-specific DNA binding	0.000295	0.112	0.00255	0.0167	4	MYC,ESR1,ESR2,EZH2
GO: Molecular Function	GO:0035257	nuclear hormone receptor binding	0.00105	0.399	0.00614	0.04	4	CCNE1,BRCA1,CTNNB1,DNMT1
GO: Molecular Function	GO:0001047	core promoter binding	0.00112	0.427	0.00635	0.0414	4	MYC,ESR1,ESR2,EZH2
GO: Molecular Function	GO:0008083	growth factor activity	0.00117	0.447	0.00647	0.0422	4	TGFB1,IGF2,TIMP1,GDF15
GO: Molecular Function	GO:0004866	endopeptidase inhibitor activity	0.00131	0.498	0.00692	0.0452	4	PTTG1,SERPINB5,TIMP1,TIMP3
GO: Molecular Function	GO:0061135	endopeptidase regulator activity	0.00149	0.566	0.00775	0.0506	4	PTTG1,SERPINB5,TIMP1,TIMP3
GO: Molecular Function	GO:0030414	peptidase inhibitor activity	0.00158	0.602	0.00803	0.0523	4	PTTG1,SERPINB5,TIMP1,TIMP3
GO: Molecular Function	GO:0004713	protein tyrosine kinase activity	0.00165	0.627	0.00821	0.0536	4	MET,ERBB2,EGFR,FGFR2
GO: Molecular Function	GO:0051427	hormone receptor binding	0.00168	0.639	0.00821	0.0536	4	CCNE1,BRCA1,CTNNB1,DNMT1
GO: Molecular Function	GO:0005057	signal transducer activity, downstream of receptor	0.00178	0.679	0.00859	0.056	4	CDKN1B,ERBB2,BRAF,EGFR
GO: Molecular Function	GO:0008022	protein C-terminus binding	0.00349	1	0.0138	0.0902	4	ERBB2,MSH2,CTNNB1,SDC1
GO: Molecular Function	GO:0005126	cytokine receptor binding	0.00851	1	0.025	0.163	4	TGFB1,GDF15,CD44,TNF
GO: Molecular Function	GO:0003713	transcription coactivator activity	0.0108	1	0.0298	0.194	4	CCNE1,BRCA1,ESR2,CTNNB1
GO: Molecular Function	GO:0000978	RNA polymerase II proximal promoter sequence-specific DNA binding	0.0211	1	0.0484	0.316	4	MYC,ESR1,ESR2,PGR
GO: Biological Process	GO:0070920	regulation of production of small RNA involved in gene silencing by RNA	1.12e-08	4.35e-05	1.49e-07	1.31e-06	4	TGFB1,EGFR,ESR1,TERT
GO: Biological Process	GO:0060009	Sertoli cell development	2.53e-07	0.000984	2.39e-06	2.12e-05	4	ESR1,ESR2,WT1,SDC1
GO: Biological Process	GO:0051000	positive regulation of nitric-oxide synthase activity	3.81e-07	0.00148	3.42e-06	3.03e-05	4	KRAS,ESR1,AKT1,TERT
GO: Biological Process	GO:0046697	decidualization	5.51e-07	0.00214	4.77e-06	4.22e-05	4	SPP1,ESR1,CDH1,PTGS2
GO: Biological Process	GO:0060147	regulation of posttranscriptional gene silencing	7.72e-07	0.003	6.38e-06	5.64e-05	4	TGFB1,EGFR,ESR1,TERT
GO: Biological Process	GO:0060966	regulation of gene silencing by RNA	7.72e-07	0.003	6.38e-06	5.64e-05	4	TGFB1,EGFR,ESR1,TERT
GO: Biological Process	GO:0060008	Sertoli cell differentiation	9.04e-07	0.00351	7.35e-06	6.5e-05	4	ESR1,ESR2,WT1,SDC1
GO: Biological Process	GO:0060445	branching involved in salivary gland morphogenesis	1.05e-06	0.00409	8.4e-06	7.43e-05	4	MET,TNF,FGFR2,CDH1
GO: Biological Process	GO:2000772	regulation of cellular senescence	1.22e-06	0.00474	9.55e-06	8.44e-05	4	CDKN2A,KRAS,TERT,CDK6
GO: Biological Process	GO:0033032	regulation of myeloid cell apoptotic process	1.4e-06	0.00545	1.09e-05	9.62e-05	4	CDKN2A,CD44,BCL2,PTEN
GO: Biological Process	GO:0010226	response to lithium ion	1.4e-06	0.00545	1.09e-05	9.62e-05	4	CDKN1B,CTNNB1,CDH1,PTGS2
GO: Biological Process	GO:0045736	negative regulation of cyclin-dependent protein serine/threonine kinase activity	1.61e-06	0.00625	1.22e-05	0.000108	4	CDKN1B,CDKN2A,APC,PTEN
GO: Biological Process	GO:0031069	hair follicle morphogenesis	1.61e-06	0.00625	1.22e-05	0.000108	4	BCL2,FGFR2,CTNNB1,RUNX3
GO: Biological Process	GO:0031050	dsRNA fragmentation	1.83e-06	0.00713	1.37e-05	0.000121	4	TGFB1,EGFR,ESR1,TERT
GO: Biological Process	GO:0070918	production of small RNA involved in gene silencing by RNA	1.83e-06	0.00713	1.37e-05	0.000121	4	TGFB1,EGFR,ESR1,TERT
GO: Biological Process	GO:0010762	regulation of fibroblast migration	2.08e-06	0.00809	1.52e-05	0.000135	4	TGFB1,BRAF,AKT1,MMP1
GO: Biological Process	GO:0071392	cellular response to estradiol stimulus	2.08e-06	0.00809	1.52e-05	0.000135	4	EGFR,ESR1,ESR2,MMP2
GO: Biological Process	GO:1904030	negative regulation of cyclin-dependent protein kinase activity	2.65e-06	0.0103	1.89e-05	0.000167	4	CDKN1B,CDKN2A,APC,PTEN
GO: Biological Process	GO:0045742	positive regulation of epidermal growth factor receptor signaling pathway	2.65e-06	0.0103	1.89e-05	0.000167	4	ESR1,ESR2,AKT1,MMP9
GO: Biological Process	GO:0033028	myeloid cell apoptotic process	2.65e-06	0.0103	1.89e-05	0.000167	4	CDKN2A,CD44,BCL2,PTEN
GO: Biological Process	GO:1901186	positive regulation of ERBB signaling pathway	2.98e-06	0.0116	2.09e-05	0.000184	4	ESR1,ESR2,AKT1,MMP9
GO: Biological Process	GO:0060441	epithelial tube branching involved in lung morphogenesis	2.98e-06	0.0116	2.09e-05	0.000184	4	KRAS,TNF,FGFR2,CTNNB1
GO: Biological Process	GO:0048730	epidermis morphogenesis	2.98e-06	0.0116	2.09e-05	0.000184	4	BCL2,FGFR2,CTNNB1,RUNX3
GO: Biological Process	GO:0034405	response to fluid shear stress	3.33e-06	0.013	2.29e-05	0.000202	4	TGFB1,SPP1,AKT1,PTGS2
GO: Biological Process	GO:0031641	regulation of myelination	3.33e-06	0.013	2.29e-05	0.000202	4	AKT1,TNF,CTNNB1,PTEN
GO: Biological Process	GO:1901099	negative regulation of signal transduction in absence of ligand	3.72e-06	0.0145	2.52e-05	0.000223	4	AKT1,BCL2,TNF,TERT
GO: Biological Process	GO:2001240	negative regulation of extrinsic apoptotic signaling pathway in absence of ligand	3.72e-06	0.0145	2.52e-05	0.000223	4	AKT1,BCL2,TNF,TERT
GO: Biological Process	GO:0038128	ERBB2 signaling pathway	4.14e-06	0.0161	2.75e-05	0.000243	4	KRAS,ERBB2,EGFR,AKT1
GO: Biological Process	GO:0060603	mammary gland duct morphogenesis	5.07e-06	0.0197	3.29e-05	0.000291	4	TGFB1,ESR1,FGFR2,PGR
GO: Biological Process	GO:0048662	negative regulation of smooth muscle cell proliferation	5.07e-06	0.0197	3.29e-05	0.000291	4	CDKN1B,IGFBP3,ESR1,ESR2
GO: Biological Process	GO:0010761	fibroblast migration	6.75e-06	0.0262	4.25e-05	0.000376	4	TGFB1,BRAF,AKT1,MMP1
GO: Biological Process	GO:0035987	endodermal cell differentiation	7.4e-06	0.0287	4.64e-05	0.00041	4	MMP2,CTNNB1,MMP9,MMP14
GO: Biological Process	GO:0072132	mesenchyme morphogenesis	8.82e-06	0.0343	5.46e-05	0.000483	4	TGFB1,MYC,CTNNB1,MDM2
GO: Biological Process	GO:0071359	cellular response to dsRNA	1.04e-05	0.0405	6.31e-05	0.000558	4	TGFB1,EGFR,ESR1,TERT
GO: Biological Process	GO:0045839	negative regulation of mitotic nuclear division	1.04e-05	0.0405	6.31e-05	0.000558	4	PTTG1,ESR1,APC,FGFR2
GO: Biological Process	GO:0045840	positive regulation of mitotic nuclear division	1.13e-05	0.044	6.81e-05	0.000602	4	TGFB1,MET,IGF2,TNF
GO: Biological Process	GO:0048806	genitalia development	1.13e-05	0.044	6.81e-05	0.000602	4	ESR1,ESR2,WT1,CTNNB1
GO: Biological Process	GO:0030520	intracellular estrogen receptor signaling pathway	1.13e-05	0.044	6.81e-05	0.000602	4	BRCA1,ESR1,ESR2,SKP2
GO: Biological Process	GO:0000060	protein import into nucleus, translocation	1.43e-05	0.0556	8.44e-05	0.000747	4	TGFB1,BRCA1,AKT1,TNF
GO: Biological Process	GO:2001239	regulation of extrinsic apoptotic signaling pathway in absence of ligand	1.43e-05	0.0556	8.44e-05	0.000747	4	AKT1,BCL2,TNF,TERT
GO: Biological Process	GO:0010518	positive regulation of phospholipase activity	1.66e-05	0.0645	9.63e-05	0.000852	4	CYR61,EGFR,ESR1,FGFR2
GO: Biological Process	GO:0090398	cellular senescence	1.66e-05	0.0645	9.63e-05	0.000852	4	CDKN2A,KRAS,TERT,CDK6
GO: Biological Process	GO:0048538	thymus development	1.78e-05	0.0693	0.000103	0.00091	4	BRAF,APC,BCL2,CTNNB1
GO: Biological Process	GO:0001706	endoderm formation	1.78e-05	0.0693	0.000103	0.00091	4	MMP2,CTNNB1,MMP9,MMP14
GO: Biological Process	GO:0048546	digestive tract morphogenesis	1.91e-05	0.0743	0.00011	0.00097	4	EGFR,BCL2,FGFR2,CTNNB1
GO: Biological Process	GO:0016441	posttranscriptional gene silencing	2.2e-05	0.0853	0.000124	0.00109	4	TGFB1,EGFR,ESR1,TERT
GO: Biological Process	GO:0035194	posttranscriptional gene silencing by RNA	2.2e-05	0.0853	0.000124	0.00109	4	TGFB1,EGFR,ESR1,TERT
GO: Biological Process	GO:0003382	epithelial cell morphogenesis	2.2e-05	0.0853	0.000124	0.00109	4	MET,WT1,CTNNB1,CDH1
GO: Biological Process	GO:0090183	regulation of kidney development	2.2e-05	0.0853	0.000124	0.00109	4	TGFB1,MYC,WT1,CTNNB1
GO: Biological Process	GO:0051155	positive regulation of striated muscle cell differentiation	2.35e-05	0.0912	0.00013	0.00115	4	TGFB1,GDF15,BCL2,MMP14
GO: Biological Process	GO:1904888	cranial skeletal system development	2.51e-05	0.0974	0.000138	0.00122	4	TGFB1,FGFR2,CTNNB1,MMP14
GO: Biological Process	GO:0042130	negative regulation of T cell proliferation	3.03e-05	0.118	0.000163	0.00144	4	TGFB1,CDKN2A,ERBB2,CD44
GO: Biological Process	GO:0045844	positive regulation of striated muscle tissue development	3.03e-05	0.118	0.000163	0.00144	4	TGFB1,BCL2,FGFR2,CTNNB1
GO: Biological Process	GO:0048636	positive regulation of muscle organ development	3.03e-05	0.118	0.000163	0.00144	4	TGFB1,BCL2,FGFR2,CTNNB1
GO: Biological Process	GO:0030521	androgen receptor signaling pathway	3.23e-05	0.125	0.000172	0.00152	4	CCNE1,BRCA1,ESR2,CTNNB1
GO: Biological Process	GO:1901863	positive regulation of muscle tissue development	3.23e-05	0.125	0.000172	0.00152	4	TGFB1,BCL2,FGFR2,CTNNB1
GO: Biological Process	GO:0060425	lung morphogenesis	3.43e-05	0.133	0.000181	0.0016	4	KRAS,TNF,FGFR2,CTNNB1
GO: Biological Process	GO:0051785	positive regulation of nuclear division	3.43e-05	0.133	0.000181	0.0016	4	TGFB1,MET,IGF2,TNF
GO: Biological Process	GO:0010517	regulation of phospholipase activity	3.64e-05	0.141	0.00019	0.00168	4	CYR61,EGFR,ESR1,FGFR2
GO: Biological Process	GO:0060193	positive regulation of lipase activity	3.86e-05	0.15	0.000201	0.00178	4	CYR61,EGFR,ESR1,FGFR2
GO: Biological Process	GO:2001022	positive regulation of response to DNA damage stimulus	4.32e-05	0.168	0.000223	0.00198	4	MYC,CDKN2A,BRCA1,EGFR
GO: Biological Process	GO:2000648	positive regulation of stem cell proliferation	6.29e-05	0.244	0.000313	0.00277	4	MYC,FGFR2,CTNNB1,TERT
GO: Biological Process	GO:0032945	negative regulation of mononuclear cell proliferation	6.29e-05	0.244	0.000313	0.00277	4	TGFB1,CDKN2A,ERBB2,CD44
GO: Biological Process	GO:0050672	negative regulation of lymphocyte proliferation	6.29e-05	0.244	0.000313	0.00277	4	TGFB1,CDKN2A,ERBB2,CD44
GO: Biological Process	GO:0034103	regulation of tissue remodeling	6.62e-05	0.257	0.000326	0.00289	4	TGFB1,CDKN2A,EGFR,SPP1
GO: Biological Process	GO:0030279	negative regulation of ossification	6.62e-05	0.257	0.000326	0.00289	4	TGFB1,BCL2,TNF,CDK6
GO: Biological Process	GO:0002260	lymphocyte homeostasis	6.62e-05	0.257	0.000326	0.00289	4	TGFB1,CD44,AKT1,BCL2
GO: Biological Process	GO:0007422	peripheral nervous system development	7.31e-05	0.284	0.000358	0.00317	4	ERBB2,NDRG1,AKT1,RUNX3
GO: Biological Process	GO:0019229	regulation of vasoconstriction	7.67e-05	0.298	0.000372	0.00329	4	EGFR,AKT1,MMP2,PTGS2
GO: Biological Process	GO:0097194	execution phase of apoptosis	8.05e-05	0.313	0.000387	0.00342	4	CDKN2A,IGFBP3,APC,AKT1
GO: Biological Process	GO:0034333	adherens junction assembly	8.05e-05	0.313	0.000387	0.00342	4	BCL2,CTNNB1,PTEN,MMP14
GO: Biological Process	GO:0070664	negative regulation of leukocyte proliferation	8.05e-05	0.313	0.000387	0.00342	4	TGFB1,CDKN2A,ERBB2,CD44
GO: Biological Process	GO:0097192	extrinsic apoptotic signaling pathway in absence of ligand	8.44e-05	0.328	0.000403	0.00357	4	AKT1,BCL2,TNF,TERT
GO: Biological Process	GO:0071260	cellular response to mechanical stimulus	8.44e-05	0.328	0.000403	0.00357	4	IGF2,AKT1,CTNNB1,PTGS2
GO: Biological Process	GO:0038034	signal transduction in absence of ligand	8.44e-05	0.328	0.000403	0.00357	4	AKT1,BCL2,TNF,TERT
GO: Biological Process	GO:0060419	heart growth	8.84e-05	0.344	0.000419	0.00371	4	WT1,FGFR2,CTNNB1,PTEN
GO: Biological Process	GO:0043331	response to dsRNA	9.26e-05	0.36	0.000438	0.00387	4	TGFB1,EGFR,ESR1,TERT
GO: Biological Process	GO:0070227	lymphocyte apoptotic process	9.69e-05	0.377	0.000456	0.00404	4	MYC,CD44,AKT1,PTEN
GO: Biological Process	GO:0018107	peptidyl-threonine phosphorylation	0.000101	0.394	0.000473	0.00419	4	TGFB1,MET,AKT1,BCL2
GO: Biological Process	GO:0060191	regulation of lipase activity	0.000101	0.394	0.000473	0.00419	4	CYR61,EGFR,ESR1,FGFR2
GO: Biological Process	GO:0051897	positive regulation of protein kinase B signaling	0.000111	0.43	0.000511	0.00452	4	TGFB1,IGF2,EGFR,TNF
GO: Biological Process	GO:0045833	negative regulation of lipid metabolic process	0.000111	0.43	0.000511	0.00452	4	BRCA1,ESR1,AKT1,TNF
GO: Biological Process	GO:0070301	cellular response to hydrogen peroxide	0.000116	0.449	0.000524	0.00463	4	CDKN2A,MET,MDM2,EZH2
GO: Biological Process	GO:0018210	peptidyl-threonine modification	0.000121	0.469	0.000545	0.00482	4	TGFB1,MET,AKT1,BCL2
GO: Biological Process	GO:0031058	positive regulation of histone modification	0.000121	0.469	0.000545	0.00482	4	TGFB1,BRCA1,CTNNB1,DNMT1
GO: Biological Process	GO:0001656	metanephros development	0.000126	0.489	0.000564	0.00499	4	MYC,WT1,BCL2,CTNNB1
GO: Biological Process	GO:0006919	activation of cysteine-type endopeptidase activity involved in apoptotic process	0.000131	0.51	0.000585	0.00517	4	MYC,CDKN1B,CDKN2A,TNF
GO: Biological Process	GO:0048709	oligodendrocyte differentiation	0.000137	0.532	0.000606	0.00536	4	TGFB1,ERBB2,CTNNB1,PTEN
GO: Biological Process	GO:0046849	bone remodeling	0.000137	0.532	0.000606	0.00536	4	TGFB1,EGFR,SPP1,CTNNB1
GO: Biological Process	GO:0043154	negative regulation of cysteine-type endopeptidase activity involved in apoptotic process	0.000149	0.577	0.000653	0.00578	4	CD44,AKT1,MMP9,MDM2
GO: Biological Process	GO:2001243	negative regulation of intrinsic apoptotic signaling pathway	0.000155	0.601	0.000676	0.00597	4	CD44,AKT1,BCL2,MMP9
GO: Biological Process	GO:0001892	embryonic placenta development	0.000167	0.65	0.000717	0.00634	4	CYR61,EGFR,AKT1,FGFR2
GO: Biological Process	GO:2000117	negative regulation of cysteine-type endopeptidase activity	0.000167	0.65	0.000717	0.00634	4	CD44,AKT1,MMP9,MDM2
GO: Biological Process	GO:0001776	leukocyte homeostasis	0.000174	0.676	0.00074	0.00654	4	TGFB1,CD44,AKT1,BCL2
GO: Biological Process	GO:0097202	activation of cysteine-type endopeptidase activity	0.000174	0.676	0.00074	0.00654	4	MYC,CDKN1B,CDKN2A,TNF
GO: Biological Process	GO:2000106	regulation of leukocyte apoptotic process	0.000174	0.676	0.00074	0.00654	4	MYC,CDKN2A,CD44,PTEN
GO: Biological Process	GO:0050868	negative regulation of T cell activation	0.000181	0.702	0.000763	0.00675	4	TGFB1,CDKN2A,ERBB2,CD44
GO: Biological Process	GO:0042310	vasoconstriction	0.000188	0.729	0.000792	0.007	4	EGFR,AKT1,MMP2,PTGS2
GO: Biological Process	GO:0045727	positive regulation of translation	0.000218	0.845	0.0009	0.00796	4	TGFB1,ERBB2,ESR1,TNF
GO: Biological Process	GO:0051101	regulation of DNA binding	0.000242	0.941	0.00099	0.00876	4	TGFB1,MYC,CTNNB1,MMP9
GO: Biological Process	GO:0051591	response to cAMP	0.000242	0.941	0.00099	0.00876	4	SPARC,BRAF,WT1,SDC1
GO: Biological Process	GO:0034968	histone lysine methylation	0.000242	0.941	0.00099	0.00876	4	BRCA1,CTNNB1,EZH2,DNMT1
GO: Biological Process	GO:1903038	negative regulation of leukocyte cell-cell adhesion	0.000251	0.974	0.00102	0.00902	4	TGFB1,CDKN2A,ERBB2,CD44
GO: Biological Process	GO:0010811	positive regulation of cell-substrate adhesion	0.00026	1	0.00105	0.00931	4	BRAF,CYR61,SPP1,CDK6
GO: Biological Process	GO:0014013	regulation of gliogenesis	0.000269	1	0.00108	0.00957	4	MYC,CTNNB1,EZH2,TERT
GO: Biological Process	GO:1903524	positive regulation of blood circulation	0.000288	1	0.00114	0.0101	4	EGFR,ESR2,AKT1,PTGS2
GO: Biological Process	GO:2001251	negative regulation of chromosome organization	0.000317	1	0.00125	0.0111	4	PTTG1,BRCA1,APC,DNMT1
GO: Biological Process	GO:0034111	negative regulation of homotypic cell-cell adhesion	0.000317	1	0.00125	0.0111	4	TGFB1,CDKN2A,ERBB2,CD44
GO: Biological Process	GO:0001837	epithelial to mesenchymal transition	0.000317	1	0.00125	0.0111	4	TGFB1,FGFR2,CTNNB1,EZH2
GO: Biological Process	GO:0018022	peptidyl-lysine methylation	0.000339	1	0.00132	0.0117	4	BRCA1,CTNNB1,EZH2,DNMT1
GO: Biological Process	GO:0003206	cardiac chamber morphogenesis	0.000361	1	0.0014	0.0124	4	CYR61,FGFR2,CTNNB1,MDM2
GO: Biological Process	GO:0045598	regulation of fat cell differentiation	0.000372	1	0.00144	0.0127	4	TGFB1,AKT1,TNF,PTGS2
GO: Biological Process	GO:0014902	myotube differentiation	0.000384	1	0.00148	0.0131	4	MET,GDF15,BCL2,MMP14
GO: Biological Process	GO:0002761	regulation of myeloid leukocyte differentiation	0.000396	1	0.00151	0.0134	4	MYC,APC,TNF,CTNNB1
GO: Biological Process	GO:0051592	response to calcium ion	0.000421	1	0.00159	0.014	4	SPARC,BRAF,EGFR,SDC1
GO: Biological Process	GO:0003231	cardiac ventricle development	0.000434	1	0.00163	0.0144	4	CYR61,FGFR2,CTNNB1,MDM2
GO: Biological Process	GO:0007292	female gamete generation	0.000447	1	0.00168	0.0148	4	BCL2,CTNNB1,PTGS2,PGR
GO: Biological Process	GO:0008637	apoptotic mitochondrial changes	0.00046	1	0.00171	0.0151	4	CDKN2A,AKT1,BCL2,MMP9
GO: Biological Process	GO:0050864	regulation of B cell activation	0.000516	1	0.00188	0.0166	4	TGFB1,CDKN2A,BCL2,MMP14
GO: Biological Process	GO:0045766	positive regulation of angiogenesis	0.000516	1	0.00188	0.0166	4	BRCA1,MMP9,TERT,PTGS2
GO: Biological Process	GO:0045580	regulation of T cell differentiation	0.000531	1	0.00193	0.0171	4	TGFB1,CDKN2A,ERBB2,CD44
GO: Biological Process	GO:0051250	negative regulation of lymphocyte activation	0.000561	1	0.00203	0.0179	4	TGFB1,CDKN2A,ERBB2,CD44
GO: Biological Process	GO:0071901	negative regulation of protein serine/threonine kinase activity	0.000561	1	0.00203	0.0179	4	CDKN1B,CDKN2A,APC,PTEN
GO: Biological Process	GO:0016571	histone methylation	0.000561	1	0.00203	0.0179	4	BRCA1,CTNNB1,EZH2,DNMT1
GO: Biological Process	GO:0046631	alpha-beta T cell activation	0.000561	1	0.00203	0.0179	4	TGFB1,BRAF,CD44,BCL2
GO: Biological Process	GO:0016925	protein sumoylation	0.000626	1	0.00225	0.0199	4	CDKN2A,BRCA1,CTNNB1,MDM2
GO: Biological Process	GO:0097479	synaptic vesicle localization	0.000643	1	0.0023	0.0203	4	BRAF,FGFR2,CTNNB1,PTEN
GO: Biological Process	GO:0031214	biomineral tissue development	0.00066	1	0.00233	0.0206	4	TGFB1,SPP1,FGFR2,PTGS2
GO: Biological Process	GO:0070507	regulation of microtubule cytoskeleton organization	0.000678	1	0.00239	0.0212	4	CDKN1B,BRCA1,APC,CTNNB1
GO: Biological Process	GO:0035051	cardiocyte differentiation	0.000714	1	0.0025	0.0221	4	TGFB1,MET,WT1,CTNNB1
GO: Biological Process	GO:0017148	negative regulation of translation	0.000714	1	0.0025	0.0221	4	TGFB1,EGFR,ESR1,WT1
GO: Biological Process	GO:1904018	positive regulation of vasculature development	0.000791	1	0.00271	0.024	4	BRCA1,MMP9,TERT,PTGS2
GO: Biological Process	GO:0051099	positive regulation of binding	0.000852	1	0.00291	0.0257	4	TGFB1,MYC,MMP9,TERT
GO: Biological Process	GO:0002065	columnar/cuboidal epithelial cell differentiation	0.000873	1	0.00296	0.0262	4	BCL2,FGFR2,CDH1,CDK6
GO: Biological Process	GO:0000077	DNA damage checkpoint	0.000894	1	0.00301	0.0266	4	CDKN1B,BRCA1,MSH2,MDM2
GO: Biological Process	GO:0007270	neuron-neuron synaptic transmission	0.000894	1	0.00301	0.0266	4	KRAS,EGFR,PTEN,PTGS2
GO: Biological Process	GO:0034249	negative regulation of cellular amide metabolic process	0.000894	1	0.00301	0.0266	4	TGFB1,EGFR,ESR1,WT1
GO: Biological Process	GO:2001252	positive regulation of chromosome organization	0.000938	1	0.00315	0.0278	4	TGFB1,BRCA1,CTNNB1,DNMT1
GO: Biological Process	GO:0002695	negative regulation of leukocyte activation	0.00101	1	0.00335	0.0296	4	TGFB1,CDKN2A,ERBB2,CD44
GO: Biological Process	GO:0031047	gene silencing by RNA	0.00101	1	0.00335	0.0296	4	TGFB1,EGFR,ESR1,TERT
GO: Biological Process	GO:0001764	neuron migration	0.00103	1	0.0034	0.0301	4	MET,ESR2,CTNNB1,CDH1
GO: Biological Process	GO:2001242	regulation of intrinsic apoptotic signaling pathway	0.00103	1	0.0034	0.0301	4	CD44,AKT1,BCL2,MMP9
GO: Biological Process	GO:0006338	chromatin remodeling	0.00113	1	0.00369	0.0326	4	MYC,CDKN2A,ESR1,CTNNB1
GO: Biological Process	GO:0031570	DNA integrity checkpoint	0.00113	1	0.00369	0.0326	4	CDKN1B,BRCA1,MSH2,MDM2
GO: Biological Process	GO:1902115	regulation of organelle assembly	0.00116	1	0.00375	0.0332	4	BRCA1,KIAA1324,TNF,SDC1
GO: Biological Process	GO:0030203	glycosaminoglycan metabolic process	0.00121	1	0.0039	0.0345	4	TGFB1,CD44,AKT1,SDC1
GO: Biological Process	GO:0001889	liver development	0.00126	1	0.00404	0.0358	4	CCNE1,MET,CTNNB1,EZH2
GO: Biological Process	GO:0030902	hindbrain development	0.00129	1	0.00411	0.0363	4	ESR2,BCL2,CTNNB1,EZH2
GO: Biological Process	GO:0061008	hepaticobiliary system development	0.00135	1	0.00427	0.0377	4	CCNE1,MET,CTNNB1,EZH2
GO: Biological Process	GO:0006275	regulation of DNA replication	0.00135	1	0.00427	0.0377	4	TGFB1,MET,EGFR,CTNNB1
GO: Biological Process	GO:0003205	cardiac chamber development	0.00135	1	0.00427	0.0377	4	CYR61,FGFR2,CTNNB1,MDM2
GO: Biological Process	GO:0006479	protein methylation	0.00141	1	0.00443	0.0391	4	BRCA1,CTNNB1,EZH2,DNMT1
GO: Biological Process	GO:0008213	protein alkylation	0.00141	1	0.00443	0.0391	4	BRCA1,CTNNB1,EZH2,DNMT1
GO: Biological Process	GO:0019827	stem cell population maintenance	0.00141	1	0.00443	0.0391	4	CDKN2A,BRAF,APC,CTNNB1
GO: Biological Process	GO:0002244	hematopoietic progenitor cell differentiation	0.00144	1	0.00451	0.0399	4	TGFB1,BRAF,BCL2,CDK6
GO: Biological Process	GO:0006022	aminoglycan metabolic process	0.00147	1	0.0046	0.0407	4	TGFB1,CD44,AKT1,SDC1
GO: Biological Process	GO:0050866	negative regulation of cell activation	0.00156	1	0.00486	0.043	4	TGFB1,CDKN2A,ERBB2,CD44
GO: Biological Process	GO:0031669	cellular response to nutrient levels	0.00159	1	0.00495	0.0438	4	CCNE1,KIAA1324,BCL2,MDM2
GO: Biological Process	GO:0048639	positive regulation of developmental growth	0.00166	1	0.00516	0.0456	4	IGF2,WT1,BCL2,FGFR2
GO: Biological Process	GO:0010675	regulation of cellular carbohydrate metabolic process	0.00183	1	0.00561	0.0496	4	MYC,IGF2,IGFBP3,AKT1
GO: Biological Process	GO:0050954	sensory perception of mechanical stimulus	0.00187	1	0.00568	0.0502	4	MYC,CDKN1B,TNF,CDH1
GO: Biological Process	GO:0010565	regulation of cellular ketone metabolic process	0.00187	1	0.00568	0.0502	4	BRCA1,APC,AKT1,PTGS2
GO: Biological Process	GO:0031398	positive regulation of protein ubiquitination	0.0019	1	0.00578	0.0511	4	BRCA1,RASSF1,PTEN,SKP2
GO: Biological Process	GO:0046488	phosphatidylinositol metabolic process	0.00242	1	0.00713	0.063	4	ERBB2,EGFR,FGFR2,PTEN
GO: Biological Process	GO:0042787	protein ubiquitination involved in ubiquitin-dependent protein catabolic process	0.00269	1	0.00783	0.0692	4	CDKN2A,PTTG1,PTEN,MDM2
GO: Biological Process	GO:0009746	response to hexose	0.00274	1	0.00787	0.0696	4	TGFB1,CDKN1B,PTEN,PTGS2
GO: Biological Process	GO:0071897	DNA biosynthetic process	0.00283	1	0.00793	0.0702	4	MYC,BRCA1,CTNNB1,TERT
GO: Biological Process	GO:0032872	regulation of stress-activated MAPK cascade	0.0034	1	0.0093	0.0823	4	MYC,MET,AKT1,TNF
GO: Biological Process	GO:0070302	regulation of stress-activated protein kinase signaling cascade	0.00346	1	0.00944	0.0835	4	MYC,MET,AKT1,TNF
GO: Biological Process	GO:0045444	fat cell differentiation	0.00357	1	0.00969	0.0857	4	TGFB1,AKT1,TNF,PTGS2
GO: Biological Process	GO:0072659	protein localization to plasma membrane	0.00357	1	0.00969	0.0857	4	TGFB1,AKT1,TNF,CDH1
GO: Biological Process	GO:0010821	regulation of mitochondrion organization	0.00357	1	0.00969	0.0857	4	CDKN2A,AKT1,BCL2,MMP9
GO: Biological Process	GO:1990778	protein localization to cell periphery	0.00368	1	0.00992	0.0877	4	TGFB1,AKT1,TNF,CDH1
GO: Biological Process	GO:0071559	response to transforming growth factor beta	0.00404	1	0.0108	0.0952	4	TGFB1,GDF15,RUNX3,DNMT1
GO: Biological Process	GO:0034112	positive regulation of homotypic cell-cell adhesion	0.00423	1	0.0112	0.0991	4	TGFB1,IGF2,CD44,AKT1
GO: Biological Process	GO:0050730	regulation of peptidyl-tyrosine phosphorylation	0.00449	1	0.0118	0.105	4	TGFB1,IGF2,EGFR,CD44
GO: Biological Process	GO:0043122	regulation of I-kappaB kinase/NF-kappaB signaling	0.00455	1	0.0119	0.106	4	ESR1,TNF,CTNNB1,PTGS2
GO: Biological Process	GO:0060560	developmental growth involved in morphogenesis	0.00462	1	0.0121	0.107	4	TGFB1,SPP1,ESR1,FGFR2
GO: Biological Process	GO:0051924	regulation of calcium ion transport	0.00469	1	0.0123	0.109	4	TGFB1,BCL2,CTNNB1,PTGS2
GO: Biological Process	GO:0000209	protein polyubiquitination	0.00548	1	0.0137	0.121	4	CDKN2A,BRCA1,BCL2,SKP2
GO: Biological Process	GO:0090287	regulation of cellular response to growth factor stimulus	0.00563	1	0.0138	0.122	4	TGFB1,CYR61,FGFR2,CTNNB1
GO: Biological Process	GO:0042180	cellular ketone metabolic process	0.00563	1	0.0138	0.122	4	BRCA1,APC,AKT1,PTGS2
GO: Biological Process	GO:0010506	regulation of autophagy	0.00627	1	0.0151	0.134	4	MET,KIAA1324,AKT1,BCL2
GO: Biological Process	GO:0051648	vesicle localization	0.00652	1	0.0156	0.138	4	BRAF,FGFR2,CTNNB1,PTEN
GO: Biological Process	GO:0007249	I-kappaB kinase/NF-kappaB signaling	0.00687	1	0.0164	0.145	4	ESR1,TNF,CTNNB1,PTGS2
GO: Biological Process	GO:0002449	lymphocyte mediated immunity	0.00687	1	0.0164	0.145	4	TGFB1,IGF2,TNF,MSH2
GO: Biological Process	GO:0051403	stress-activated MAPK cascade	0.00696	1	0.0165	0.146	4	MYC,MET,AKT1,TNF
GO: Biological Process	GO:0043414	macromolecule methylation	0.00704	1	0.0166	0.147	4	BRCA1,CTNNB1,EZH2,DNMT1
GO: Biological Process	GO:0031098	stress-activated protein kinase signaling cascade	0.0075	1	0.0176	0.155	4	MYC,MET,AKT1,TNF
GO: Biological Process	GO:0090596	sensory organ morphogenesis	0.00931	1	0.0205	0.182	4	MYC,BCL2,FGFR2,CTNNB1
GO: Biological Process	GO:0045089	positive regulation of innate immune response	0.0103	1	0.0225	0.199	4	KRAS,ESR1,TNF,MMP2
GO: Biological Process	GO:0006650	glycerophospholipid metabolic process	0.0114	1	0.0238	0.21	4	ERBB2,EGFR,FGFR2,PTEN
GO: Biological Process	GO:0032147	activation of protein kinase activity	0.0116	1	0.0242	0.214	4	MET,BRAF,EGFR,TNF
GO: Biological Process	GO:0030111	regulation of Wnt signaling pathway	0.0124	1	0.0256	0.227	4	APC,FGFR2,TERT,CDH1
GO: Biological Process	GO:0071375	cellular response to peptide hormone stimulus	0.0126	1	0.0261	0.231	4	IGF2,AKT1,CTNNB1,MDM2
GO: Biological Process	GO:0048562	embryonic organ morphogenesis	0.0129	1	0.0266	0.235	4	MYC,FGFR2,CTNNB1,MMP14
GO: Biological Process	GO:0007059	chromosome segregation	0.0139	1	0.0274	0.242	4	PTTG1,BRCA1,APC,CTNNB1
GO: Biological Process	GO:1901653	cellular response to peptide	0.0149	1	0.0291	0.257	4	IGF2,AKT1,CTNNB1,MDM2
GO: Biological Process	GO:0006470	protein dephosphorylation	0.0154	1	0.0301	0.266	4	TGFB1,BCL2,TNF,PTEN
GO: Biological Process	GO:0032259	methylation	0.0162	1	0.0312	0.276	4	BRCA1,CTNNB1,EZH2,DNMT1
GO: Biological Process	GO:0002443	leukocyte mediated immunity	0.0173	1	0.0322	0.285	4	TGFB1,IGF2,TNF,MSH2
GO: Biological Process	GO:0046128	purine ribonucleoside metabolic process	0.0181	1	0.0336	0.297	4	TGFB1,MYC,MSH2,DNMT1
GO: Biological Process	GO:0042278	purine nucleoside metabolic process	0.0186	1	0.0344	0.304	4	TGFB1,MYC,MSH2,DNMT1
GO: Biological Process	GO:0031346	positive regulation of cell projection organization	0.0191	1	0.0351	0.311	4	MET,BRAF,APC,EZH2
GO: Biological Process	GO:0003002	regionalization	0.0196	1	0.0355	0.314	4	WT1,APC,FGFR2,CTNNB1
GO: Biological Process	GO:0045666	positive regulation of neuron differentiation	0.0207	1	0.0374	0.33	4	MET,BRAF,BCL2,EZH2
GO: Biological Process	GO:0009119	ribonucleoside metabolic process	0.0235	1	0.0412	0.365	4	TGFB1,MYC,MSH2,DNMT1
GO: Biological Process	GO:0006091	generation of precursor metabolites and energy	0.0239	1	0.0418	0.37	4	MYC,IGF2,AKT1,MSH2
GO: Biological Process	GO:0002250	adaptive immune response	0.0257	1	0.0438	0.387	4	TGFB1,CD44,TNF,MSH2
GO: Biological Process	GO:0006816	calcium ion transport	0.0263	1	0.0447	0.396	4	TGFB1,BCL2,CTNNB1,PTGS2
GO: Biological Process	GO:0009116	nucleoside metabolic process	0.028	1	0.0469	0.415	4	TGFB1,MYC,MSH2,DNMT1
GO: Biological Process	GO:1903532	positive regulation of secretion by cell	0.0289	1	0.0483	0.427	4	TGFB1,EGFR,TNF,SDC1
GO: Cellular Component	GO:0031093	platelet alpha granule lumen	1.52e-05	0.00452	0.000376	0.00236	4	TGFB1,SPARC,IGF2,TIMP1
GO: Cellular Component	GO:0005913	cell-cell adherens junction	3.53e-05	0.0105	0.000601	0.00377	4	NDRG1,APC,CTNNB1,CDH1
GO: Cellular Component	GO:0031091	platelet alpha granule	5.19e-05	0.0155	0.000703	0.00441	4	TGFB1,SPARC,IGF2,TIMP1
GO: Cellular Component	GO:0019897	extrinsic component of plasma membrane	0.000782	0.233	0.00506	0.0318	4	KRAS,APC,CTNNB1,CDH1
GO: Cellular Component	GO:0044306	neuron projection terminus	0.00211	0.629	0.011	0.0692	4	ESR1,APC,CDH1,PGR
GO: Cellular Component	GO:0005938	cell cortex	0.00594	1	0.0206	0.129	4	APC,FGFR2,CTNNB1,CDH1
GO: Cellular Component	GO:0019898	extrinsic component of membrane	0.00692	1	0.0229	0.144	4	KRAS,APC,CTNNB1,CDH1
GO: Cellular Component	GO:0005819	spindle	0.00985	1	0.0306	0.192	4	MYC,RASSF1,AKT1,CTNNB1
GO: Cellular Component	GO:0033267	axon part	0.00996	1	0.0306	0.192	4	ESR1,APC,CDH1,PGR
GO: Cellular Component	GO:0099568	cytoplasmic region	0.0118	1	0.0342	0.215	4	APC,FGFR2,CTNNB1,CDH1
GO: Cellular Component	GO:0016324	apical plasma membrane	0.0131	1	0.0371	0.233	4	ERBB2,EGFR,CD44,PTEN
GO: Cellular Component	GO:0098687	chromosomal region	0.0143	1	0.0384	0.241	4	APC,MSH2,TERT,DNMT1
GO: Molecular Function	GO:0030235	nitric-oxide synthase regulator activity	2.42e-06	0.00092	8.37e-05	0.000546	3	EGFR,ESR1,AKT1
GO: Molecular Function	GO:0045296	cadherin binding	9.56e-05	0.0364	0.0013	0.0085	3	NDRG1,APC,CTNNB1
GO: Molecular Function	GO:0001968	fibronectin binding	0.000105	0.04	0.0013	0.0085	3	IGFBP3,MMP2,MMP9
GO: Molecular Function	GO:0016538	cyclin-dependent protein serine/threonine kinase regulator activity	0.000137	0.052	0.00141	0.00917	3	CCNE1,CDKN1B,CDKN2A
GO: Molecular Function	GO:0050681	androgen receptor binding	0.000202	0.0769	0.00188	0.0122	3	CCNE1,BRCA1,CTNNB1
GO: Molecular Function	GO:0004879	nuclear receptor activity	0.000365	0.139	0.0029	0.0189	3	ESR1,ESR2,PGR
GO: Molecular Function	GO:0098531	transcription factor activity, direct ligand regulated sequence-specific DNA binding	0.000365	0.139	0.0029	0.0189	3	ESR1,ESR2,PGR
GO: Molecular Function	GO:0005160	transforming growth factor beta receptor binding	0.000433	0.165	0.00324	0.0211	3	TGFB1,GDF15,CD44
GO: Molecular Function	GO:0050840	extracellular matrix binding	0.00051	0.194	0.00366	0.0239	3	SPARC,CYR61,SPP1
GO: Molecular Function	GO:0003707	steroid hormone receptor activity	0.000594	0.226	0.0039	0.0255	3	ESR1,ESR2,PGR
GO: Molecular Function	GO:0046934	phosphatidylinositol-4,5-bisphosphate 3-kinase activity	0.000687	0.262	0.00436	0.0285	3	ERBB2,EGFR,FGFR2
GO: Molecular Function	GO:0052813	phosphatidylinositol bisphosphate kinase activity	0.00106	0.405	0.00614	0.04	3	ERBB2,EGFR,FGFR2
GO: Molecular Function	GO:0005518	collagen binding	0.00106	0.405	0.00614	0.04	3	SPARC,CD44,MMP9
GO: Molecular Function	GO:0035004	phosphatidylinositol 3-kinase activity	0.00129	0.492	0.00692	0.0452	3	ERBB2,EGFR,FGFR2
GO: Molecular Function	GO:0005496	steroid binding	0.00297	1	0.0127	0.0828	3	ESR1,ESR2,PGR
GO: Molecular Function	GO:0031072	heat shock protein binding	0.00322	1	0.013	0.085	3	CDKN1B,ERBB2,PTTG1
GO: Molecular Function	GO:0047485	protein N-terminus binding	0.00425	1	0.0163	0.106	3	TGFB1,CDKN2A,RASSF1
GO: Molecular Function	GO:0005178	integrin binding	0.00466	1	0.0176	0.115	3	CYR61,EGFR,MMP14
GO: Biological Process	GO:0071681	cellular response to indole-3-methanol	2.05e-07	0.000795	1.98e-06	1.75e-05	3	BRCA1,CTNNB1,CDH1
GO: Biological Process	GO:0071680	response to indole-3-methanol	2.05e-07	0.000795	1.98e-06	1.75e-05	3	BRCA1,CTNNB1,CDH1
GO: Biological Process	GO:0044336	canonical Wnt signaling pathway involved in negative regulation of apoptotic process	4.08e-07	0.00159	3.64e-06	3.22e-05	3	MYC,APC,CTNNB1
GO: Biological Process	GO:0031657	regulation of cyclin-dependent protein serine/threonine kinase activity involved in G1/S transition of mitotic cell cycle	1.7e-06	0.00662	1.29e-05	0.000114	3	EGFR,AKT1,PTEN
GO: Biological Process	GO:1903798	regulation of production of miRNAs involved in gene silencing by miRNA	1.7e-06	0.00662	1.29e-05	0.000114	3	TGFB1,EGFR,ESR1
GO: Biological Process	GO:0060149	negative regulation of posttranscriptional gene silencing	2.43e-06	0.00944	1.76e-05	0.000156	3	TGFB1,ESR1,TERT
GO: Biological Process	GO:0060768	regulation of epithelial cell proliferation involved in prostate gland development	2.43e-06	0.00944	1.76e-05	0.000156	3	CDKN1B,APC,CTNNB1
GO: Biological Process	GO:0060967	negative regulation of gene silencing by RNA	2.43e-06	0.00944	1.76e-05	0.000156	3	TGFB1,ESR1,TERT
GO: Biological Process	GO:0060693	regulation of branching involved in salivary gland morphogenesis	3.34e-06	0.013	2.29e-05	0.000202	3	MET,TNF,CDH1
GO: Biological Process	GO:1990874	vascular smooth muscle cell proliferation	3.34e-06	0.013	2.29e-05	0.000202	3	CDKN1B,MDM2,TERT
GO: Biological Process	GO:0060767	epithelial cell proliferation involved in prostate gland development	3.34e-06	0.013	2.29e-05	0.000202	3	CDKN1B,APC,CTNNB1
GO: Biological Process	GO:1904705	regulation of vascular smooth muscle cell proliferation	3.34e-06	0.013	2.29e-05	0.000202	3	CDKN1B,MDM2,TERT
GO: Biological Process	GO:0043217	myelin maintenance	5.76e-06	0.0224	3.67e-05	0.000325	3	NDRG1,AKT1,PTEN
GO: Biological Process	GO:0060736	prostate gland growth	7.31e-06	0.0284	4.59e-05	0.000406	3	ESR1,FGFR2,PTEN
GO: Biological Process	GO:0097094	craniofacial suture morphogenesis	9.12e-06	0.0355	5.58e-05	0.000494	3	TGFB1,FGFR2,MMP14
GO: Biological Process	GO:0010763	positive regulation of fibroblast migration	9.12e-06	0.0355	5.58e-05	0.000494	3	TGFB1,AKT1,MMP1
GO: Biological Process	GO:0060442	branching involved in prostate gland morphogenesis	9.12e-06	0.0355	5.58e-05	0.000494	3	ESR1,CD44,FGFR2
GO: Biological Process	GO:0060742	epithelial cell differentiation involved in prostate gland development	9.12e-06	0.0355	5.58e-05	0.000494	3	ESR2,FGFR2,CTNNB1
GO: Biological Process	GO:0090344	negative regulation of cell aging	1.36e-05	0.0528	8.08e-05	0.000715	3	PTEN,TERT,CDK6
GO: Biological Process	GO:0051571	positive regulation of histone H3-K4 methylation	1.36e-05	0.0528	8.08e-05	0.000715	3	BRCA1,CTNNB1,DNMT1
GO: Biological Process	GO:0071236	cellular response to antibiotic	1.63e-05	0.0632	9.48e-05	0.000838	3	CDKN1B,MDM2,EZH2
GO: Biological Process	GO:0060969	negative regulation of gene silencing	1.93e-05	0.0749	0.00011	0.000974	3	TGFB1,ESR1,TERT
GO: Biological Process	GO:1901889	negative regulation of cell junction assembly	2.26e-05	0.0879	0.000127	0.00112	3	TNF,PTEN,MMP14
GO: Biological Process	GO:0046325	negative regulation of glucose import	2.26e-05	0.0879	0.000127	0.00112	3	MYC,ESR1,TNF
GO: Biological Process	GO:0071285	cellular response to lithium ion	2.26e-05	0.0879	0.000127	0.00112	3	CDKN1B,CTNNB1,CDH1
GO: Biological Process	GO:0051043	regulation of membrane protein ectodomain proteolysis	2.64e-05	0.102	0.000145	0.00128	3	TIMP1,TIMP3,TNF
GO: Biological Process	GO:0002902	regulation of B cell apoptotic process	2.64e-05	0.102	0.000145	0.00128	3	MYC,CD44,PTEN
GO: Biological Process	GO:0060602	branch elongation of an epithelium	3.05e-05	0.118	0.000163	0.00144	3	TGFB1,ESR1,FGFR2
GO: Biological Process	GO:0060065	uterus development	3.05e-05	0.118	0.000163	0.00144	3	ESR1,ESR2,CDH1
GO: Biological Process	GO:0010829	negative regulation of glucose transmembrane transport	3.5e-05	0.136	0.000184	0.00163	3	MYC,ESR1,TNF
GO: Biological Process	GO:0060964	regulation of gene silencing by miRNA	3.5e-05	0.136	0.000184	0.00163	3	TGFB1,EGFR,ESR1
GO: Biological Process	GO:0048679	regulation of axon regeneration	3.5e-05	0.136	0.000184	0.00163	3	BRAF,SPP1,PTEN
GO: Biological Process	GO:0014002	astrocyte development	3.5e-05	0.136	0.000184	0.00163	3	KRAS,EGFR,CDK6
GO: Biological Process	GO:0072215	regulation of metanephros development	3.99e-05	0.155	0.000207	0.00183	3	MYC,WT1,CTNNB1
GO: Biological Process	GO:0033688	regulation of osteoblast proliferation	4.52e-05	0.176	0.000233	0.00206	3	CYR61,BCL2,FGFR2
GO: Biological Process	GO:0010575	positive regulation of vascular endothelial growth factor production	5.1e-05	0.198	0.000259	0.00229	3	TGFB1,BRCA1,PTGS2
GO: Biological Process	GO:0043536	positive regulation of blood vessel endothelial cell migration	5.73e-05	0.223	0.000288	0.00254	3	TGFB1,AKT1,PTGS2
GO: Biological Process	GO:0090322	regulation of superoxide metabolic process	5.73e-05	0.223	0.000288	0.00254	3	TGFB1,EGFR,TNF
GO: Biological Process	GO:0097237	cellular response to toxic substance	5.73e-05	0.223	0.000288	0.00254	3	CDKN1B,MDM2,EZH2
GO: Biological Process	GO:0070570	regulation of neuron projection regeneration	5.73e-05	0.223	0.000288	0.00254	3	BRAF,SPP1,PTEN
GO: Biological Process	GO:0001783	B cell apoptotic process	5.73e-05	0.223	0.000288	0.00254	3	MYC,CD44,PTEN
GO: Biological Process	GO:2000008	regulation of protein localization to cell surface	6.4e-05	0.249	0.000317	0.00281	3	TNF,CTNNB1,CDH1
GO: Biological Process	GO:0060571	morphogenesis of an epithelial fold	6.4e-05	0.249	0.000317	0.00281	3	EGFR,FGFR2,CTNNB1
GO: Biological Process	GO:0060444	branching involved in mammary gland duct morphogenesis	6.4e-05	0.249	0.000317	0.00281	3	TGFB1,ESR1,PGR
GO: Biological Process	GO:0051569	regulation of histone H3-K4 methylation	7.13e-05	0.277	0.00035	0.00309	3	BRCA1,CTNNB1,DNMT1
GO: Biological Process	GO:0033687	osteoblast proliferation	7.13e-05	0.277	0.00035	0.00309	3	CYR61,BCL2,FGFR2
GO: Biological Process	GO:0043516	regulation of DNA damage response, signal transduction by p53 class mediator	7.9e-05	0.307	0.000382	0.00338	3	CDKN2A,CD44,MDM2
GO: Biological Process	GO:0010831	positive regulation of myotube differentiation	8.73e-05	0.339	0.000416	0.00367	3	GDF15,BCL2,MMP14
GO: Biological Process	GO:0035196	production of miRNAs involved in gene silencing by miRNA	8.73e-05	0.339	0.000416	0.00367	3	TGFB1,EGFR,ESR1
GO: Biological Process	GO:0001953	negative regulation of cell-matrix adhesion	8.73e-05	0.339	0.000416	0.00367	3	CDKN2A,PTEN,MMP14
GO: Biological Process	GO:0010574	regulation of vascular endothelial growth factor production	0.000106	0.41	0.00049	0.00433	3	TGFB1,BRCA1,PTGS2
GO: Biological Process	GO:0043368	positive T cell selection	0.000106	0.41	0.00049	0.00433	3	TGFB1,BRAF,BCL2
GO: Biological Process	GO:0034105	positive regulation of tissue remodeling	0.000106	0.41	0.00049	0.00433	3	CDKN2A,EGFR,SPP1
GO: Biological Process	GO:2000108	positive regulation of leukocyte apoptotic process	0.000116	0.449	0.000524	0.00463	3	MYC,CDKN2A,CD44
GO: Biological Process	GO:0010718	positive regulation of epithelial to mesenchymal transition	0.000116	0.449	0.000524	0.00463	3	TGFB1,CTNNB1,EZH2
GO: Biological Process	GO:0045581	negative regulation of T cell differentiation	0.000116	0.449	0.000524	0.00463	3	CDKN2A,ERBB2,CD44
GO: Biological Process	GO:0002053	positive regulation of mesenchymal cell proliferation	0.000126	0.49	0.000564	0.00499	3	MYC,FGFR2,CTNNB1
GO: Biological Process	GO:0010573	vascular endothelial growth factor production	0.000126	0.49	0.000564	0.00499	3	TGFB1,BRCA1,PTGS2
GO: Biological Process	GO:0003401	axis elongation	0.000126	0.49	0.000564	0.00499	3	TGFB1,ESR1,FGFR2
GO: Biological Process	GO:1902742	apoptotic process involved in development	0.000137	0.534	0.000607	0.00536	3	CDKN2A,CYR61,WT1
GO: Biological Process	GO:0045737	positive regulation of cyclin-dependent protein serine/threonine kinase activity	0.000137	0.534	0.000607	0.00536	3	CDKN1B,EGFR,AKT1
GO: Biological Process	GO:0031062	positive regulation of histone methylation	0.000149	0.58	0.000655	0.00579	3	BRCA1,CTNNB1,DNMT1
GO: Biological Process	GO:1904031	positive regulation of cyclin-dependent protein kinase activity	0.000162	0.628	0.000696	0.00616	3	CDKN1B,EGFR,AKT1
GO: Biological Process	GO:0032885	regulation of polysaccharide biosynthetic process	0.000162	0.628	0.000696	0.00616	3	TGFB1,IGF2,AKT1
GO: Biological Process	GO:1990090	cellular response to nerve growth factor stimulus	0.000162	0.628	0.000696	0.00616	3	APC,AKT1,DNMT1
GO: Biological Process	GO:0014009	glial cell proliferation	0.000175	0.679	0.000741	0.00655	3	MYC,CTNNB1,TERT
GO: Biological Process	GO:0030212	hyaluronan metabolic process	0.000175	0.679	0.000741	0.00655	3	TGFB1,CD44,AKT1
GO: Biological Process	GO:0033280	response to vitamin D	0.000175	0.679	0.000741	0.00655	3	TGFB1,SPP1,PTGS2
GO: Biological Process	GO:1990089	response to nerve growth factor	0.000203	0.789	0.00085	0.00752	3	APC,AKT1,DNMT1
GO: Biological Process	GO:0006509	membrane protein ectodomain proteolysis	0.000218	0.848	0.000901	0.00797	3	TIMP1,TIMP3,TNF
GO: Biological Process	GO:0019048	modulation by virus of host morphology or physiology	0.000218	0.848	0.000901	0.00797	3	TGFB1,MYC,MMP9
GO: Biological Process	GO:0010464	regulation of mesenchymal cell proliferation	0.000234	0.91	0.000964	0.00852	3	MYC,FGFR2,CTNNB1
GO: Biological Process	GO:0090184	positive regulation of kidney development	0.000251	0.975	0.00102	0.00902	3	TGFB1,MYC,WT1
GO: Biological Process	GO:0045620	negative regulation of lymphocyte differentiation	0.000251	0.975	0.00102	0.00902	3	CDKN2A,ERBB2,CD44
GO: Biological Process	GO:1904837	beta-catenin-TCF complex assembly	0.000251	0.975	0.00102	0.00902	3	MYC,CTNNB1,TERT
GO: Biological Process	GO:0045907	positive regulation of vasoconstriction	0.000251	0.975	0.00102	0.00902	3	EGFR,AKT1,PTGS2
GO: Biological Process	GO:1904036	negative regulation of epithelial cell apoptotic process	0.000268	1	0.00108	0.00957	3	BRAF,TERT,PGR
GO: Biological Process	GO:0060323	head morphogenesis	0.000268	1	0.00108	0.00957	3	TGFB1,BRAF,MMP2
GO: Biological Process	GO:0032881	regulation of polysaccharide metabolic process	0.000268	1	0.00108	0.00957	3	TGFB1,IGF2,AKT1
GO: Biological Process	GO:0046686	response to cadmium ion	0.000286	1	0.00114	0.0101	3	CDKN1B,SPARC,CTNNB1
GO: Biological Process	GO:0060038	cardiac muscle cell proliferation	0.000305	1	0.00121	0.0107	3	FGFR2,CTNNB1,PTEN
GO: Biological Process	GO:0043029	T cell homeostasis	0.000325	1	0.00128	0.0113	3	TGFB1,AKT1,BCL2
GO: Biological Process	GO:0010623	programmed cell death involved in cell development	0.000325	1	0.00128	0.0113	3	CDKN2A,CYR61,BCL2
GO: Biological Process	GO:0045058	T cell selection	0.000346	1	0.00134	0.0119	3	TGFB1,BRAF,BCL2
GO: Biological Process	GO:0006921	cellular component disassembly involved in execution phase of apoptosis	0.000367	1	0.00142	0.0125	3	CDKN2A,IGFBP3,APC
GO: Biological Process	GO:0070830	bicellular tight junction assembly	0.000367	1	0.00142	0.0125	3	APC,TNF,CDH1
GO: Biological Process	GO:0043388	positive regulation of DNA binding	0.000367	1	0.00142	0.0125	3	TGFB1,MYC,MMP9
GO: Biological Process	GO:0034394	protein localization to cell surface	0.000389	1	0.00149	0.0132	3	TNF,CTNNB1,CDH1
GO: Biological Process	GO:0046677	response to antibiotic	0.000389	1	0.00149	0.0132	3	CDKN1B,MDM2,EZH2
GO: Biological Process	GO:0048701	embryonic cranial skeleton morphogenesis	0.000389	1	0.00149	0.0132	3	FGFR2,CTNNB1,MMP14
GO: Biological Process	GO:0044003	modification by symbiont of host morphology or physiology	0.000389	1	0.00149	0.0132	3	TGFB1,MYC,MMP9
GO: Biological Process	GO:0045661	regulation of myoblast differentiation	0.000412	1	0.00156	0.0138	3	TGFB1,IGFBP3,TNF
GO: Biological Process	GO:0042993	positive regulation of transcription factor import into nucleus	0.000436	1	0.00164	0.0145	3	TNF,CDH1,PTGS2
GO: Biological Process	GO:0060711	labyrinthine layer development	0.000436	1	0.00164	0.0145	3	CYR61,AKT1,FGFR2
GO: Biological Process	GO:0051568	histone H3-K4 methylation	0.000461	1	0.00171	0.0151	3	BRCA1,CTNNB1,DNMT1
GO: Biological Process	GO:0048641	regulation of skeletal muscle tissue development	0.000461	1	0.00171	0.0151	3	TGFB1,BCL2,CTNNB1
GO: Biological Process	GO:0010828	positive regulation of glucose transmembrane transport	0.000461	1	0.00171	0.0151	3	MET,AKT1,TERT
GO: Biological Process	GO:0043535	regulation of blood vessel endothelial cell migration	0.000461	1	0.00171	0.0151	3	TGFB1,AKT1,PTGS2
GO: Biological Process	GO:2000378	negative regulation of reactive oxygen species metabolic process	0.000461	1	0.00171	0.0151	3	BRCA1,ESR2,BCL2
GO: Biological Process	GO:0035094	response to nicotine	0.000461	1	0.00171	0.0151	3	IGF2,BCL2,TNF
GO: Biological Process	GO:2000738	positive regulation of stem cell differentiation	0.000461	1	0.00171	0.0151	3	TGFB1,CTNNB1,EZH2
GO: Biological Process	GO:0010463	mesenchymal cell proliferation	0.000461	1	0.00171	0.0151	3	MYC,FGFR2,CTNNB1
GO: Biological Process	GO:0010812	negative regulation of cell-substrate adhesion	0.000461	1	0.00171	0.0151	3	CDKN2A,PTEN,MMP14
GO: Biological Process	GO:0035195	gene silencing by miRNA	0.000486	1	0.00179	0.0159	3	TGFB1,EGFR,ESR1
GO: Biological Process	GO:0033619	membrane protein proteolysis	0.000486	1	0.00179	0.0159	3	TIMP1,TIMP3,TNF
GO: Biological Process	GO:0060420	regulation of heart growth	0.000513	1	0.00187	0.0166	3	WT1,FGFR2,PTEN
GO: Biological Process	GO:0031663	lipopolysaccharide-mediated signaling pathway	0.000513	1	0.00187	0.0166	3	TGFB1,AKT1,TNF
GO: Biological Process	GO:0051926	negative regulation of calcium ion transport	0.000513	1	0.00187	0.0166	3	TGFB1,BCL2,PTGS2
GO: Biological Process	GO:1902117	positive regulation of organelle assembly	0.00054	1	0.00196	0.0173	3	KIAA1324,TNF,SDC1
GO: Biological Process	GO:0060411	cardiac septum morphogenesis	0.00054	1	0.00196	0.0173	3	CYR61,FGFR2,MDM2
GO: Biological Process	GO:0043297	apical junction assembly	0.000569	1	0.00205	0.0181	3	APC,TNF,CDH1
GO: Biological Process	GO:0010830	regulation of myotube differentiation	0.000569	1	0.00205	0.0181	3	GDF15,BCL2,MMP14
GO: Biological Process	GO:0051145	smooth muscle cell differentiation	0.000598	1	0.00215	0.019	3	TGFB1,FGFR2,CTNNB1
GO: Biological Process	GO:0060324	face development	0.000598	1	0.00215	0.019	3	TGFB1,BRAF,MMP2
GO: Biological Process	GO:1902041	regulation of extrinsic apoptotic signaling pathway via death domain receptors	0.000628	1	0.00225	0.0199	3	BRCA1,TIMP3,PTEN
GO: Biological Process	GO:0071695	anatomical structure maturation	0.000659	1	0.00233	0.0206	3	AKT1,MMP2,PTGS2
GO: Biological Process	GO:0001836	release of cytochrome c from mitochondria	0.000659	1	0.00233	0.0206	3	AKT1,BCL2,MMP9
GO: Biological Process	GO:0030858	positive regulation of epithelial cell differentiation	0.000659	1	0.00233	0.0206	3	APC,BCL2,CTNNB1
GO: Biological Process	GO:2001238	positive regulation of extrinsic apoptotic signaling pathway	0.000659	1	0.00233	0.0206	3	TIMP3,RUNX3,PTEN
GO: Biological Process	GO:0007405	neuroblast proliferation	0.000659	1	0.00233	0.0206	3	TGFB1,FGFR2,CTNNB1
GO: Biological Process	GO:0006801	superoxide metabolic process	0.000659	1	0.00233	0.0206	3	TGFB1,EGFR,TNF
GO: Biological Process	GO:0006027	glycosaminoglycan catabolic process	0.000659	1	0.00233	0.0206	3	TGFB1,CD44,SDC1
GO: Biological Process	GO:0051148	negative regulation of muscle cell differentiation	0.000659	1	0.00233	0.0206	3	TGFB1,TNF,EZH2
GO: Biological Process	GO:0034502	protein localization to chromosome	0.000659	1	0.00233	0.0206	3	ESR1,EZH2,TERT
GO: Biological Process	GO:0010171	body morphogenesis	0.000659	1	0.00233	0.0206	3	TGFB1,BRAF,MMP2
GO: Biological Process	GO:1901992	positive regulation of mitotic cell cycle phase transition	0.000659	1	0.00233	0.0206	3	TGFB1,MDM2,TERT
GO: Biological Process	GO:0010507	negative regulation of autophagy	0.000691	1	0.00242	0.0214	3	MET,AKT1,BCL2
GO: Biological Process	GO:0014855	striated muscle cell proliferation	0.000691	1	0.00242	0.0214	3	FGFR2,CTNNB1,PTEN
GO: Biological Process	GO:0051881	regulation of mitochondrial membrane potential	0.000691	1	0.00242	0.0214	3	MYC,CDKN2A,BCL2
GO: Biological Process	GO:0031060	regulation of histone methylation	0.000725	1	0.00253	0.0223	3	BRCA1,CTNNB1,DNMT1
GO: Biological Process	GO:0006611	protein export from nucleus	0.000759	1	0.00263	0.0233	3	TGFB1,CDKN2A,MDM2
GO: Biological Process	GO:0001885	endothelial cell development	0.000759	1	0.00263	0.0233	3	MET,TNF,CTNNB1
GO: Biological Process	GO:0055024	regulation of cardiac muscle tissue development	0.000794	1	0.00272	0.0241	3	TGFB1,FGFR2,PTEN
GO: Biological Process	GO:0061035	regulation of cartilage development	0.00083	1	0.00284	0.0251	3	TGFB1,CYR61,CTNNB1
GO: Biological Process	GO:0003281	ventricular septum development	0.00083	1	0.00284	0.0251	3	CYR61,FGFR2,MDM2
GO: Biological Process	GO:0045453	bone resorption	0.000867	1	0.00295	0.0261	3	EGFR,SPP1,CTNNB1
GO: Biological Process	GO:0006305	DNA alkylation	0.000867	1	0.00295	0.0261	3	BRCA1,EZH2,DNMT1
GO: Biological Process	GO:0006306	DNA methylation	0.000867	1	0.00295	0.0261	3	BRCA1,EZH2,DNMT1
GO: Biological Process	GO:1901989	positive regulation of cell cycle phase transition	0.000867	1	0.00295	0.0261	3	TGFB1,MDM2,TERT
GO: Biological Process	GO:0009880	embryonic pattern specification	0.000867	1	0.00295	0.0261	3	WT1,FGFR2,CTNNB1
GO: Biological Process	GO:0033045	regulation of sister chromatid segregation	0.000905	1	0.00304	0.0269	3	PTTG1,APC,CTNNB1
GO: Biological Process	GO:0006026	aminoglycan catabolic process	0.000905	1	0.00304	0.0269	3	TGFB1,CD44,SDC1
GO: Biological Process	GO:0060976	coronary vasculature development	0.000945	1	0.00316	0.028	3	WT1,FGFR2,CTNNB1
GO: Biological Process	GO:0048645	animal organ formation	0.000945	1	0.00316	0.028	3	WT1,FGFR2,CTNNB1
GO: Biological Process	GO:1900407	regulation of cellular response to oxidative stress	0.000945	1	0.00316	0.028	3	MET,AKT1,TNF
GO: Biological Process	GO:0070228	regulation of lymphocyte apoptotic process	0.000985	1	0.00329	0.0291	3	MYC,CD44,PTEN
GO: Biological Process	GO:0010717	regulation of epithelial to mesenchymal transition	0.000985	1	0.00329	0.0291	3	TGFB1,CTNNB1,EZH2
GO: Biological Process	GO:0048708	astrocyte differentiation	0.00103	1	0.00339	0.03	3	KRAS,EGFR,CDK6
GO: Biological Process	GO:1901888	regulation of cell junction assembly	0.00103	1	0.00339	0.03	3	TNF,PTEN,MMP14
GO: Biological Process	GO:0033143	regulation of intracellular steroid hormone receptor signaling pathway	0.00107	1	0.00351	0.0311	3	BRCA1,ESR2,SKP2
GO: Biological Process	GO:0007045	cell-substrate adherens junction assembly	0.00107	1	0.00351	0.0311	3	BCL2,PTEN,MMP14
GO: Biological Process	GO:0048041	focal adhesion assembly	0.00107	1	0.00351	0.0311	3	BCL2,PTEN,MMP14
GO: Biological Process	GO:0014823	response to activity	0.00111	1	0.00364	0.0322	3	ESR2,CTNNB1,DNMT1
GO: Biological Process	GO:0045670	regulation of osteoclast differentiation	0.00111	1	0.00364	0.0322	3	APC,TNF,CTNNB1
GO: Biological Process	GO:0010676	positive regulation of cellular carbohydrate metabolic process	0.00111	1	0.00364	0.0322	3	MYC,IGF2,AKT1
GO: Biological Process	GO:0034644	cellular response to UV	0.00111	1	0.00364	0.0322	3	MYC,MDM2,PTGS2
GO: Biological Process	GO:0036473	cell death in response to oxidative stress	0.00111	1	0.00364	0.0322	3	MET,AKT1,BCL2
GO: Biological Process	GO:1904035	regulation of epithelial cell apoptotic process	0.00116	1	0.00375	0.0332	3	BRAF,TERT,PGR
GO: Biological Process	GO:0055017	cardiac muscle tissue growth	0.0012	1	0.0039	0.0344	3	FGFR2,CTNNB1,PTEN
GO: Biological Process	GO:1902882	regulation of response to oxidative stress	0.0012	1	0.0039	0.0344	3	MET,AKT1,TNF
GO: Biological Process	GO:0002088	lens development in camera-type eye	0.00125	1	0.00402	0.0356	3	TGFB1,FGFR2,CTNNB1
GO: Biological Process	GO:0050805	negative regulation of synaptic transmission	0.00125	1	0.00402	0.0356	3	BRAF,PTEN,PTGS2
GO: Biological Process	GO:0035710	CD4-positive, alpha-beta T cell activation	0.00125	1	0.00402	0.0356	3	TGFB1,BRAF,CD44
GO: Biological Process	GO:0035019	somatic stem cell population maintenance	0.0013	1	0.00413	0.0365	3	CDKN2A,BRAF,APC
GO: Biological Process	GO:0035690	cellular response to drug	0.00135	1	0.00427	0.0377	3	MYC,BRAF,ESR2
GO: Biological Process	GO:0043534	blood vessel endothelial cell migration	0.00135	1	0.00427	0.0377	3	TGFB1,AKT1,PTGS2
GO: Biological Process	GO:0000271	polysaccharide biosynthetic process	0.0014	1	0.00442	0.0391	3	TGFB1,IGF2,AKT1
GO: Biological Process	GO:0021766	hippocampus development	0.0015	1	0.00471	0.0416	3	PTEN,EZH2,CDK6
GO: Biological Process	GO:0044728	DNA methylation or demethylation	0.0015	1	0.00471	0.0416	3	BRCA1,EZH2,DNMT1
GO: Biological Process	GO:0045913	positive regulation of carbohydrate metabolic process	0.00167	1	0.00519	0.0458	3	MYC,IGF2,AKT1
GO: Biological Process	GO:0040014	regulation of multicellular organism growth	0.00173	1	0.00531	0.0469	3	IGF2,BCL2,FGFR2
GO: Biological Process	GO:0050764	regulation of phagocytosis	0.00179	1	0.00548	0.0484	3	TGFB1,TNF,PTEN
GO: Biological Process	GO:0034766	negative regulation of ion transmembrane transport	0.00185	1	0.00564	0.0499	3	TGFB1,AKT1,MMP9
GO: Biological Process	GO:0051983	regulation of chromosome segregation	0.00185	1	0.00564	0.0499	3	PTTG1,APC,CTNNB1
GO: Biological Process	GO:0007044	cell-substrate junction assembly	0.00197	1	0.00597	0.0528	3	BCL2,PTEN,MMP14
GO: Biological Process	GO:0001570	vasculogenesis	0.00197	1	0.00597	0.0528	3	WT1,FGFR2,CTNNB1
GO: Biological Process	GO:0051705	multi-organism behavior	0.00203	1	0.00611	0.054	3	KRAS,PTEN,PGR
GO: Biological Process	GO:0031100	animal organ regeneration	0.00203	1	0.00611	0.054	3	TGFB1,CCNE1,EZH2
GO: Biological Process	GO:0046620	regulation of organ growth	0.00216	1	0.00648	0.0573	3	WT1,FGFR2,PTEN
GO: Biological Process	GO:0002821	positive regulation of adaptive immune response	0.00216	1	0.00648	0.0573	3	TGFB1,CD44,TNF
GO: Biological Process	GO:0060349	bone morphogenesis	0.00216	1	0.00648	0.0573	3	TGFB1,FGFR2,MMP14
GO: Biological Process	GO:0033555	multicellular organismal response to stress	0.00223	1	0.00664	0.0587	3	ESR2,BCL2,PTEN
GO: Biological Process	GO:0050871	positive regulation of B cell activation	0.00223	1	0.00664	0.0587	3	TGFB1,BCL2,MMP14
GO: Biological Process	GO:0045638	negative regulation of myeloid cell differentiation	0.0023	1	0.00683	0.0603	3	MYC,CTNNB1,CDK6
GO: Biological Process	GO:0046854	phosphatidylinositol phosphorylation	0.0023	1	0.00683	0.0603	3	ERBB2,EGFR,FGFR2
GO: Biological Process	GO:0045740	positive regulation of DNA replication	0.0023	1	0.00683	0.0603	3	MET,EGFR,CTNNB1
GO: Biological Process	GO:0034763	negative regulation of transmembrane transport	0.00237	1	0.00702	0.0621	3	TGFB1,AKT1,MMP9
GO: Biological Process	GO:0007043	cell-cell junction assembly	0.00237	1	0.00702	0.0621	3	APC,TNF,CDH1
GO: Biological Process	GO:0051817	modification of morphology or physiology of other organism involved in symbiotic interaction	0.00244	1	0.00718	0.0635	3	TGFB1,MYC,MMP9
GO: Biological Process	GO:0046632	alpha-beta T cell differentiation	0.00244	1	0.00718	0.0635	3	TGFB1,BRAF,BCL2
GO: Biological Process	GO:0019217	regulation of fatty acid metabolic process	0.00252	1	0.00738	0.0653	3	BRCA1,AKT1,PTGS2
GO: Biological Process	GO:1904019	epithelial cell apoptotic process	0.00259	1	0.00756	0.0668	3	BRAF,TERT,PGR
GO: Biological Process	GO:0046834	lipid phosphorylation	0.00267	1	0.00776	0.0686	3	ERBB2,EGFR,FGFR2
GO: Biological Process	GO:0045778	positive regulation of ossification	0.00267	1	0.00776	0.0686	3	TGFB1,CYR61,CTNNB1
GO: Biological Process	GO:0043467	regulation of generation of precursor metabolites and energy	0.00274	1	0.00787	0.0696	3	MYC,IGF2,AKT1
GO: Biological Process	GO:0009798	axis specification	0.00274	1	0.00787	0.0696	3	WT1,APC,CTNNB1
GO: Biological Process	GO:0006304	DNA modification	0.00282	1	0.0079	0.0699	3	BRCA1,EZH2,DNMT1
GO: Biological Process	GO:0030316	osteoclast differentiation	0.00282	1	0.0079	0.0699	3	APC,TNF,CTNNB1
GO: Biological Process	GO:0042990	regulation of transcription factor import into nucleus	0.00282	1	0.0079	0.0699	3	TNF,CDH1,PTGS2
GO: Biological Process	GO:0044773	mitotic DNA damage checkpoint	0.00282	1	0.0079	0.0699	3	CDKN1B,MSH2,MDM2
GO: Biological Process	GO:0006112	energy reserve metabolic process	0.00298	1	0.0083	0.0734	3	MYC,IGF2,AKT1
GO: Biological Process	GO:0048704	embryonic skeletal system morphogenesis	0.00298	1	0.0083	0.0734	3	FGFR2,CTNNB1,MMP14
GO: Biological Process	GO:0043255	regulation of carbohydrate biosynthetic process	0.00298	1	0.0083	0.0734	3	TGFB1,IGF2,AKT1
GO: Biological Process	GO:0002377	immunoglobulin production	0.00307	1	0.0085	0.0752	3	TGFB1,TNF,MSH2
GO: Biological Process	GO:0042991	transcription factor import into nucleus	0.00307	1	0.0085	0.0752	3	TNF,CDH1,PTGS2
GO: Biological Process	GO:0090100	positive regulation of transmembrane receptor protein serine/threonine kinase signaling pathway	0.00315	1	0.00871	0.077	3	TGFB1,CYR61,GDF15
GO: Biological Process	GO:0002062	chondrocyte differentiation	0.00315	1	0.00871	0.077	3	TGFB1,CTNNB1,RUNX3
GO: Biological Process	GO:0003279	cardiac septum development	0.00315	1	0.00871	0.077	3	CYR61,FGFR2,MDM2
GO: Biological Process	GO:0044774	mitotic DNA integrity checkpoint	0.00332	1	0.00914	0.0808	3	CDKN1B,MSH2,MDM2
GO: Biological Process	GO:0099565	chemical synaptic transmission, postsynaptic	0.00341	1	0.00932	0.0824	3	MET,AKT1,PTEN
GO: Biological Process	GO:0030282	bone mineralization	0.0035	1	0.00954	0.0844	3	TGFB1,FGFR2,PTGS2
GO: Biological Process	GO:0045446	endothelial cell differentiation	0.0035	1	0.00954	0.0844	3	MET,TNF,CTNNB1
GO: Biological Process	GO:0035821	modification of morphology or physiology of other organism	0.00407	1	0.0108	0.0955	3	TGFB1,MYC,MMP9
GO: Biological Process	GO:1905114	cell surface receptor signaling pathway involved in cell-cell signaling	0.00407	1	0.0108	0.0955	3	MET,AKT1,PTEN
GO: Biological Process	GO:0002698	negative regulation of immune effector process	0.00417	1	0.0111	0.0977	3	TGFB1,IGF2,TNF
GO: Biological Process	GO:0055007	cardiac muscle cell differentiation	0.00427	1	0.0113	0.1	3	TGFB1,MET,WT1
GO: Biological Process	GO:1903510	mucopolysaccharide metabolic process	0.00437	1	0.0115	0.102	3	TGFB1,CD44,AKT1
GO: Biological Process	GO:0071482	cellular response to light stimulus	0.00458	1	0.012	0.106	3	MYC,MDM2,PTGS2
GO: Biological Process	GO:0005976	polysaccharide metabolic process	0.00469	1	0.0123	0.109	3	TGFB1,IGF2,AKT1
GO: Biological Process	GO:0001935	endothelial cell proliferation	0.0048	1	0.0125	0.111	3	SPARC,AKT1,MMP14
GO: Biological Process	GO:0022037	metencephalon development	0.00491	1	0.0128	0.113	3	ESR2,BCL2,EZH2
GO: Biological Process	GO:0007613	memory	0.00513	1	0.0133	0.117	3	IGF2,PTEN,PTGS2
GO: Biological Process	GO:0010906	regulation of glucose metabolic process	0.00513	1	0.0133	0.117	3	IGF2,IGFBP3,AKT1
GO: Biological Process	GO:0003158	endothelium development	0.0056	1	0.0138	0.122	3	MET,TNF,CTNNB1
GO: Biological Process	GO:0030183	B cell differentiation	0.0056	1	0.0138	0.122	3	BCL2,MSH2,MMP14
GO: Biological Process	GO:0010771	negative regulation of cell morphogenesis involved in differentiation	0.00572	1	0.014	0.124	3	SPP1,CTNNB1,PTEN
GO: Biological Process	GO:2000736	regulation of stem cell differentiation	0.00585	1	0.0142	0.126	3	TGFB1,CTNNB1,EZH2
GO: Biological Process	GO:0050729	positive regulation of inflammatory response	0.00597	1	0.0145	0.128	3	EGFR,TNF,PTGS2
GO: Biological Process	GO:0002706	regulation of lymphocyte mediated immunity	0.00597	1	0.0145	0.128	3	TGFB1,IGF2,TNF
GO: Biological Process	GO:0097480	establishment of synaptic vesicle localization	0.0061	1	0.0148	0.131	3	BRAF,FGFR2,CTNNB1
GO: Biological Process	GO:0048489	synaptic vesicle transport	0.0061	1	0.0148	0.131	3	BRAF,FGFR2,CTNNB1
GO: Biological Process	GO:1903650	negative regulation of cytoplasmic transport	0.0061	1	0.0148	0.131	3	TGFB1,BRAF,BCL2
GO: Biological Process	GO:0044344	cellular response to fibroblast growth factor stimulus	0.00648	1	0.0155	0.137	3	CD44,FGFR2,CTNNB1
GO: Biological Process	GO:0048706	embryonic skeletal system development	0.00648	1	0.0155	0.137	3	FGFR2,CTNNB1,MMP14
GO: Biological Process	GO:0050777	negative regulation of immune response	0.00702	1	0.0166	0.147	3	TGFB1,IGF2,TNF
GO: Biological Process	GO:0051092	positive regulation of NF-kappaB transcription factor activity	0.00702	1	0.0166	0.147	3	TGFB1,KRAS,TNF
GO: Biological Process	GO:0000723	telomere maintenance	0.00702	1	0.0166	0.147	3	MYC,CTNNB1,TERT
GO: Biological Process	GO:0071774	response to fibroblast growth factor	0.0073	1	0.0172	0.152	3	CD44,FGFR2,CTNNB1
GO: Biological Process	GO:0050821	protein stabilization	0.0073	1	0.0172	0.152	3	CDKN2A,RASSF1,PTEN
GO: Biological Process	GO:0002819	regulation of adaptive immune response	0.00744	1	0.0175	0.154	3	TGFB1,CD44,TNF
GO: Biological Process	GO:0016064	immunoglobulin mediated immune response	0.00744	1	0.0175	0.154	3	TGFB1,TNF,MSH2
GO: Biological Process	GO:0019724	B cell mediated immunity	0.00788	1	0.0184	0.163	3	TGFB1,TNF,MSH2
GO: Biological Process	GO:0043433	negative regulation of DNA binding transcription factor activity	0.00818	1	0.0186	0.165	3	CDKN2A,ESR1,EZH2
GO: Biological Process	GO:0050773	regulation of dendrite development	0.00848	1	0.0189	0.167	3	MET,PTEN,EZH2
GO: Biological Process	GO:0010977	negative regulation of neuron projection development	0.0088	1	0.0195	0.173	3	SPP1,PTEN,MDM2
GO: Biological Process	GO:0032200	telomere organization	0.00895	1	0.0198	0.175	3	MYC,CTNNB1,TERT
GO: Biological Process	GO:0032434	regulation of proteasomal ubiquitin-dependent protein catabolic process	0.00911	1	0.0202	0.178	3	APC,AKT1,MDM2
GO: Biological Process	GO:1902107	positive regulation of leukocyte differentiation	0.00944	1	0.0208	0.184	3	TGFB1,TNF,MMP14
GO: Biological Process	GO:0032387	negative regulation of intracellular transport	0.0103	1	0.0224	0.198	3	TGFB1,BRAF,BCL2
GO: Biological Process	GO:0007612	learning	0.0105	1	0.0227	0.201	3	KRAS,BRAF,PTGS2
GO: Biological Process	GO:0007605	sensory perception of sound	0.0106	1	0.0231	0.204	3	MYC,CDKN1B,CDH1
GO: Biological Process	GO:0061351	neural precursor cell proliferation	0.0112	1	0.0233	0.206	3	TGFB1,FGFR2,CTNNB1
GO: Biological Process	GO:0055002	striated muscle cell development	0.0112	1	0.0233	0.206	3	MET,BCL2,SDC1
GO: Biological Process	GO:0071222	cellular response to lipopolysaccharide	0.0119	1	0.0247	0.219	3	TGFB1,AKT1,TNF
GO: Biological Process	GO:0051701	interaction with host	0.0123	1	0.0254	0.225	3	TGFB1,MYC,MMP9
GO: Biological Process	GO:0071478	cellular response to radiation	0.0123	1	0.0254	0.225	3	MYC,MDM2,PTGS2
GO: Biological Process	GO:0006367	transcription initiation from RNA polymerase II promoter	0.0129	1	0.0266	0.235	3	ESR1,ESR2,PGR
GO: Biological Process	GO:0071219	cellular response to molecule of bacterial origin	0.0133	1	0.0272	0.241	3	TGFB1,AKT1,TNF
GO: Biological Process	GO:0050731	positive regulation of peptidyl-tyrosine phosphorylation	0.0133	1	0.0272	0.241	3	TGFB1,IGF2,CD44
GO: Biological Process	GO:0031345	negative regulation of cell projection organization	0.0137	1	0.0274	0.242	3	SPP1,PTEN,MDM2
GO: Biological Process	GO:0002440	production of molecular mediator of immune response	0.0137	1	0.0274	0.242	3	TGFB1,TNF,MSH2
GO: Biological Process	GO:0035264	multicellular organism growth	0.0139	1	0.0274	0.242	3	IGF2,BCL2,FGFR2
GO: Biological Process	GO:1903052	positive regulation of proteolysis involved in cellular protein catabolic process	0.0139	1	0.0274	0.242	3	AKT1,PTEN,MDM2
GO: Biological Process	GO:0055001	muscle cell development	0.0141	1	0.0278	0.245	3	MET,BCL2,SDC1
GO: Biological Process	GO:0043123	positive regulation of I-kappaB kinase/NF-kappaB signaling	0.0141	1	0.0278	0.245	3	TNF,CTNNB1,PTGS2
GO: Biological Process	GO:0002703	regulation of leukocyte mediated immunity	0.0147	1	0.0288	0.255	3	TGFB1,IGF2,TNF
GO: Biological Process	GO:1901136	carbohydrate derivative catabolic process	0.0147	1	0.0288	0.255	3	TGFB1,CD44,SDC1
GO: Biological Process	GO:1903035	negative regulation of response to wounding	0.0149	1	0.0292	0.258	3	SPP1,CD44,PTEN
GO: Biological Process	GO:0050770	regulation of axonogenesis	0.0156	1	0.0302	0.267	3	BRAF,SPP1,PTEN
GO: Biological Process	GO:0072655	establishment of protein localization to mitochondrion	0.0156	1	0.0302	0.267	3	CDKN2A,AKT1,BCL2
GO: Biological Process	GO:0051168	nuclear export	0.0156	1	0.0302	0.267	3	TGFB1,CDKN2A,MDM2
GO: Biological Process	GO:0061136	regulation of proteasomal protein catabolic process	0.0158	1	0.0307	0.271	3	APC,AKT1,MDM2
GO: Biological Process	GO:1903708	positive regulation of hemopoiesis	0.0162	1	0.0312	0.276	3	TGFB1,TNF,MMP14
GO: Biological Process	GO:0070585	protein localization to mitochondrion	0.0167	1	0.0313	0.276	3	CDKN2A,AKT1,BCL2
GO: Biological Process	GO:1903364	positive regulation of cellular protein catabolic process	0.0169	1	0.0316	0.279	3	AKT1,PTEN,MDM2
GO: Biological Process	GO:0051495	positive regulation of cytoskeleton organization	0.0172	1	0.032	0.283	3	CDKN1B,BRAF,APC
GO: Biological Process	GO:0071216	cellular response to biotic stimulus	0.0179	1	0.0332	0.293	3	TGFB1,AKT1,TNF
GO: Biological Process	GO:0008361	regulation of cell size	0.0181	1	0.0336	0.297	3	SPP1,AKT1,PTEN
GO: Biological Process	GO:0021953	central nervous system neuron differentiation	0.0183	1	0.034	0.3	3	FGFR2,CTNNB1,PTEN
GO: Biological Process	GO:0009913	epidermal cell differentiation	0.0183	1	0.034	0.3	3	CTNNB1,EZH2,PTGS2
GO: Biological Process	GO:0032845	negative regulation of homeostatic process	0.0193	1	0.0351	0.311	3	TGFB1,CD44,BCL2
GO: Biological Process	GO:0009749	response to glucose	0.0193	1	0.0351	0.311	3	TGFB1,CDKN1B,PTEN
GO: Biological Process	GO:0016051	carbohydrate biosynthetic process	0.0235	1	0.0413	0.365	3	TGFB1,IGF2,AKT1
GO: Biological Process	GO:0090092	regulation of transmembrane receptor protein serine/threonine kinase signaling pathway	0.0241	1	0.0421	0.372	3	TGFB1,CYR61,GDF15
GO: Biological Process	GO:0009952	anterior/posterior pattern specification	0.0246	1	0.0426	0.377	3	WT1,APC,CTNNB1
GO: Biological Process	GO:0000819	sister chromatid segregation	0.0249	1	0.0427	0.378	3	PTTG1,APC,CTNNB1
GO: Biological Process	GO:0030100	regulation of endocytosis	0.0252	1	0.0431	0.381	3	TGFB1,TNF,PTEN
GO: Biological Process	GO:0045665	negative regulation of neuron differentiation	0.0255	1	0.0436	0.386	3	SPP1,PTEN,MDM2
GO: Biological Process	GO:0071560	cellular response to transforming growth factor beta stimulus	0.0264	1	0.0449	0.397	3	TGFB1,GDF15,DNMT1
GO: Biological Process	GO:0050870	positive regulation of T cell activation	0.0267	1	0.0453	0.401	3	TGFB1,IGF2,AKT1
GO: Biological Process	GO:0016358	dendrite development	0.0291	1	0.0486	0.43	3	MET,PTEN,EZH2
GO: Biological Process	GO:0007411	axon guidance	0.0294	1	0.0491	0.434	3	KRAS,ERBB2,RUNX3
GO: Biological Process	GO:0097485	neuron projection guidance	0.0297	1	0.0496	0.439	3	KRAS,ERBB2,RUNX3
GO: Biological Process	GO:0046034	ATP metabolic process	0.03	1	0.0498	0.44	3	TGFB1,MYC,MSH2
GO: Biological Process	GO:0001818	negative regulation of cytokine production	0.0304	1	0.0499	0.441	3	TGFB1,MET,TNF
GO: Cellular Component	GO:0016342	catenin complex	1.59e-06	0.000474	0.000119	0.000744	3	APC,CTNNB1,CDH1
GO: Cellular Component	GO:0016328	lateral plasma membrane	0.000407	0.121	0.00337	0.0212	3	APC,CTNNB1,CDH1
GO: Cellular Component	GO:0000792	heterochromatin	0.00173	0.515	0.00953	0.0598	3	CDKN2A,IGFBP3,DNMT1
GO: Cellular Component	GO:0005902	microvillus	0.00184	0.549	0.00981	0.0616	3	TGFB1,ERBB2,CTNNB1
GO: Cellular Component	GO:0005901	caveola	0.00229	0.682	0.0116	0.0725	3	CTNNB1,CDH1,PTGS2
GO: Cellular Component	GO:0005796	Golgi lumen	0.00229	0.682	0.0116	0.0725	3	TGFB1,MMP14,SDC1
GO: Cellular Component	GO:0044853	plasma membrane raft	0.00295	0.879	0.0135	0.0849	3	CTNNB1,CDH1,PTGS2
GO: Cellular Component	GO:0005604	basement membrane	0.00328	0.977	0.0141	0.0882	3	SPARC,TIMP1,TIMP3
GO: Cellular Component	GO:0043296	apical junction complex	0.00549	1	0.0194	0.122	3	APC,CTNNB1,CDH1
GO: Cellular Component	GO:0044420	extracellular matrix component	0.00672	1	0.0228	0.143	3	SPARC,TIMP1,TIMP3
GO: Cellular Component	GO:0043204	perikaryon	0.00685	1	0.0229	0.144	3	ESR1,ESR2,PGR
GO: Cellular Component	GO:0009898	cytoplasmic side of plasma membrane	0.011	1	0.0322	0.202	3	KRAS,PTEN,CDH1
GO: Cellular Component	GO:0032993	protein-DNA complex	0.0136	1	0.038	0.238	3	ESR2,CTNNB1,TERT
GO: Cellular Component	GO:0098562	cytoplasmic side of membrane	0.0138	1	0.0382	0.24	3	KRAS,PTEN,CDH1
GO: Cellular Component	GO:0043679	axon terminus	0.0142	1	0.0384	0.241	3	ESR1,CDH1,PGR
GO: Cellular Component	GO:0030027	lamellipodium	0.0142	1	0.0384	0.241	3	APC,CTNNB1,CDH1
GO: Cellular Component	GO:0098858	actin-based cell projection	0.0182	1	0.0467	0.293	3	TGFB1,ERBB2,CTNNB1
GO: Molecular Function	GO:0038052	RNA polymerase II transcription factor activity, estrogen-activated sequence-specific DNA binding	7.64e-06	0.00291	0.000224	0.00146	2	ESR1,ESR2
GO: Molecular Function	GO:0034056	estrogen response element binding	4.55e-05	0.0174	0.000736	0.0048	2	ESR1,ESR2
GO: Molecular Function	GO:0030284	estrogen receptor activity	7.58e-05	0.0289	0.00115	0.00753	2	ESR1,ESR2
GO: Molecular Function	GO:0005114	type II transforming growth factor beta receptor binding	0.000211	0.0804	0.00189	0.0123	2	TGFB1,CD44
GO: Molecular Function	GO:0004716	signal transducer, downstream of receptor, with protein tyrosine kinase activity	0.000338	0.129	0.0028	0.0183	2	ERBB2,EGFR
GO: Molecular Function	GO:0045294	alpha-catenin binding	0.000412	0.157	0.00314	0.0205	2	CTNNB1,CDH1
GO: Molecular Function	GO:0004861	cyclin-dependent protein serine/threonine kinase inhibitor activity	0.000494	0.188	0.00362	0.0236	2	CDKN1B,CDKN2A
GO: Molecular Function	GO:0045295	gamma-catenin binding	0.000583	0.222	0.0039	0.0255	2	APC,CDH1
GO: Molecular Function	GO:0001223	transcription coactivator binding	0.000583	0.222	0.0039	0.0255	2	ESR1,TERT
GO: Molecular Function	GO:0008191	metalloendopeptidase inhibitor activity	0.000678	0.259	0.00436	0.0285	2	TIMP1,TIMP3
GO: Molecular Function	GO:1990841	promoter-specific chromatin binding	0.00101	0.384	0.0061	0.0398	2	EZH2,DNMT1
GO: Molecular Function	GO:0032794	GTPase activating protein binding	0.00113	0.432	0.00635	0.0414	2	AKT1,CDH1
GO: Molecular Function	GO:0042975	peroxisome proliferator activated receptor binding	0.00126	0.481	0.00688	0.0448	2	ESR2,MDM2
GO: Molecular Function	GO:0043539	protein serine/threonine kinase activator activity	0.00155	0.589	0.00796	0.0519	2	TGFB1,IGF2
GO: Molecular Function	GO:0019789	SUMO transferase activity	0.00219	0.836	0.0103	0.0673	2	CDKN2A,MDM2
GO: Molecular Function	GO:0005520	insulin-like growth factor binding	0.00275	1	0.0122	0.0798	2	IGFBP3,CYR61
GO: Molecular Function	GO:0001221	transcription cofactor binding	0.00315	1	0.0129	0.0842	2	ESR1,TERT
GO: Molecular Function	GO:0004709	MAP kinase kinase kinase activity	0.00315	1	0.0129	0.0842	2	BRAF,EGFR
GO: Molecular Function	GO:0030291	protein serine/threonine kinase inhibitor activity	0.00315	1	0.0129	0.0842	2	CDKN1B,CDKN2A
GO: Molecular Function	GO:0051721	protein phosphatase 2A binding	0.00427	1	0.0163	0.106	2	AKT1,BCL2
GO: Molecular Function	GO:0043548	phosphatidylinositol 3-kinase binding	0.00502	1	0.0186	0.121	2	MET,ESR1
GO: Molecular Function	GO:0016504	peptidase activator activity	0.00639	1	0.021	0.137	2	CDKN1B,MMP14
GO: Molecular Function	GO:0035254	glutamate receptor binding	0.00729	1	0.0237	0.155	2	ESR1,CTNNB1
GO: Molecular Function	GO:0030331	estrogen receptor binding	0.0076	1	0.0244	0.159	2	CTNNB1,DNMT1
GO: Molecular Function	GO:0030545	receptor regulator activity	0.0089	1	0.0257	0.168	2	IGF2,ESR2
GO: Molecular Function	GO:0070491	repressing transcription factor binding	0.0122	1	0.0324	0.211	2	MYC,CTNNB1
GO: Molecular Function	GO:0003684	damaged DNA binding	0.0142	1	0.0348	0.227	2	BRCA1,MSH2
GO: Molecular Function	GO:0000979	RNA polymerase II core promoter sequence-specific DNA binding	0.0146	1	0.0356	0.232	2	MYC,EZH2
GO: Molecular Function	GO:0002039	p53 binding	0.0172	1	0.0407	0.265	2	CDKN2A,MDM2
GO: Molecular Function	GO:0046332	SMAD binding	0.0195	1	0.0455	0.297	2	CTNNB1,RUNX3
GO: Molecular Function	GO:0030295	protein kinase activator activity	0.02	1	0.0461	0.301	2	TGFB1,IGF2
GO: Biological Process	GO:1904173	regulation of histone demethylase activity (H3-K4 specific)	7.67e-06	0.0298	4.79e-05	0.000424	2	CTNNB1,TERT
GO: Biological Process	GO:1903984	positive regulation of TRAIL-activated apoptotic signaling pathway	2.29e-05	0.089	0.000127	0.00112	2	TIMP3,PTEN
GO: Biological Process	GO:0044337	canonical Wnt signaling pathway involved in positive regulation of apoptotic process	2.29e-05	0.089	0.000127	0.00112	2	MYC,APC
GO: Biological Process	GO:0071460	cellular response to cell-matrix adhesion	2.29e-05	0.089	0.000127	0.00112	2	MMP9,SKP2
GO: Biological Process	GO:0060523	prostate epithelial cord elongation	2.29e-05	0.089	0.000127	0.00112	2	ESR1,FGFR2
GO: Biological Process	GO:0060737	prostate gland morphogenetic growth	4.57e-05	0.178	0.000235	0.00208	2	ESR1,FGFR2
GO: Biological Process	GO:0060066	oviduct development	4.57e-05	0.178	0.000235	0.00208	2	CTNNB1,CDH1
GO: Biological Process	GO:1903121	regulation of TRAIL-activated apoptotic signaling pathway	4.57e-05	0.178	0.000235	0.00208	2	TIMP3,PTEN
GO: Biological Process	GO:0060916	mesenchymal cell proliferation involved in lung development	7.61e-05	0.296	0.00037	0.00327	2	FGFR2,CTNNB1
GO: Biological Process	GO:0033088	negative regulation of immature T cell proliferation in thymus	7.61e-05	0.296	0.00037	0.00327	2	CDKN2A,ERBB2
GO: Biological Process	GO:1903799	negative regulation of production of miRNAs involved in gene silencing by miRNA	0.000114	0.443	0.000518	0.00458	2	TGFB1,ESR1
GO: Biological Process	GO:0060751	branch elongation involved in mammary gland duct branching	0.000114	0.443	0.000518	0.00458	2	TGFB1,ESR1
GO: Biological Process	GO:0019087	transformation of host cell by virus	0.000114	0.443	0.000518	0.00458	2	MYC,MMP9
GO: Biological Process	GO:0033087	negative regulation of immature T cell proliferation	0.000114	0.443	0.000518	0.00458	2	CDKN2A,ERBB2
GO: Biological Process	GO:0060745	mammary gland branching involved in pregnancy	0.000114	0.443	0.000518	0.00458	2	ESR1,PGR
GO: Biological Process	GO:0031915	positive regulation of synaptic plasticity	0.000114	0.443	0.000518	0.00458	2	MMP9,PTGS2
GO: Biological Process	GO:0061046	regulation of branching involved in lung morphogenesis	0.000114	0.443	0.000518	0.00458	2	TNF,CTNNB1
GO: Biological Process	GO:0051045	negative regulation of membrane protein ectodomain proteolysis	0.000114	0.443	0.000518	0.00458	2	TIMP1,TIMP3
GO: Biological Process	GO:0060527	prostate epithelial cord arborization involved in prostate glandular acinus morphogenesis	0.000159	0.618	0.000688	0.00608	2	ESR1,FGFR2
GO: Biological Process	GO:0060664	epithelial cell proliferation involved in salivary gland morphogenesis	0.000159	0.618	0.000688	0.00608	2	TNF,FGFR2
GO: Biological Process	GO:0060011	Sertoli cell proliferation	0.000159	0.618	0.000688	0.00608	2	ESR1,ESR2
GO: Biological Process	GO:0036462	TRAIL-activated apoptotic signaling pathway	0.000159	0.618	0.000688	0.00608	2	TIMP3,PTEN
GO: Biological Process	GO:1904707	positive regulation of vascular smooth muscle cell proliferation	0.000159	0.618	0.000688	0.00608	2	MDM2,TERT
GO: Biological Process	GO:0060687	regulation of branching involved in prostate gland morphogenesis	0.000159	0.618	0.000688	0.00608	2	ESR1,FGFR2
GO: Biological Process	GO:0060526	prostate glandular acinus morphogenesis	0.000159	0.618	0.000688	0.00608	2	ESR1,FGFR2
GO: Biological Process	GO:0060770	negative regulation of epithelial cell proliferation involved in prostate gland development	0.000159	0.618	0.000688	0.00608	2	CDKN1B,APC
GO: Biological Process	GO:0033034	positive regulation of myeloid cell apoptotic process	0.000159	0.618	0.000688	0.00608	2	CDKN2A,CD44
GO: Biological Process	GO:2000774	positive regulation of cellular senescence	0.000212	0.823	0.000878	0.00777	2	CDKN2A,KRAS
GO: Biological Process	GO:0031642	negative regulation of myelination	0.000212	0.823	0.000878	0.00777	2	TNF,PTEN
GO: Biological Process	GO:0031659	positive regulation of cyclin-dependent protein serine/threonine kinase activity involved in G1/S transition of mitotic cell cycle	0.000212	0.823	0.000878	0.00777	2	EGFR,AKT1
GO: Biological Process	GO:0032287	peripheral nervous system myelin maintenance	0.000212	0.823	0.000878	0.00777	2	NDRG1,AKT1
GO: Biological Process	GO:0060965	negative regulation of gene silencing by miRNA	0.000212	0.823	0.000878	0.00777	2	TGFB1,ESR1
GO: Biological Process	GO:0070141	response to UV-A	0.000212	0.823	0.000878	0.00777	2	EGFR,AKT1
GO: Biological Process	GO:1904754	positive regulation of vascular associated smooth muscle cell migration	0.000212	0.823	0.000878	0.00777	2	MDM2,TERT
GO: Biological Process	GO:0033085	negative regulation of T cell differentiation in thymus	0.000272	1	0.00108	0.00959	2	CDKN2A,ERBB2
GO: Biological Process	GO:0090154	positive regulation of sphingolipid biosynthetic process	0.000272	1	0.00108	0.00959	2	CYR61,TNF
GO: Biological Process	GO:0090594	inflammatory response to wounding	0.000272	1	0.00108	0.00959	2	TGFB1,CD44
GO: Biological Process	GO:0001547	antral ovarian follicle growth	0.000272	1	0.00108	0.00959	2	CCNE1,ESR1
GO: Biological Process	GO:2000304	positive regulation of ceramide biosynthetic process	0.000272	1	0.00108	0.00959	2	CYR61,TNF
GO: Biological Process	GO:1902510	regulation of apoptotic DNA fragmentation	0.000272	1	0.00108	0.00959	2	CDKN2A,IGFBP3
GO: Biological Process	GO:0002246	wound healing involved in inflammatory response	0.000272	1	0.00108	0.00959	2	TGFB1,CD44
GO: Biological Process	GO:0048681	negative regulation of axon regeneration	0.000272	1	0.00108	0.00959	2	SPP1,PTEN
GO: Biological Process	GO:0090343	positive regulation of cell aging	0.000339	1	0.00132	0.0117	2	CDKN2A,KRAS
GO: Biological Process	GO:2000399	negative regulation of thymocyte aggregation	0.000339	1	0.00132	0.0117	2	CDKN2A,ERBB2
GO: Biological Process	GO:0034116	positive regulation of heterotypic cell-cell adhesion	0.000339	1	0.00132	0.0117	2	CD44,TNF
GO: Biological Process	GO:0033084	regulation of immature T cell proliferation in thymus	0.000339	1	0.00132	0.0117	2	CDKN2A,ERBB2
GO: Biological Process	GO:1903624	regulation of DNA catabolic process	0.000339	1	0.00132	0.0117	2	CDKN2A,IGFBP3
GO: Biological Process	GO:1904752	regulation of vascular associated smooth muscle cell migration	0.000339	1	0.00132	0.0117	2	MDM2,TERT
GO: Biological Process	GO:0072217	negative regulation of metanephros development	0.000339	1	0.00132	0.0117	2	WT1,CTNNB1
GO: Biological Process	GO:1904738	vascular associated smooth muscle cell migration	0.000339	1	0.00132	0.0117	2	MDM2,TERT
GO: Biological Process	GO:0060363	cranial suture morphogenesis	0.000339	1	0.00132	0.0117	2	TGFB1,FGFR2
GO: Biological Process	GO:0060484	lung-associated mesenchyme development	0.000414	1	0.00156	0.0138	2	FGFR2,CTNNB1
GO: Biological Process	GO:0031622	positive regulation of fever generation	0.000414	1	0.00156	0.0138	2	TNF,PTGS2
GO: Biological Process	GO:0033080	immature T cell proliferation in thymus	0.000414	1	0.00156	0.0138	2	CDKN2A,ERBB2
GO: Biological Process	GO:0072203	cell proliferation involved in metanephros development	0.000414	1	0.00156	0.0138	2	MYC,WT1
GO: Biological Process	GO:0060068	vagina development	0.000414	1	0.00156	0.0138	2	ESR1,ESR2
GO: Biological Process	GO:0070571	negative regulation of neuron projection regeneration	0.000414	1	0.00156	0.0138	2	SPP1,PTEN
GO: Biological Process	GO:0045792	negative regulation of cell size	0.000414	1	0.00156	0.0138	2	AKT1,PTEN
GO: Biological Process	GO:2000773	negative regulation of cellular senescence	0.000414	1	0.00156	0.0138	2	TERT,CDK6
GO: Biological Process	GO:0042635	positive regulation of hair cycle	0.000414	1	0.00156	0.0138	2	TNF,TERT
GO: Biological Process	GO:0051573	negative regulation of histone H3-K9 methylation	0.000496	1	0.00182	0.0161	2	BRCA1,DNMT1
GO: Biological Process	GO:0042640	anagen	0.000496	1	0.00182	0.0161	2	AKT1,PTGS2
GO: Biological Process	GO:0060525	prostate glandular acinus development	0.000496	1	0.00182	0.0161	2	ESR1,FGFR2
GO: Biological Process	GO:0090399	replicative senescence	0.000496	1	0.00182	0.0161	2	CDKN2A,TERT
GO: Biological Process	GO:0033083	regulation of immature T cell proliferation	0.000496	1	0.00182	0.0161	2	CDKN2A,ERBB2
GO: Biological Process	GO:0031620	regulation of fever generation	0.000496	1	0.00182	0.0161	2	TNF,PTGS2
GO: Biological Process	GO:0032930	positive regulation of superoxide anion generation	0.000496	1	0.00182	0.0161	2	TGFB1,EGFR
GO: Biological Process	GO:0033079	immature T cell proliferation	0.000585	1	0.00211	0.0186	2	CDKN2A,ERBB2
GO: Biological Process	GO:1904748	regulation of apoptotic process involved in development	0.000585	1	0.00211	0.0186	2	CDKN2A,WT1
GO: Biological Process	GO:0043518	negative regulation of DNA damage response, signal transduction by p53 class mediator	0.000681	1	0.0024	0.0212	2	CD44,MDM2
GO: Biological Process	GO:2000303	regulation of ceramide biosynthetic process	0.000681	1	0.0024	0.0212	2	CYR61,TNF
GO: Biological Process	GO:0072216	positive regulation of metanephros development	0.000681	1	0.0024	0.0212	2	MYC,WT1
GO: Biological Process	GO:0031652	positive regulation of heat generation	0.000681	1	0.0024	0.0212	2	TNF,PTGS2
GO: Biological Process	GO:0001660	fever generation	0.000785	1	0.0027	0.0238	2	TNF,PTGS2
GO: Biological Process	GO:0045725	positive regulation of glycogen biosynthetic process	0.000785	1	0.0027	0.0238	2	IGF2,AKT1
GO: Biological Process	GO:0072075	metanephric mesenchyme development	0.000785	1	0.0027	0.0238	2	MYC,WT1
GO: Biological Process	GO:0090153	regulation of sphingolipid biosynthetic process	0.000785	1	0.0027	0.0238	2	CYR61,TNF
GO: Biological Process	GO:0051895	negative regulation of focal adhesion assembly	0.000785	1	0.0027	0.0238	2	PTEN,MMP14
GO: Biological Process	GO:0030214	hyaluronan catabolic process	0.000785	1	0.0027	0.0238	2	TGFB1,CD44
GO: Biological Process	GO:1905038	regulation of membrane lipid metabolic process	0.000785	1	0.0027	0.0238	2	CYR61,TNF
GO: Biological Process	GO:1901722	regulation of cell proliferation involved in kidney development	0.000785	1	0.0027	0.0238	2	MYC,WT1
GO: Biological Process	GO:1903392	negative regulation of adherens junction organization	0.000895	1	0.00301	0.0266	2	PTEN,MMP14
GO: Biological Process	GO:0050765	negative regulation of phagocytosis	0.000895	1	0.00301	0.0266	2	TGFB1,PTEN
GO: Biological Process	GO:0032928	regulation of superoxide anion generation	0.000895	1	0.00301	0.0266	2	TGFB1,EGFR
GO: Biological Process	GO:0031650	regulation of heat generation	0.000895	1	0.00301	0.0266	2	TNF,PTGS2
GO: Biological Process	GO:0071168	protein localization to chromatin	0.000895	1	0.00301	0.0266	2	ESR1,EZH2
GO: Biological Process	GO:0010224	response to UV-B	0.00101	1	0.00336	0.0297	2	BCL2,MSH2
GO: Biological Process	GO:0002363	alpha-beta T cell lineage commitment	0.00101	1	0.00336	0.0297	2	TGFB1,BCL2
GO: Biological Process	GO:0021542	dentate gyrus development	0.00101	1	0.00336	0.0297	2	PTEN,CDK6
GO: Biological Process	GO:0060572	morphogenesis of an epithelial bud	0.00114	1	0.00369	0.0327	2	FGFR2,CTNNB1
GO: Biological Process	GO:0006349	regulation of gene expression by genetic imprinting	0.00114	1	0.00369	0.0327	2	IGF2,BRCA1
GO: Biological Process	GO:0030540	female genitalia development	0.00114	1	0.00369	0.0327	2	ESR1,ESR2
GO: Biological Process	GO:0043369	CD4-positive or CD8-positive, alpha-beta T cell lineage commitment	0.00114	1	0.00369	0.0327	2	TGFB1,BCL2
GO: Biological Process	GO:0044851	hair cycle phase	0.00114	1	0.00369	0.0327	2	AKT1,PTGS2
GO: Biological Process	GO:0070875	positive regulation of glycogen metabolic process	0.00114	1	0.00369	0.0327	2	IGF2,AKT1
GO: Biological Process	GO:0003181	atrioventricular valve morphogenesis	0.00127	1	0.00404	0.0358	2	CYR61,MDM2
GO: Biological Process	GO:0046852	positive regulation of bone remodeling	0.00127	1	0.00404	0.0358	2	EGFR,SPP1
GO: Biological Process	GO:0034114	regulation of heterotypic cell-cell adhesion	0.00127	1	0.00404	0.0358	2	CD44,TNF
GO: Biological Process	GO:0090185	negative regulation of kidney development	0.00127	1	0.00404	0.0358	2	WT1,CTNNB1
GO: Biological Process	GO:0031645	negative regulation of neurological system process	0.00127	1	0.00404	0.0358	2	TNF,PTEN
GO: Biological Process	GO:0072074	kidney mesenchyme development	0.00127	1	0.00404	0.0358	2	MYC,WT1
GO: Biological Process	GO:0002070	epithelial cell maturation	0.00127	1	0.00404	0.0358	2	ESR2,PGR
GO: Biological Process	GO:0060231	mesenchymal to epithelial transition	0.00127	1	0.00404	0.0358	2	WT1,CTNNB1
GO: Biological Process	GO:0045780	positive regulation of bone resorption	0.00127	1	0.00404	0.0358	2	EGFR,SPP1
GO: Biological Process	GO:1902043	positive regulation of extrinsic apoptotic signaling pathway via death domain receptors	0.00127	1	0.00404	0.0358	2	TIMP3,PTEN
GO: Biological Process	GO:0031116	positive regulation of microtubule polymerization	0.00127	1	0.00404	0.0358	2	CDKN1B,APC
GO: Biological Process	GO:0031061	negative regulation of histone methylation	0.00141	1	0.00443	0.0391	2	BRCA1,DNMT1
GO: Biological Process	GO:0071157	negative regulation of cell cycle arrest	0.00141	1	0.00443	0.0391	2	RASSF1,MDM2
GO: Biological Process	GO:0048820	hair follicle maturation	0.00141	1	0.00443	0.0391	2	AKT1,PTGS2
GO: Biological Process	GO:0071498	cellular response to fluid shear stress	0.00155	1	0.00484	0.0428	2	SPP1,PTGS2
GO: Biological Process	GO:0003283	atrial septum development	0.00155	1	0.00484	0.0428	2	CYR61,MDM2
GO: Biological Process	GO:0010288	response to lead ion	0.00155	1	0.00484	0.0428	2	SPARC,DNMT1
GO: Biological Process	GO:0010661	positive regulation of muscle cell apoptotic process	0.00155	1	0.00484	0.0428	2	CDKN2A,IGFBP3
GO: Biological Process	GO:0010523	negative regulation of calcium ion transport into cytosol	0.00155	1	0.00484	0.0428	2	TGFB1,BCL2
GO: Biological Process	GO:0060716	labyrinthine layer blood vessel development	0.0017	1	0.00525	0.0464	2	CYR61,AKT1
GO: Biological Process	GO:0072111	cell proliferation involved in kidney development	0.0017	1	0.00525	0.0464	2	MYC,WT1
GO: Biological Process	GO:0031649	heat generation	0.0017	1	0.00525	0.0464	2	TNF,PTGS2
GO: Biological Process	GO:0006309	apoptotic DNA fragmentation	0.0017	1	0.00525	0.0464	2	CDKN2A,IGFBP3
GO: Biological Process	GO:0045589	regulation of regulatory T cell differentiation	0.0017	1	0.00525	0.0464	2	TGFB1,CD44
GO: Biological Process	GO:0044030	regulation of DNA methylation	0.0017	1	0.00525	0.0464	2	BRCA1,DNMT1
GO: Biological Process	GO:0051150	regulation of smooth muscle cell differentiation	0.0017	1	0.00525	0.0464	2	TGFB1,FGFR2
GO: Biological Process	GO:1904886	beta-catenin destruction complex disassembly	0.0017	1	0.00525	0.0464	2	APC,CTNNB1
GO: Biological Process	GO:0051570	regulation of histone H3-K9 methylation	0.0017	1	0.00525	0.0464	2	BRCA1,DNMT1
GO: Biological Process	GO:0003171	atrioventricular valve development	0.0017	1	0.00525	0.0464	2	CYR61,MDM2
GO: Biological Process	GO:0044849	estrous cycle	0.0017	1	0.00525	0.0464	2	ERBB2,ESR2
GO: Biological Process	GO:0050995	negative regulation of lipid catabolic process	0.00186	1	0.00568	0.0502	2	AKT1,TNF
GO: Biological Process	GO:0006925	inflammatory cell apoptotic process	0.00186	1	0.00568	0.0502	2	CDKN2A,CD44
GO: Biological Process	GO:0002719	negative regulation of cytokine production involved in immune response	0.00186	1	0.00568	0.0502	2	TGFB1,TNF
GO: Biological Process	GO:0048485	sympathetic nervous system development	0.00186	1	0.00568	0.0502	2	ERBB2,CTNNB1
GO: Biological Process	GO:0010893	positive regulation of steroid biosynthetic process	0.00203	1	0.00611	0.054	2	IGF2,TNF
GO: Biological Process	GO:0002360	T cell lineage commitment	0.00203	1	0.00611	0.054	2	TGFB1,BCL2
GO: Biological Process	GO:0051968	positive regulation of synaptic transmission, glutamatergic	0.00203	1	0.00611	0.054	2	EGFR,PTGS2
GO: Biological Process	GO:0032292	peripheral nervous system axon ensheathment	0.00203	1	0.00611	0.054	2	NDRG1,AKT1
GO: Biological Process	GO:0032891	negative regulation of organic acid transport	0.00203	1	0.00611	0.054	2	AKT1,TNF
GO: Biological Process	GO:0031112	positive regulation of microtubule polymerization or depolymerization	0.00203	1	0.00611	0.054	2	CDKN1B,APC
GO: Biological Process	GO:0022011	myelination in peripheral nervous system	0.00203	1	0.00611	0.054	2	NDRG1,AKT1
GO: Biological Process	GO:0051882	mitochondrial depolarization	0.00203	1	0.00611	0.054	2	CDKN2A,BCL2
GO: Biological Process	GO:0048103	somatic stem cell division	0.00203	1	0.00611	0.054	2	CDKN2A,FGFR2
GO: Biological Process	GO:0033233	regulation of protein sumoylation	0.0022	1	0.00655	0.058	2	CDKN2A,CTNNB1
GO: Biological Process	GO:0006359	regulation of transcription by RNA polymerase III	0.0022	1	0.00655	0.058	2	ERBB2,BRCA1
GO: Biological Process	GO:0061213	positive regulation of mesonephros development	0.0022	1	0.00655	0.058	2	TGFB1,WT1
GO: Biological Process	GO:0045066	regulatory T cell differentiation	0.0022	1	0.00655	0.058	2	TGFB1,CD44
GO: Biological Process	GO:0060713	labyrinthine layer morphogenesis	0.0022	1	0.00655	0.058	2	CYR61,FGFR2
GO: Biological Process	GO:0030539	male genitalia development	0.0022	1	0.00655	0.058	2	WT1,CTNNB1
GO: Biological Process	GO:0042634	regulation of hair cycle	0.0022	1	0.00655	0.058	2	TNF,TERT
GO: Biological Process	GO:0003203	endocardial cushion morphogenesis	0.0022	1	0.00655	0.058	2	TGFB1,MDM2
GO: Biological Process	GO:0071634	regulation of transforming growth factor beta production	0.00238	1	0.00702	0.0621	2	MET,PTGS2
GO: Biological Process	GO:0048643	positive regulation of skeletal muscle tissue development	0.00238	1	0.00702	0.0621	2	BCL2,CTNNB1
GO: Biological Process	GO:0000737	DNA catabolic process, endonucleolytic	0.00238	1	0.00702	0.0621	2	CDKN2A,IGFBP3
GO: Biological Process	GO:0072273	metanephric nephron morphogenesis	0.00238	1	0.00702	0.0621	2	WT1,CTNNB1
GO: Biological Process	GO:0045662	negative regulation of myoblast differentiation	0.00238	1	0.00702	0.0621	2	TGFB1,TNF
GO: Biological Process	GO:0071364	cellular response to epidermal growth factor stimulus	0.00257	1	0.00749	0.0663	2	EGFR,AKT1
GO: Biological Process	GO:1900117	regulation of execution phase of apoptosis	0.00257	1	0.00749	0.0663	2	CDKN2A,IGFBP3
GO: Biological Process	GO:0060251	regulation of glial cell proliferation	0.00257	1	0.00749	0.0663	2	MYC,TERT
GO: Biological Process	GO:0071604	transforming growth factor beta production	0.00257	1	0.00749	0.0663	2	MET,PTGS2
GO: Biological Process	GO:0042346	positive regulation of NF-kappaB import into nucleus	0.00257	1	0.00749	0.0663	2	TNF,PTGS2
GO: Biological Process	GO:0014044	Schwann cell development	0.00276	1	0.00787	0.0696	2	NDRG1,AKT1
GO: Biological Process	GO:0030728	ovulation	0.00276	1	0.00787	0.0696	2	PTGS2,PGR
GO: Biological Process	GO:0061217	regulation of mesonephros development	0.00276	1	0.00787	0.0696	2	TGFB1,WT1
GO: Biological Process	GO:0060977	coronary vasculature morphogenesis	0.00276	1	0.00787	0.0696	2	FGFR2,CTNNB1
GO: Biological Process	GO:0060669	embryonic placenta morphogenesis	0.00276	1	0.00787	0.0696	2	CYR61,FGFR2
GO: Biological Process	GO:1900087	positive regulation of G1/S transition of mitotic cell cycle	0.00276	1	0.00787	0.0696	2	MDM2,TERT
GO: Biological Process	GO:0042554	superoxide anion generation	0.00276	1	0.00787	0.0696	2	TGFB1,EGFR
GO: Biological Process	GO:0044705	multi-organism reproductive behavior	0.00296	1	0.00825	0.0729	2	PTEN,PGR
GO: Biological Process	GO:0010800	positive regulation of peptidyl-threonine phosphorylation	0.00296	1	0.00825	0.0729	2	TGFB1,MET
GO: Biological Process	GO:2000352	negative regulation of endothelial cell apoptotic process	0.00296	1	0.00825	0.0729	2	BRAF,TERT
GO: Biological Process	GO:0071514	genetic imprinting	0.00296	1	0.00825	0.0729	2	IGF2,BRCA1
GO: Biological Process	GO:0007617	mating behavior	0.00296	1	0.00825	0.0729	2	PTEN,PGR
GO: Biological Process	GO:0005979	regulation of glycogen biosynthetic process	0.00316	1	0.00871	0.077	2	IGF2,AKT1
GO: Biological Process	GO:1901797	negative regulation of signal transduction by p53 class mediator	0.00316	1	0.00871	0.077	2	CD44,MDM2
GO: Biological Process	GO:0035411	catenin import into nucleus	0.00316	1	0.00871	0.077	2	EGFR,CTNNB1
GO: Biological Process	GO:0042481	regulation of odontogenesis	0.00316	1	0.00871	0.077	2	TGFB1,APC
GO: Biological Process	GO:0060561	apoptotic process involved in morphogenesis	0.00316	1	0.00871	0.077	2	CDKN2A,CYR61
GO: Biological Process	GO:0010962	regulation of glucan biosynthetic process	0.00316	1	0.00871	0.077	2	IGF2,AKT1
GO: Biological Process	GO:0033598	mammary gland epithelial cell proliferation	0.00338	1	0.00924	0.0817	2	CDKN2A,ESR1
GO: Biological Process	GO:0044319	wound healing, spreading of cells	0.00338	1	0.00924	0.0817	2	CYR61,MMP12
GO: Biological Process	GO:0090505	epiboly involved in wound healing	0.00338	1	0.00924	0.0817	2	CYR61,MMP12
GO: Biological Process	GO:2000826	regulation of heart morphogenesis	0.00338	1	0.00924	0.0817	2	TGFB1,CTNNB1
GO: Biological Process	GO:0035066	positive regulation of histone acetylation	0.00338	1	0.00924	0.0817	2	TGFB1,BRCA1
GO: Biological Process	GO:0040036	regulation of fibroblast growth factor receptor signaling pathway	0.00338	1	0.00924	0.0817	2	FGFR2,CTNNB1
GO: Biological Process	GO:0045922	negative regulation of fatty acid metabolic process	0.00338	1	0.00924	0.0817	2	BRCA1,AKT1
GO: Biological Process	GO:0048147	negative regulation of fibroblast proliferation	0.0036	1	0.00969	0.0857	2	MYC,MMP9
GO: Biological Process	GO:0030262	apoptotic nuclear changes	0.0036	1	0.00969	0.0857	2	CDKN2A,IGFBP3
GO: Biological Process	GO:2000398	regulation of thymocyte aggregation	0.0036	1	0.00969	0.0857	2	CDKN2A,ERBB2
GO: Biological Process	GO:0070306	lens fiber cell differentiation	0.0036	1	0.00969	0.0857	2	TGFB1,FGFR2
GO: Biological Process	GO:0033081	regulation of T cell differentiation in thymus	0.0036	1	0.00969	0.0857	2	CDKN2A,ERBB2
GO: Biological Process	GO:0033146	regulation of intracellular estrogen receptor signaling pathway	0.0036	1	0.00969	0.0857	2	BRCA1,SKP2
GO: Biological Process	GO:0002714	positive regulation of B cell mediated immunity	0.0036	1	0.00969	0.0857	2	TGFB1,TNF
GO: Biological Process	GO:0002701	negative regulation of production of molecular mediator of immune response	0.0036	1	0.00969	0.0857	2	TGFB1,TNF
GO: Biological Process	GO:0033198	response to ATP	0.0036	1	0.00969	0.0857	2	PTEN,PTGS2
GO: Biological Process	GO:0070849	response to epidermal growth factor	0.0036	1	0.00969	0.0857	2	EGFR,AKT1
GO: Biological Process	GO:0090504	epiboly	0.0036	1	0.00969	0.0857	2	CYR61,MMP12
GO: Biological Process	GO:0002891	positive regulation of immunoglobulin mediated immune response	0.0036	1	0.00969	0.0857	2	TGFB1,TNF
GO: Biological Process	GO:1902692	regulation of neuroblast proliferation	0.0036	1	0.00969	0.0857	2	TGFB1,CTNNB1
GO: Biological Process	GO:0003179	heart valve morphogenesis	0.00382	1	0.0102	0.0903	2	CYR61,MDM2
GO: Biological Process	GO:0034698	response to gonadotropin	0.00382	1	0.0102	0.0903	2	ESR2,WT1
GO: Biological Process	GO:0033144	negative regulation of intracellular steroid hormone receptor signaling pathway	0.00382	1	0.0102	0.0903	2	BRCA1,ESR2
GO: Biological Process	GO:0051567	histone H3-K9 methylation	0.00382	1	0.0102	0.0903	2	BRCA1,DNMT1
GO: Biological Process	GO:2000758	positive regulation of peptidyl-lysine acetylation	0.00382	1	0.0102	0.0903	2	TGFB1,BRCA1
GO: Biological Process	GO:1901976	regulation of cell cycle checkpoint	0.00382	1	0.0102	0.0903	2	NDRG1,AKT1
GO: Biological Process	GO:0060674	placenta blood vessel development	0.00382	1	0.0102	0.0903	2	CYR61,AKT1
GO: Biological Process	GO:0031113	regulation of microtubule polymerization	0.00382	1	0.0102	0.0903	2	CDKN1B,APC
GO: Biological Process	GO:1902808	positive regulation of cell cycle G1/S phase transition	0.00382	1	0.0102	0.0903	2	MDM2,TERT
GO: Biological Process	GO:0003338	metanephros morphogenesis	0.00382	1	0.0102	0.0903	2	WT1,CTNNB1
GO: Biological Process	GO:0006308	DNA catabolic process	0.00405	1	0.0108	0.0952	2	CDKN2A,IGFBP3
GO: Biological Process	GO:0060043	regulation of cardiac muscle cell proliferation	0.00405	1	0.0108	0.0952	2	FGFR2,PTEN
GO: Biological Process	GO:0045601	regulation of endothelial cell differentiation	0.00405	1	0.0108	0.0952	2	TNF,CTNNB1
GO: Biological Process	GO:0045940	positive regulation of steroid metabolic process	0.00405	1	0.0108	0.0952	2	IGF2,TNF
GO: Biological Process	GO:0060421	positive regulation of heart growth	0.00405	1	0.0108	0.0952	2	WT1,FGFR2
GO: Biological Process	GO:0002675	positive regulation of acute inflammatory response	0.00429	1	0.0113	0.1	2	TNF,PTGS2
GO: Biological Process	GO:0009954	proximal/distal pattern formation	0.00429	1	0.0113	0.1	2	APC,CTNNB1
GO: Biological Process	GO:0032228	regulation of synaptic transmission, GABAergic	0.00429	1	0.0113	0.1	2	KRAS,PTEN
GO: Biological Process	GO:0014037	Schwann cell differentiation	0.00429	1	0.0113	0.1	2	NDRG1,AKT1
GO: Biological Process	GO:0003230	cardiac atrium development	0.00453	1	0.0119	0.105	2	CYR61,MDM2
GO: Biological Process	GO:0071312	cellular response to alkaloid	0.00453	1	0.0119	0.105	2	TNF,MDM2
GO: Biological Process	GO:0001782	B cell homeostasis	0.00453	1	0.0119	0.105	2	CD44,BCL2
GO: Biological Process	GO:0048873	homeostasis of number of cells within a tissue	0.00453	1	0.0119	0.105	2	KRAS,BCL2
GO: Biological Process	GO:0051385	response to mineralocorticoid	0.00453	1	0.0119	0.105	2	CCNE1,KRAS
GO: Biological Process	GO:2000816	negative regulation of mitotic sister chromatid separation	0.00453	1	0.0119	0.105	2	PTTG1,APC
GO: Biological Process	GO:0010092	specification of animal organ identity	0.00453	1	0.0119	0.105	2	FGFR2,CTNNB1
GO: Biological Process	GO:0046825	regulation of protein export from nucleus	0.00478	1	0.0125	0.11	2	CDKN2A,MDM2
GO: Biological Process	GO:0048566	embryonic digestive tract development	0.00478	1	0.0125	0.11	2	TNF,FGFR2
GO: Biological Process	GO:0010039	response to iron ion	0.00478	1	0.0125	0.11	2	BCL2,MDM2
GO: Biological Process	GO:0070873	regulation of glycogen metabolic process	0.00478	1	0.0125	0.11	2	IGF2,AKT1
GO: Biological Process	GO:0031648	protein destabilization	0.00504	1	0.0131	0.115	2	CDKN2A,MDM2
GO: Biological Process	GO:0014003	oligodendrocyte development	0.00504	1	0.0131	0.115	2	TGFB1,PTEN
GO: Biological Process	GO:1901985	positive regulation of protein acetylation	0.00504	1	0.0131	0.115	2	TGFB1,BRCA1
GO: Biological Process	GO:0035850	epithelial cell differentiation involved in kidney development	0.00504	1	0.0131	0.115	2	WT1,CTNNB1
GO: Biological Process	GO:0003197	endocardial cushion development	0.00504	1	0.0131	0.115	2	TGFB1,MDM2
GO: Biological Process	GO:0010863	positive regulation of phospholipase C activity	0.00504	1	0.0131	0.115	2	EGFR,ESR1
GO: Biological Process	GO:0033048	negative regulation of mitotic sister chromatid segregation	0.00504	1	0.0131	0.115	2	PTTG1,APC
GO: Biological Process	GO:1903202	negative regulation of oxidative stress-induced cell death	0.00504	1	0.0131	0.115	2	MET,AKT1
GO: Biological Process	GO:0055025	positive regulation of cardiac muscle tissue development	0.00504	1	0.0131	0.115	2	TGFB1,FGFR2
GO: Biological Process	GO:0003156	regulation of animal organ formation	0.0053	1	0.0136	0.12	2	WT1,CTNNB1
GO: Biological Process	GO:0042304	regulation of fatty acid biosynthetic process	0.0053	1	0.0136	0.12	2	BRCA1,PTGS2
GO: Biological Process	GO:0050974	detection of mechanical stimulus involved in sensory perception	0.0053	1	0.0136	0.12	2	MYC,TNF
GO: Biological Process	GO:1903318	negative regulation of protein maturation	0.0053	1	0.0136	0.12	2	MDM2,CDH1
GO: Biological Process	GO:0044848	biological phase	0.0053	1	0.0136	0.12	2	AKT1,PTGS2
GO: Biological Process	GO:0048009	insulin-like growth factor receptor signaling pathway	0.0053	1	0.0136	0.12	2	IGFBP3,AKT1
GO: Biological Process	GO:0010559	regulation of glycoprotein biosynthetic process	0.0053	1	0.0136	0.12	2	BCL2,CTNNB1
GO: Biological Process	GO:0060325	face morphogenesis	0.0053	1	0.0136	0.12	2	TGFB1,MMP2
GO: Biological Process	GO:0010955	negative regulation of protein processing	0.0053	1	0.0136	0.12	2	MDM2,CDH1
GO: Biological Process	GO:0000578	embryonic axis specification	0.0053	1	0.0136	0.12	2	WT1,CTNNB1
GO: Biological Process	GO:0045739	positive regulation of DNA repair	0.00557	1	0.0137	0.121	2	BRCA1,EGFR
GO: Biological Process	GO:0019098	reproductive behavior	0.00557	1	0.0137	0.121	2	PTEN,PGR
GO: Biological Process	GO:0046579	positive regulation of Ras protein signal transduction	0.00557	1	0.0137	0.121	2	KRAS,ERBB2
GO: Biological Process	GO:2000677	regulation of transcription regulatory region DNA binding	0.00557	1	0.0137	0.121	2	TGFB1,CTNNB1
GO: Biological Process	GO:0031057	negative regulation of histone modification	0.00585	1	0.0142	0.126	2	BRCA1,DNMT1
GO: Biological Process	GO:0033046	negative regulation of sister chromatid segregation	0.00585	1	0.0142	0.126	2	PTTG1,APC
GO: Biological Process	GO:0072210	metanephric nephron development	0.00585	1	0.0142	0.126	2	WT1,CTNNB1
GO: Biological Process	GO:1902883	negative regulation of response to oxidative stress	0.00585	1	0.0142	0.126	2	MET,AKT1
GO: Biological Process	GO:0003170	heart valve development	0.00585	1	0.0142	0.126	2	CYR61,MDM2
GO: Biological Process	GO:0010799	regulation of peptidyl-threonine phosphorylation	0.00585	1	0.0142	0.126	2	TGFB1,MET
GO: Biological Process	GO:0040018	positive regulation of multicellular organism growth	0.00585	1	0.0142	0.126	2	IGF2,BCL2
GO: Biological Process	GO:1900408	negative regulation of cellular response to oxidative stress	0.00585	1	0.0142	0.126	2	MET,AKT1
GO: Biological Process	GO:1900274	regulation of phospholipase C activity	0.00613	1	0.0148	0.131	2	EGFR,ESR1
GO: Biological Process	GO:0014014	negative regulation of gliogenesis	0.00613	1	0.0148	0.131	2	CTNNB1,TERT
GO: Biological Process	GO:0010907	positive regulation of glucose metabolic process	0.00613	1	0.0148	0.131	2	IGF2,AKT1
GO: Biological Process	GO:0002204	somatic recombination of immunoglobulin genes involved in immune response	0.00613	1	0.0148	0.131	2	TGFB1,MSH2
GO: Biological Process	GO:1903792	negative regulation of anion transport	0.00613	1	0.0148	0.131	2	AKT1,TNF
GO: Biological Process	GO:0002208	somatic diversification of immunoglobulins involved in immune response	0.00613	1	0.0148	0.131	2	TGFB1,MSH2
GO: Biological Process	GO:0045190	isotype switching	0.00613	1	0.0148	0.131	2	TGFB1,MSH2
GO: Biological Process	GO:0001659	temperature homeostasis	0.00642	1	0.0154	0.136	2	TNF,PTGS2
GO: Biological Process	GO:0030857	negative regulation of epithelial cell differentiation	0.00642	1	0.0154	0.136	2	CTNNB1,EZH2
GO: Biological Process	GO:1901031	regulation of response to reactive oxygen species	0.00642	1	0.0154	0.136	2	MET,TNF
GO: Biological Process	GO:0051985	negative regulation of chromosome segregation	0.00642	1	0.0154	0.136	2	PTTG1,APC
GO: Biological Process	GO:0033574	response to testosterone	0.00642	1	0.0154	0.136	2	ESR2,DNMT1
GO: Biological Process	GO:0061028	establishment of endothelial barrier	0.00642	1	0.0154	0.136	2	TNF,CTNNB1
GO: Biological Process	GO:0071548	response to dexamethasone	0.00642	1	0.0154	0.136	2	TGFB1,ESR2
GO: Biological Process	GO:0001662	behavioral fear response	0.00642	1	0.0154	0.136	2	ESR2,BCL2
GO: Biological Process	GO:0017145	stem cell division	0.00671	1	0.016	0.141	2	CDKN2A,FGFR2
GO: Biological Process	GO:0045124	regulation of bone resorption	0.00671	1	0.016	0.141	2	EGFR,SPP1
GO: Biological Process	GO:0002209	behavioral defense response	0.00671	1	0.016	0.141	2	ESR2,BCL2
GO: Biological Process	GO:1903018	regulation of glycoprotein metabolic process	0.00671	1	0.016	0.141	2	BCL2,CTNNB1
GO: Biological Process	GO:0045668	negative regulation of osteoblast differentiation	0.00671	1	0.016	0.141	2	TNF,CDK6
GO: Biological Process	GO:0048483	autonomic nervous system development	0.00701	1	0.0166	0.147	2	ERBB2,CTNNB1
GO: Biological Process	GO:0070303	negative regulation of stress-activated protein kinase signaling cascade	0.00701	1	0.0166	0.147	2	MYC,AKT1
GO: Biological Process	GO:2000351	regulation of endothelial cell apoptotic process	0.00701	1	0.0166	0.147	2	BRAF,TERT
GO: Biological Process	GO:0031577	spindle checkpoint	0.00701	1	0.0166	0.147	2	NDRG1,APC
GO: Biological Process	GO:0042771	intrinsic apoptotic signaling pathway in response to DNA damage by p53 class mediator	0.00701	1	0.0166	0.147	2	CD44,MSH2
GO: Biological Process	GO:0032873	negative regulation of stress-activated MAPK cascade	0.00701	1	0.0166	0.147	2	MYC,AKT1
GO: Biological Process	GO:0031670	cellular response to nutrient	0.00732	1	0.0172	0.152	2	CCNE1,MDM2
GO: Biological Process	GO:0061647	histone H3-K9 modification	0.00732	1	0.0172	0.152	2	BRCA1,DNMT1
GO: Biological Process	GO:0051057	positive regulation of small GTPase mediated signal transduction	0.00732	1	0.0172	0.152	2	KRAS,ERBB2
GO: Biological Process	GO:0090199	regulation of release of cytochrome c from mitochondria	0.00732	1	0.0172	0.152	2	AKT1,MMP9
GO: Biological Process	GO:0045843	negative regulation of striated muscle tissue development	0.00732	1	0.0172	0.152	2	TGFB1,PTEN
GO: Biological Process	GO:0046622	positive regulation of organ growth	0.00732	1	0.0172	0.152	2	WT1,FGFR2
GO: Biological Process	GO:0055010	ventricular cardiac muscle tissue morphogenesis	0.00732	1	0.0172	0.152	2	FGFR2,CTNNB1
GO: Biological Process	GO:0042596	fear response	0.00763	1	0.0178	0.158	2	ESR2,BCL2
GO: Biological Process	GO:0016447	somatic recombination of immunoglobulin gene segments	0.00763	1	0.0178	0.158	2	TGFB1,MSH2
GO: Biological Process	GO:0045806	negative regulation of endocytosis	0.00763	1	0.0178	0.158	2	TGFB1,PTEN
GO: Biological Process	GO:0046326	positive regulation of glucose import	0.00763	1	0.0178	0.158	2	AKT1,TERT
GO: Biological Process	GO:0008631	intrinsic apoptotic signaling pathway in response to oxidative stress	0.00795	1	0.0184	0.163	2	AKT1,BCL2
GO: Biological Process	GO:0006754	ATP biosynthetic process	0.00795	1	0.0184	0.163	2	TGFB1,MYC
GO: Biological Process	GO:0051205	protein insertion into membrane	0.00795	1	0.0184	0.163	2	EGFR,BCL2
GO: Biological Process	GO:0048599	oocyte development	0.00795	1	0.0184	0.163	2	BCL2,CTNNB1
GO: Biological Process	GO:0051932	synaptic transmission, GABAergic	0.00795	1	0.0184	0.163	2	KRAS,PTEN
GO: Biological Process	GO:2000514	regulation of CD4-positive, alpha-beta T cell activation	0.00795	1	0.0184	0.163	2	TGFB1,CD44
GO: Biological Process	GO:0034113	heterotypic cell-cell adhesion	0.00795	1	0.0184	0.163	2	CD44,TNF
GO: Biological Process	GO:0002712	regulation of B cell mediated immunity	0.00795	1	0.0184	0.163	2	TGFB1,TNF
GO: Biological Process	GO:0048635	negative regulation of muscle organ development	0.00795	1	0.0184	0.163	2	TGFB1,PTEN
GO: Biological Process	GO:0002889	regulation of immunoglobulin mediated immune response	0.00795	1	0.0184	0.163	2	TGFB1,TNF
GO: Biological Process	GO:0010862	positive regulation of pathway-restricted SMAD protein phosphorylation	0.00827	1	0.0186	0.165	2	TGFB1,GDF15
GO: Biological Process	GO:0045599	negative regulation of fat cell differentiation	0.00827	1	0.0186	0.165	2	TGFB1,TNF
GO: Biological Process	GO:0055021	regulation of cardiac muscle tissue growth	0.00827	1	0.0186	0.165	2	FGFR2,PTEN
GO: Biological Process	GO:1901862	negative regulation of muscle tissue development	0.00827	1	0.0186	0.165	2	TGFB1,PTEN
GO: Biological Process	GO:0072577	endothelial cell apoptotic process	0.00827	1	0.0186	0.165	2	BRAF,TERT
GO: Biological Process	GO:0002762	negative regulation of myeloid leukocyte differentiation	0.00827	1	0.0186	0.165	2	MYC,CTNNB1
GO: Biological Process	GO:0007528	neuromuscular junction development	0.0086	1	0.0191	0.169	2	ERBB2,FGFR2
GO: Biological Process	GO:0042345	regulation of NF-kappaB import into nucleus	0.0086	1	0.0191	0.169	2	TNF,PTGS2
GO: Biological Process	GO:0090109	regulation of cell-substrate junction assembly	0.0086	1	0.0191	0.169	2	PTEN,MMP14
GO: Biological Process	GO:0042348	NF-kappaB import into nucleus	0.0086	1	0.0191	0.169	2	TNF,PTGS2
GO: Biological Process	GO:0061005	cell differentiation involved in kidney development	0.0086	1	0.0191	0.169	2	WT1,CTNNB1
GO: Biological Process	GO:0032570	response to progesterone	0.0086	1	0.0191	0.169	2	TGFB1,CCNE1
GO: Biological Process	GO:0051893	regulation of focal adhesion assembly	0.0086	1	0.0191	0.169	2	PTEN,MMP14
GO: Biological Process	GO:0008347	glial cell migration	0.0086	1	0.0191	0.169	2	CTNNB1,MMP14
GO: Biological Process	GO:0031018	endocrine pancreas development	0.00893	1	0.0198	0.175	2	AKT1,CDK6
GO: Biological Process	GO:1903391	regulation of adherens junction organization	0.00928	1	0.0205	0.181	2	PTEN,MMP14
GO: Biological Process	GO:0021795	cerebral cortex cell migration	0.00928	1	0.0205	0.181	2	EGFR,CTNNB1
GO: Biological Process	GO:0009994	oocyte differentiation	0.00928	1	0.0205	0.181	2	BCL2,CTNNB1
GO: Biological Process	GO:0010965	regulation of mitotic sister chromatid separation	0.00928	1	0.0205	0.181	2	PTTG1,APC
GO: Biological Process	GO:2001021	negative regulation of response to DNA damage stimulus	0.00962	1	0.0211	0.187	2	CD44,MDM2
GO: Biological Process	GO:0035176	social behavior	0.00962	1	0.0211	0.187	2	KRAS,PTEN
GO: Biological Process	GO:0002381	immunoglobulin production involved in immunoglobulin mediated immune response	0.00962	1	0.0211	0.187	2	TGFB1,MSH2
GO: Biological Process	GO:0002067	glandular epithelial cell differentiation	0.00962	1	0.0211	0.187	2	FGFR2,CDK6
GO: Biological Process	GO:0007618	mating	0.00962	1	0.0211	0.187	2	PTEN,PGR
GO: Biological Process	GO:0051703	intraspecies interaction between organisms	0.00962	1	0.0211	0.187	2	KRAS,PTEN
GO: Biological Process	GO:0005978	glycogen biosynthetic process	0.00997	1	0.0218	0.193	2	IGF2,AKT1
GO: Biological Process	GO:0006301	postreplication repair	0.00997	1	0.0218	0.193	2	BRCA1,MSH2
GO: Biological Process	GO:0009250	glucan biosynthetic process	0.00997	1	0.0218	0.193	2	IGF2,AKT1
GO: Biological Process	GO:0002637	regulation of immunoglobulin production	0.00997	1	0.0218	0.193	2	TGFB1,TNF
GO: Biological Process	GO:0051306	mitotic sister chromatid separation	0.00997	1	0.0218	0.193	2	PTTG1,APC
GO: Biological Process	GO:0006383	transcription by RNA polymerase III	0.00997	1	0.0218	0.193	2	ERBB2,BRCA1
GO: Biological Process	GO:0009948	anterior/posterior axis specification	0.00997	1	0.0218	0.193	2	WT1,CTNNB1
GO: Biological Process	GO:0003229	ventricular cardiac muscle tissue development	0.00997	1	0.0218	0.193	2	FGFR2,CTNNB1
GO: Biological Process	GO:0046850	regulation of bone remodeling	0.0103	1	0.0225	0.199	2	EGFR,SPP1
GO: Biological Process	GO:0016445	somatic diversification of immunoglobulins	0.0103	1	0.0225	0.199	2	TGFB1,MSH2
GO: Biological Process	GO:1903201	regulation of oxidative stress-induced cell death	0.0103	1	0.0225	0.199	2	MET,AKT1
GO: Biological Process	GO:0042220	response to cocaine	0.0103	1	0.0225	0.199	2	MDM2,PGR
GO: Biological Process	GO:0045600	positive regulation of fat cell differentiation	0.0107	1	0.0232	0.205	2	AKT1,PTGS2
GO: Biological Process	GO:0006953	acute-phase response	0.0107	1	0.0232	0.205	2	TNF,PTGS2
GO: Biological Process	GO:0010332	response to gamma radiation	0.0107	1	0.0232	0.205	2	MYC,BCL2
GO: Biological Process	GO:0002011	morphogenesis of an epithelial sheet	0.0107	1	0.0232	0.205	2	CYR61,MMP12
GO: Biological Process	GO:0046513	ceramide biosynthetic process	0.0107	1	0.0232	0.205	2	CYR61,TNF
GO: Biological Process	GO:0007004	telomere maintenance via telomerase	0.0107	1	0.0232	0.205	2	CTNNB1,TERT
GO: Biological Process	GO:0035065	regulation of histone acetylation	0.0107	1	0.0232	0.205	2	TGFB1,BRCA1
GO: Biological Process	GO:0000186	activation of MAPKK activity	0.0111	1	0.0233	0.206	2	BRAF,EGFR
GO: Biological Process	GO:0050994	regulation of lipid catabolic process	0.0111	1	0.0233	0.206	2	AKT1,TNF
GO: Biological Process	GO:0050982	detection of mechanical stimulus	0.0111	1	0.0233	0.206	2	MYC,TNF
GO: Biological Process	GO:0046785	microtubule polymerization	0.0114	1	0.0238	0.211	2	CDKN1B,APC
GO: Biological Process	GO:0048286	lung alveolus development	0.0114	1	0.0238	0.211	2	FGFR2,PGR
GO: Biological Process	GO:0033047	regulation of mitotic sister chromatid segregation	0.0114	1	0.0238	0.211	2	PTTG1,APC
GO: Biological Process	GO:0001974	blood vessel remodeling	0.0114	1	0.0238	0.211	2	TGFB1,MDM2
GO: Biological Process	GO:0009206	purine ribonucleoside triphosphate biosynthetic process	0.0118	1	0.0246	0.217	2	TGFB1,MYC
GO: Biological Process	GO:0051966	regulation of synaptic transmission, glutamatergic	0.0118	1	0.0246	0.217	2	EGFR,PTGS2
GO: Biological Process	GO:0000768	syncytium formation by plasma membrane fusion	0.0118	1	0.0246	0.217	2	GDF15,CD44
GO: Biological Process	GO:0030888	regulation of B cell proliferation	0.0118	1	0.0246	0.217	2	CDKN2A,BCL2
GO: Biological Process	GO:0009145	purine nucleoside triphosphate biosynthetic process	0.0122	1	0.0253	0.224	2	TGFB1,MYC
GO: Biological Process	GO:0002562	somatic diversification of immune receptors via germline recombination within a single locus	0.0122	1	0.0253	0.224	2	TGFB1,MSH2
GO: Biological Process	GO:0016444	somatic cell DNA recombination	0.0122	1	0.0253	0.224	2	TGFB1,MSH2
GO: Biological Process	GO:0031110	regulation of microtubule polymerization or depolymerization	0.0126	1	0.026	0.23	2	CDKN1B,APC
GO: Biological Process	GO:0060393	regulation of pathway-restricted SMAD protein phosphorylation	0.0126	1	0.026	0.23	2	TGFB1,GDF15
GO: Biological Process	GO:0042246	tissue regeneration	0.0126	1	0.026	0.23	2	TIMP3,EZH2
GO: Biological Process	GO:0000018	regulation of DNA recombination	0.013	1	0.0267	0.236	2	TGFB1,MSH2
GO: Biological Process	GO:0070373	negative regulation of ERK1 and ERK2 cascade	0.013	1	0.0267	0.236	2	TIMP3,PTEN
GO: Biological Process	GO:0008542	visual learning	0.013	1	0.0267	0.236	2	KRAS,BRAF
GO: Biological Process	GO:2000756	regulation of peptidyl-lysine acetylation	0.013	1	0.0267	0.236	2	TGFB1,BRCA1
GO: Biological Process	GO:2000573	positive regulation of DNA biosynthetic process	0.013	1	0.0267	0.236	2	MYC,CTNNB1
GO: Biological Process	GO:0002066	columnar/cuboidal epithelial cell development	0.013	1	0.0267	0.236	2	CDH1,CDK6
GO: Biological Process	GO:0006977	DNA damage response, signal transduction by p53 class mediator resulting in cell cycle arrest	0.013	1	0.0267	0.236	2	CDKN1B,MDM2
GO: Biological Process	GO:2000243	positive regulation of reproductive process	0.0134	1	0.0274	0.242	2	WT1,CTNNB1
GO: Biological Process	GO:0060395	SMAD protein signal transduction	0.0134	1	0.0274	0.242	2	TGFB1,GDF15
GO: Biological Process	GO:0055008	cardiac muscle tissue morphogenesis	0.0134	1	0.0274	0.242	2	FGFR2,CTNNB1
GO: Biological Process	GO:0072431	signal transduction involved in mitotic G1 DNA damage checkpoint	0.0134	1	0.0274	0.242	2	CDKN1B,MDM2
GO: Biological Process	GO:1902400	intracellular signal transduction involved in G1 DNA damage checkpoint	0.0134	1	0.0274	0.242	2	CDKN1B,MDM2
GO: Biological Process	GO:0006949	syncytium formation	0.0134	1	0.0274	0.242	2	GDF15,CD44
GO: Biological Process	GO:1902403	signal transduction involved in mitotic DNA integrity checkpoint	0.0138	1	0.0274	0.242	2	CDKN1B,MDM2
GO: Biological Process	GO:0032835	glomerulus development	0.0138	1	0.0274	0.242	2	WT1,BCL2
GO: Biological Process	GO:0060389	pathway-restricted SMAD protein phosphorylation	0.0138	1	0.0274	0.242	2	TGFB1,GDF15
GO: Biological Process	GO:1902402	signal transduction involved in mitotic DNA damage checkpoint	0.0138	1	0.0274	0.242	2	CDKN1B,MDM2
GO: Biological Process	GO:0002718	regulation of cytokine production involved in immune response	0.0138	1	0.0274	0.242	2	TGFB1,TNF
GO: Biological Process	GO:0072413	signal transduction involved in mitotic cell cycle checkpoint	0.0138	1	0.0274	0.242	2	CDKN1B,MDM2
GO: Biological Process	GO:0002312	B cell activation involved in immune response	0.0142	1	0.0279	0.247	2	TGFB1,MSH2
GO: Biological Process	GO:0050810	regulation of steroid biosynthetic process	0.0142	1	0.0279	0.247	2	IGF2,TNF
GO: Biological Process	GO:0009201	ribonucleoside triphosphate biosynthetic process	0.0142	1	0.0279	0.247	2	TGFB1,MYC
GO: Biological Process	GO:0060291	long-term synaptic potentiation	0.0142	1	0.0279	0.247	2	BRAF,PTEN
GO: Biological Process	GO:0006278	RNA-dependent DNA biosynthetic process	0.0142	1	0.0279	0.247	2	CTNNB1,TERT
GO: Biological Process	GO:0010660	regulation of muscle cell apoptotic process	0.0142	1	0.0279	0.247	2	CDKN2A,IGFBP3
GO: Biological Process	GO:0010833	telomere maintenance via telomere lengthening	0.0146	1	0.0287	0.254	2	CTNNB1,TERT
GO: Biological Process	GO:0043367	CD4-positive, alpha-beta T cell differentiation	0.0146	1	0.0287	0.254	2	TGFB1,BRAF
GO: Biological Process	GO:0072401	signal transduction involved in DNA integrity checkpoint	0.0146	1	0.0287	0.254	2	CDKN1B,MDM2
GO: Biological Process	GO:0072422	signal transduction involved in DNA damage checkpoint	0.0146	1	0.0287	0.254	2	CDKN1B,MDM2
GO: Biological Process	GO:0060079	excitatory postsynaptic potential	0.0151	1	0.0294	0.26	2	MET,PTEN
GO: Biological Process	GO:1904063	negative regulation of cation transmembrane transport	0.0151	1	0.0294	0.26	2	TGFB1,MMP9
GO: Biological Process	GO:0072395	signal transduction involved in cell cycle checkpoint	0.0151	1	0.0294	0.26	2	CDKN1B,MDM2
GO: Biological Process	GO:0007632	visual behavior	0.0151	1	0.0294	0.26	2	KRAS,BRAF
GO: Biological Process	GO:0043525	positive regulation of neuron apoptotic process	0.0155	1	0.0301	0.266	2	TNF,CTNNB1
GO: Biological Process	GO:0045682	regulation of epidermis development	0.0155	1	0.0301	0.266	2	TNF,EZH2
GO: Biological Process	GO:0032890	regulation of organic acid transport	0.0155	1	0.0301	0.266	2	AKT1,TNF
GO: Biological Process	GO:0045669	positive regulation of osteoblast differentiation	0.0155	1	0.0301	0.266	2	CYR61,CTNNB1
GO: Biological Process	GO:0032204	regulation of telomere maintenance	0.0155	1	0.0301	0.266	2	MYC,CTNNB1
GO: Biological Process	GO:0022029	telencephalon cell migration	0.0155	1	0.0301	0.266	2	EGFR,CTNNB1
GO: Biological Process	GO:1901983	regulation of protein acetylation	0.0155	1	0.0301	0.266	2	TGFB1,BRCA1
GO: Biological Process	GO:0003151	outflow tract morphogenesis	0.0159	1	0.0309	0.273	2	FGFR2,CTNNB1
GO: Biological Process	GO:0002200	somatic diversification of immune receptors	0.0159	1	0.0309	0.273	2	TGFB1,MSH2
GO: Biological Process	GO:0033692	cellular polysaccharide biosynthetic process	0.0159	1	0.0309	0.273	2	IGF2,AKT1
GO: Biological Process	GO:0043242	negative regulation of protein complex disassembly	0.0164	1	0.0312	0.276	2	APC,TNF
GO: Biological Process	GO:1903076	regulation of protein localization to plasma membrane	0.0168	1	0.0314	0.278	2	TGFB1,AKT1
GO: Biological Process	GO:1904375	regulation of protein localization to cell periphery	0.0168	1	0.0314	0.278	2	TGFB1,AKT1
GO: Biological Process	GO:0021885	forebrain cell migration	0.0168	1	0.0314	0.278	2	EGFR,CTNNB1
GO: Biological Process	GO:0010657	muscle cell apoptotic process	0.0168	1	0.0314	0.278	2	CDKN2A,IGFBP3
GO: Biological Process	GO:0051304	chromosome separation	0.0168	1	0.0314	0.278	2	PTTG1,APC
GO: Biological Process	GO:0050771	negative regulation of axonogenesis	0.0173	1	0.0321	0.284	2	SPP1,PTEN
GO: Biological Process	GO:0003208	cardiac ventricle morphogenesis	0.0173	1	0.0321	0.284	2	FGFR2,CTNNB1
GO: Biological Process	GO:0030317	flagellated sperm motility	0.0173	1	0.0321	0.284	2	MET,WT1
GO: Biological Process	GO:0060415	muscle tissue morphogenesis	0.0177	1	0.0329	0.291	2	FGFR2,CTNNB1
GO: Biological Process	GO:0044819	mitotic G1/S transition checkpoint	0.0177	1	0.0329	0.291	2	CDKN1B,MDM2
GO: Biological Process	GO:0031571	mitotic G1 DNA damage checkpoint	0.0177	1	0.0329	0.291	2	CDKN1B,MDM2
GO: Biological Process	GO:0009127	purine nucleoside monophosphate biosynthetic process	0.0182	1	0.0337	0.298	2	TGFB1,MYC
GO: Biological Process	GO:0044783	G1 DNA damage checkpoint	0.0182	1	0.0337	0.298	2	CDKN1B,MDM2
GO: Biological Process	GO:0009168	purine ribonucleoside monophosphate biosynthetic process	0.0182	1	0.0337	0.298	2	TGFB1,MYC
GO: Biological Process	GO:0009142	nucleoside triphosphate biosynthetic process	0.0196	1	0.0355	0.313	2	TGFB1,MYC
GO: Biological Process	GO:0031145	anaphase-promoting complex-dependent catabolic process	0.0196	1	0.0355	0.313	2	PTTG1,SKP2
GO: Biological Process	GO:1903051	negative regulation of proteolysis involved in cellular protein catabolic process	0.0201	1	0.0363	0.321	2	CDKN2A,APC
[truncated: 654 more rows]
