# Supplementary material for: Integrative analysis of common genes and driver mutations implicated in hormone stimulation for four cancers in women
Source: PeerJ. 2019 Jun 6;7:e6872. doi: 10.7717/peerj.6872 (PMC6556371; doi:10.7717/peerj.6872)
Supplement: Supplemental Information 9 — The results of network analysis presented the pathways for each gene. [file peerj-07-6872-s009.xlsx]

## Sheet: Sheet1
Symbol	Description	Score	Functions	Links
KIAA1324		0.910981	extrinsic apoptotic signaling pathway, extrinsic apoptotic signaling pathway in absence of ligand, negative regulation of apoptotic signaling pathway, negative regulation of extrinsic apoptotic signaling pathway, negative regulation of extrinsic apoptotic signaling pathway in absence of ligand, negative regulation of signal transduction in absence of ligand, positive regulation of organelle organ…	http://www.ncbi.nlm.nih.gov/sites/entrez?db=gene&cmd=search&term=57535
RASSF1		0.815264	cell cycle arrest, negative regulation of cell cycle, negative regulation of cell cycle arrest, negative regulation of cell cycle process, posttranscriptional regulation of gene expression, protein stabilization, Ras protein signal transduction, regulation of cell cycle arrest, regulation of protein stability, regulation of protein ubiquitination, small GTPase mediated signal transduction	http://www.ncbi.nlm.nih.gov/sites/entrez?db=gene&cmd=search&term=11186
SKP2		0.783926	aggresome, G1/S transition of mitotic cell cycle, proteasomal protein catabolic process, proteasome-mediated ubiquitin-dependent protein catabolic process	http://www.ncbi.nlm.nih.gov/sites/entrez?db=gene&cmd=search&term=6502
SERPINB5		0.769748	endopeptidase inhibitor activity, endopeptidase regulator activity, enzyme inhibitor activity, negative regulation of endopeptidase activity, negative regulation of hydrolase activity, negative regulation of peptidase activity, peptidase inhibitor activity, peptidase regulator activity, regulation of endopeptidase activity, regulation of peptidase activity, regulation of protein processing, regul…	http://www.ncbi.nlm.nih.gov/sites/entrez?db=gene&cmd=search&term=5268
PGR		0.763468		http://www.ncbi.nlm.nih.gov/sites/entrez?db=gene&cmd=search&term=5241
ESR2		0.760742	cell growth, intracellular receptor signaling pathway, intracellular steroid hormone receptor signaling pathway, negative regulation of cell growth, negative regulation of growth, positive regulation of sequence-specific DNA binding transcription factor activity, regulation of cell growth, regulation of growth, regulatory region DNA binding, regulatory region nucleic acid binding, sequence-specif…	http://www.ncbi.nlm.nih.gov/sites/entrez?db=gene&cmd=search&term=2100
IGF2		0.748027	cellular response to insulin stimulus, cellular response to peptide, cellular response to peptide hormone stimulus, cytoplasmic membrane-bounded vesicle lumen, insulin receptor signaling pathway, kinase regulator activity, leukocyte proliferation, lymphocyte proliferation, mononuclear cell proliferation, nuclear division, peptidyl-tyrosine modification, peptidyl-tyrosine phosphorylation, platelet…	http://www.ncbi.nlm.nih.gov/sites/entrez?db=gene&cmd=search&term=3481
GDF15		0.74602	cellular response to transforming growth factor beta stimulus, response to transforming growth factor beta, transforming growth factor beta receptor signaling pathway, transmembrane receptor protein serine/threonine kinase signaling pathway	http://www.ncbi.nlm.nih.gov/sites/entrez?db=gene&cmd=search&term=9518
NDRG1		0.740495	adherens junction, anchoring junction, cadherin binding, cell adhesion molecule binding, cell cycle checkpoint, cell-cell adherens junction, cell-cell junction, cellular response to decreased oxygen levels, cellular response to hypoxia, cellular response to oxygen levels, DNA damage response, signal transduction by p53 class mediator, positive regulation of cell cycle process, regulation of cell …	http://www.ncbi.nlm.nih.gov/sites/entrez?db=gene&cmd=search&term=10397
SPP1		0.731756	developmental process involved in reproduction, extracellular matrix disassembly, extracellular matrix organization, extracellular structure organization, response to alcohol, response to lipid, response to organic cyclic compound	http://www.ncbi.nlm.nih.gov/sites/entrez?db=gene&cmd=search&term=6696
EZH2		0.719155	epithelial to mesenchymal transition, intracellular receptor signaling pathway, positive regulation of cell morphogenesis involved in differentiation, positive regulation of epithelial to mesenchymal transition, positive regulation of MAP kinase activity, positive regulation of MAPK cascade, positive regulation of protein serine/threonine kinase activity, regulation of cell morphogenesis involved…	http://www.ncbi.nlm.nih.gov/sites/entrez?db=gene&cmd=search&term=2146
MMP14		0.699776	cell growth, collagen catabolic process, collagen metabolic process, extracellular matrix disassembly, extracellular matrix organization, extracellular structure organization, Golgi lumen, multicellular organismal catabolic process, multicellular organismal macromolecule metabolic process, multicellular organismal metabolic process, positive regulation of cell growth, positive regulation of cell …	http://www.ncbi.nlm.nih.gov/sites/entrez?db=gene&cmd=search&term=4323
IGFBP3		0.699185	growth factor binding, muscle cell development, muscle cell differentiation, muscle cell proliferation, muscle structure development, muscle tissue development, myoblast differentiation, negative regulation of cell migration, negative regulation of cell motility, negative regulation of cellular component movement, negative regulation of locomotion, negative regulation of phosphate metabolic proce…	http://www.ncbi.nlm.nih.gov/sites/entrez?db=gene&cmd=search&term=3486
TERT		0.696248	aging, cell aging, extrinsic apoptotic signaling pathway, extrinsic apoptotic signaling pathway in absence of ligand, negative regulation of apoptotic signaling pathway, negative regulation of extrinsic apoptotic signaling pathway, negative regulation of extrinsic apoptotic signaling pathway in absence of ligand, negative regulation of signal transduction in absence of ligand, nuclear body, regul…	http://www.ncbi.nlm.nih.gov/sites/entrez?db=gene&cmd=search&term=7015
BRAF		0.694219	activation of protein kinase activity, cellular response to fibroblast growth factor stimulus, cellular response to inorganic substance, cellular response to metal ion, ERK1 and ERK2 cascade, fibroblast growth factor receptor signaling pathway, neurotrophin signaling pathway, neurotrophin TRK receptor signaling pathway, peptidyl-serine modification, peptidyl-serine phosphorylation, positive regul…	http://www.ncbi.nlm.nih.gov/sites/entrez?db=gene&cmd=search&term=673
WT1		0.693901	apoptotic DNA fragmentation, branching involved in ureteric bud morphogenesis, branching morphogenesis of an epithelial tube, cell growth, cell proliferation involved in kidney development, cellular component disassembly involved in execution phase of apoptosis, cellular process involved in reproduction, cellular response to organic cyclic compound, development of primary male sexual characterist…	http://www.ncbi.nlm.nih.gov/sites/entrez?db=gene&cmd=search&term=7490
CCNE1		0.687507	androgen receptor binding, androgen receptor signaling pathway, G1/S transition of mitotic cell cycle, hormone receptor binding, intracellular receptor signaling pathway, intracellular steroid hormone receptor signaling pathway, nuclear hormone receptor binding, steroid hormone receptor binding	http://www.ncbi.nlm.nih.gov/sites/entrez?db=gene&cmd=search&term=898
RUNX3		0.686673	adenyl nucleotide binding, adenyl ribonucleotide binding, ATP binding, epithelial cell proliferation, negative regulation of cell cycle, negative regulation of epithelial cell proliferation, regulation of epithelial cell proliferation, regulatory region DNA binding, regulatory region nucleic acid binding, sequence-specific DNA binding, transcription regulatory region DNA binding	http://www.ncbi.nlm.nih.gov/sites/entrez?db=gene&cmd=search&term=864
CYR61		0.68535	epiboly, ERK1 and ERK2 cascade, morphogenesis of an epithelial sheet, morphogenesis of an epithelium, ossification, osteoblast differentiation, osteoblast proliferation, positive regulation of cell migration, positive regulation of cell motility, positive regulation of cellular component movement, positive regulation of locomotion, positive regulation of transmembrane receptor protein serine/thre…	http://www.ncbi.nlm.nih.gov/sites/entrez?db=gene&cmd=search&term=3491
SDC1		0.673809	adherens junction, aminoglycan biosynthetic process, aminoglycan catabolic process, aminoglycan metabolic process, anchoring junction, cell-substrate adherens junction, cell-substrate junction, extracellular matrix organization, extracellular structure organization, focal adhesion, glycosaminoglycan biosynthetic process, glycosaminoglycan catabolic process, glycosaminoglycan metabolic process, Go…	http://www.ncbi.nlm.nih.gov/sites/entrez?db=gene&cmd=search&term=6382
MMP1		0.670595	collagen catabolic process, collagen metabolic process, endopeptidase activity, extracellular matrix disassembly, extracellular matrix organization, extracellular structure organization, leukocyte migration, metalloendopeptidase activity, metallopeptidase activity, multicellular organismal catabolic process, multicellular organismal macromolecule metabolic process, multicellular organismal metabo…	http://www.ncbi.nlm.nih.gov/sites/entrez?db=gene&cmd=search&term=4312
FGFR2		0.670041	angiogenesis, branching morphogenesis of an epithelial tube, canonical Wnt signaling pathway, cellular process involved in reproduction, cellular response to fibroblast growth factor stimulus, cellular response to insulin stimulus, cellular response to peptide, cellular response to peptide hormone stimulus, central nervous system neuron development, developmental process involved in reproduction,…	http://www.ncbi.nlm.nih.gov/sites/entrez?db=gene&cmd=search&term=2263
BCL2		0.670013	B cell activation, cell growth, cell-type specific apoptotic process, extrinsic apoptotic signaling pathway, extrinsic apoptotic signaling pathway in absence of ligand, extrinsic apoptotic signaling pathway via death domain receptors, immune response-regulating cell surface receptor signaling pathway, intracellular receptor signaling pathway, intrinsic apoptotic signaling pathway, intrinsic apopt…	http://www.ncbi.nlm.nih.gov/sites/entrez?db=gene&cmd=search&term=596
MET		0.662372	ameboidal cell migration, basolateral plasma membrane, behavior, branching morphogenesis of an epithelial tube, endothelial cell migration, epithelial cell migration, epithelial tube morphogenesis, morphogenesis of a branching epithelium, morphogenesis of a branching structure, morphogenesis of an epithelium, negative regulation of cellular response to oxidative stress, peptidyl-tyrosine modifica…	http://www.ncbi.nlm.nih.gov/sites/entrez?db=gene&cmd=search&term=4233
PTTG1		0.659324	endopeptidase inhibitor activity, endopeptidase regulator activity, enzyme inhibitor activity, negative regulation of endopeptidase activity, negative regulation of hydrolase activity, negative regulation of peptidase activity, peptidase inhibitor activity, peptidase regulator activity, proteasomal protein catabolic process, proteasome-mediated ubiquitin-dependent protein catabolic process, regul…	http://www.ncbi.nlm.nih.gov/sites/entrez?db=gene&cmd=search&term=9232
CDK6		0.658241	adenyl nucleotide binding, adenyl ribonucleotide binding, aging, ATP binding, cell aging, cell cycle arrest, cell leading edge, cell-matrix adhesion, cell-substrate adhesion, cellular senescence, cyclin-dependent protein kinase holoenzyme complex, endocrine system development, epithelial cell development, epithelial cell differentiation, epithelial cell proliferation, fibroblast proliferation, G1…	http://www.ncbi.nlm.nih.gov/sites/entrez?db=gene&cmd=search&term=1021
TIMP1		0.654632	ameboidal cell migration, cellular process involved in reproduction, cytoplasmic membrane-bounded vesicle lumen, endopeptidase inhibitor activity, endopeptidase regulator activity, enzyme inhibitor activity, extracellular matrix disassembly, extracellular matrix organization, extracellular structure organization, membrane protein ectodomain proteolysis, membrane protein proteolysis, negative regu…	http://www.ncbi.nlm.nih.gov/sites/entrez?db=gene&cmd=search&term=7076
MMP12		0.653383	collagen catabolic process, collagen metabolic process, endopeptidase activity, epiboly, epithelial cell proliferation, extracellular matrix disassembly, extracellular matrix organization, extracellular structure organization, metalloendopeptidase activity, metallopeptidase activity, morphogenesis of an epithelial sheet, morphogenesis of an epithelium, multicellular organismal catabolic process, …	http://www.ncbi.nlm.nih.gov/sites/entrez?db=gene&cmd=search&term=4321
CD44		0.651083	aminoglycan catabolic process, aminoglycan metabolic process, cartilage development, cell-cell adhesion, cell-matrix adhesion, cell-substrate adhesion, cellular response to fibroblast growth factor stimulus, collagen binding, DNA damage response, signal transduction by p53 class mediator, ERK1 and ERK2 cascade, extracellular matrix disassembly, extracellular matrix organization, extracellular str…	http://www.ncbi.nlm.nih.gov/sites/entrez?db=gene&cmd=search&term=960
PTEN		0.648958	adherens junction organization, behavior, canonical Wnt signaling pathway, cell junction assembly, cell junction organization, cell-cell junction organization, cell-matrix adhesion, cell-substrate adhesion, cellular response to fibroblast growth factor stimulus, central nervous system neuron development, cytoplasmic side of membrane, cytoplasmic side of plasma membrane, epidermal growth factor re…	http://www.ncbi.nlm.nih.gov/sites/entrez?db=gene&cmd=search&term=5728
CDKN1B		0.647793	activation of cysteine-type endopeptidase activity involved in apoptotic process, cell cycle arrest, cell cycle checkpoint, cell growth, cellular response to fibroblast growth factor stimulus, cellular response to inorganic substance, cellular response to metal ion, DNA damage checkpoint, DNA damage response, signal transduction by p53 class mediator, DNA damage response, signal transduction by p…	http://www.ncbi.nlm.nih.gov/sites/entrez?db=gene&cmd=search&term=1027
TIMP3		0.644725	endopeptidase inhibitor activity, endopeptidase regulator activity, enzyme inhibitor activity, extracellular matrix, membrane protein ectodomain proteolysis, membrane protein proteolysis, negative regulation of catabolic process, negative regulation of cellular catabolic process, negative regulation of endopeptidase activity, negative regulation of hydrolase activity, negative regulation of pepti…	http://www.ncbi.nlm.nih.gov/sites/entrez?db=gene&cmd=search&term=7078
PTGS2		0.644346	acute-phase response, ameboidal cell migration, angiogenesis, blood vessel endothelial cell migration, cellular response to decreased oxygen levels, cellular response to hypoxia, cellular response to oxygen levels, endothelial cell migration, epithelial cell migration, fat cell differentiation, nitric oxide biosynthetic process, nitric oxide metabolic process, positive regulation of acute inflamm…	http://www.ncbi.nlm.nih.gov/sites/entrez?db=gene&cmd=search&term=5743
CDKN2A		0.643874	activation of cysteine-type endopeptidase activity involved in apoptotic process, aging, apoptotic DNA fragmentation, B cell activation, cell aging, cell cycle arrest, cell cycle checkpoint, cell growth, cell-matrix adhesion, cell-substrate adhesion, cell-type specific apoptotic process, cellular senescence, cyclin-dependent protein serine/threonine kinase regulator activity, DNA damage response,…	http://www.ncbi.nlm.nih.gov/sites/entrez?db=gene&cmd=search&term=1029
APC		0.643343	adherens junction, anchoring junction, apical junction complex, beta-catenin binding, beta-catenin destruction complex, canonical Wnt signaling pathway, cell cycle arrest, cell cycle checkpoint, cell junction assembly, cell junction organization, cell leading edge, cell-cell adherens junction, cell-cell junction, cell-cell junction organization, cellular component disassembly involved in executio…	http://www.ncbi.nlm.nih.gov/sites/entrez?db=gene&cmd=search&term=324
ESR1		0.640464	beta-catenin binding, cellular response to alcohol, cellular response to estrogen stimulus, cellular response to lipid, cellular response to organic cyclic compound, intracellular receptor signaling pathway, intracellular steroid hormone receptor signaling pathway, negative regulation of intracellular signal transduction, nitric oxide biosynthetic process, nitric oxide metabolic process, positive…	http://www.ncbi.nlm.nih.gov/sites/entrez?db=gene&cmd=search&term=2099
TNF		0.639555	activation of cysteine-type endopeptidase activity involved in apoptotic process, activation of protein kinase activity, acute-phase response, branching morphogenesis of an epithelial tube, cell-cell adhesion, cell-type specific apoptotic process, cellular response to lipid, cellular response to organic cyclic compound, digestive system development, digestive tract development, embryonic digestiv…	http://www.ncbi.nlm.nih.gov/sites/entrez?db=gene&cmd=search&term=7124
MDM2		0.639202	cell cycle arrest, cell cycle checkpoint, cellular response to decreased oxygen levels, cellular response to fibroblast growth factor stimulus, cellular response to hypoxia, cellular response to oxygen levels, DNA damage checkpoint, DNA damage response, signal transduction by p53 class mediator, DNA damage response, signal transduction by p53 class mediator resulting in cell cycle arrest, DNA int…	http://www.ncbi.nlm.nih.gov/sites/entrez?db=gene&cmd=search&term=4193
TGFB1		0.637163	adaptive immune response, adaptive immune response based on somatic recombination of immune receptors built from immunoglobulin superfamily domains, ameboidal cell migration, aminoglycan biosynthetic process, aminoglycan catabolic process, aminoglycan metabolic process, B cell activation, B cell activation involved in immune response, B cell mediated immunity, behavior, blood vessel endothelial c…	http://www.ncbi.nlm.nih.gov/sites/entrez?db=gene&cmd=search&term=7040
KRAS		0.633044	activation of protein kinase activity, cellular response to fibroblast growth factor stimulus, cellular response to insulin stimulus, cellular response to peptide, cellular response to peptide hormone stimulus, epidermal growth factor receptor signaling pathway, ERBB signaling pathway, Fc receptor signaling pathway, Fc-epsilon receptor signaling pathway, fibroblast growth factor receptor signalin…	http://www.ncbi.nlm.nih.gov/sites/entrez?db=gene&cmd=search&term=3845
MMP2		0.631232	collagen catabolic process, collagen metabolic process, endopeptidase activity, extracellular matrix disassembly, extracellular matrix organization, extracellular structure organization, multicellular organismal catabolic process, multicellular organismal macromolecule metabolic process, multicellular organismal metabolic process	http://www.ncbi.nlm.nih.gov/sites/entrez?db=gene&cmd=search&term=4313
ERBB2		0.630385	angiogenesis, basolateral plasma membrane, cell growth, cellular response to fibroblast growth factor stimulus, epidermal growth factor receptor signaling pathway, epithelial cell proliferation, ERBB signaling pathway, ERK1 and ERK2 cascade, Fc receptor signaling pathway, Fc-epsilon receptor signaling pathway, fibroblast growth factor receptor signaling pathway, gland development, growth factor b…	http://www.ncbi.nlm.nih.gov/sites/entrez?db=gene&cmd=search&term=2064
MMP9		0.628298	ameboidal cell migration, collagen binding, collagen catabolic process, collagen metabolic process, endopeptidase activity, epithelial cell migration, extracellular matrix disassembly, extracellular matrix organization, extracellular structure organization, hematopoietic or lymphoid organ development, hemopoiesis, immune system development, leukocyte differentiation, metalloendopeptidase activity…	http://www.ncbi.nlm.nih.gov/sites/entrez?db=gene&cmd=search&term=4318
BRCA1		0.619831	adherens junction, anchoring junction, androgen receptor binding, androgen receptor signaling pathway, cell cycle arrest, cell cycle checkpoint, cell leading edge, cell-substrate adherens junction, cell-substrate adhesion, cell-substrate junction, cellular response to alcohol, cellular response to organic cyclic compound, DNA damage checkpoint, DNA damage response, signal transduction by p53 clas…	http://www.ncbi.nlm.nih.gov/sites/entrez?db=gene&cmd=search&term=672
DNMT1		0.605464	negative regulation of histone modification, negative regulation of organelle organization, positive regulation of histone methylation, positive regulation of organelle organization, regulation of chromosome organization, regulation of histone H3-K4 methylation, regulation of histone methylation	http://www.ncbi.nlm.nih.gov/sites/entrez?db=gene&cmd=search&term=1786
CDH1		0.594134	adherens junction, adherens junction organization, aggresome, anchoring junction, apical junction complex, beta-catenin binding, cell adhesion molecule binding, cell junction assembly, cell junction organization, cell-cell adherens junction, cell-cell adhesion, cell-cell junction, cell-cell junction organization, cell-substrate adherens junction, cell-substrate junction, cellular component disass…	http://www.ncbi.nlm.nih.gov/sites/entrez?db=gene&cmd=search&term=999
SPARC		0.593199	collagen binding, cytoplasmic membrane-bounded vesicle lumen, extracellular matrix, extracellular matrix organization, extracellular structure organization, platelet activation, platelet alpha granule, platelet alpha granule lumen, platelet degranulation, secretory granule, secretory granule lumen, vesicle lumen	http://www.ncbi.nlm.nih.gov/sites/entrez?db=gene&cmd=search&term=6678
MSH2		0.578092	adaptive immune response, adaptive immune response based on somatic recombination of immune receptors built from immunoglobulin superfamily domains, adenyl nucleotide binding, adenyl ribonucleotide binding, ADP binding, ATP binding, B cell activation, B cell activation involved in immune response, B cell mediated immunity, cell cycle checkpoint, cell-type specific apoptotic process, cellular proc…	http://www.ncbi.nlm.nih.gov/sites/entrez?db=gene&cmd=search&term=4436
MYC		0.575424	branching involved in ureteric bud morphogenesis, branching morphogenesis of an epithelial tube, canonical Wnt signaling pathway, cell cycle arrest, cell proliferation involved in kidney development, cell-type specific apoptotic process, cellular response to transforming growth factor beta stimulus, epithelial cell proliferation, epithelial tube morphogenesis, fibroblast proliferation, kidney dev…	http://www.ncbi.nlm.nih.gov/sites/entrez?db=gene&cmd=search&term=4609
AKT1		0.554948	adenyl nucleotide binding, adenyl ribonucleotide binding, ameboidal cell migration, ATP binding, blood vessel endothelial cell migration, cell cycle checkpoint, cell growth, cell-type specific apoptotic process, cellular response to fibroblast growth factor stimulus, cellular response to insulin stimulus, cellular response to peptide, cellular response to peptide hormone stimulus, endocrine syste…	http://www.ncbi.nlm.nih.gov/sites/entrez?db=gene&cmd=search&term=207
CTNNB1		0.544512	adherens junction, adherens junction organization, anchoring junction, androgen receptor binding, androgen receptor signaling pathway, angiogenesis, apical junction complex, beta-catenin destruction complex, branching involved in ureteric bud morphogenesis, branching morphogenesis of an epithelial tube, cadherin binding, canonical Wnt signaling pathway, cartilage development, cell adhesion molecu…	http://www.ncbi.nlm.nih.gov/sites/entrez?db=gene&cmd=search&term=1499
EGFR		0.477179	basolateral plasma membrane, behavior, cell-cell adhesion, cellular response to alcohol, cellular response to estrogen stimulus, cellular response to fibroblast growth factor stimulus, cellular response to lipid, cellular response to organic cyclic compound, epidermal growth factor receptor signaling pathway, epithelial cell proliferation, ERBB signaling pathway, ERK1 and ERK2 cascade, Fc recepto…	http://www.ncbi.nlm.nih.gov/sites/entrez?db=gene&cmd=search&term=1956
TIMP4		0.0321082	endopeptidase inhibitor activity, endopeptidase regulator activity, enzyme inhibitor activity, negative regulation of endopeptidase activity, negative regulation of hydrolase activity, negative regulation of peptidase activity, peptidase inhibitor activity, peptidase regulator activity, regulation of endopeptidase activity, regulation of peptidase activity	http://www.ncbi.nlm.nih.gov/sites/entrez?db=gene&cmd=search&term=7079
TIMP2		0.0297968	extracellular matrix disassembly, extracellular matrix organization, extracellular structure organization, negative regulation of endopeptidase activity, negative regulation of hydrolase activity, negative regulation of peptidase activity, regulation of endopeptidase activity, regulation of peptidase activity	http://www.ncbi.nlm.nih.gov/sites/entrez?db=gene&cmd=search&term=7077
MMP3		0.0223751	collagen catabolic process, collagen metabolic process, extracellular matrix disassembly, extracellular matrix organization, extracellular structure organization, multicellular organismal catabolic process, multicellular organismal macromolecule metabolic process, multicellular organismal metabolic process	http://www.ncbi.nlm.nih.gov/sites/entrez?db=gene&cmd=search&term=4314
MSANTD3-TMEFF1		0.0213719		http://www.ensembl.org/Homo_sapiens/geneview?gene=ENSG00000251349
CDKN1A		0.0213265	aging, cell aging, cell cycle arrest, cell cycle checkpoint, cell growth, cellular response to fibroblast growth factor stimulus, cellular senescence, cyclin-dependent protein kinase holoenzyme complex, cyclin-dependent protein serine/threonine kinase regulator activity, DNA damage checkpoint, DNA damage response, signal transduction by p53 class mediator, DNA damage response, signal transduction…	http://www.ncbi.nlm.nih.gov/sites/entrez?db=gene&cmd=search&term=1026
MSH6		0.0191114	adaptive immune response, adaptive immune response based on somatic recombination of immune receptors built from immunoglobulin superfamily domains, adenyl nucleotide binding, adenyl ribonucleotide binding, ADP binding, aging, ATP binding, B cell activation, B cell activation involved in immune response, B cell mediated immunity, cellular process involved in reproduction, DNA recombination, DNA s…	http://www.ncbi.nlm.nih.gov/sites/entrez?db=gene&cmd=search&term=2956
RUNX1		0.018818	angiogenesis, hematopoietic or lymphoid organ development, hemopoiesis, immune system development, leukocyte differentiation, myeloid cell differentiation, myeloid leukocyte differentiation, negative regulation of cell differentiation, negative regulation of leukocyte differentiation, negative regulation of myeloid cell differentiation, negative regulation of myeloid leukocyte differentiation, re…	http://www.ncbi.nlm.nih.gov/sites/entrez?db=gene&cmd=search&term=100506403
CTNNA1		0.0181457	adherens junction organization, beta-catenin binding, cadherin binding, cell adhesion molecule binding, cell junction assembly, cell junction organization, cell-cell junction, cell-cell junction organization, cellular response to alcohol, cellular response to organic cyclic compound, extrinsic component of plasma membrane, gamma-catenin binding, muscle cell differentiation, muscle structure devel…	http://www.ncbi.nlm.nih.gov/sites/entrez?db=gene&cmd=search&term=1495
CCND1		0.0170724	cell cycle arrest, cell cycle checkpoint, cyclin-dependent protein kinase holoenzyme complex, DNA damage checkpoint, DNA integrity checkpoint, G1 DNA damage checkpoint, G1/S transition of mitotic cell cycle, mitotic cell cycle checkpoint, mitotic DNA damage checkpoint, mitotic DNA integrity checkpoint, mitotic G1 DNA damage checkpoint, mitotic G1/S transition checkpoint, negative regulation of ce…	http://www.ncbi.nlm.nih.gov/sites/entrez?db=gene&cmd=search&term=595
ACAN		0.0167768	aminoglycan biosynthetic process, aminoglycan catabolic process, aminoglycan metabolic process, extracellular matrix, extracellular matrix disassembly, extracellular matrix organization, extracellular structure organization, glycosaminoglycan biosynthetic process, glycosaminoglycan catabolic process, glycosaminoglycan metabolic process, Golgi lumen, lysosomal lumen, skeletal system development, v…	http://www.ncbi.nlm.nih.gov/sites/entrez?db=gene&cmd=search&term=176
TNFRSF1A		0.0164629	extrinsic apoptotic signaling pathway, extrinsic apoptotic signaling pathway via death domain receptors, membrane raft, peptidyl-tyrosine modification, peptidyl-tyrosine phosphorylation, positive regulation of inflammatory response, positive regulation of peptidyl-tyrosine phosphorylation, positive regulation of response to external stimulus, regulation of peptidyl-tyrosine phosphorylation	http://www.ncbi.nlm.nih.gov/sites/entrez?db=gene&cmd=search&term=7132
COL1A2		0.0163397	cellular response to transforming growth factor beta stimulus, collagen catabolic process, collagen metabolic process, extracellular matrix, extracellular matrix disassembly, extracellular matrix organization, extracellular structure organization, growth factor binding, leukocyte migration, multicellular organismal catabolic process, multicellular organismal macromolecule metabolic process, multi…	http://www.ncbi.nlm.nih.gov/sites/entrez?db=gene&cmd=search&term=1278
FGF10		0.0159876	activation of protein kinase activity, ameboidal cell migration, branching morphogenesis of an epithelial tube, cell cycle arrest, cellular response to fibroblast growth factor stimulus, cellular response to insulin stimulus, cellular response to peptide, cellular response to peptide hormone stimulus, epidermal growth factor receptor signaling pathway, epithelial cell migration, epithelial cell p…	http://www.ncbi.nlm.nih.gov/sites/entrez?db=gene&cmd=search&term=2255
PTTG2		0.0158118		http://www.ncbi.nlm.nih.gov/sites/entrez?db=gene&cmd=search&term=10744
CDKN1C		0.0153047	cellular response to transforming growth factor beta stimulus, epithelial cell proliferation, negative regulation of epithelial cell proliferation, negative regulation of kinase activity, negative regulation of phosphate metabolic process, negative regulation of phosphorus metabolic process, negative regulation of phosphorylation, negative regulation of protein kinase activity, negative regulatio…	http://www.ncbi.nlm.nih.gov/sites/entrez?db=gene&cmd=search&term=1028
DAXX		0.0149497	activation of protein kinase activity, androgen receptor binding, androgen receptor signaling pathway, extrinsic apoptotic signaling pathway, extrinsic apoptotic signaling pathway via death domain receptors, hormone receptor binding, intracellular receptor signaling pathway, intracellular steroid hormone receptor signaling pathway, nuclear body, nuclear hormone receptor binding, p53 binding, posi…	http://www.ncbi.nlm.nih.gov/sites/entrez?db=gene&cmd=search&term=1616
HSD17B3		0.0148215	development of primary male sexual characteristics, development of primary sexual characteristics, developmental process involved in reproduction, genitalia development, male sex differentiation, reproductive structure development, reproductive system development, sex differentiation	http://www.ncbi.nlm.nih.gov/sites/entrez?db=gene&cmd=search&term=3293
VCAN		0.0147442	aminoglycan biosynthetic process, aminoglycan catabolic process, aminoglycan metabolic process, extracellular matrix, extracellular matrix organization, extracellular structure organization, gliogenesis, glycosaminoglycan biosynthetic process, glycosaminoglycan catabolic process, glycosaminoglycan metabolic process, Golgi lumen, lysosomal lumen, proteoglycan metabolic process, vacuolar lumen	http://www.ncbi.nlm.nih.gov/sites/entrez?db=gene&cmd=search&term=1462
ARAF		0.0145242	peptidyl-serine modification, peptidyl-serine phosphorylation, positive regulation of peptidyl-serine phosphorylation, proteasomal protein catabolic process, proteasome-mediated ubiquitin-dependent protein catabolic process, regulation of peptidyl-serine phosphorylation, regulation of proteasomal protein catabolic process, regulation of proteasomal ubiquitin-dependent protein catabolic process, r…	http://www.ncbi.nlm.nih.gov/sites/entrez?db=gene&cmd=search&term=369
ADAM17		0.0143641	adaptive immune response, adaptive immune response based on somatic recombination of immune receptors built from immunoglobulin superfamily domains, adherens junction, anchoring junction, B cell activation, behavior, cell growth, cell leading edge, cell-cell junction, cell-substrate adherens junction, cell-substrate junction, cell-type specific apoptotic process, cellular response to peptide, cel…	http://www.ncbi.nlm.nih.gov/sites/entrez?db=gene&cmd=search&term=6868
