# Supplementary material for: Integrative analysis of common genes and driver mutations implicated in hormone stimulation for four cancers in women
Source: PeerJ. 2019 Jun 6;7:e6872. doi: 10.7717/peerj.6872 (PMC6556371; doi:10.7717/peerj.6872)
Supplement: Supplemental Information 11 — The result of enrichment analysis showing the role of the genes and the gene ontology terms. [file peerj-07-6872-s011.xlsx]

## Sheet: Sheet1
Category	ID	Name	Source	p-value	q-value Bonferroni	q-value FDR B&H	q-value FDR B&Y	Hit Count in Query List	Hit Count in Genome	Hit in Query List
GO: Biological Process	GO:0009719	response to endogenous stimulus		1.152e-08	1.638e-05	1.638e-05	0.0001284	12	1740	CDKN1A,CDKN1C,TIMP2,TIMP4,FGF10,DAXX,CCND1,ADAM17,CTNNA1,MMP3,RUNX1,COL1A2
GO: Biological Process	GO:1904031	positive regulation of cyclin-dependent protein kinase activity		5.587e-08	7.944e-05	3.972e-05	0.0003113	4	38	CDKN1A,FGF10,CCND1,ADAM17
GO: Biological Process	GO:0033993	response to lipid		2.464e-07	0.0003504	0.0001168	0.0009154	9	1023	CDKN1A,TIMP4,FGF10,DAXX,CCND1,ADAM17,CTNNA1,TNFRSF1A,RUNX1
GO: Biological Process	GO:0071900	regulation of protein serine/threonine kinase activity		4.367e-07	0.0006211	0.0001553	0.001217	7	513	CDKN1A,CDKN1C,FGF10,DAXX,ARAF,CCND1,ADAM17
GO: Biological Process	GO:1901700	response to oxygen-containing compound		1.035e-06	0.001472	0.0002944	0.002308	10	1614	CDKN1A,TIMP4,FGF10,CCND1,ADAM17,CTNNA1,MMP3,TNFRSF1A,RUNX1,COL1A2
GO: Biological Process	GO:0001934	positive regulation of protein phosphorylation		2.183e-06	0.003105	0.0003594	0.002817	8	959	CDKN1A,TIMP2,FGF10,DAXX,ARAF,CCND1,ADAM17,TNFRSF1A
GO: Biological Process	GO:0000079	regulation of cyclin-dependent protein serine/threonine kinase activity		2.226e-06	0.003166	0.0003594	0.002817	4	94	CDKN1A,FGF10,CCND1,ADAM17
GO: Biological Process	GO:0019220	regulation of phosphate metabolic process		2.254e-06	0.003205	0.0003594	0.002817	10	1756	CDKN1A,CDKN1C,TIMP2,FGF10,DAXX,ARAF,CCND1,ADAM17,VCAN,TNFRSF1A
GO: Biological Process	GO:0051174	regulation of phosphorus metabolic process		2.412e-06	0.00343	0.0003594	0.002817	10	1769	CDKN1A,CDKN1C,TIMP2,FGF10,DAXX,ARAF,CCND1,ADAM17,VCAN,TNFRSF1A
GO: Biological Process	GO:1904029	regulation of cyclin-dependent protein kinase activity		2.739e-06	0.003895	0.0003594	0.002817	4	99	CDKN1A,FGF10,CCND1,ADAM17
GO: Biological Process	GO:0071336	regulation of hair follicle cell proliferation		2.957e-06	0.004204	0.0003594	0.002817	2	3	FGF10,RUNX1
GO: Biological Process	GO:0042327	positive regulation of phosphorylation		3.056e-06	0.004345	0.0003594	0.002817	8	1003	CDKN1A,TIMP2,FGF10,DAXX,ARAF,CCND1,ADAM17,TNFRSF1A
GO: Biological Process	GO:0031399	regulation of protein modification process		3.476e-06	0.004943	0.0003594	0.002817	10	1841	CDKN1A,CDKN1C,TIMP2,FGF10,DAXX,ARAF,CCND1,ADAM17,VCAN,TNFRSF1A
GO: Biological Process	GO:0001932	regulation of protein phosphorylation		3.539e-06	0.005032	0.0003594	0.002817	9	1404	CDKN1A,CDKN1C,TIMP2,FGF10,DAXX,ARAF,CCND1,ADAM17,TNFRSF1A
GO: Biological Process	GO:0071335	hair follicle cell proliferation		5.91e-06	0.008404	0.0004111	0.003222	2	4	FGF10,RUNX1
GO: Biological Process	GO:0048608	reproductive structure development		6.007e-06	0.008541	0.0004111	0.003222	6	483	CDKN1C,FGF10,CCND1,CTNNA1,RUNX1,HSD17B3
GO: Biological Process	GO:0022414	reproductive process		6.219e-06	0.008843	0.0004111	0.003222	9	1503	CDKN1C,TIMP4,MSH6,FGF10,CCND1,CTNNA1,PTTG2,RUNX1,HSD17B3
GO: Biological Process	GO:0000003	reproduction		6.287e-06	0.008941	0.0004111	0.003222	9	1505	CDKN1C,TIMP4,MSH6,FGF10,CCND1,CTNNA1,PTTG2,RUNX1,HSD17B3
GO: Biological Process	GO:0045737	positive regulation of cyclin-dependent protein serine/threonine kinase activity		6.293e-06	0.008949	0.0004111	0.003222	3	36	FGF10,CCND1,ADAM17
GO: Biological Process	GO:0061458	reproductive system development		6.298e-06	0.008955	0.0004111	0.003222	6	487	CDKN1C,FGF10,CCND1,CTNNA1,RUNX1,HSD17B3
GO: Biological Process	GO:0042325	regulation of phosphorylation		6.462e-06	0.009188	0.0004111	0.003222	9	1510	CDKN1A,CDKN1C,TIMP2,FGF10,DAXX,ARAF,CCND1,ADAM17,TNFRSF1A
GO: Biological Process	GO:0045859	regulation of protein kinase activity		6.836e-06	0.00972	0.0004111	0.003222	7	775	CDKN1A,CDKN1C,FGF10,DAXX,ARAF,CCND1,ADAM17
GO: Biological Process	GO:0045860	positive regulation of protein kinase activity		6.995e-06	0.009946	0.0004111	0.003222	6	496	CDKN1A,FGF10,DAXX,ARAF,CCND1,ADAM17
GO: Biological Process	GO:0045937	positive regulation of phosphate metabolic process		7.227e-06	0.01028	0.0004111	0.003222	8	1126	CDKN1A,TIMP2,FGF10,DAXX,ARAF,CCND1,ADAM17,TNFRSF1A
GO: Biological Process	GO:0010562	positive regulation of phosphorus metabolic process		7.227e-06	0.01028	0.0004111	0.003222	8	1126	CDKN1A,TIMP2,FGF10,DAXX,ARAF,CCND1,ADAM17,TNFRSF1A
GO: Biological Process	GO:0007346	regulation of mitotic cell cycle		8.02e-06	0.0114	0.0004386	0.003438	6	508	CDKN1A,CDKN1C,TIMP2,FGF10,CCND1,ADAM17
GO: Biological Process	GO:0006509	membrane protein ectodomain proteolysis		1.008e-05	0.01433	0.0005189	0.004067	3	42	TIMP2,TIMP4,ADAM17
GO: Biological Process	GO:0033674	positive regulation of kinase activity		1.022e-05	0.01453	0.0005189	0.004067	6	530	CDKN1A,FGF10,DAXX,ARAF,CCND1,ADAM17
GO: Biological Process	GO:0007568	aging		1.151e-05	0.01637	0.00054	0.004232	5	308	CDKN1A,CDKN1C,TIMP2,MSH6,CTNNA1
GO: Biological Process	GO:0007548	sex differentiation		1.17e-05	0.01663	0.00054	0.004232	5	309	FGF10,CCND1,CTNNA1,RUNX1,HSD17B3
GO: Biological Process	GO:0043549	regulation of kinase activity		1.177e-05	0.01674	0.00054	0.004232	7	842	CDKN1A,CDKN1C,FGF10,DAXX,ARAF,CCND1,ADAM17
GO: Biological Process	GO:2000045	regulation of G1/S transition of mitotic cell cycle		1.282e-05	0.01823	0.0005698	0.004465	4	146	CDKN1A,FGF10,CCND1,ADAM17
GO: Biological Process	GO:0031401	positive regulation of protein modification process		1.386e-05	0.01971	0.0005829	0.004568	8	1230	CDKN1A,TIMP2,FGF10,DAXX,ARAF,CCND1,ADAM17,TNFRSF1A
GO: Biological Process	GO:0023056	positive regulation of signaling		1.419e-05	0.02018	0.0005829	0.004568	9	1662	CDKN1C,TIMP2,FGF10,DAXX,ARAF,ADAM17,CTNNA1,TNFRSF1A,RUNX1
GO: Biological Process	GO:0042127	regulation of cell proliferation		1.447e-05	0.02057	0.0005829	0.004568	9	1666	CDKN1A,CDKN1C,TIMP2,FGF10,CCND1,ADAM17,CTNNA1,TNFRSF1A,RUNX1
GO: Biological Process	GO:0051045	negative regulation of membrane protein ectodomain proteolysis		1.476e-05	0.02098	0.0005829	0.004568	2	6	TIMP2,TIMP4
GO: Biological Process	GO:0010647	positive regulation of cell communication		1.579e-05	0.02246	0.000607	0.004757	9	1684	CDKN1C,TIMP2,FGF10,DAXX,ARAF,ADAM17,CTNNA1,TNFRSF1A,RUNX1
GO: Biological Process	GO:1902806	regulation of cell cycle G1/S phase transition		1.665e-05	0.02367	0.000623	0.004883	4	156	CDKN1A,FGF10,CCND1,ADAM17
GO: Biological Process	GO:0071495	cellular response to endogenous stimulus		1.835e-05	0.0261	0.0006692	0.005245	8	1278	CDKN1C,FGF10,DAXX,ADAM17,CTNNA1,MMP3,RUNX1,COL1A2
GO: Biological Process	GO:0043066	negative regulation of apoptotic process		1.884e-05	0.02679	0.0006696	0.005248	7	905	CDKN1A,FGF10,DAXX,ARAF,ADAM17,CTNNA1,TNFRSF1A
GO: Biological Process	GO:0043069	negative regulation of programmed cell death		2.081e-05	0.02959	0.0007182	0.005629	7	919	CDKN1A,FGF10,DAXX,ARAF,ADAM17,CTNNA1,TNFRSF1A
GO: Biological Process	GO:0030198	extracellular matrix organization		2.253e-05	0.03203	0.0007182	0.005629	5	354	TIMP2,ACAN,VCAN,MMP3,COL1A2
GO: Biological Process	GO:0046661	male sex differentiation		2.281e-05	0.03243	0.0007182	0.005629	4	169	FGF10,CCND1,CTNNA1,HSD17B3
GO: Biological Process	GO:0043062	extracellular structure organization		2.284e-05	0.03247	0.0007182	0.005629	5	355	TIMP2,ACAN,VCAN,MMP3,COL1A2
GO: Biological Process	GO:0033619	membrane protein proteolysis		2.284e-05	0.03248	0.0007182	0.005629	3	55	TIMP2,TIMP4,ADAM17
GO: Biological Process	GO:0007049	cell cycle		2.323e-05	0.03304	0.0007182	0.005629	9	1766	CDKN1A,CDKN1C,TIMP2,MSH6,FGF10,DAXX,CCND1,ADAM17,PTTG2
GO: Biological Process	GO:0097190	apoptotic signaling pathway		2.628e-05	0.03737	0.0007951	0.006231	6	626	CDKN1A,MSH6,FGF10,DAXX,CTNNA1,TNFRSF1A
GO: Biological Process	GO:0022402	cell cycle process		3.296e-05	0.04687	0.0009765	0.007653	8	1385	CDKN1A,CDKN1C,MSH6,FGF10,DAXX,CCND1,ADAM17,PTTG2
GO: Biological Process	GO:0060548	negative regulation of cell death		3.615e-05	0.0514	0.001041	0.008156	7	1001	CDKN1A,FGF10,DAXX,ARAF,ADAM17,CTNNA1,TNFRSF1A
GO: Biological Process	GO:0051347	positive regulation of transferase activity		3.693e-05	0.05251	0.001041	0.008156	6	665	CDKN1A,FGF10,DAXX,ARAF,CCND1,ADAM17
GO: Biological Process	GO:0051338	regulation of transferase activity		3.732e-05	0.05308	0.001041	0.008156	7	1006	CDKN1A,CDKN1C,FGF10,DAXX,ARAF,CCND1,ADAM17
GO: Biological Process	GO:0000278	mitotic cell cycle		3.977e-05	0.05656	0.001088	0.008525	7	1016	CDKN1A,CDKN1C,TIMP2,FGF10,DAXX,CCND1,ADAM17
GO: Biological Process	GO:0009725	response to hormone		4.425e-05	0.06292	0.001187	0.009304	7	1033	CDKN1A,TIMP2,TIMP4,FGF10,DAXX,CCND1,CTNNA1
GO: Biological Process	GO:0031099	regeneration		4.584e-05	0.06518	0.001207	0.00946	4	202	CDKN1A,FGF10,CCND1,CTNNA1
GO: Biological Process	GO:0006468	protein phosphorylation		5.199e-05	0.07393	0.001344	0.01053	9	1952	CDKN1A,CDKN1C,TIMP2,FGF10,DAXX,ARAF,CCND1,ADAM17,TNFRSF1A
GO: Biological Process	GO:0008285	negative regulation of cell proliferation		5.498e-05	0.07819	0.00138	0.01082	6	714	CDKN1A,CDKN1C,TIMP2,FGF10,CTNNA1,RUNX1
GO: Biological Process	GO:0009967	positive regulation of signal transduction		5.532e-05	0.07866	0.00138	0.01082	8	1488	CDKN1C,TIMP2,FGF10,DAXX,ARAF,ADAM17,CTNNA1,TNFRSF1A
GO: Biological Process	GO:0003006	developmental process involved in reproduction		6.128e-05	0.08713	0.001496	0.01172	6	728	CDKN1C,FGF10,CCND1,CTNNA1,RUNX1,HSD17B3
GO: Biological Process	GO:0032270	positive regulation of cellular protein metabolic process		6.205e-05	0.08824	0.001496	0.01172	8	1512	CDKN1A,TIMP2,FGF10,DAXX,ARAF,CCND1,ADAM17,TNFRSF1A
GO: Biological Process	GO:0071560	cellular response to transforming growth factor beta stimulus		7.594e-05	0.108	0.0018	0.0141	4	230	CDKN1C,ADAM17,RUNX1,COL1A2
GO: Biological Process	GO:0071559	response to transforming growth factor beta		7.985e-05	0.1135	0.001861	0.01459	4	233	CDKN1C,ADAM17,RUNX1,COL1A2
GO: Biological Process	GO:0043085	positive regulation of catalytic activity		8.811e-05	0.1253	0.002021	0.01584	8	1588	CDKN1A,TIMP2,MSH6,FGF10,DAXX,ARAF,CCND1,ADAM17
GO: Biological Process	GO:0042493	response to drug		9.699e-05	0.1379	0.002093	0.0164	5	481	CDKN1A,TIMP2,TIMP4,CCND1,ADAM17
GO: Biological Process	GO:0051247	positive regulation of protein metabolic process		9.761e-05	0.1388	0.002093	0.0164	8	1611	CDKN1A,TIMP2,FGF10,DAXX,ARAF,CCND1,ADAM17,TNFRSF1A
GO: Biological Process	GO:0045786	negative regulation of cell cycle		9.987e-05	0.142	0.002093	0.0164	5	484	CDKN1A,CDKN1C,TIMP2,FGF10,CCND1
GO: Biological Process	GO:0000082	G1/S transition of mitotic cell cycle		0.0001001	0.1423	0.002093	0.0164	4	247	CDKN1A,FGF10,CCND1,ADAM17
GO: Biological Process	GO:0097191	extrinsic apoptotic signaling pathway		0.0001001	0.1423	0.002093	0.0164	4	247	FGF10,DAXX,CTNNA1,TNFRSF1A
GO: Biological Process	GO:0007050	cell cycle arrest		0.0001001	0.1423	0.002093	0.0164	4	247	CDKN1A,CDKN1C,FGF10,CCND1
GO: Biological Process	GO:0022617	extracellular matrix disassembly		0.0001068	0.1518	0.0022	0.01724	3	92	TIMP2,ACAN,MMP3
GO: Biological Process	GO:0010941	regulation of cell death		0.0001157	0.1645	0.002336	0.01831	8	1650	CDKN1A,FGF10,DAXX,ARAF,ADAM17,CTNNA1,MMP3,TNFRSF1A
GO: Biological Process	GO:0044843	cell cycle G1/S phase transition		0.0001166	0.1659	0.002336	0.01831	4	257	CDKN1A,FGF10,CCND1,ADAM17
GO: Biological Process	GO:0001501	skeletal system development		0.000153	0.2176	0.003022	0.02368	5	530	CDKN1C,ACAN,VCAN,RUNX1,COL1A2
GO: Biological Process	GO:0010243	response to organonitrogen compound		0.00016	0.2276	0.003117	0.02443	6	866	CDKN1A,TIMP4,CCND1,CTNNA1,MMP3,COL1A2
GO: Biological Process	GO:0071156	regulation of cell cycle arrest		0.0001718	0.2443	0.003301	0.02587	3	108	CDKN1A,FGF10,CCND1
GO: Biological Process	GO:0071157	negative regulation of cell cycle arrest		0.0001853	0.2635	0.003514	0.02754	2	20	FGF10,CCND1
GO: Biological Process	GO:0008630	intrinsic apoptotic signaling pathway in response to DNA damage		0.0001913	0.272	0.003579	0.02805	3	112	CDKN1A,MSH6,TNFRSF1A
GO: Biological Process	GO:0051043	regulation of membrane protein ectodomain proteolysis		0.0002047	0.2911	0.003781	0.02963	2	21	TIMP2,TIMP4
GO: Biological Process	GO:0051094	positive regulation of developmental process		0.0002117	0.301	0.003859	0.03025	7	1323	TIMP2,MSH6,FGF10,CCND1,CTNNA1,TNFRSF1A,RUNX1
GO: Biological Process	GO:0033158	regulation of protein import into nucleus, translocation		0.000225	0.32	0.004043	0.03169	2	22	CDKN1A,TNFRSF1A
GO: Biological Process	GO:0048545	response to steroid hormone		0.0002274	0.3234	0.004043	0.03169	5	577	CDKN1A,FGF10,DAXX,CCND1,CTNNA1
GO: Biological Process	GO:1901990	regulation of mitotic cell cycle phase transition		0.000264	0.3755	0.004635	0.03633	4	318	CDKN1A,FGF10,CCND1,ADAM17
GO: Biological Process	GO:0071902	positive regulation of protein serine/threonine kinase activity		0.0002737	0.3891	0.004746	0.03719	4	321	FGF10,DAXX,CCND1,ADAM17
GO: Biological Process	GO:0042476	odontogenesis		0.0002901	0.4125	0.004824	0.03781	3	129	FGF10,CTNNA1,COL1A2
GO: Biological Process	GO:1903846	positive regulation of cellular response to transforming growth factor beta stimulus		0.0002917	0.4149	0.004824	0.03781	2	25	CDKN1C,ADAM17
GO: Biological Process	GO:0030539	male genitalia development		0.0002917	0.4149	0.004824	0.03781	2	25	FGF10,HSD17B3
GO: Biological Process	GO:0030511	positive regulation of transforming growth factor beta receptor signaling pathway		0.0002917	0.4149	0.004824	0.03781	2	25	CDKN1C,ADAM17
GO: Biological Process	GO:0044093	positive regulation of molecular function		0.0003032	0.4312	0.004956	0.03885	8	1893	CDKN1A,TIMP2,MSH6,FGF10,DAXX,ARAF,CCND1,ADAM17
GO: Biological Process	GO:0007265	Ras protein signal transduction		0.0003147	0.4475	0.005042	0.03952	4	333	CDKN1A,TIMP2,FGF10,COL1A2
GO: Biological Process	GO:1901698	response to nitrogen compound		0.0003156	0.4488	0.005042	0.03952	6	981	CDKN1A,TIMP4,CCND1,CTNNA1,MMP3,COL1A2
GO: Biological Process	GO:1901987	regulation of cell cycle phase transition		0.000333	0.4736	0.005241	0.04108	4	338	CDKN1A,FGF10,CCND1,ADAM17
GO: Biological Process	GO:0006915	apoptotic process		0.0003381	0.4808	0.005241	0.04108	8	1923	CDKN1A,MSH6,FGF10,DAXX,ARAF,ADAM17,CTNNA1,TNFRSF1A
GO: Biological Process	GO:0051412	response to corticosterone		0.0003409	0.4848	0.005241	0.04108	2	27	CDKN1A,CCND1
GO: Biological Process	GO:0032496	response to lipopolysaccharide		0.0003482	0.4952	0.005241	0.04108	4	342	TIMP4,FGF10,ADAM17,TNFRSF1A
GO: Biological Process	GO:0007178	transmembrane receptor protein serine/threonine kinase signaling pathway		0.0003521	0.5007	0.005241	0.04108	4	343	CDKN1C,FGF10,ADAM17,COL1A2
GO: Biological Process	GO:0042698	ovulation cycle		0.0003537	0.5029	0.005241	0.04108	3	138	TIMP4,CTNNA1,RUNX1
GO: Biological Process	GO:0007417	central nervous system development		0.0003538	0.5032	0.005241	0.04108	6	1002	TIMP2,TIMP4,FGF10,ACAN,VCAN,RUNX1
GO: Biological Process	GO:0051726	regulation of cell cycle		0.0003654	0.5196	0.005339	0.04184	6	1008	CDKN1A,CDKN1C,TIMP2,FGF10,CCND1,ADAM17
GO: Biological Process	GO:0009411	response to UV		0.0003689	0.5246	0.005339	0.04184	3	140	CDKN1A,MSH6,CCND1
GO: Biological Process	GO:0012501	programmed cell death		0.000375	0.5332	0.005339	0.04184	8	1952	CDKN1A,MSH6,FGF10,DAXX,ARAF,ADAM17,CTNNA1,TNFRSF1A
GO: Biological Process	GO:0071363	cellular response to growth factor stimulus		0.0003755	0.5339	0.005339	0.04184	5	643	CDKN1C,FGF10,ADAM17,RUNX1,COL1A2
GO: Biological Process	GO:0045787	positive regulation of cell cycle		0.0003885	0.5524	0.005469	0.04286	4	352	CDKN1A,FGF10,CCND1,ADAM17
GO: Biological Process	GO:0002237	response to molecule of bacterial origin		0.0004141	0.5889	0.005759	0.04514	4	358	TIMP4,FGF10,ADAM17,TNFRSF1A
GO: Biological Process	GO:0046660	female sex differentiation		0.0004172	0.5932	0.005759	0.04514	3	146	FGF10,CTNNA1,RUNX1
GO: Biological Process	GO:0031069	hair follicle morphogenesis		0.0004505	0.6407	0.00616	0.04828	2	31	FGF10,RUNX1
GO: Biological Process	GO:0070848	response to growth factor		0.0004567	0.6495	0.006175	0.0484	5	671	CDKN1C,FGF10,ADAM17,RUNX1,COL1A2
GO: Biological Process	GO:0051291	protein heterooligomerization		0.0004603	0.6546	0.006175	0.0484	3	151	CTNNA1,TNFRSF1A,COL1A2
GO: Biological Process	GO:0048585	negative regulation of response to stimulus		0.0004944	0.7031	0.006536	0.05123	7	1518	TIMP2,FGF10,CCND1,ADAM17,CTNNA1,MMP3,TNFRSF1A
GO: Biological Process	GO:0042981	regulation of apoptotic process		0.0004964	0.7059	0.006536	0.05123	7	1519	CDKN1A,FGF10,DAXX,ARAF,ADAM17,CTNNA1,TNFRSF1A
GO: Biological Process	GO:0010165	response to X-ray		0.000511	0.7266	0.006666	0.05224	2	33	CDKN1A,CCND1
GO: Biological Process	GO:0043067	regulation of programmed cell death		0.0005313	0.7555	0.006811	0.05338	7	1536	CDKN1A,FGF10,DAXX,ARAF,ADAM17,CTNNA1,TNFRSF1A
GO: Biological Process	GO:0045596	negative regulation of cell differentiation		0.0005329	0.7578	0.006811	0.05338	5	694	FGF10,DAXX,CCND1,CTNNA1,RUNX1
GO: Biological Process	GO:0010942	positive regulation of cell death		0.0005365	0.7628	0.006811	0.05338	5	695	CDKN1A,DAXX,CTNNA1,MMP3,TNFRSF1A
GO: Biological Process	GO:0055123	digestive system development		0.0005962	0.8478	0.007503	0.0588	3	165	CDKN1A,CDKN1C,FGF10
GO: Biological Process	GO:0048730	epidermis morphogenesis		0.0006086	0.8654	0.007525	0.05898	2	36	FGF10,RUNX1
GO: Biological Process	GO:0051385	response to mineralocorticoid		0.0006086	0.8654	0.007525	0.05898	2	36	CDKN1A,CCND1
GO: Biological Process	GO:0097305	response to alcohol		0.0006175	0.878	0.007569	0.05932	4	398	CDKN1A,FGF10,CCND1,CTNNA1
GO: Biological Process	GO:2001240	negative regulation of extrinsic apoptotic signaling pathway in absence of ligand		0.0006783	0.9645	0.008174	0.06406	2	38	FGF10,CTNNA1
GO: Biological Process	GO:1901099	negative regulation of signal transduction in absence of ligand		0.0006783	0.9645	0.008174	0.06406	2	38	FGF10,CTNNA1
GO: Biological Process	GO:0051240	positive regulation of multicellular organismal process		0.000707	1	0.008448	0.06621	7	1610	TIMP2,MSH6,FGF10,CCND1,ADAM17,TNFRSF1A,RUNX1
GO: Biological Process	GO:0048469	cell maturation		0.0007193	1	0.008523	0.0668	3	176	CDKN1A,CDKN1C,RUNX1
GO: Biological Process	GO:0050731	positive regulation of peptidyl-tyrosine phosphorylation		0.0007312	1	0.008523	0.0668	3	177	FGF10,ADAM17,TNFRSF1A
GO: Biological Process	GO:0007219	Notch signaling pathway		0.0007312	1	0.008523	0.0668	3	177	TIMP4,FGF10,ADAM17
GO: Biological Process	GO:0044273	sulfur compound catabolic process		0.0007516	1	0.00869	0.0681	2	40	ACAN,VCAN
GO: Biological Process	GO:0007179	transforming growth factor beta receptor signaling pathway		0.0008183	1	0.009384	0.07355	3	184	CDKN1C,ADAM17,COL1A2
GO: Biological Process	GO:0009968	negative regulation of signal transduction		0.0008508	1	0.009679	0.07585	6	1181	TIMP2,FGF10,CCND1,ADAM17,CTNNA1,MMP3
GO: Biological Process	GO:0006508	proteolysis		0.0009704	1	0.01039	0.0814	7	1697	TIMP2,TIMP4,ACAN,ARAF,ADAM17,PTTG2,MMP3
GO: Biological Process	GO:0045595	regulation of cell differentiation		0.0009773	1	0.01039	0.0814	7	1699	TIMP2,FGF10,DAXX,CCND1,CTNNA1,TNFRSF1A,RUNX1
GO: Biological Process	GO:0009628	response to abiotic stimulus		0.0009922	1	0.01039	0.0814	6	1216	CDKN1A,MSH6,DAXX,CCND1,ADAM17,TNFRSF1A
GO: Biological Process	GO:0006974	cellular response to DNA damage stimulus		0.001016	1	0.01039	0.0814	5	800	CDKN1A,MSH6,FGF10,CCND1,TNFRSF1A
GO: Biological Process	GO:0060432	lung pattern specification process		0.001021	1	0.01039	0.0814	1	1	FGF10
GO: Biological Process	GO:0050675	regulation of urothelial cell proliferation		0.001021	1	0.01039	0.0814	1	1	FGF10
GO: Biological Process	GO:0060879	semicircular canal fusion		0.001021	1	0.01039	0.0814	1	1	FGF10
GO: Biological Process	GO:0060436	bronchiole morphogenesis		0.001021	1	0.01039	0.0814	1	1	FGF10
GO: Biological Process	GO:0070352	positive regulation of white fat cell proliferation		0.001021	1	0.01039	0.0814	1	1	FGF10
GO: Biological Process	GO:0060495	cell-cell signaling involved in lung development		0.001021	1	0.01039	0.0814	1	1	FGF10
GO: Biological Process	GO:0050674	urothelial cell proliferation		0.001021	1	0.01039	0.0814	1	1	FGF10
GO: Biological Process	GO:0050677	positive regulation of urothelial cell proliferation		0.001021	1	0.01039	0.0814	1	1	FGF10
GO: Biological Process	GO:0061115	lung proximal/distal axis specification		0.001021	1	0.01039	0.0814	1	1	FGF10
GO: Biological Process	GO:0060496	mesenchymal-epithelial cell signaling involved in lung development		0.001021	1	0.01039	0.0814	1	1	FGF10
GO: Biological Process	GO:0009057	macromolecule catabolic process		0.001023	1	0.01039	0.0814	6	1223	TIMP2,TIMP4,ACAN,ARAF,VCAN,MMP3
GO: Biological Process	GO:0048536	spleen development		0.001037	1	0.01046	0.08199	2	47	FGF10,ADAM17
GO: Biological Process	GO:0034097	response to cytokine		0.001166	1	0.01167	0.09144	5	825	TIMP2,TIMP4,DAXX,ADAM17,TNFRSF1A
GO: Biological Process	GO:0048806	genitalia development		0.001173	1	0.01167	0.09144	2	50	FGF10,HSD17B3
GO: Biological Process	GO:2001239	regulation of extrinsic apoptotic signaling pathway in absence of ligand		0.001317	1	0.01292	0.1013	2	53	FGF10,CTNNA1
GO: Biological Process	GO:0000060	protein import into nucleus, translocation		0.001317	1	0.01292	0.1013	2	53	CDKN1A,TNFRSF1A
GO: Biological Process	GO:0060429	epithelium development		0.001384	1	0.01348	0.1057	6	1296	CDKN1A,FGF10,CCND1,ADAM17,TNFRSF1A,RUNX1
GO: Biological Process	GO:0090092	regulation of transmembrane receptor protein serine/threonine kinase signaling pathway		0.001406	1	0.0136	0.1066	3	222	CDKN1C,FGF10,ADAM17
GO: Biological Process	GO:0045930	negative regulation of mitotic cell cycle		0.001462	1	0.01403	0.1099	3	225	CDKN1A,TIMP2,CCND1
GO: Biological Process	GO:0023057	negative regulation of signaling		0.00147	1	0.01403	0.1099	6	1311	TIMP2,FGF10,CCND1,ADAM17,CTNNA1,MMP3
GO: Biological Process	GO:0048732	gland development		0.001487	1	0.0141	0.1105	4	504	CDKN1C,FGF10,CCND1,RUNX1
GO: Biological Process	GO:0045935	positive regulation of nucleobase-containing compound metabolic process		0.00153	1	0.01433	0.1123	7	1832	CDKN1C,TIMP2,MSH6,FGF10,DAXX,TNFRSF1A,RUNX1
GO: Biological Process	GO:0043086	negative regulation of catalytic activity		0.001532	1	0.01433	0.1123	5	877	CDKN1A,CDKN1C,TIMP2,TIMP4,PTTG2
GO: Biological Process	GO:0010648	negative regulation of cell communication		0.001571	1	0.0146	0.1145	6	1328	TIMP2,FGF10,CCND1,ADAM17,CTNNA1,MMP3
GO: Biological Process	GO:0043627	response to estrogen		0.001635	1	0.0151	0.1184	3	234	FGF10,CCND1,CTNNA1
GO: Biological Process	GO:0043410	positive regulation of MAPK cascade		0.001692	1	0.01552	0.1216	4	522	TIMP2,FGF10,DAXX,ARAF
GO: Biological Process	GO:0006027	glycosaminoglycan catabolic process		0.001741	1	0.01582	0.124	2	61	ACAN,VCAN
GO: Biological Process	GO:0010948	negative regulation of cell cycle process		0.001758	1	0.01582	0.124	3	240	CDKN1A,FGF10,CCND1
GO: Biological Process	GO:0050730	regulation of peptidyl-tyrosine phosphorylation		0.001758	1	0.01582	0.124	3	240	FGF10,ADAM17,TNFRSF1A
GO: Biological Process	GO:0044772	mitotic cell cycle phase transition		0.001777	1	0.01589	0.1245	4	529	CDKN1A,FGF10,CCND1,ADAM17
GO: Biological Process	GO:0051093	negative regulation of developmental process		0.00184	1	0.0162	0.127	5	914	FGF10,DAXX,CCND1,CTNNA1,RUNX1
GO: Biological Process	GO:2000026	regulation of multicellular organismal development		0.001855	1	0.0162	0.127	7	1893	TIMP2,MSH6,FGF10,CCND1,CTNNA1,TNFRSF1A,RUNX1
GO: Biological Process	GO:0071356	cellular response to tumor necrosis factor		0.001865	1	0.0162	0.127	3	245	DAXX,ADAM17,TNFRSF1A
GO: Biological Process	GO:0051259	protein complex oligomerization		0.001903	1	0.0162	0.127	4	539	CTNNA1,MMP3,TNFRSF1A,COL1A2
GO: Biological Process	GO:0051336	regulation of hydrolase activity		0.001909	1	0.0162	0.127	6	1379	TIMP2,TIMP4,MSH6,FGF10,VCAN,PTTG2
GO: Biological Process	GO:0071230	cellular response to amino acid stimulus		0.001974	1	0.0162	0.127	2	65	MMP3,COL1A2
GO: Biological Process	GO:1903047	mitotic cell cycle process		0.001997	1	0.0162	0.127	5	931	CDKN1A,FGF10,DAXX,CCND1,ADAM17
GO: Biological Process	GO:0008406	gonad development		0.001998	1	0.0162	0.127	3	251	CCND1,CTNNA1,RUNX1
GO: Biological Process	GO:0060667	branch elongation involved in salivary gland morphogenesis		0.00204	1	0.0162	0.127	1	2	FGF10
GO: Biological Process	GO:0060876	semicircular canal formation		0.00204	1	0.0162	0.127	1	2	FGF10
GO: Biological Process	GO:0060915	mesenchymal cell differentiation involved in lung development		0.00204	1	0.0162	0.127	1	2	FGF10
GO: Biological Process	GO:0060615	mammary gland bud formation		0.00204	1	0.0162	0.127	1	2	FGF10
GO: Biological Process	GO:0060595	fibroblast growth factor receptor signaling pathway involved in mammary gland specification		0.00204	1	0.0162	0.127	1	2	FGF10
GO: Biological Process	GO:0061033	secretion by lung epithelial cell involved in lung growth		0.00204	1	0.0162	0.127	1	2	FGF10
GO: Biological Process	GO:0060661	submandibular salivary gland formation		0.00204	1	0.0162	0.127	1	2	FGF10
GO: Biological Process	GO:0071454	cellular response to anoxia		0.00204	1	0.0162	0.127	1	2	DAXX
GO: Biological Process	GO:2001045	negative regulation of integrin-mediated signaling pathway		0.00204	1	0.0162	0.127	1	2	CTNNA1
GO: Biological Process	GO:0071338	positive regulation of hair follicle cell proliferation		0.00204	1	0.0162	0.127	1	2	FGF10
GO: Biological Process	GO:2000872	positive regulation of progesterone secretion		0.00204	1	0.0162	0.127	1	2	RUNX1
GO: Biological Process	GO:0070075	tear secretion		0.00204	1	0.0162	0.127	1	2	FGF10
GO: Biological Process	GO:0048146	positive regulation of fibroblast proliferation		0.002096	1	0.01634	0.1281	2	67	CDKN1A,FGF10
GO: Biological Process	GO:0030574	collagen catabolic process		0.002096	1	0.01634	0.1281	2	67	MMP3,COL1A2
GO: Biological Process	GO:0045137	development of primary sexual characteristics		0.002114	1	0.01634	0.1281	3	256	CCND1,CTNNA1,RUNX1
GO: Biological Process	GO:0090287	regulation of cellular response to growth factor stimulus		0.002114	1	0.01634	0.1281	3	256	CDKN1C,FGF10,ADAM17
GO: Biological Process	GO:0044770	cell cycle phase transition		0.002117	1	0.01634	0.1281	4	555	CDKN1A,FGF10,CCND1,ADAM17
GO: Biological Process	GO:0010466	negative regulation of peptidase activity		0.002137	1	0.01634	0.1281	3	257	TIMP2,TIMP4,PTTG2
GO: Biological Process	GO:0042113	B cell activation		0.002137	1	0.01634	0.1281	3	257	CDKN1A,MSH6,ADAM17
GO: Biological Process	GO:0006026	aminoglycan catabolic process		0.002158	1	0.01634	0.1281	2	68	ACAN,VCAN
GO: Biological Process	GO:0051173	positive regulation of nitrogen compound metabolic process		0.002167	1	0.01634	0.1281	7	1944	CDKN1C,TIMP2,MSH6,FGF10,DAXX,TNFRSF1A,RUNX1
GO: Biological Process	GO:0002520	immune system development		0.002172	1	0.01634	0.1281	5	949	CDKN1C,MSH6,FGF10,ADAM17,RUNX1
GO: Biological Process	GO:1902533	positive regulation of intracellular signal transduction		0.002265	1	0.01691	0.1325	5	958	TIMP2,FGF10,DAXX,ARAF,TNFRSF1A
GO: Biological Process	GO:0051674	localization of cell		0.002283	1	0.01691	0.1325	6	1428	FGF10,ADAM17,VCAN,CTNNA1,MMP3,COL1A2
GO: Biological Process	GO:0048870	cell motility		0.002283	1	0.01691	0.1325	6	1428	FGF10,ADAM17,VCAN,CTNNA1,MMP3,COL1A2
GO: Biological Process	GO:0008589	regulation of smoothened signaling pathway		0.00235	1	0.01729	0.1355	2	71	FGF10,CTNNA1
GO: Biological Process	GO:0009611	response to wounding		0.002359	1	0.01729	0.1355	5	967	FGF10,ADAM17,CTNNA1,TNFRSF1A,COL1A2
GO: Biological Process	GO:0034612	response to tumor necrosis factor		0.002382	1	0.01737	0.1361	3	267	DAXX,ADAM17,TNFRSF1A
GO: Biological Process	GO:0002684	positive regulation of immune system process		0.002457	1	0.01783	0.1397	5	976	CDKN1A,MSH6,FGF10,ADAM17,RUNX1
GO: Biological Process	GO:0044819	mitotic G1/S transition checkpoint		0.002482	1	0.01783	0.1397	2	73	CDKN1A,CCND1
GO: Biological Process	GO:0031571	mitotic G1 DNA damage checkpoint		0.002482	1	0.01783	0.1397	2	73	CDKN1A,CCND1
GO: Biological Process	GO:0044783	G1 DNA damage checkpoint		0.00255	1	0.01822	0.1428	2	74	CDKN1A,CCND1
GO: Biological Process	GO:0021700	developmental maturation		0.00259	1	0.01842	0.1443	3	275	CDKN1A,CDKN1C,RUNX1
GO: Biological Process	GO:0007264	small GTPase mediated signal transduction		0.002613	1	0.01848	0.1449	4	588	CDKN1A,TIMP2,FGF10,COL1A2
GO: Biological Process	GO:0009617	response to bacterium		0.002645	1	0.01862	0.1459	4	590	TIMP4,FGF10,ADAM17,TNFRSF1A
GO: Biological Process	GO:0043588	skin development		0.002671	1	0.01871	0.1466	3	278	FGF10,RUNX1,COL1A2
GO: Biological Process	GO:0001775	cell activation		0.002745	1	0.01913	0.1499	5	1001	CDKN1A,MSH6,FGF10,ADAM17,COL1A2
GO: Biological Process	GO:0010564	regulation of cell cycle process		0.002777	1	0.01927	0.151	4	598	CDKN1A,FGF10,CCND1,ADAM17
GO: Biological Process	GO:0061180	mammary gland epithelium development		0.002972	1	0.02013	0.1578	2	80	FGF10,CCND1
GO: Biological Process	GO:0002682	regulation of immune system process		0.002993	1	0.02013	0.1578	6	1506	CDKN1A,MSH6,FGF10,ADAM17,RUNX1,COL1A2
GO: Biological Process	GO:0070384	Harderian gland development		0.003058	1	0.02013	0.1578	1	3	FGF10
GO: Biological Process	GO:0060435	bronchiole development		0.003058	1	0.02013	0.1578	1	3	FGF10
GO: Biological Process	GO:0070350	regulation of white fat cell proliferation		0.003058	1	0.02013	0.1578	1	3	FGF10
GO: Biological Process	GO:0051088	PMA-inducible membrane protein ectodomain proteolysis		0.003058	1	0.02013	0.1578	1	3	ADAM17
GO: Biological Process	GO:0032487	regulation of Rap protein signal transduction		0.003058	1	0.02013	0.1578	1	3	TIMP2
GO: Biological Process	GO:2000870	regulation of progesterone secretion		0.003058	1	0.02013	0.1578	1	3	RUNX1
GO: Biological Process	GO:0070346	positive regulation of fat cell proliferation		0.003058	1	0.02013	0.1578	1	3	FGF10
GO: Biological Process	GO:0070343	white fat cell proliferation		0.003058	1	0.02013	0.1578	1	3	FGF10
GO: Biological Process	GO:0048807	female genitalia morphogenesis		0.003058	1	0.02013	0.1578	1	3	FGF10
GO: Biological Process	GO:0038034	signal transduction in absence of ligand		0.003195	1	0.02084	0.1633	2	83	FGF10,CTNNA1
GO: Biological Process	GO:0097192	extrinsic apoptotic signaling pathway in absence of ligand		0.003195	1	0.02084	0.1633	2	83	FGF10,CTNNA1
GO: Biological Process	GO:0014070	response to organic cyclic compound		0.00331	1	0.02149	0.1684	5	1045	CDKN1A,FGF10,DAXX,CCND1,CTNNA1
GO: Biological Process	GO:0097193	intrinsic apoptotic signaling pathway		0.003343	1	0.02161	0.1694	3	301	CDKN1A,MSH6,TNFRSF1A
GO: Biological Process	GO:0072358	cardiovascular system development		0.003492	1	0.02237	0.1753	5	1058	FGF10,VCAN,TNFRSF1A,RUNX1,COL1A2
GO: Biological Process	GO:0072359	circulatory system development		0.003492	1	0.02237	0.1753	5	1058	FGF10,VCAN,TNFRSF1A,RUNX1,COL1A2
GO: Biological Process	GO:0051251	positive regulation of lymphocyte activation		0.003665	1	0.02337	0.1832	3	311	CDKN1A,MSH6,FGF10
GO: Biological Process	GO:0031100	animal organ regeneration		0.003744	1	0.02347	0.1839	2	90	CDKN1A,CCND1
GO: Biological Process	GO:1901216	positive regulation of neuron death		0.003744	1	0.02347	0.1839	2	90	DAXX,TNFRSF1A
GO: Biological Process	GO:0001568	blood vessel development		0.003772	1	0.02347	0.1839	4	651	FGF10,TNFRSF1A,RUNX1,COL1A2
GO: Biological Process	GO:0032147	activation of protein kinase activity		0.003833	1	0.02347	0.1839	3	316	FGF10,DAXX,ARAF
GO: Biological Process	GO:0043068	positive regulation of programmed cell death		0.003855	1	0.02347	0.1839	4	655	CDKN1A,DAXX,CTNNA1,TNFRSF1A
GO: Biological Process	GO:0042475	odontogenesis of dentin-containing tooth		0.003908	1	0.02347	0.1839	2	92	FGF10,CTNNA1
GO: Biological Process	GO:0040007	growth		0.003987	1	0.02347	0.1839	5	1091	CDKN1A,CDKN1C,FGF10,DAXX,ADAM17
GO: Biological Process	GO:0050871	positive regulation of B cell activation		0.003992	1	0.02347	0.1839	2	93	CDKN1A,MSH6
GO: Biological Process	GO:0008625	extrinsic apoptotic signaling pathway via death domain receptors		0.003992	1	0.02347	0.1839	2	93	DAXX,TNFRSF1A
GO: Biological Process	GO:0030855	epithelial cell differentiation		0.004005	1	0.02347	0.1839	4	662	CDKN1A,FGF10,CCND1,TNFRSF1A
GO: Biological Process	GO:0033023	mast cell homeostasis		0.004075	1	0.02347	0.1839	1	4	ADAM17
GO: Biological Process	GO:0009946	proximal/distal axis specification		0.004075	1	0.02347	0.1839	1	4	FGF10
GO: Biological Process	GO:0000320	re-entry into mitotic cell cycle		0.004075	1	0.02347	0.1839	1	4	CCND1
GO: Biological Process	GO:2000196	positive regulation of female gonad development		0.004075	1	0.02347	0.1839	1	4	RUNX1
GO: Biological Process	GO:0060437	lung growth		0.004075	1	0.02347	0.1839	1	4	FGF10
GO: Biological Process	GO:0060648	mammary gland bud morphogenesis		0.004075	1	0.02347	0.1839	1	4	FGF10
GO: Biological Process	GO:0033025	regulation of mast cell apoptotic process		0.004075	1	0.02347	0.1839	1	4	ADAM17
GO: Biological Process	GO:0060594	mammary gland specification		0.004075	1	0.02347	0.1839	1	4	FGF10
GO: Biological Process	GO:0060574	intestinal epithelial cell maturation		0.004075	1	0.02347	0.1839	1	4	CDKN1A
GO: Biological Process	GO:0034059	response to anoxia		0.004075	1	0.02347	0.1839	1	4	DAXX
GO: Biological Process	GO:0030538	embryonic genitalia morphogenesis		0.004075	1	0.02347	0.1839	1	4	FGF10
GO: Biological Process	GO:0060447	bud outgrowth involved in lung branching		0.004075	1	0.02347	0.1839	1	4	FGF10
GO: Biological Process	GO:0033024	mast cell apoptotic process		0.004075	1	0.02347	0.1839	1	4	ADAM17
GO: Biological Process	GO:0050678	regulation of epithelial cell proliferation		0.004076	1	0.02347	0.1839	3	323	CDKN1C,FGF10,CCND1
GO: Biological Process	GO:0032941	secretion by tissue		0.004161	1	0.02386	0.187	2	95	FGF10,CCND1
GO: Biological Process	GO:0032103	positive regulation of response to external stimulus		0.004255	1	0.0243	0.1905	3	328	FGF10,ADAM17,TNFRSF1A
GO: Biological Process	GO:0032269	negative regulation of cellular protein metabolic process		0.004327	1	0.02458	0.1926	5	1112	CDKN1A,CDKN1C,TIMP2,TIMP4,PTTG2
GO: Biological Process	GO:0001944	vasculature development		0.004339	1	0.02458	0.1926	4	677	FGF10,TNFRSF1A,RUNX1,COL1A2
GO: Biological Process	GO:0010629	negative regulation of gene expression		0.004412	1	0.02478	0.1942	6	1627	CDKN1A,CDKN1C,DAXX,CCND1,TNFRSF1A,RUNX1
GO: Biological Process	GO:2000134	negative regulation of G1/S transition of mitotic cell cycle		0.004422	1	0.02478	0.1942	2	98	CDKN1A,CCND1
GO: Biological Process	GO:0022008	neurogenesis		0.004426	1	0.02478	0.1942	6	1628	CDKN1C,TIMP2,FGF10,VCAN,CTNNA1,RUNX1
GO: Biological Process	GO:0022404	molting cycle process		0.00451	1	0.02495	0.1956	2	99	FGF10,RUNX1
GO: Biological Process	GO:0022405	hair cycle process		0.00451	1	0.02495	0.1956	2	99	FGF10,RUNX1
GO: Biological Process	GO:0001942	hair follicle development		0.00451	1	0.02495	0.1956	2	99	FGF10,RUNX1
GO: Biological Process	GO:0009416	response to light stimulus		0.00459	1	0.0253	0.1983	3	337	CDKN1A,MSH6,CCND1
GO: Biological Process	GO:0070482	response to oxygen levels		0.004628	1	0.02535	0.1987	3	338	CDKN1A,DAXX,ADAM17
GO: Biological Process	GO:0044773	mitotic DNA damage checkpoint		0.004689	1	0.02535	0.1987	2	101	CDKN1A,CCND1
GO: Biological Process	GO:0098773	skin epidermis development		0.004689	1	0.02535	0.1987	2	101	FGF10,RUNX1
GO: Biological Process	GO:1902807	negative regulation of cell cycle G1/S phase transition		0.004689	1	0.02535	0.1987	2	101	CDKN1A,CCND1
GO: Biological Process	GO:0048145	regulation of fibroblast proliferation		0.004689	1	0.02535	0.1987	2	101	CDKN1A,FGF10
GO: Biological Process	GO:0002696	positive regulation of leukocyte activation		0.004743	1	0.02555	0.2002	3	341	CDKN1A,MSH6,FGF10
GO: Biological Process	GO:0007127	meiosis I		0.004872	1	0.02595	0.2034	2	103	MSH6,PTTG2
GO: Biological Process	GO:0048144	fibroblast proliferation		0.004964	1	0.02595	0.2034	2	104	CDKN1A,FGF10
GO: Biological Process	GO:1903844	regulation of cellular response to transforming growth factor beta stimulus		0.005058	1	0.02595	0.2034	2	105	CDKN1C,ADAM17
GO: Biological Process	GO:0090100	positive regulation of transmembrane receptor protein serine/threonine kinase signaling pathway		0.005058	1	0.02595	0.2034	2	105	CDKN1C,ADAM17
GO: Biological Process	GO:0007589	body fluid secretion		0.005058	1	0.02595	0.2034	2	105	FGF10,CCND1
GO: Biological Process	GO:0017015	regulation of transforming growth factor beta receptor signaling pathway		0.005058	1	0.02595	0.2034	2	105	CDKN1C,ADAM17
GO: Biological Process	GO:0071680	response to indole-3-methanol		0.005091	1	0.02595	0.2034	1	5	CTNNA1
GO: Biological Process	GO:0060665	regulation of branching involved in salivary gland morphogenesis by mesenchymal-epithelial signaling		0.005091	1	0.02595	0.2034	1	5	FGF10
GO: Biological Process	GO:0035624	receptor transactivation		0.005091	1	0.02595	0.2034	1	5	ADAM17
GO: Biological Process	GO:0000710	meiotic mismatch repair		0.005091	1	0.02595	0.2034	1	5	MSH6
GO: Biological Process	GO:0048808	male genitalia morphogenesis		0.005091	1	0.02595	0.2034	1	5	FGF10
GO: Biological Process	GO:0043570	maintenance of DNA repeat elements		0.005091	1	0.02595	0.2034	1	5	MSH6
GO: Biological Process	GO:0071681	cellular response to indole-3-methanol		0.005091	1	0.02595	0.2034	1	5	CTNNA1
GO: Biological Process	GO:0042701	progesterone secretion		0.005091	1	0.02595	0.2034	1	5	RUNX1
GO: Biological Process	GO:0090598	male anatomical structure morphogenesis		0.005091	1	0.02595	0.2034	1	5	FGF10
GO: Biological Process	GO:0046649	lymphocyte activation		0.005113	1	0.02595	0.2034	4	709	CDKN1A,MSH6,FGF10,ADAM17
GO: Biological Process	GO:0044092	negative regulation of molecular function		0.005127	1	0.02595	0.2034	5	1157	CDKN1A,CDKN1C,TIMP2,TIMP4,PTTG2
GO: Biological Process	GO:0044774	mitotic DNA integrity checkpoint		0.005247	1	0.02645	0.2073	2	107	CDKN1A,CCND1
GO: Biological Process	GO:0050867	positive regulation of cell activation		0.005264	1	0.02645	0.2073	3	354	CDKN1A,MSH6,FGF10
GO: Biological Process	GO:0043405	regulation of MAP kinase activity		0.005347	1	0.02677	0.2098	3	356	FGF10,DAXX,ARAF
GO: Biological Process	GO:0022602	ovulation cycle process		0.005537	1	0.02762	0.2165	2	110	CTNNA1,RUNX1
GO: Biological Process	GO:0051248	negative regulation of protein metabolic process		0.005636	1	0.02802	0.2196	5	1183	CDKN1A,CDKN1C,TIMP2,TIMP4,PTTG2
GO: Biological Process	GO:0048511	rhythmic process		0.005775	1	0.02851	0.2235	3	366	TIMP4,CTNNA1,RUNX1
GO: Biological Process	GO:0045861	negative regulation of proteolysis		0.005775	1	0.02851	0.2235	3	366	TIMP2,TIMP4,PTTG2
GO: Biological Process	GO:0043408	regulation of MAPK cascade		0.005808	1	0.02858	0.224	4	735	TIMP2,FGF10,DAXX,ARAF
GO: Biological Process	GO:2001237	negative regulation of extrinsic apoptotic signaling pathway		0.005833	1	0.0286	0.2242	2	113	FGF10,CTNNA1
GO: Biological Process	GO:0051052	regulation of DNA metabolic process		0.005862	1	0.02865	0.2245	3	368	CDKN1A,MSH6,FGF10
GO: Biological Process	GO:0006024	glycosaminoglycan biosynthetic process		0.006035	1	0.02924	0.2292	2	115	ACAN,VCAN
GO: Biological Process	GO:0001101	response to acid chemical		0.006041	1	0.02924	0.2292	3	372	MMP3,RUNX1,COL1A2
GO: Biological Process	GO:0040011	locomotion		0.006063	1	0.02924	0.2292	6	1735	FGF10,ADAM17,VCAN,CTNNA1,MMP3,COL1A2
GO: Biological Process	GO:0030578	PML body organization		0.006107	1	0.02924	0.2292	1	6	DAXX
GO: Biological Process	GO:0051096	positive regulation of helicase activity		0.006107	1	0.02924	0.2292	1	6	MSH6
GO: Biological Process	GO:0061370	testosterone biosynthetic process		0.006107	1	0.02924	0.2292	1	6	HSD17B3
GO: Biological Process	GO:0006023	aminoglycan biosynthetic process		0.006138	1	0.02929	0.2295	2	116	ACAN,VCAN
GO: Biological Process	GO:1903510	mucopolysaccharide metabolic process		0.006344	1	0.03017	0.2365	2	118	ACAN,VCAN
GO: Biological Process	GO:0030162	regulation of proteolysis		0.006534	1	0.03086	0.2419	4	760	TIMP2,TIMP4,ARAF,PTTG2
GO: Biological Process	GO:0042303	molting cycle		0.006554	1	0.03086	0.2419	2	120	FGF10,RUNX1
GO: Biological Process	GO:0042633	hair cycle		0.006554	1	0.03086	0.2419	2	120	FGF10,RUNX1
GO: Biological Process	GO:0018108	peptidyl-tyrosine phosphorylation		0.006642	1	0.03117	0.2443	3	385	FGF10,ADAM17,TNFRSF1A
GO: Biological Process	GO:0018212	peptidyl-tyrosine modification		0.006738	1	0.03152	0.247	3	387	FGF10,ADAM17,TNFRSF1A
GO: Biological Process	GO:0032963	collagen metabolic process		0.006767	1	0.03155	0.2473	2	122	MMP3,COL1A2
GO: Biological Process	GO:1902531	regulation of intracellular signal transduction		0.006891	1	0.03203	0.251	6	1781	TIMP2,FGF10,DAXX,ARAF,MMP3,TNFRSF1A
GO: Biological Process	GO:0050673	epithelial cell proliferation		0.006932	1	0.03211	0.2516	3	391	CDKN1C,FGF10,CCND1
GO: Biological Process	GO:0010727	negative regulation of hydrogen peroxide metabolic process		0.007121	1	0.03235	0.2536	1	7	MMP3
GO: Biological Process	GO:0046877	regulation of saliva secretion		0.007121	1	0.03235	0.2536	1	7	FGF10
GO: Biological Process	GO:0060664	epithelial cell proliferation involved in salivary gland morphogenesis		0.007121	1	0.03235	0.2536	1	7	FGF10
GO: Biological Process	GO:0060510	type II pneumocyte differentiation		0.007121	1	0.03235	0.2536	1	7	FGF10
GO: Biological Process	GO:0060449	bud elongation involved in lung branching		0.007121	1	0.03235	0.2536	1	7	FGF10
GO: Biological Process	GO:0007406	negative regulation of neuroblast proliferation		0.007121	1	0.03235	0.2536	1	7	CTNNA1
GO: Biological Process	GO:0008585	female gonad development		0.007203	1	0.03262	0.2556	2	126	CTNNA1,RUNX1
GO: Biological Process	GO:0043200	response to amino acid		0.007537	1	0.03403	0.2667	2	129	MMP3,COL1A2
GO: Biological Process	GO:2000145	regulation of cell motility		0.007582	1	0.03412	0.2674	4	793	FGF10,ADAM17,CTNNA1,MMP3
GO: Biological Process	GO:0007224	smoothened signaling pathway		0.00765	1	0.03421	0.2681	2	130	FGF10,CTNNA1
GO: Biological Process	GO:0050921	positive regulation of chemotaxis		0.00765	1	0.03421	0.2681	2	130	FGF10,ADAM17
GO: Biological Process	GO:0046545	development of primary female sexual characteristics		0.007764	1	0.03422	0.2682	2	131	CTNNA1,RUNX1
GO: Biological Process	GO:0042177	negative regulation of protein catabolic process		0.007764	1	0.03422	0.2682	2	131	TIMP2,TIMP4
GO: Biological Process	GO:2001233	regulation of apoptotic signaling pathway		0.007845	1	0.03422	0.2682	3	409	FGF10,DAXX,CTNNA1
GO: Biological Process	GO:0045931	positive regulation of mitotic cell cycle		0.007879	1	0.03422	0.2682	2	132	FGF10,CCND1
GO: Biological Process	GO:0045766	positive regulation of angiogenesis		0.007994	1	0.03422	0.2682	2	133	TNFRSF1A,RUNX1
GO: Biological Process	GO:0050864	regulation of B cell activation		0.007994	1	0.03422	0.2682	2	133	CDKN1A,MSH6
GO: Biological Process	GO:0042692	muscle cell differentiation		0.008004	1	0.03422	0.2682	3	412	FGF10,DAXX,CTNNA1
GO: Biological Process	GO:0042176	regulation of protein catabolic process		0.008111	1	0.03422	0.2682	3	414	TIMP2,TIMP4,ARAF
GO: Biological Process	GO:0002069	columnar/cuboidal epithelial cell maturation		0.008134	1	0.03422	0.2682	1	8	CDKN1A
GO: Biological Process	GO:0032808	lacrimal gland development		0.008134	1	0.03422	0.2682	1	8	FGF10
GO: Biological Process	GO:1903431	positive regulation of cell maturation		0.008134	1	0.03422	0.2682	1	8	RUNX1
GO: Biological Process	GO:0002318	myeloid progenitor cell differentiation		0.008134	1	0.03422	0.2682	1	8	RUNX1
GO: Biological Process	GO:0060054	positive regulation of epithelial cell proliferation involved in wound healing		0.008134	1	0.03422	0.2682	1	8	FGF10
GO: Biological Process	GO:0051547	regulation of keratinocyte migration		0.008134	1	0.03422	0.2682	1	8	FGF10
GO: Biological Process	GO:0071493	cellular response to UV-B		0.008134	1	0.03422	0.2682	1	8	CDKN1A
GO: Biological Process	GO:0048752	semicircular canal morphogenesis		0.008134	1	0.03422	0.2682	1	8	FGF10
GO: Biological Process	GO:0033601	positive regulation of mammary gland epithelial cell proliferation		0.008134	1	0.03422	0.2682	1	8	CCND1
GO: Biological Process	GO:0070141	response to UV-A		0.008134	1	0.03422	0.2682	1	8	CCND1
GO: Biological Process	GO:0051549	positive regulation of keratinocyte migration		0.008134	1	0.03422	0.2682	1	8	FGF10
GO: Biological Process	GO:0090400	stress-induced premature senescence		0.008134	1	0.03422	0.2682	1	8	CDKN1A
GO: Biological Process	GO:0052547	regulation of peptidase activity		0.008219	1	0.03447	0.2702	3	416	TIMP2,TIMP4,PTTG2
GO: Biological Process	GO:0051346	negative regulation of hydrolase activity		0.008273	1	0.0346	0.2712	3	417	TIMP2,TIMP4,PTTG2
GO: Biological Process	GO:0001819	positive regulation of cytokine production		0.008327	1	0.0347	0.272	3	418	ADAM17,TNFRSF1A,RUNX1
GO: Biological Process	GO:0071901	negative regulation of protein serine/threonine kinase activity		0.008345	1	0.0347	0.272	2	136	CDKN1A,CDKN1C
GO: Biological Process	GO:0016477	cell migration		0.008379	1	0.03474	0.2722	5	1300	FGF10,ADAM17,VCAN,MMP3,COL1A2
GO: Biological Process	GO:0045321	leukocyte activation		0.008811	1	0.0363	0.2845	4	828	CDKN1A,MSH6,FGF10,ADAM17
GO: Biological Process	GO:0030856	regulation of epithelial cell differentiation		0.008824	1	0.0363	0.2845	2	140	CCND1,TNFRSF1A
GO: Biological Process	GO:0050671	positive regulation of lymphocyte proliferation		0.008946	1	0.0363	0.2845	2	141	CDKN1A,FGF10
GO: Biological Process	GO:0006928	movement of cell or subcellular component		0.009002	1	0.0363	0.2845	6	1882	FGF10,ADAM17,VCAN,CTNNA1,MMP3,COL1A2
GO: Biological Process	GO:0002870	T cell anergy		0.009147	1	0.0363	0.2845	1	9	RUNX1
GO: Biological Process	GO:0002667	regulation of T cell anergy		0.009147	1	0.0363	0.2845	1	9	RUNX1
GO: Biological Process	GO:0002911	regulation of lymphocyte anergy		0.009147	1	0.0363	0.2845	1	9	RUNX1
GO: Biological Process	GO:0060592	mammary gland formation		0.009147	1	0.0363	0.2845	1	9	FGF10
GO: Biological Process	GO:0051095	regulation of helicase activity		0.009147	1	0.0363	0.2845	1	9	MSH6
GO: Biological Process	GO:0002249	lymphocyte anergy		0.009147	1	0.0363	0.2845	1	9	RUNX1
GO: Biological Process	GO:0090154	positive regulation of sphingolipid biosynthetic process		0.009147	1	0.0363	0.2845	1	9	TNFRSF1A
GO: Biological Process	GO:0060638	mesenchymal-epithelial cell signaling		0.009147	1	0.0363	0.2845	1	9	FGF10
GO: Biological Process	GO:2000304	positive regulation of ceramide biosynthetic process		0.009147	1	0.0363	0.2845	1	9	TNFRSF1A
GO: Biological Process	GO:0035270	endocrine system development		0.009191	1	0.0363	0.2845	2	143	CDKN1C,FGF10
GO: Biological Process	GO:0008584	male gonad development		0.009191	1	0.0363	0.2845	2	143	CCND1,CTNNA1
GO: Biological Process	GO:0032946	positive regulation of mononuclear cell proliferation		0.009191	1	0.0363	0.2845	2	143	CDKN1A,FGF10
GO: Biological Process	GO:0046546	development of primary male sexual characteristics		0.009191	1	0.0363	0.2845	2	143	CCND1,CTNNA1
GO: Biological Process	GO:0030163	protein catabolic process		0.009415	1	0.03709	0.2907	4	844	TIMP2,TIMP4,ARAF,MMP3
GO: Biological Process	GO:1901575	organic substance catabolic process		0.009664	1	0.03796	0.2975	6	1910	TIMP2,TIMP4,ACAN,ARAF,VCAN,MMP3
GO: Biological Process	GO:0006357	regulation of transcription by RNA polymerase II		0.00981	1	0.03811	0.2987	6	1916	CDKN1C,FGF10,DAXX,CCND1,TNFRSF1A,RUNX1
GO: Biological Process	GO:0051249	regulation of lymphocyte activation		0.009878	1	0.03811	0.2987	3	445	CDKN1A,MSH6,FGF10
GO: Biological Process	GO:0030335	positive regulation of cell migration		0.009878	1	0.03811	0.2987	3	445	FGF10,ADAM17,MMP3
GO: Biological Process	GO:0031328	positive regulation of cellular biosynthetic process		0.009933	1	0.03811	0.2987	6	1921	CDKN1C,TIMP2,FGF10,DAXX,TNFRSF1A,RUNX1
GO: Biological Process	GO:1904018	positive regulation of vasculature development		0.009945	1	0.03811	0.2987	2	149	TNFRSF1A,RUNX1
GO: Biological Process	GO:0070665	positive regulation of leukocyte proliferation		0.009945	1	0.03811	0.2987	2	149	CDKN1A,FGF10
GO: Biological Process	GO:0051270	regulation of cellular component movement		0.01005	1	0.03811	0.2987	4	860	FGF10,ADAM17,CTNNA1,MMP3
GO: Biological Process	GO:0048565	digestive tract development		0.01007	1	0.03811	0.2987	2	150	CDKN1A,FGF10
GO: Biological Process	GO:0060174	limb bud formation		0.01016	1	0.03811	0.2987	1	10	FGF10
GO: Biological Process	GO:0030916	otic vesicle formation		0.01016	1	0.03811	0.2987	1	10	FGF10
GO: Biological Process	GO:0030853	negative regulation of granulocyte differentiation		0.01016	1	0.03811	0.2987	1	10	RUNX1
GO: Biological Process	GO:0030575	nuclear body organization		0.01016	1	0.03811	0.2987	1	10	DAXX
GO: Biological Process	GO:0060872	semicircular canal development		0.01016	1	0.03811	0.2987	1	10	FGF10
GO: Biological Process	GO:0071550	death-inducing signaling complex assembly		0.01016	1	0.03811	0.2987	1	10	TNFRSF1A
GO: Biological Process	GO:0033129	positive regulation of histone phosphorylation		0.01016	1	0.03811	0.2987	1	10	DAXX
GO: Biological Process	GO:0060513	prostatic bud formation		0.01016	1	0.03811	0.2987	1	10	FGF10
GO: Biological Process	GO:0010838	positive regulation of keratinocyte proliferation		0.01016	1	0.03811	0.2987	1	10	FGF10
GO: Biological Process	GO:0040012	regulation of locomotion		0.01029	1	0.03846	0.3014	4	866	FGF10,ADAM17,CTNNA1,MMP3
GO: Biological Process	GO:0032355	response to estradiol		0.01033	1	0.03846	0.3014	2	152	FGF10,CCND1
GO: Biological Process	GO:0030879	mammary gland development		0.01033	1	0.03846	0.3014	2	152	FGF10,CCND1
GO: Biological Process	GO:0000077	DNA damage checkpoint		0.01059	1	0.03933	0.3083	2	154	CDKN1A,CCND1
GO: Biological Process	GO:2000147	positive regulation of cell motility		0.01068	1	0.03956	0.31	3	458	FGF10,ADAM17,MMP3
GO: Biological Process	GO:0033209	tumor necrosis factor-mediated signaling pathway		0.01073	1	0.03962	0.3105	2	155	ADAM17,TNFRSF1A
GO: Biological Process	GO:0009891	positive regulation of biosynthetic process		0.01091	1	0.0399	0.3127	6	1959	CDKN1C,TIMP2,FGF10,DAXX,TNFRSF1A,RUNX1
GO: Biological Process	GO:0010212	response to ionizing radiation		0.01099	1	0.0399	0.3127	2	157	CDKN1A,CCND1
GO: Biological Process	GO:0000187	activation of MAPK activity		0.01099	1	0.0399	0.3127	2	157	FGF10,DAXX
GO: Biological Process	GO:0001525	angiogenesis		0.01107	1	0.0399	0.3127	3	464	FGF10,TNFRSF1A,RUNX1
GO: Biological Process	GO:0045741	positive regulation of epidermal growth factor-activated receptor activity		0.01117	1	0.0399	0.3127	1	11	ADAM17
GO: Biological Process	GO:0070341	fat cell proliferation		0.01117	1	0.0399	0.3127	1	11	FGF10
GO: Biological Process	GO:0060693	regulation of branching involved in salivary gland morphogenesis		0.01117	1	0.0399	0.3127	1	11	FGF10
GO: Biological Process	GO:0070344	regulation of fat cell proliferation		0.01117	1	0.0399	0.3127	1	11	FGF10
GO: Biological Process	GO:0030854	positive regulation of granulocyte differentiation		0.01117	1	0.0399	0.3127	1	11	RUNX1
GO: Biological Process	GO:0060430	lung saccule development		0.01117	1	0.0399	0.3127	1	11	FGF10
GO: Biological Process	GO:0060019	radial glial cell differentiation		0.01117	1	0.0399	0.3127	1	11	FGF10
GO: Biological Process	GO:0043589	skin morphogenesis		0.01117	1	0.0399	0.3127	1	11	COL1A2
GO: Biological Process	GO:0010820	positive regulation of T cell chemotaxis		0.01117	1	0.0399	0.3127	1	11	ADAM17
GO: Biological Process	GO:1901991	negative regulation of mitotic cell cycle phase transition		0.01126	1	0.04013	0.3145	2	159	CDKN1A,CCND1
GO: Biological Process	GO:0051272	positive regulation of cellular component movement		0.01146	1	0.04073	0.3192	3	470	FGF10,ADAM17,MMP3
GO: Biological Process	GO:0048534	hematopoietic or lymphoid organ development		0.01165	1	0.04128	0.3235	4	898	CDKN1C,FGF10,ADAM17,RUNX1
GO: Biological Process	GO:0007093	mitotic cell cycle checkpoint		0.01167	1	0.04128	0.3235	2	162	CDKN1A,CCND1
GO: Biological Process	GO:0040017	positive regulation of locomotion		0.01192	1	0.04193	0.3286	3	477	FGF10,ADAM17,MMP3
GO: Biological Process	GO:0031570	DNA integrity checkpoint		0.01195	1	0.04193	0.3286	2	164	CDKN1A,CCND1
GO: Biological Process	GO:0048568	embryonic organ development		0.01206	1	0.04193	0.3286	3	479	CDKN1C,FGF10,RUNX1
GO: Biological Process	GO:0009314	response to radiation		0.01213	1	0.04193	0.3286	3	480	CDKN1A,MSH6,CCND1
GO: Biological Process	GO:0042340	keratan sulfate catabolic process		0.01218	1	0.04193	0.3286	1	12	ACAN
GO: Biological Process	GO:0030208	dermatan sulfate biosynthetic process		0.01218	1	0.04193	0.3286	1	12	VCAN
GO: Biological Process	GO:2001044	regulation of integrin-mediated signaling pathway		0.01218	1	0.04193	0.3286	1	12	CTNNA1
GO: Biological Process	GO:1903140	regulation of establishment of endothelial barrier		0.01218	1	0.04193	0.3286	1	12	TNFRSF1A
GO: Biological Process	GO:0090399	replicative senescence		0.01218	1	0.04193	0.3286	1	12	CDKN1A
GO: Biological Process	GO:0016264	gap junction assembly		0.01218	1	0.04193	0.3286	1	12	CTNNA1
GO: Biological Process	GO:1901550	regulation of endothelial cell development		0.01218	1	0.04193	0.3286	1	12	TNFRSF1A
GO: Biological Process	GO:0030203	glycosaminoglycan metabolic process		0.01237	1	0.04248	0.3329	2	167	ACAN,VCAN
GO: Biological Process	GO:0072089	stem cell proliferation		0.01251	1	0.04286	0.3359	2	168	CTNNA1,RUNX1
GO: Biological Process	GO:0001889	liver development		0.01265	1	0.04321	0.3386	2	169	CCND1,RUNX1
GO: Biological Process	GO:1901988	negative regulation of cell cycle phase transition		0.01279	1	0.04321	0.3386	2	170	CDKN1A,CCND1
GO: Biological Process	GO:0008284	positive regulation of cell proliferation		0.01284	1	0.04321	0.3386	4	924	CDKN1A,FGF10,CCND1,ADAM17
GO: Biological Process	GO:0000165	MAPK cascade		0.01303	1	0.04321	0.3386	4	928	TIMP2,FGF10,DAXX,ARAF
GO: Biological Process	GO:0061008	hepaticobiliary system development		0.01308	1	0.04321	0.3386	2	172	CCND1,RUNX1
GO: Biological Process	GO:0051147	regulation of muscle cell differentiation		0.01308	1	0.04321	0.3386	2	172	DAXX,CTNNA1
GO: Biological Process	GO:0051546	keratinocyte migration		0.01319	1	0.04321	0.3386	1	13	FGF10
GO: Biological Process	GO:2000833	positive regulation of steroid hormone secretion		0.01319	1	0.04321	0.3386	1	13	RUNX1
GO: Biological Process	GO:2000194	regulation of female gonad development		0.01319	1	0.04321	0.3386	1	13	RUNX1
GO: Biological Process	GO:0061140	lung secretory cell differentiation		0.01319	1	0.04321	0.3386	1	13	FGF10
GO: Biological Process	GO:0048935	peripheral nervous system neuron development		0.01319	1	0.04321	0.3386	1	13	RUNX1
GO: Biological Process	GO:1903209	positive regulation of oxidative stress-induced cell death		0.01319	1	0.04321	0.3386	1	13	MMP3
GO: Biological Process	GO:0071600	otic vesicle morphogenesis		0.01319	1	0.04321	0.3386	1	13	FGF10
GO: Biological Process	GO:0060576	intestinal epithelial cell development		0.01319	1	0.04321	0.3386	1	13	CDKN1A
GO: Biological Process	GO:0060601	lateral sprouting from an epithelium		0.01319	1	0.04321	0.3386	1	13	FGF10
GO: Biological Process	GO:0048934	peripheral nervous system neuron differentiation		0.01319	1	0.04321	0.3386	1	13	RUNX1
GO: Biological Process	GO:0010819	regulation of T cell chemotaxis		0.01319	1	0.04321	0.3386	1	13	ADAM17
GO: Biological Process	GO:0030205	dermatan sulfate metabolic process		0.01319	1	0.04321	0.3386	1	13	VCAN
GO: Biological Process	GO:0032486	Rap protein signal transduction		0.01319	1	0.04321	0.3386	1	13	TIMP2
GO: Biological Process	GO:2001236	regulation of extrinsic apoptotic signaling pathway		0.01323	1	0.04323	0.3388	2	173	FGF10,CTNNA1
GO: Biological Process	GO:0050679	positive regulation of epithelial cell proliferation		0.01352	1	0.04409	0.3455	2	175	FGF10,CCND1
GO: Biological Process	GO:0006022	aminoglycan metabolic process		0.01367	1	0.04447	0.3485	2	176	ACAN,VCAN
GO: Biological Process	GO:0051384	response to glucocorticoid		0.01381	1	0.04474	0.3507	2	177	CDKN1A,CCND1
GO: Biological Process	GO:2000377	regulation of reactive oxygen species metabolic process		0.01381	1	0.04474	0.3507	2	177	CDKN1A,MMP3
GO: Biological Process	GO:0001553	luteinization		0.01419	1	0.04515	0.3539	1	14	RUNX1
GO: Biological Process	GO:0030207	chondroitin sulfate catabolic process		0.01419	1	0.04515	0.3539	1	14	VCAN
GO: Biological Process	GO:2000303	regulation of ceramide biosynthetic process		0.01419	1	0.04515	0.3539	1	14	TNFRSF1A
GO: Biological Process	GO:0046541	saliva secretion		0.01419	1	0.04515	0.3539	1	14	FGF10
GO: Biological Process	GO:0035112	genitalia morphogenesis		0.01419	1	0.04515	0.3539	1	14	FGF10
GO: Biological Process	GO:0033327	Leydig cell differentiation		0.01419	1	0.04515	0.3539	1	14	CCND1
GO: Biological Process	GO:0033160	positive regulation of protein import into nucleus, translocation		0.01419	1	0.04515	0.3539	1	14	TNFRSF1A
GO: Biological Process	GO:0002664	regulation of T cell tolerance induction		0.01419	1	0.04515	0.3539	1	14	RUNX1
GO: Biological Process	GO:0035264	multicellular organism growth		0.01426	1	0.0452	0.3543	2	180	CDKN1C,DAXX
GO: Biological Process	GO:0002694	regulation of leukocyte activation		0.01427	1	0.0452	0.3543	3	510	CDKN1A,MSH6,FGF10
GO: Biological Process	GO:0007163	establishment or maintenance of cell polarity		0.01441	1	0.04554	0.3569	2	181	FGF10,CTNNA1
GO: Biological Process	GO:0023014	signal transduction by protein phosphorylation		0.01472	1	0.04643	0.3639	4	962	TIMP2,FGF10,DAXX,ARAF
GO: Biological Process	GO:0071417	cellular response to organonitrogen compound		0.0148	1	0.04657	0.365	3	517	CTNNA1,MMP3,COL1A2
GO: Biological Process	GO:1901136	carbohydrate derivative catabolic process		0.01487	1	0.04667	0.3658	2	184	ACAN,VCAN
GO: Biological Process	GO:1905038	regulation of membrane lipid metabolic process		0.0152	1	0.04679	0.3667	1	15	TNFRSF1A
GO: Biological Process	GO:0050872	white fat cell differentiation		0.0152	1	0.04679	0.3667	1	15	FGF10
GO: Biological Process	GO:0090153	regulation of sphingolipid biosynthetic process		0.0152	1	0.04679	0.3667	1	15	TNFRSF1A
GO: Biological Process	GO:0050651	dermatan sulfate proteoglycan biosynthetic process		0.0152	1	0.04679	0.3667	1	15	VCAN
GO: Biological Process	GO:0033127	regulation of histone phosphorylation		0.0152	1	0.04679	0.3667	1	15	DAXX
GO: Biological Process	GO:0002517	T cell tolerance induction		0.0152	1	0.04679	0.3667	1	15	RUNX1
GO: Biological Process	GO:0071850	mitotic cell cycle arrest		0.0152	1	0.04679	0.3667	1	15	CDKN1A
GO: Biological Process	GO:0090136	epithelial cell-cell adhesion		0.0152	1	0.04679	0.3667	1	15	CTNNA1
GO: Biological Process	GO:0033197	response to vitamin E		0.0152	1	0.04679	0.3667	1	15	CCND1
GO: Biological Process	GO:0031330	negative regulation of cellular catabolic process		0.01533	1	0.04708	0.369	2	187	TIMP2,TIMP4
GO: Biological Process	GO:0045934	negative regulation of nucleobase-containing compound metabolic process		0.01539	1	0.04717	0.3697	5	1508	CDKN1C,MSH6,DAXX,CCND1,RUNX1
GO: Biological Process	GO:0042306	regulation of protein import into nucleus		0.01548	1	0.04735	0.3711	2	188	CDKN1A,TNFRSF1A
GO: Biological Process	GO:0031960	response to corticosteroid		0.0158	1	0.04807	0.3768	2	190	CDKN1A,CCND1
GO: Biological Process	GO:0060284	regulation of cell development		0.01594	1	0.04807	0.3768	4	985	TIMP2,CTNNA1,TNFRSF1A,RUNX1
GO: Biological Process	GO:0043207	response to external biotic stimulus		0.016	1	0.04807	0.3768	4	986	TIMP4,FGF10,ADAM17,TNFRSF1A
GO: Biological Process	GO:0051707	response to other organism		0.016	1	0.04807	0.3768	4	986	TIMP4,FGF10,ADAM17,TNFRSF1A
GO: Biological Process	GO:1904589	regulation of protein import		0.01611	1	0.04807	0.3768	2	192	CDKN1A,TNFRSF1A
GO: Biological Process	GO:1900409	positive regulation of cellular response to oxidative stress		0.01621	1	0.04807	0.3768	1	16	MMP3
GO: Biological Process	GO:0006702	androgen biosynthetic process		0.01621	1	0.04807	0.3768	1	16	HSD17B3
GO: Biological Process	GO:0050655	dermatan sulfate proteoglycan metabolic process		0.01621	1	0.04807	0.3768	1	16	VCAN
GO: Biological Process	GO:2001241	positive regulation of extrinsic apoptotic signaling pathway in absence of ligand		0.01621	1	0.04807	0.3768	1	16	CTNNA1
GO: Biological Process	GO:0007220	Notch receptor processing		0.01621	1	0.04807	0.3768	1	16	ADAM17
GO: Biological Process	GO:0010310	regulation of hydrogen peroxide metabolic process		0.01621	1	0.04807	0.3768	1	16	MMP3
GO: Biological Process	GO:0050930	induction of positive chemotaxis		0.01621	1	0.04807	0.3768	1	16	FGF10
GO: Biological Process	GO:0016446	somatic hypermutation of immunoglobulin genes		0.01621	1	0.04807	0.3768	1	16	MSH6
GO: Biological Process	GO:0045893	positive regulation of transcription, DNA-templated		0.01623	1	0.04807	0.3768	5	1528	CDKN1C,FGF10,DAXX,TNFRSF1A,RUNX1
GO: Biological Process	GO:1903508	positive regulation of nucleic acid-templated transcription		0.01623	1	0.04807	0.3768	5	1528	CDKN1C,FGF10,DAXX,TNFRSF1A,RUNX1
GO: Biological Process	GO:2001235	positive regulation of apoptotic signaling pathway		0.01627	1	0.04811	0.377	2	193	DAXX,CTNNA1
GO: Biological Process	GO:0050878	regulation of body fluid levels		0.01646	1	0.04856	0.3806	3	538	FGF10,CCND1,COL1A2
GO: Biological Process	GO:1903046	meiotic cell cycle process		0.01659	1	0.04885	0.3829	2	195	MSH6,PTTG2
GO: Biological Process	GO:0000086	G2/M transition of mitotic cell cycle		0.01691	1	0.04963	0.3889	2	197	CDKN1A,CCND1
GO: Biological Process	GO:1902680	positive regulation of RNA biosynthetic process		0.01701	1	0.04963	0.3889	5	1546	CDKN1C,FGF10,DAXX,TNFRSF1A,RUNX1
GO: Biological Process	GO:0002566	somatic diversification of immune receptors via somatic mutation		0.01721	1	0.04963	0.3889	1	17	MSH6
GO: Biological Process	GO:0002467	germinal center formation		0.01721	1	0.04963	0.3889	1	17	ADAM17
GO: Biological Process	GO:0031293	membrane protein intracellular domain proteolysis		0.01721	1	0.04963	0.3889	1	17	ADAM17
GO: Biological Process	GO:0008340	determination of adult lifespan		0.01721	1	0.04963	0.3889	1	17	MSH6
GO: Biological Process	GO:0042693	muscle cell fate commitment		0.01721	1	0.04963	0.3889	1	17	FGF10
GO: Biological Process	GO:0071732	cellular response to nitric oxide		0.01721	1	0.04963	0.3889	1	17	MMP3
GO: Biological Process	GO:0010224	response to UV-B		0.01721	1	0.04963	0.3889	1	17	CDKN1A
GO: Biological Process	GO:1902884	positive regulation of response to oxidative stress		0.01721	1	0.04963	0.3889	1	17	MMP3
GO: Biological Process	GO:0050920	regulation of chemotaxis		0.01724	1	0.04963	0.3889	2	199	FGF10,ADAM17
GO: Biological Process	GO:0046578	regulation of Ras protein signal transduction		0.0174	1	0.05	0.3918	2	200	TIMP2,FGF10
