# Supplementary material for: Integrative analysis of common genes and driver mutations implicated in hormone stimulation for four cancers in women
Source: PeerJ. 2019 Jun 6;7:e6872. doi: 10.7717/peerj.6872 (PMC6556371; doi:10.7717/peerj.6872)
Supplement: Supplemental Information 12 [file peerj-07-6872-s012.xlsx]

## Sheet: Sheet1
Gene	Number of connection	Ovulation cycle genes
MMP20	21
BAK1	20
BCL2A1	20	YES
MMP27	20
BCL2L13	19	YES
MCL1	19
ERBB3	18
MMP21	16
MMP3	16
MMP25	15
MMP24	13
BOK	12
MMP15	12
EGFR	11	YES
ESR1	11	YES
BAX	10
BCL2L10	10	YES
ERBB4	10
MMP2	10	YES
MMP10	8
MMP16	7
BCL2L1	6	YES
BCL2L2	2	YES
MMP14	2	YES
PGR	2	YES
ERBB2	1	YES
